# Supplementary material for: State-specific, racial and ethnic heterogeneity in trends of firearm-related fatality rates in the USA from 2000 to 2010
Source: HighWire-hosted journal article supplement (doi:10.1136/bmjopen-2014-005628), 2014-08-14

**Supplementary Table 1: Firearm related trends in death, annual rate of change in death, lives lost and saved in the United States by states, WISQARS 2000 to 2010.**

|                  | Age-adjusted firearm deaths per 100,000 population |       |       |       |       |       |       |       |       |       |       |       | Change in rate |                |         | Lives lost/ saved (-) |          |
|------------------|----------------------------------------------------|-------|-------|-------|-------|-------|-------|-------|-------|-------|-------|-------|----------------|----------------|---------|-----------------------|----------|
|                  | 2000                                               | 2001  | 2002  | 2003  | 2004  | 2005  | 2006  | 2007  | 2008  | 2009  | 2010  | Total | Annual         | 95% CI         | P-trend | 11 years              | Per year |
| All              | 10.14                                              | 10.31 | 10.43 | 10.29 | 9.99  | 10.27 | 10.22 | 10.24 | 10.23 | 10.05 | 10.07 | 10.21 | -0.17          | -0.044, 0.010  | 0.181   | -5527.8               | -502.5   |
| <b>Northeast</b> |                                                    |       |       |       |       |       |       |       |       |       |       |       |                |                |         |                       |          |
| Massachusetts    | 2.73                                               | 3.00  | 3.13  | 3.09  | 3.16  | 3.42  | 3.22  | 3.55  | 3.34  | 3.1   | 4.03  | 3.24  | 0.074          | 0.025, 0.122   | 0.008   | 52.4                  | 4.8      |
| Rhode Island     | 5.10                                               | 4.30  | 5.14  | 3.12  | 3.61  | 3.60  | 4.21  | 3.40  | 3.94  | 5.02  | 4.60  | 4.18  | -0.013         | -0.180, 0.155  | 0.869   | -1.5                  | -0.1     |
| New Jersey       | 4.11                                               | 4.44  | 4.88  | 5.42  | 5.37  | 5.15  | 5.82  | 5.25  | 4.94  | 4.70  | 5.20  | 5.03  | 0.063          | -0.035, 0.161  | 0.182   | 59.8                  | 5.4      |
| Connecticut      | 5.32                                               | 5.63  | 4.32  | 4.37  | 5.00  | 5.34  | 4.99  | 4.15  | 5.60  | 4.90  | 5.85  | 5.04  | 0.028          | -0.103, 0.159  | 0.637   | 10.8                  | 1.0      |
| New York         | 5.70                                               | 5.54  | 5.13  | 5.32  | 4.88  | 5.21  | 5.14  | 5.04  | 4.90  | 4.79  | 5.07  | 5.15  | -0.064         | -0.104, -0.023 | 0.006   | -134.9                | -12.3    |
| New Hampshire    | 6.27                                               | 7.23  | 5.91  | 6.8   | 5.02  | 6.62  | 6.22  | 5.56  | 6.86  | 6.34  | 8.22  | 6.49  | 0.065          | -0.126, 0.255  | 0.461   | 9.2                   | 0.8      |
| Maine            | 8.55                                               | 7.29  | 6.63  | 6.02  | 7.9   | 7.71  | 7.28  | 7.61  | 8.42  | 8.58  | 7.86  | 7.61  | 0.100          | -0.077, 0.277  | 0.232   | 14.4                  | 1.3      |
| Vermont          | 8.74                                               | 8.20  | 9.74  | 7.58  | 9.41  | 6.79  | 8.14  | 8.08  | 8.19  | 8.72  | 10.21 | 8.53  | 0.037          | -0.222, 0.296  | 0.753   | 2.5                   | 0.2      |
| Pennsylvania     | 10.15                                              | 9.53  | 9.96  | 9.87  | 10.2  | 10.76 | 10.9  | 10.52 | 10.53 | 10.41 | 10.11 | 10.27 | 0.064          | -0.014, 0.142  | 0.095   | 87.8                  | 8.0      |
| <b>Midwest</b>   |                                                    |       |       |       |       |       |       |       |       |       |       |       |                |                |         |                       |          |
| Iowa             | 6.46                                               | 6.37  | 6.73  | 6.94  | 6.45  | 6.71  | 6.34  | 4.99  | 7.25  | 6.23  | 6.8   | 6.5   | -0.017         | -0.157, 0.124  | 0.796   | -5.6                  | -0.5     |
| Minnesota        | 6.34                                               | 6.49  | 6.06  | 6.5   | 7.04  | 6.94  | 6.3   | 6.48  | 6.97  | 6.17  | 6.76  | 6.57  | 0.024          | -0.053, 0.101  | 0.495   | 13.5                  | 1.2      |
| Nebraska         | 9.77                                               | 8.12  | 8.05  | 7.64  | 6.71  | 7.67  | 7.69  | 7.95  | 8.27  | 7.26  | 8.16  | 7.94  | -0.071         | -0.231, 0.090  | 0.346   | -13.8                 | -1.3     |
| Wisconsin        | 7.99                                               | 8.70  | 8.08  | 8.44  | 7.37  | 8.48  | 7.56  | 8.54  | 7.72  | 7.91  | 8.57  | 8.14  | -0.008         | -0.113, 0.096  | 0.859   | -4.9                  | -0.4     |
| North Dakota     | 6.6                                                | 7.6   | 9.12  | 8.83  | 7.5   | 8.9   | 6.62  | 8.27  | 8.51  | 8.92  | 9.56  | 8.23  | 0.155          | -0.086, 0.395  | 0.180   | 11.1                  | 1.0      |
| Illinois         | 9.00                                               | 10.21 | 9.69  | 9.01  | 7.8   | 8.01  | 8.08  | 8.03  | 8.55  | 8.17  | 8.19  | 8.61  | -0.155         | -0.286, -0.025 | 0.025   | -215.3                | -19.6    |
| South Dakota     | 7.47                                               | 7.1   | 7.91  | 9.86  | 9.97  | 10.2  | 9.74  | 6.14  | 10.5  | 9.31  | 9.23  | 8.89  | 0.157          | -0.168, 0.481  | 0.304   | 13.5                  | 1.2      |
| Ohio             | 7.81                                               | 9.00  | 9.31  | 8.12  | 8.97  | 9.63  | 9.66  | 9.55  | 9.67  | 8.5   | 9.95  | 9.1   | 0.122          | -0.010, 0.253  | 0.066   | 153.8                 | 14.0     |
| Kansas           | 11.15                                              | 9.93  | 9.7   | 11.13 | 10.73 | 9.25  | 10.84 | 10.35 | 9.7   | 10.76 | 10.44 | 10.37 | -0.012         | -0.158, 0.135  | 0.860   | -3.6                  | -0.3     |
| Michigan         | 10.83                                              | 10.83 | 10.99 | 10.33 | 10.52 | 10.78 | 11.53 | 11.03 | 10.96 | 11.07 | 10.98 | 10.9  | 0.037          | -0.034, 0.109  | 0.271   | 40.6                  | 3.7      |
| Indiana          | 10.88                                              | 11.82 | 11.68 | 11.19 | 10.22 | 11.11 | 11.63 | 10.5  | 11.24 | 11.33 | 10.82 | 11.13 | -0.031         | -0.143, 0.081  | 0.546   | -21.4                 | -1.9     |
| Missouri         | 13.24                                              | 13.14 | 12.21 | 11.42 | 11.44 | 12.9  | 13    | 12.79 | 13.74 | 13.71 | 13.93 | 12.88 | 0.135          | -0.036, 0.306  | 0.108   | 86.1                  | 7.8      |

| South                |       |       |       |       |       |       |       |       |       |       |       |       |        |                |       |        |       |
|----------------------|-------|-------|-------|-------|-------|-------|-------|-------|-------|-------|-------|-------|--------|----------------|-------|--------|-------|
| Delaware             | 6.66  | 9.47  | 9.07  | 7.86  | 8.78  | 8.78  | 9.19  | 8.91  | 10.65 | 8.76  | 9.88  | 8.89  | 0.201  | -0.018, 0.419  | 0.067 | 18.7   | 1.7   |
| Virginia             | 11.13 | 10.61 | 11.01 | 10.86 | 10.81 | 11.48 | 10.36 | 10.4  | 10.18 | 10.28 | 10.69 | 10.71 | -0.068 | -0.149, 0.014  | 0.092 | -56.6  | -5.1  |
| Texas                | 10.57 | 11.22 | 10.83 | 11.21 | 10.66 | 11.09 | 10.47 | 10.89 | 10.83 | 10.98 | 10.93 | 10.89 | 0.001  | -0.054, 0.056  | 0.976 | 2.5    | 0.2   |
| Florida              | 10.19 | 10.68 | 10.97 | 11.05 | 10.46 | 9.95  | 11.05 | 12.02 | 12.18 | 11.98 | 11.44 | 11.12 | 0.160  | 0.038, 0.282   | 0.016 | 310.1  | 28.2  |
| Maryland             | 11.91 | 11.46 | 11.54 | 11.96 | 11.93 | 11.86 | 12.1  | 12.04 | 11.61 | 10.19 | 9.26  | 11.39 | -0.169 | -0.335, -0.002 | 0.048 | -103.5 | -9.4  |
| North Carolina       | 13.56 | 13.06 | 13.43 | 12.35 | 12.21 | 12.74 | 12.55 | 12.17 | 12.31 | 11.59 | 11.57 | 12.49 | -0.174 | -0.255, -0.092 | 0.001 | -168.1 | -15.3 |
| Georgia              | 13.4  | 13.44 | 13.39 | 13.72 | 12.16 | 12.05 | 12.54 | 13.4  | 12.43 | 13.06 | 12.62 | 12.92 | -0.076 | -0.197, 0.045  | 0.189 | -75.0  | -6.8  |
| Kentucky             | 13.25 | 12.69 | 13.04 | 13.38 | 13.04 | 12.94 | 12.47 | 14.11 | 13.28 | 12.78 | 12.48 | 13.05 | -0.020 | -0.140, 0.010  | 0.713 | -9.2   | -0.8  |
| Oklahoma             | 13.21 | 14.01 | 12.81 | 12.77 | 12.86 | 13.15 | 13.26 | 13.18 | 13.91 | 14.33 | 14.31 | 13.45 | 0.105  | -0.028, 0.238  | 0.108 | 41.3   | 3.8   |
| South Carolina       | 12.42 | 13.72 | 13.69 | 14.17 | 13.5  | 13.75 | 13.88 | 13.09 | 13.17 | 13.52 | 13.92 | 13.55 | 0.032  | -0.088, 0.152  | 0.561 | 15.2   | 1.4   |
| West Virginia        | 12.99 | 13.15 | 14.67 | 14.01 | 13.6  | 13.72 | 13.32 | 14.06 | 12.66 | 13.21 | 14.23 | 13.6  | 0.002  | -0.183, 0.188  | 0.978 | 0.4    | 0.0   |
| Tennessee            | 15.63 | 14.47 | 15.4  | 14.11 | 14.54 | 16.03 | 15.3  | 14.74 | 15.46 | 15.06 | 14.42 | 15.03 | -0.013 | -0.148, 0.123  | 0.837 | -8.6   | -0.8  |
| Arkansas             | 15.42 | 15.27 | 16.29 | 14.96 | 14.65 | 15.62 | 15.12 | 15.09 | 15.6  | 16.03 | 14.39 | 15.31 | -0.033 | -0.193, 0.126  | 0.648 | -10.1  | -0.9  |
| Alabama              | 17.14 | 16.41 | 16.08 | 16.8  | 14.79 | 15.99 | 16.7  | 17.24 | 17.31 | 17.18 | 16.18 | 16.53 | 0.045  | -0.128, 0.217  | 0.574 | 22.8   | 2.1   |
| Mississippi          | 16.56 | 17.64 | 17.34 | 16.81 | 16.41 | 15.98 | 16.54 | 18.28 | 19.25 | 16.65 | 16.05 | 17.06 | 0.015  | -0.209, 0.239  | 0.883 | 4.8    | 0.4   |
| Louisiana            | 17.58 | 17.46 | 19.31 | 18.61 | 19.52 | 18.35 | 19.02 | 19.77 | 18.34 | 18.03 | 19.11 | 18.62 | 0.082  | -0.081, 0.244  | 0.286 | 40.4   | 3.7   |
| District of Columbia | 22.24 | 25.46 | 29.79 | 25.71 | 22.64 | 23.47 | 19.99 | 21.66 | 20.01 | 15.96 | 14.62 | 21.71 | -1.067 | -1.621, -0.512 | 0.002 | -67.7  | -6.2  |
| West                 |       |       |       |       |       |       |       |       |       |       |       |       |        |                |       |        |       |
| Hawaii               | 4.2   | 3.74  | 2.82  | 2.88  | 3.1   | 2.14  | 2.38  | 2.44  | 3.04  | 3.34  | 3.21  | 3.02  | -0.057 | -0.190, 0.076  | 0.359 | -8.1   | -0.7  |
| Washington           | 8.94  | 8.53  | 9.34  | 9.17  | 9.17  | 8.8   | 8.37  | 8.32  | 8.69  | 9.14  | 8.92  | 8.85  | -0.018 | -0.099, 0.063  | 0.623 | -12.5  | -1.1  |
| California           | 9.27  | 9.31  | 9.75  | 9.78  | 9.24  | 9.52  | 9.15  | 8.84  | 8.5   | 8.17  | 7.7   | 9.01  | -0.166 | -0.249, -0.083 | 0.001 | -652.3 | -59.3 |
| Utah                 | 9.93  | 10.99 | 9.6   | 10.51 | 10.13 | 9.91  | 9.75  | 10.63 | 9.68  | 10.46 | 12.16 | 10.39 | 0.081  | -0.077, 0.240  | 0.276 | 22.1   | 2.0   |
| Oregon               | 10.81 | 10.16 | 10.49 | 10.72 | 10.36 | 10.68 | 10.16 | 9.91  | 9.73  | 10.31 | 11.33 | 10.44 | -0.011 | -0.127, 0.106  | 0.839 | -4.4   | -0.4  |
| Colorado             | 10.36 | 11.68 | 11.47 | 11.13 | 11.96 | 11.53 | 10.33 | 10.38 | 10.39 | 11.58 | 10.72 | 11.05 | -0.045 | -0.183, 0.092  | 0.474 | -23.1  | -2.1  |
| Idaho                | 10.19 | 13.5  | 12.42 | 12.33 | 13.04 | 13.94 | 12.69 | 12.75 | 11.4  | 12.85 | 12.73 | 12.56 | 0.077  | -0.148, 0.302  | 0.459 | 12.1   | 1.1   |
| Wyoming              | 11.72 | 13.91 | 18.87 | 17.46 | 11.15 | 13.39 | 14.85 | 14.66 | 16.91 | 17.59 | 15.54 | 15.09 | 0.267  | -0.257, 0.791  | 0.279 | 15.3   | 1.4   |
| Montana              | 14.85 | 17.77 | 14.61 | 15.68 | 13.05 | 16.85 | 12.25 | 13.54 | 15.73 | 16.04 | 15.56 | 15.11 | -0.040 | -0.420, 0.341  | 0.819 | -4.2   | -0.4  |

|            |       |       |       |       |       |       |       |       |       |       |       |       |        |                |       |        |       |
|------------|-------|-------|-------|-------|-------|-------|-------|-------|-------|-------|-------|-------|--------|----------------|-------|--------|-------|
| New Mexico | 16.08 | 15.26 | 16.61 | 17.55 | 15.15 | 13.89 | 14.45 | 14.85 | 14.68 | 14.48 | 14.84 | 15.23 | -0.184 | -0.376, 0.008  | 0.058 | -39.2  | -3.6  |
| Arizona    | 15.58 | 15.92 | 17.89 | 15.29 | 15.84 | 16    | 16.22 | 15.38 | 14.36 | 13.49 | 14.53 | 15.47 | -0.230 | -0.423, -0.036 | 0.025 | -147.2 | -13.4 |
| Nevada     | 17.26 | 16.54 | 17.06 | 17.04 | 16.74 | 16.09 | 16.3  | 15.87 | 15.15 | 15.11 | 14.49 | 16.07 | -0.264 | -0.441, -0.086 | 0.008 | -69.9  | -6.4  |
| Alaska     | 17.96 | 14.83 | 19.89 | 19.24 | 17.51 | 17.47 | 16.94 | 18.22 | 20.92 | 14.68 | 20.51 | 18.09 | 0.102  | -0.375, 0.580  | 0.639 | 7.5    | 0.7   |

All values are age-adjusted rates per 100,000 population.

Change denotes annual change in rate per 100,000. Negative value indicates decline in firearm death rates per 100,000 from 2000 to 2010 and positive value indicates increase in firearm death rate per 100,000 from 2000 to 2010.

CI denotes confidence intervals of the annual change in firearm death rate per 100,000.

P-trend calculated using meta-regression indicates the significance of the decline or the increase in firearm related death rates from 2000 to 2010.

Lives lost or saved are calculated by applying annual change to the total 11-year population from 2000 to 2010. The annual lives lost or saved are the total/ 11 years. Negative denotes lives saved and positive values are lives lost.

Data are from Center for Disease Control and Prevention (CDC)'s National center for Injury Prevention and Control Web-based Injury Statistics Query and Reporting System (WISQARS).

**Supplementary Table 2: US states with significant racial and ethnic trends within firearm fatality rates**

|                  |               | GA           | IN           | KA           | MN           | OK           | OR           | PA           | TX           | UT           |
|------------------|---------------|--------------|--------------|--------------|--------------|--------------|--------------|--------------|--------------|--------------|
| Overall          | FRF rate      | 12.92        | 11.13        | 10.37        | 6.57         | 13.45        | 10.44        | 10.27        | 10.89        | 10.39        |
|                  | Change        | -0.08        | -0.03        | -0.01        | 0.02         | 0.11         | -0.01        | 0.06         | 0.001        | 0.08         |
|                  | P-trend       | 0.19         | 0.55         | 0.86         | 0.49         | 0.11         | 0.84         | 0.095        | 0.98         | 0.28         |
| Caucasian        | FRF rate      | 12.16        | 9.25         | 9.46         | 6.04         | 12.94        | 10.64        | 7.84         | 10.81        | 10.66        |
|                  | Change        | -0.07        | 0.01         | 0.07         | 0.06         | -0.02        | 0.01         | 0.06         | 0.03         | 0.08         |
|                  | P-trend       | 0.36         | 0.77         | 0.38         | 0.12         | 0.74         | 0.89         | 0.076        | 0.45         | 0.34         |
|                  | Pop % change  | -3.8         | -2.0         | -1.7         | -3.3         | -2.2         | -2.0         | -2.6         | -2.3         | -1.4         |
| African American | FRF rate      | 14.05        | 28.92        | 24.14        | 13.52        | 20.04        | 11.47        | 27.48        | 13.37        | 7.73         |
|                  | Change        | -0.06        | <b>-0.66</b> | <b>-1.07</b> | <b>-0.61</b> | <b>0.93</b>  | -0.67        | -0.14        | -0.09        | ne           |
|                  | P-trend       | 0.57         | <b>0.012</b> | <b>0.021</b> | <b>0.038</b> | <b>0.008</b> | 0.23         | 0.59         | 0.60         | ne           |
|                  | Pop % change  | 2.3          | 1.2          | 0.6          | 1.9          | 0.4          | 0.4          | 1.3          | 0.6          | 0.5          |
| Other            | FRF rate      | 4.89         | 2.01         | 3.36         | 5.23         | 9.11         | 4.49         | 2.12         | 3.21         | 4.59         |
|                  | Change        | -0.32        | ne           | ne           | -0.35        | <b>0.37</b>  | -0.07        | -0.20        | <b>-0.19</b> | ne           |
|                  | P-trend       | 0.089        | ne           | ne           | 0.18         | <b>0.062</b> | 0.70         | 0.35         | <b>0.033</b> | ne           |
|                  | Pop % change  | 1.5          | 0.8          | 1.0          | 1.4          | 1.8          | 1.5          | 1.2          | 1.7          | 0.9          |
| Hispanic         | FRF rate      | 8.02         | 8.19         | 8.05         | 4.65         | 7.92         | 4.83         | 9.11         | 7.04         | 7.88         |
|                  | Change        | <b>-0.54</b> | -0.18        | -0.15        | -0.48        | -0.26        | <b>-0.33</b> | <b>-0.39</b> | <b>-0.21</b> | <b>-0.79</b> |
|                  | P-trend       | <b>0.012</b> | 0.33         | 0.49         | 0.31         | 0.21         | <b>0.037</b> | <b>0.065</b> | <b>0.004</b> | <b>0.030</b> |
|                  | Pop % change  | 3.5          | 2.5          | 3.5          | 1.8          | 3.7          | 3.7          | 2.5          | 5.6          | 3.9          |
| Non-Hispanic     | FRF rate      | 13.15        | 11.18        | 10.38        | 6.60         | 13.73        | 10.76        | 10.25        | 12.28        | 10.53        |
|                  | Change        | -0.02        | -0.04        | 0.01         | 0.05         | <b>0.15</b>  | 0.03         | <b>0.08</b>  | <b>0.14</b>  | <b>-0.15</b> |
|                  | P-trend       | 0.73         | 0.45         | 0.91         | 0.21         | <b>0.045</b> | 0.56         | <b>0.039</b> | <b>0.022</b> | <b>0.001</b> |
|                  | Pop % change  | -3.5         | -2.5         | -3.5         | -1.8         | -3.7         | -3.7         | -2.5         | -5.6         | -3.9         |
| Intent           | Homicide      | ↔            | ↔            | ↔            | ↔            | ↔            | ↔            | ↔            | ↔            | ↔            |
|                  | Suicides      | ↔            | ↔            | ↔            | ↔            | ↔            | ↔            | ↔            | ↔            | ↔            |
|                  | Undetermined  | ↔            | ne           | ne           | ne           | ne           | ne           | ↔            | ↔            | ne           |
|                  | Unintentional | ↔            | ↔            | ↔            | ne           | ↔            | ne           | ↔            | ↔            | ne           |

FRF: firearm related fatality, Pop % change: change in population percentage from 2000 to 2010. All values are age-adjusted rates per 100,000 population. Change denotes annual change in rate per 100,000. Negative value indicates decline in firearm death rates per 100,000 from 2000 to 2010 and positive value indicates increase in firearm death rate per 100,000 from 2000 to 2010. CI denotes confidence intervals of the annual change in firearm death rate per 100,000. SMD indicates standardized mean difference; is equal to annual change/standard deviation. P-trend calculated using meta-regression indicates the significance of the decline or the increase in firearm related death rates from 2000 to 2010. Data are from Center for Disease Control and Prevention (CDC)'s National center for Injury Prevention and Control Web-based Injury Statistics Query and Reporting System (WISQARS)

## Supplementary Figure 1A

## Firearm deaths from 2000 to 2010 by U.S census regions among Caucasians

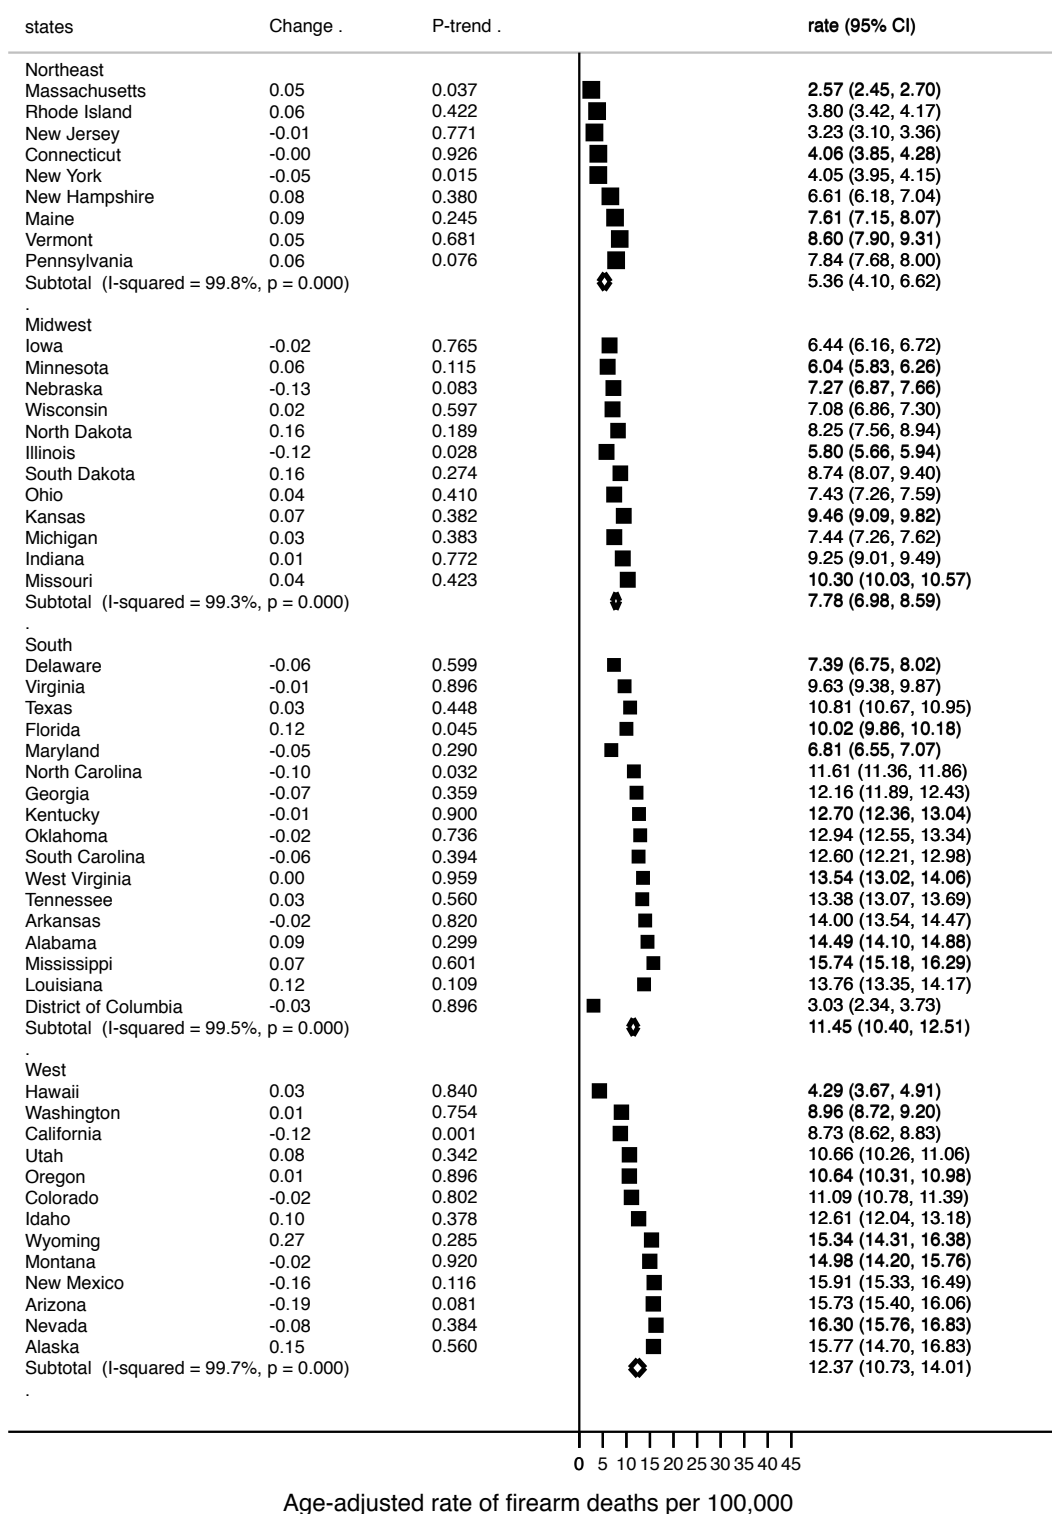

## Supplementary Figure 1B

Firearm deaths from 2000 to 2010 by U.S census regions among African-Americans

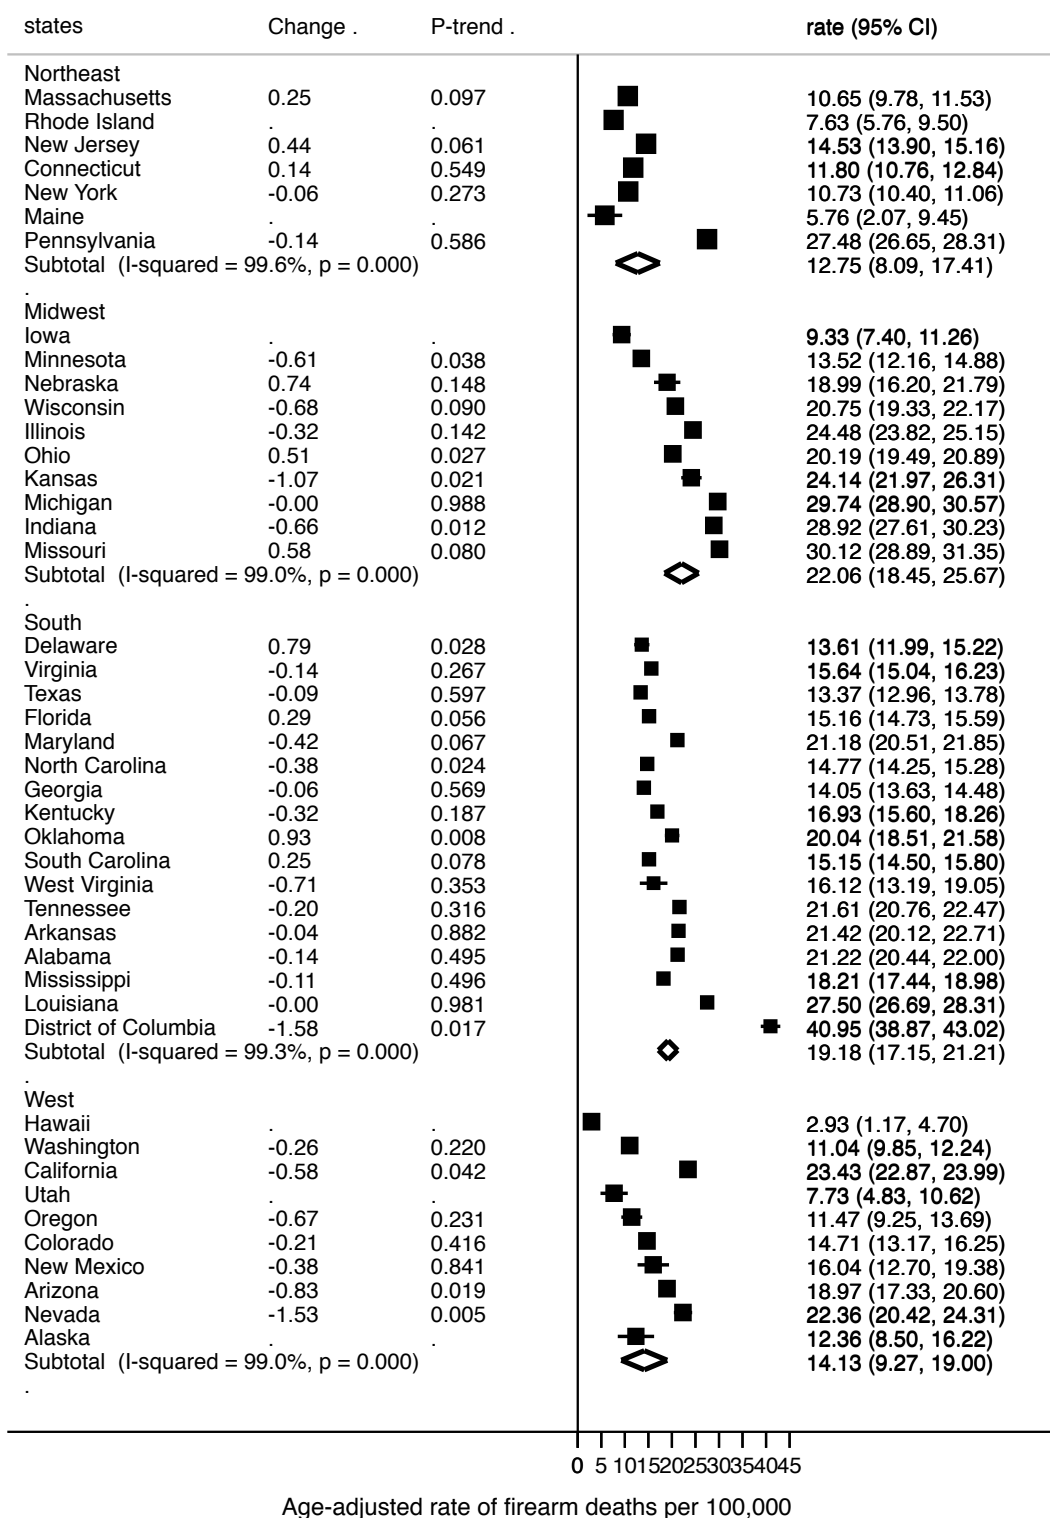

Supplementary Figure 1C

Firearm deaths from 2000 to 2010 by U.S census regions among other race

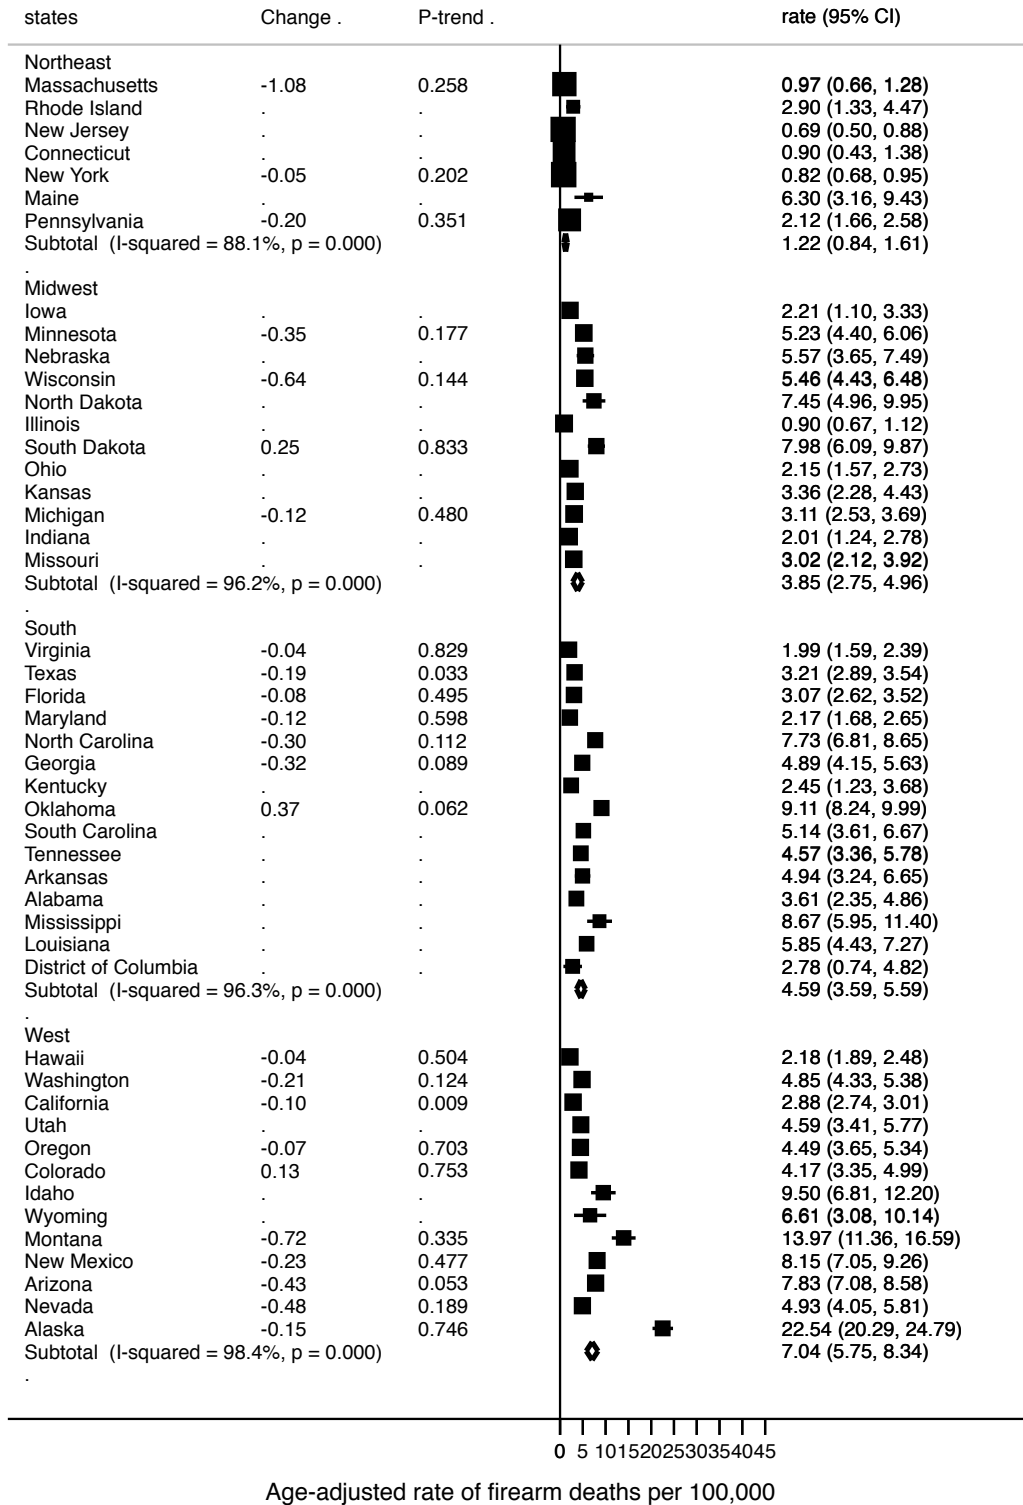

## Supplementary Figure 2A:

## Firearm deaths from 2000 to 2010 by U.S census regions among Hispanics

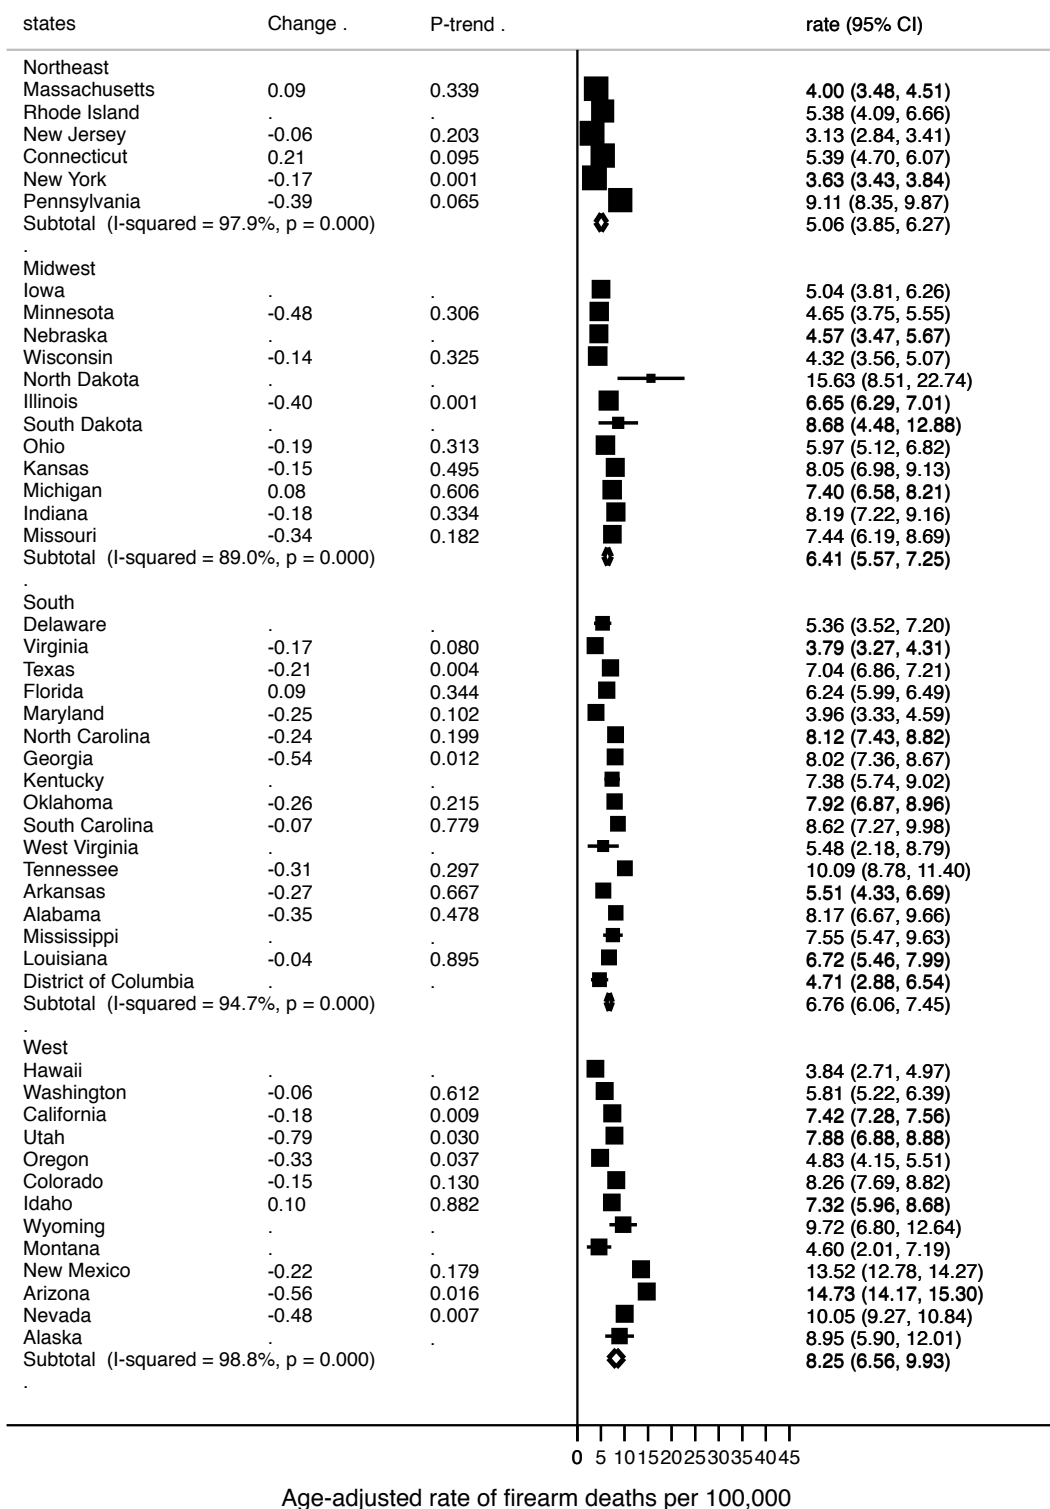



## Supplementary Figure 2B:

Firearm deaths from 2000 to 2010 by U.S census regions among non-Hispanics

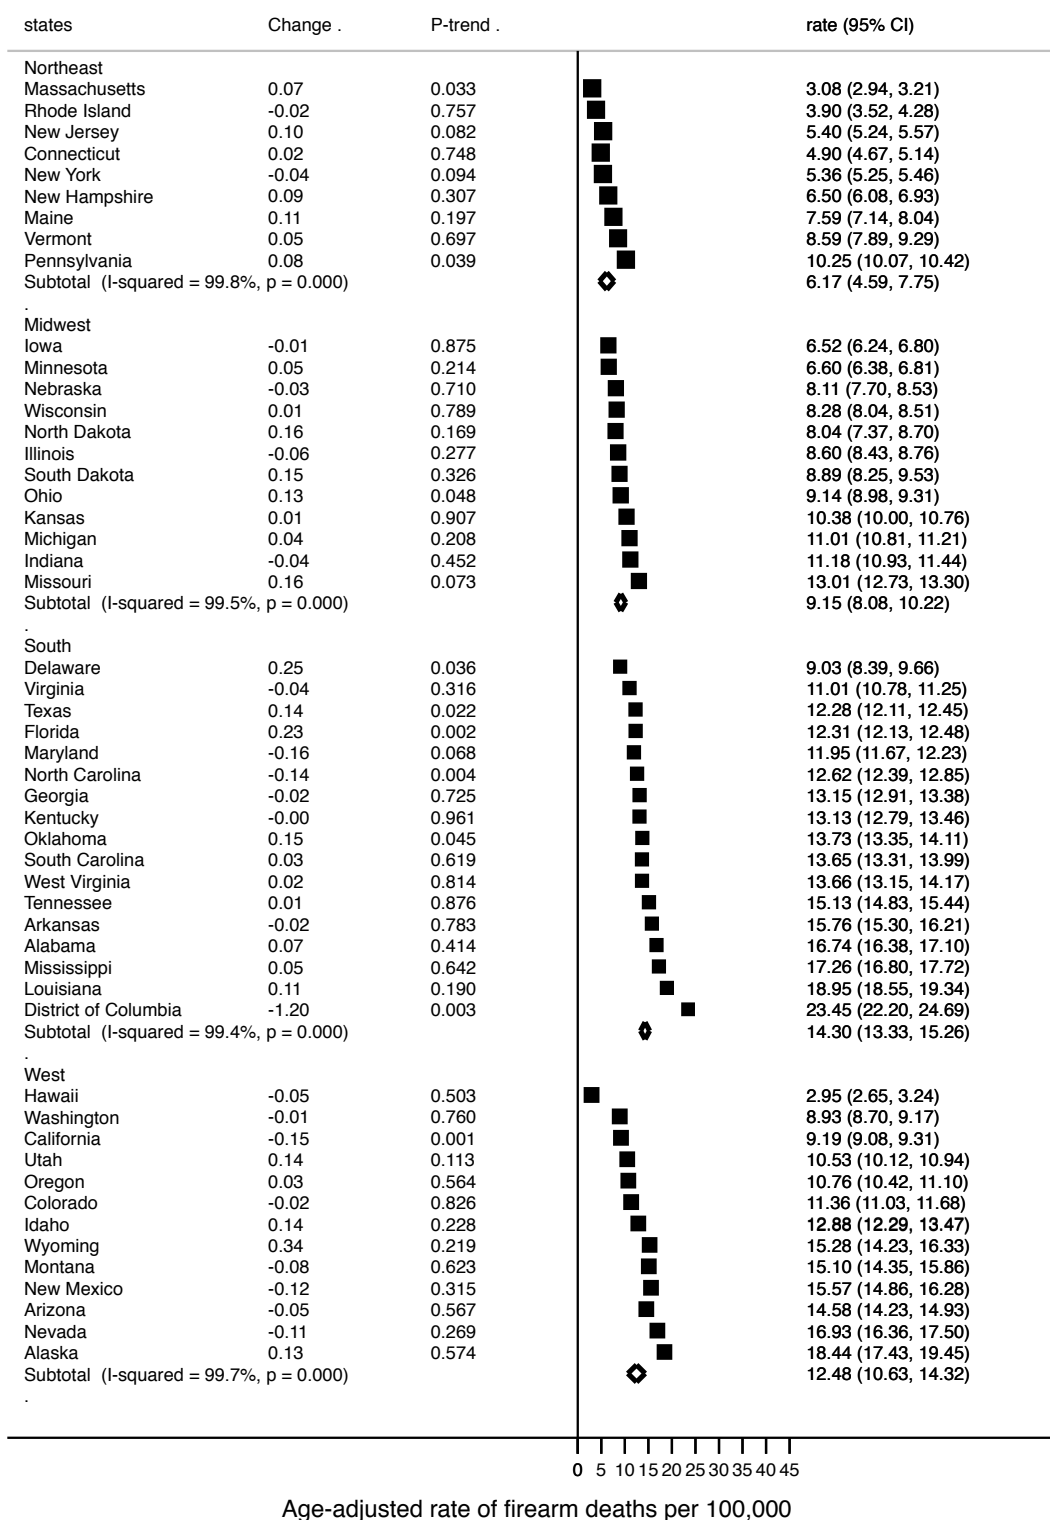

## Supplementary Figure 3A:

## Firearm deaths due to homicide from 2000 to 2010 by U.S census regions

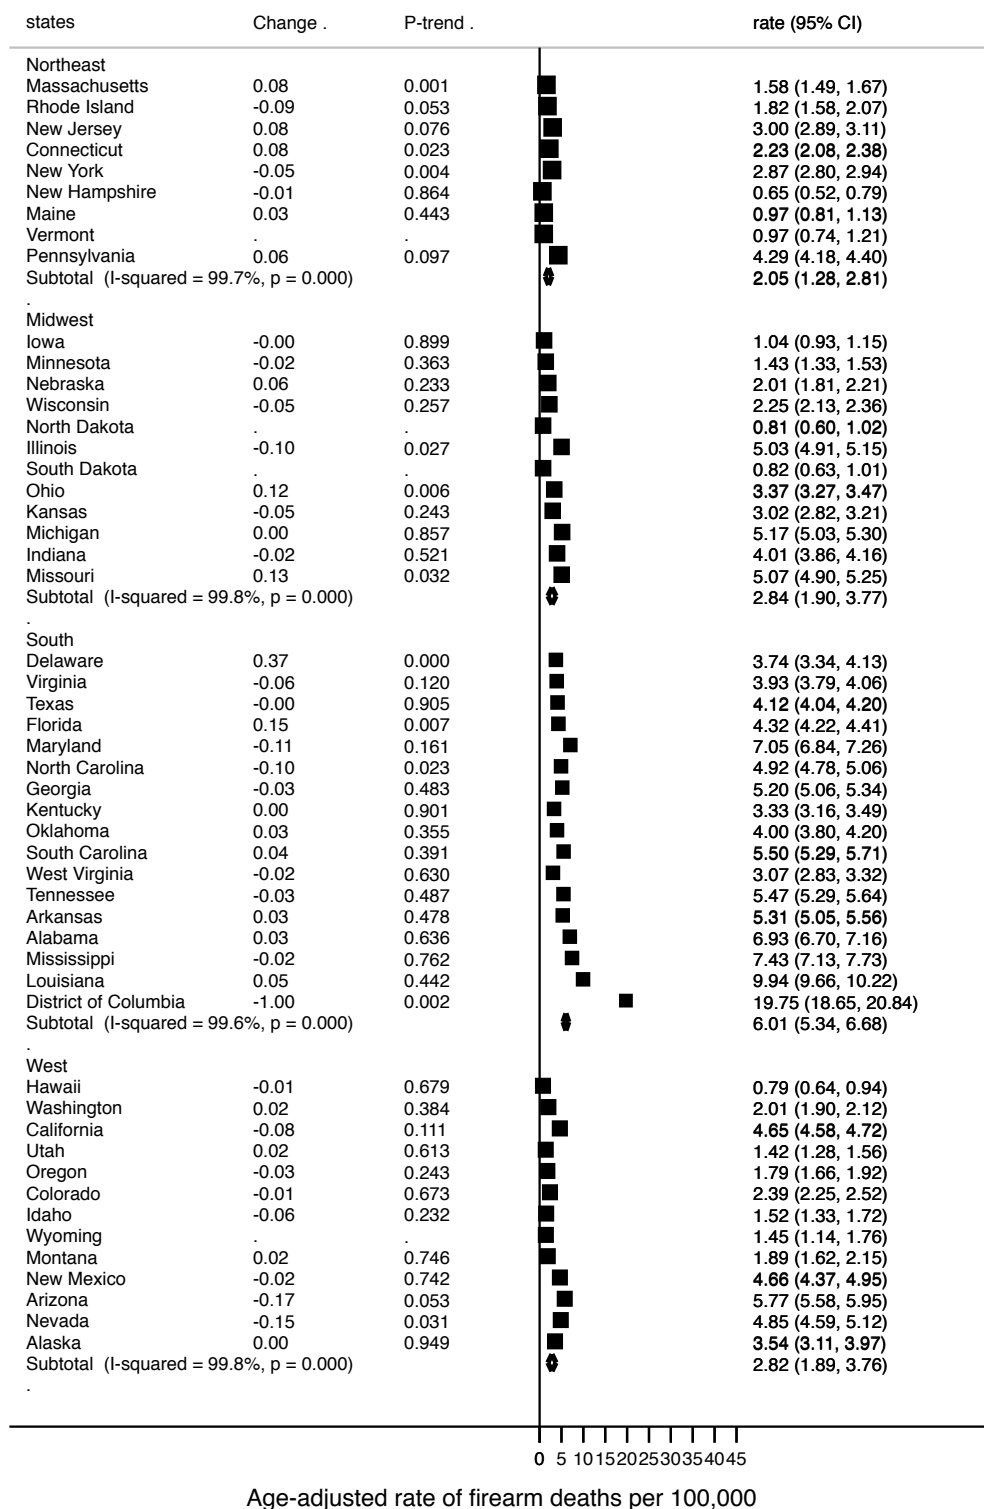

## Supplementary Figure 3B:

## Firearm deaths due to suicides from 2000 to 2010 by U.S census regions

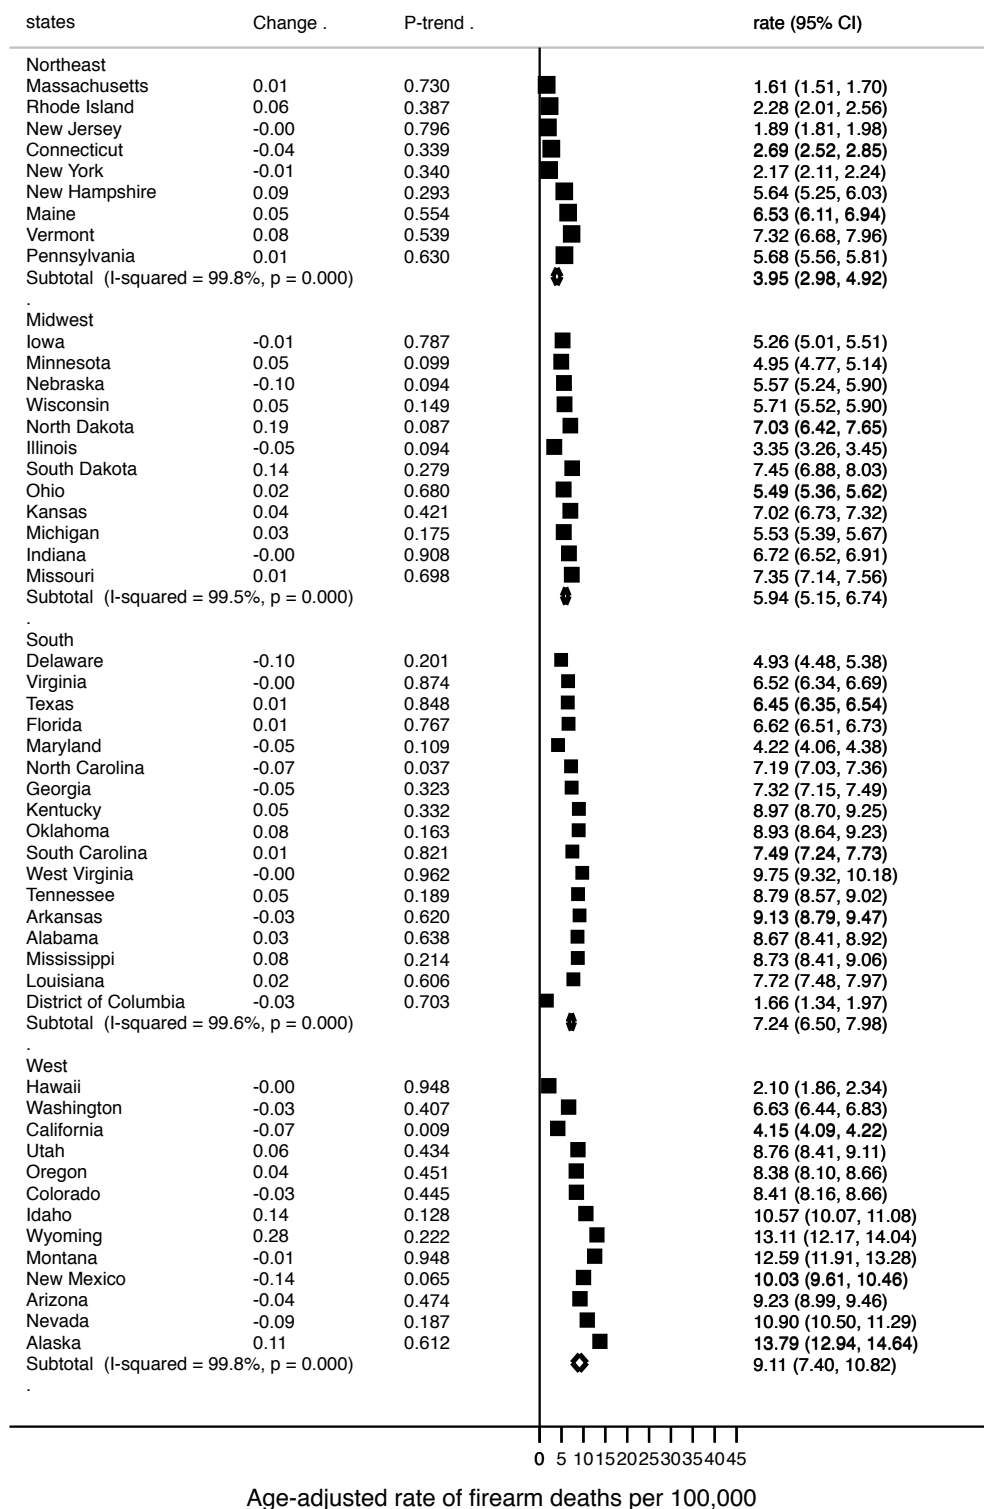

## Supplementary Figure 3C:

## Undetermined firearm deaths from 2000 to 2010 by U.S census regions

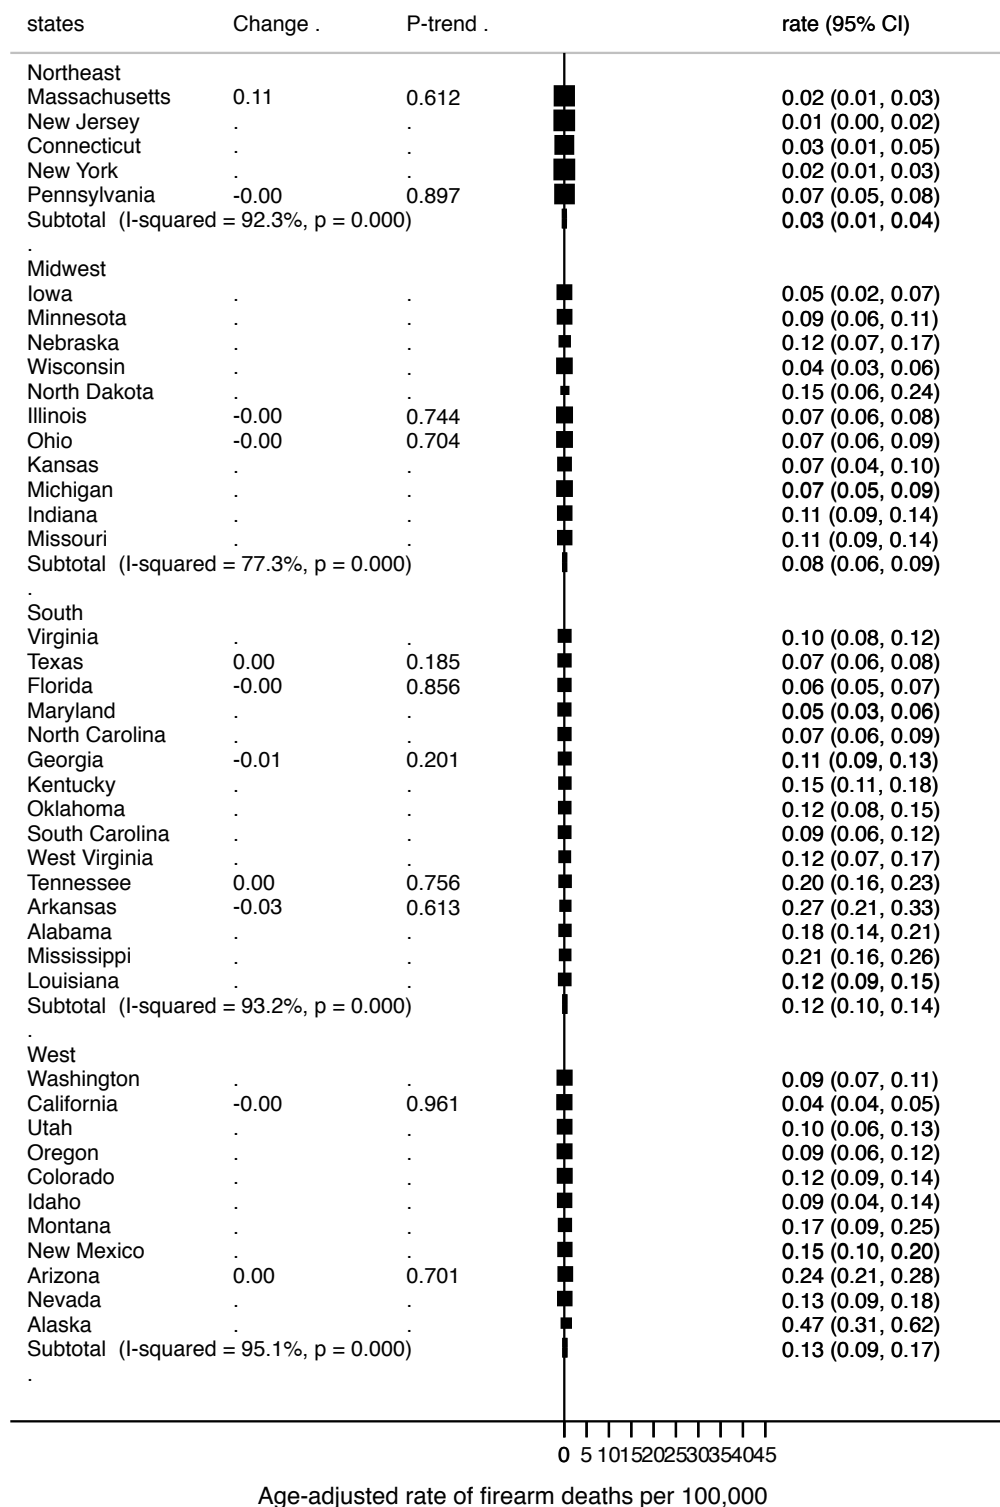

## Supplementary Figure 3D:

## Unintentional firearm deaths from 2000 to 2010 by U.S census regions

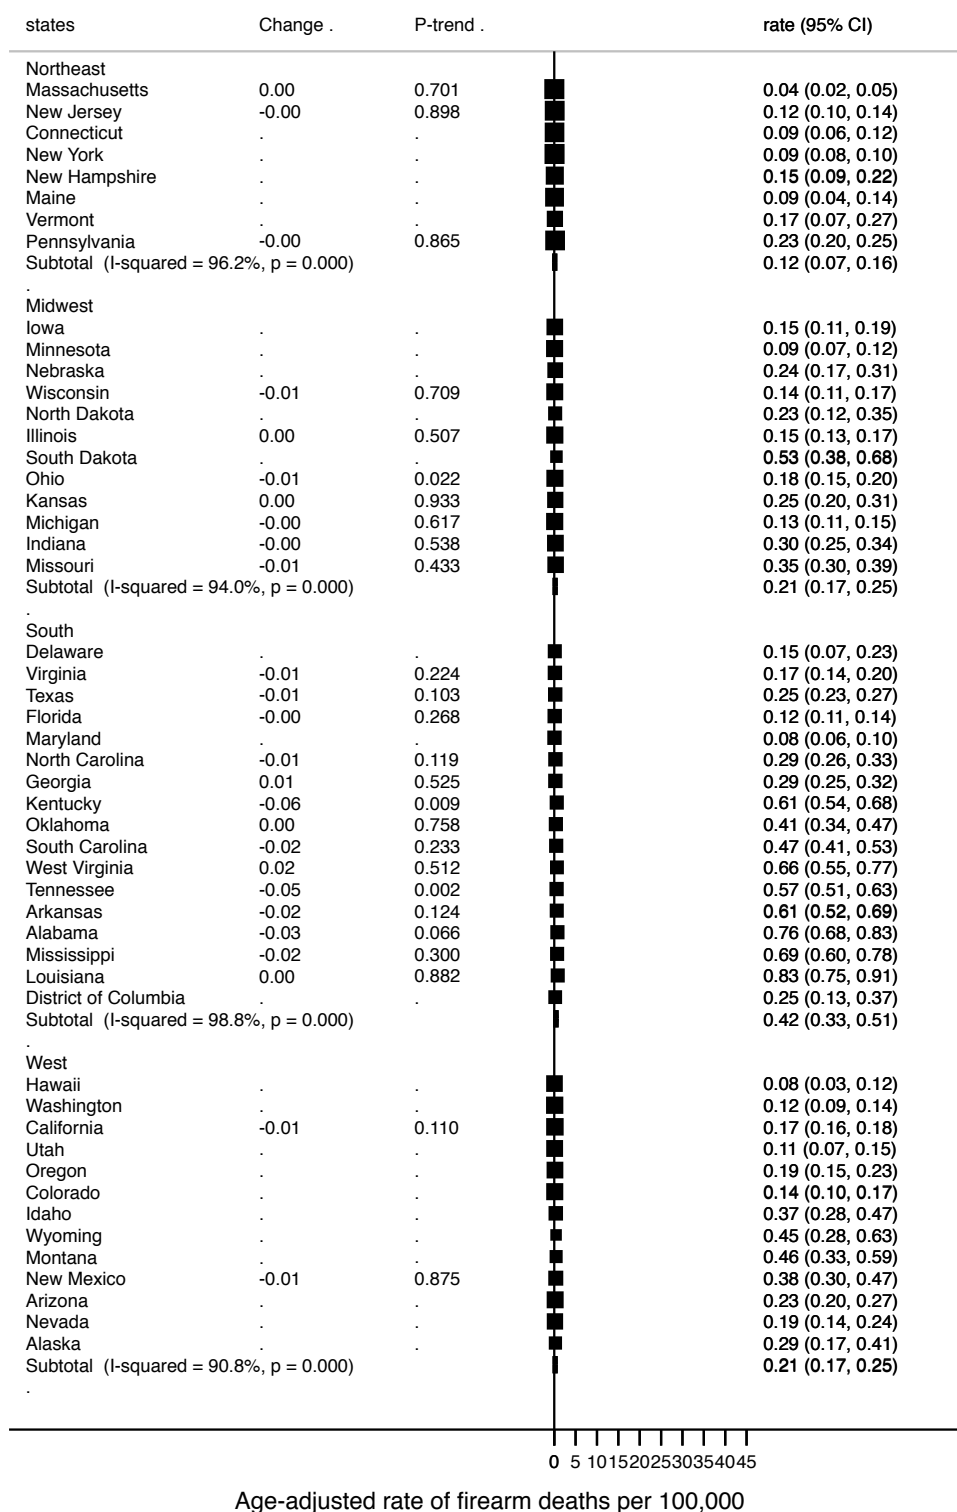

Supplement: bmjopen-2014-005628supp.pdf [file bmjopen-2014-005628supp.pdf]
