# Supplementary material for: State-specific, racial and ethnic heterogeneity in trends of firearm-related fatality rates in the USA from 2000 to 2010
Source: PubMed Central journal article supplement — BMJ Open. 2014 Sep 1;4(9):e005628. doi: 10.1136/bmjopen-2014-005628 (PMC4185336; doi:10.1136/bmjopen-2014-005628), 2014-09-01
Supplement: bmjopen-2014-005628.draft_revisions.pdf [file bmjopen-2014-005628.draft_revisions.pdf]

# BMJ Open

## State-specific and racial/ethnic heterogeneity in trends of firearm-related fatality rates in the United States from 2000-2010

|                                 |                                                                                                                                                                                                                                                                                                                                                                                                                                                                                   |
|---------------------------------|-----------------------------------------------------------------------------------------------------------------------------------------------------------------------------------------------------------------------------------------------------------------------------------------------------------------------------------------------------------------------------------------------------------------------------------------------------------------------------------|
| Journal:                        | <i>BMJ Open</i>                                                                                                                                                                                                                                                                                                                                                                                                                                                                   |
| Manuscript ID:                  | bmjopen-2014-005628                                                                                                                                                                                                                                                                                                                                                                                                                                                               |
| Article Type:                   | Research                                                                                                                                                                                                                                                                                                                                                                                                                                                                          |
| Date Submitted by the Author:   | 10-May-2014                                                                                                                                                                                                                                                                                                                                                                                                                                                                       |
| Complete List of Authors:       | Kalesan, Bindu; Columbia University, Surgery and Epidemiology<br>Vasan, Sowmya; Columbia University, Surgery<br>Mobily, Matthew; Columbia University, Epidemiology<br>Villarreal, Marcos; Columbia University, Epidemiology<br>Hlavacek, Patrick; Columbia University, Epidemiology<br>Teperman, Sheldon; Jacobi Medical Center, Trauma and Critical Care Services<br>Fagan, Jeffrey; Columbia University, Law & Epidemiology<br>Galea, Sandro; Columbia University, Epidemiology |
| <b>Primary Subject Heading</b>: | Public health                                                                                                                                                                                                                                                                                                                                                                                                                                                                     |
| Secondary Subject Heading:      | Public health                                                                                                                                                                                                                                                                                                                                                                                                                                                                     |
| Keywords:                       | EPIDEMIOLOGY, PREVENTIVE MEDICINE, PUBLIC HEALTH, STATISTICS & RESEARCH METHODS                                                                                                                                                                                                                                                                                                                                                                                                   |
|                                 |                                                                                                                                                                                                                                                                                                                                                                                                                                                                                   |

SCHOLARONE™  
Manuscripts

only

1  
2  
3 May 10, 2014  
4  
5  
6

7 **Title: State-specific and racial/ethnic heterogeneity in trends of firearm-**  
8 **related fatality rates in the United States from 2000-2010**  
9

10 Corresponding author:

11 Bindu Kalesan  
12 Department of Surgery & Epidemiology,  
13 Columbia University,  
14 650 W 168<sup>th</sup> Street Room 210  
15 New York, NY, USA  
16 Email: [kb2693@cumc.columbia.edu](mailto:kb2693@cumc.columbia.edu)  
17 Tel: 212-305-8880  
18  
19

20  
21 Co-authors:

22 Sowmya Vasam  
23 Department of Surgery,  
24 Columbia University,  
25 New York, NY, USA  
26 Email: [sv2436@cumc.columbia.edu](mailto:sv2436@cumc.columbia.edu)  
27  
28

29  
30 Matthew E Mobily  
31 Department of Epidemiology,  
32 Columbia University,  
33 New York, NY, USA  
34 Email: [mem2292@columbia.edu](mailto:mem2292@columbia.edu)  
35  
36

37 Marcos D Villarreal  
38 Department of Epidemiology,  
39 Columbia University,  
40 New York, NY, USA  
41 Email: [mdv2119@columbia.edu](mailto:mdv2119@columbia.edu)  
42  
43

44 Patrick Hlavacek  
45 Department of Epidemiology,  
46 Columbia University,  
47 New York, NY, USA  
48 Email: [ph2394@columbia.edu](mailto:ph2394@columbia.edu)  
49  
50

51 Sheldon Teperman  
52 Trauma and Critical Care Services,  
53 Jacobi Medical Center  
54 Bronx, NY, USA  
55 Email: [Sheldon.Teperman@nbhn.net](mailto:Sheldon.Teperman@nbhn.net)  
56  
57  
58  
59  
60

1  
2  
3 Jeffrey A Fagan  
4 Department of Law & Epidemiology,  
5 Columbia University,  
6 New York, NY, USA  
7 Email: [jfagan@law.columbia.edu](mailto:jfagan@law.columbia.edu)  
8  
9

10 Sandro Galea  
11 Department of Epidemiology,  
12 Columbia University,  
13 New York, NY, USA  
14 Email: [sgalea@cumc.columbia.edu](mailto:sgalea@cumc.columbia.edu)  
15  
16

17  
18  
19  
20  
21  
22  
23 Keywords: firearms, temporal trends, mortality  
24

25 Word count: 3000  
26  
27  
28  
29  
30  
31

32 Galea and Kalesan conceived and supervised the study. Kalesan and Vasani  
33 completed the analyses. Kalesan, Galea and Villarreal led the writing. Fagan,  
34 Teperman, Mobily and Hlavacek assisted with the study and analyses. Hlavacek  
35 assisted with obtaining state gun laws.  
36  
37  
38  
39  
40  
41  
42  
43  
44  
45  
46  
47  
48  
49  
50  
51  
52  
53  
54  
55  
56  
57  
58  
59  
60

**Abstract:**

**Objectives:** To document overall, racial/ethnic and intent-specific spatio-temporal trends of firearm related fatality rates (FRF-rate) in the United States.

**Design:** Cross-sectional study per year from 2000 to 2010.

**Setting:** United States.

**Participants:** All people in the US from 2000 to 2010.

**Outcome measures:** Data from the Web-based Injury Statistics Query and Reporting System from 2000-2010 was used to determine annual FRF-rates per 100,000 and by states, race/ethnicity and intent.

**Results:** National 11-year FRF-rate was 10.21 per 100,000, from 3.02 to in Hawaii to 18.62 in Louisiana: 60% of states had higher than national rates and 41 states showed no temporal change. National FRF-rates among blacks and whites were 18.51 and 9.05 per 100,000 and among Hispanics and non-Hispanics were 7.13 and 10.13 per 100,000; Hispanics had a decreasing change of -0.18, p-trend<0.0001. In states with increasing trends (Florida and Massachusetts), whites and non-Hispanics drove the rise; while in states with decreasing trends (California, North Carolina, Arizona, Nevada, New York, Illinois), Hispanics and blacks drove the fall. National FRF-rates due to homicides (4.1 per 100,000) and suicides (5.8 per 100,000) remained constant, but varied between states.

**Conclusion:** Endemic national FRF-rates mask a wide variation in time trends between states. FRF-rates were twice as high in blacks than whites but decreased among Hispanics. Efforts to identify state-specific best practices can contribute to changes in national FRF-rates that remain.

### Strengths of this study

- This study uses the best available data reporting system for surveillance of firearm mortality in US.
- Brings into light the overall state-specific variability of temporal trends of firearm mortality, which was obscured by the endemic national firearm fatality rates during 2000-2010 and according to race, ethnicity and intent from a seemingly stable national burden of firearm deaths.
- This is the first report that documents firearm fatality trends by ethnicity
- Our results call for identification of drivers of state-specific temporal trends to introduce tailored programs targeted to reduce deaths and injury due to firearms.

### Limitations of this study

- Possible under reporting of firearm fatal events, which cannot be verified.
- Despite the considerable state-specific heterogeneity, the actual variation in firearm mortality may be a feature of cities and counties with varying crime rates, and we do not address the variation existing at such level.
- Finally, comparisons made between other races may not be usefully interpreted due to the heterogeneity and the small frequency of events in this sub-population.

1  
2  
3  
4  
5  
6  
7  
8  
9  
10  
11  
12  
13  
14  
15  
16  
17  
18  
19  
20  
21  
22  
23  
24  
25  
26  
27  
28  
29  
30  
31  
32  
33  
34  
35  
36  
37  
38  
39  
40  
41  
42  
43  
44  
45  
46  
47  
48  
49  
50  
51  
52  
53  
54  
55  
56  
57  
58  
59  
60

Firearm violence increased during the 1980s and peaked in 1993, with 39,595 firearm deaths in the US and a firearm-related fatality rate (FRF-rate) of 15.0 per 100,000.<sup>1</sup> Since the turn of the 21<sup>st</sup> century, FRF-rates in the US have become endemic around 10.3 per 100,000 accounting for 17.5% of all injury deaths,<sup>2</sup> while the intent of firearm deaths was mainly suicide and homicide.<sup>3</sup>

The FRF-rate in 1993 among blacks was three-times greater than whites, but similar among Hispanics and non-Hispanics.<sup>1 4</sup> The overall fall in FRF after 2000 corresponded to a related narrowing of the racial gap between blacks and whites, where, by 2010, the FRF-rates among blacks was twice greater than whites.<sup>1</sup> Several factors have been posited that might explain these persistent racial differences, including socioeconomic determinants and increased firearm availability.<sup>5 6</sup>

Although the national temporal trends in FRF have been previously well documented,<sup>3 7 8</sup> there is ample reason to suspect substantial heterogeneity in FRF across states, such as dramatic differences in gun laws controlling access to firearms, variability in enforcement of national standards across states,<sup>8 9</sup> changing demographics and violence.<sup>10</sup> It is likely that some of the state-to-state heterogeneity in the potential determinants of FRF may also contribute to variability in racial/ethnic differences in FRF within states.

With this in mind, this study had two distinct aims. First, we aimed to document national and state-specific trends in FRF-rates along with the annual change in FRF-rates from 2000-2010 and second, to determine the racial, ethnic and intent-specific differences in FRF-rates within each state during the same time period.

## METHODS

### Data source

We accessed the restricted fatal injury data reports from the Web-based Injury Statistics Query and Reporting System (WISQARS™), an interactive database system provided by Centers for Disease Control and Prevention's (CDC) Injury Prevention and Control Unit (<http://www.cdc.gov/injury/wisqars/>).<sup>1</sup> The data in the WISQARS system is derived from CDC annual mortality data from National Vital Statistics System (NVSS), National Center for Health Statistics (NCHS) (<http://www.cdc.gov/nchs/>) and CDC. The NCHS and the National Association of Public Health Statistics and Information Systems restricts reporting NVSS data for cumulative frequencies <10 for sub-national geographic areas to prevent unintentional disclosure of cases. International Classification of Disease-10th Revision (ICD-10) was used for coding mortality data including intent of injury.<sup>11</sup>

### Study population and variables

Our study population consisted of national and state-specific fatal firearm injuries from 2000-2010 obtained from querying the WISQARS data system. Aggregate information such as number of firearm deaths, total population and age-adjusted rates by race (black, white, other), ethnicity (Hispanic and non-Hispanic) and intent (homicide/legal intervention, suicide, undetermined and unintentional) was obtained.

### Statistical analysis

1  
2  
3 The standard errors (SE) for national and state-specific age-adjusted FRF-  
4 rates per 100,000 persons were derived for the 11-year period and annually and by  
5 race, ethnicity and intent. Since only aggregate data could be obtained from  
6 WISQARS without individual patient data, we used random effects meta-analysis  
7 and meta-regression.<sup>12</sup> The rates in each category and the SEs were meta-analyzed  
8 using random-effects meta-analysis. Heterogeneity between states was assessed  
9 using  $I^2$  statistic; which ranges from 0 to 100% and denotes the proportion of  
10 variation across states other than by chance.<sup>13 14</sup> In order to assess the temporal  
11 trends from 2000-2010, we assumed linear trends across 11 years and used meta-  
12 regression to calculate the change in rates and the standard deviation (SD). The p-  
13 value from meta-regression was used to assess evidence for trend. Standardized  
14 mean difference (SMD) was calculated by dividing the annual change in age-  
15 adjusted rate by SD.<sup>15 16</sup> We do not present estimates for those states with number  
16 of deaths below 10. Lives-lost or saved are estimated by applying annual change to  
17 the total 11-year population (2000-2010). The difference between 11-year national  
18 and state-specific FRF-rates (overall and category-specific) were used to spatially  
19 represent the variation between states. STATA 13.1 (StataCorp LP, College Station,  
20 Texas; 2009) was used to analyze the data.  
21  
22  
23  
24  
25  
26  
27  
28  
29  
30  
31  
32  
33  
34  
35  
36  
37  
38  
39  
40  
41  
42  
43  
44  
45  
46  
47  
48  
49  
50  
51  
52  
53  
54  
55  
56  
57  
58  
59  
60



## RESULTS

Between 2000 and 2010, a total of 335,609 firearm-related deaths were recorded and the overall mortality rate was 10.21 per 100,000. The annual change in FRF-rate across 11-years was -0.017 with a 95% confidence interval (95% CI) of -0.044-0.010, p-trend=0.18, indicating no significant change in national FRF-rates. **Table 1** presents national FRF-rates, for 11-years and annually according to race, ethnicity and intent. Cumulative 11-year FRF-rates were disproportionately high among blacks (18.51) as compared to whites and other race groups, and lowest among other races (3.38). Among whites the FRF-rates were lower than the overall national 11-year rate while increasing from 8.97 to 9.20 from 2000-2010. This annual increase was small (0.006, SMD=0.11) but not significant, p-trend=0.71. Even though the FRF-rates among blacks were consistently higher than national FRF-rates, the annual rates reduced from 18.30 to 16.90; and this decline, -0.114 was not significant, SMD=-0.40, p-trend=0.22. The decline in FRF-rates from 4.76 to 3.25 among other races was significant (change=-0.12, SMD=-1.83, p-trend<0.0001). Annual reduction observed among Hispanics showed a significant reduction, -0.179, p-trend<0.0001 alongside an already low 11-year FRF-rate of 7.13. FRF-rates among non-Hispanics remained slightly above the national rates without increase. FRF-rate by intent was highest for suicides (5.80) while the annual change was minimal in all four categories with a small significant reduction for unintentional deaths (change=-0.010, SMD=-1.70, p-trend<0.0001).

1  
2  
3  
4  
5  
6  
7  
8  
9  
10  
11  
12  
13  
14  
15  
16  
17  
18  
19  
20  
21  
22  
23  
24  
25  
26  
27  
28  
29  
30  
31  
32  
33  
34  
35  
36  
37  
38  
39  
40  
41  
42  
43  
44  
45  
46  
47  
48  
49  
50  
51  
52  
53  
54  
55  
56  
57  
58  
59  
60

State-specific 11-year FRF-rates are represented in **Figure 1** and **Supplementary Table 1**. Hawaii (HI) (3.02) and Massachusetts (MA) (3.24) had the lowest 11-year FRF-rates, while Louisiana (LA) had the highest at 18.62. District of Columbia (DC) had the largest significant annual reduction at -1.067 (6.2 lives-saved per year, p-trend = 0.002) though it had the highest rate of 21.71. Although MA had a low FRF-rate, a significant increase was observed, change=0.074, p-trend=0.008. Florida (FL) also showed an increase, change=0.160, 28.2 lives-lost per year, p-trend=0.016. FRF-rates for Delaware (DL) and Ohio (OH) were 8.89 and 9.10, with a near significant increasing trend, changes of 0.20 and 0.12. FRF-rate in New York (NY) was 5.15 with a change=-0.064, 12.3 lives-saved per year, p-trend=0.006. Illinois (IL) had a significant reduction, change=-0.155, 19.6 lives-saved per year, p-trend=0.025). FRF-rates in CA was -0.166 (59.3 lives-saved per year, p-trend=0.001), Arizona (AZ) at -0.230 (13.4 lives-saved per year, p-trend=0.025) and Nevada (NV) at -0.264 (6.4 lives-saved per year, p-trend = 0.008). Maryland (MA) and North Carolina (NC) had a significant decline: change=-0.169, 9.4 lives-saved per year, p-trend=0.048 and -0.174, 15.3 lives-saved per year, p-trend=0.001).

The 11-year FRF-rates for each state by race are presented in **Figures 2A to 2C** and **Supplementary Figures 1A-C**. Among whites, the lowest rate was in MA with a significant increase from 2000-2010 (change=0.05, p-trend=0.037). FL also recorded a significant increase (change=0.12, p-trend=0.045) but had high 11-year FRF-rate, 10.02. NV recorded the highest and unchanging FRF-rate at 16.30. The four states that showed a significant declining trend from 2000-2010 were NY

1  
2  
3 (change=-0.05, p-trend=0.015), IL (change=-0.12, p-trend=0.028), NC (change=-  
4  
5 0.10, p-trend=0.032), and CA (change=-0.12, p-trend=0.001). Among blacks, HI had  
6  
7 the lowest 11-year FRF-rates at 2.93 while Missouri (MO) had the highest at 30.12  
8  
9 and DC was at 40.95. Oklahoma (OK), OH and DL had high 11-year rates at 20.04,  
10  
11 20.19 and 13.61 respectively with a significant increasing changes of 0.93, 0.51 and  
12  
13 0.79, p-trends of 0.008, 0.027 and 0.028 respectively. A declining trend was  
14  
15 observed among blacks in CA (change=-0.58, p-trend=0.042), AZ (change=-0.83, p-  
16  
17 trend=0.019), NV (change=-1.53, p-trend=0.005), NC (change=-0.38, p-  
18  
19 trend=0.024), Indiana (IN) (change=-0.66, p-trend=0.012), Kansas (KA) (change=-  
20  
21 1.07, p-trend=0.021), Minnesota (MN) (change=-0.61, p-trend=0.038), and DC  
22  
23 (change=-1.58, p-trend=0.017), even though their 11-year FRF-rates were high.  
24  
25 Among other races, Texas (TX) (change=-0.19, p-trend=0.033) and CA (change=-  
26  
27 0.10, p-trend=0.009) showed a significant decline.  
28  
29  
30  
31  
32  
33  
34  
35  
36

37 **Figures 3A-B** and **Supplementary Figures 3A-B** presents the 11-year FRF-  
38  
39 rates for each state by ethnicity. Georgia (GA) (change=-0.54, p-trend=0.012), CA  
40  
41 (change=-0.18, p-trend=0.009), Utah (UT) (change=-0.79, p-trend=0.030), AZ  
42  
43 (change=-0.56, p-trend=0.016), and NV (change=-0.48, p-trend=0.007) were five  
44  
45 high-FRF-rate states (>7.13) while NY (change=-0.17, p-trend=0.001), IL (change=-  
46  
47 0.40, p-trend=0.001), TX (change=-0.21, p-trend=0.004), and Oregon (OR)  
48  
49 (change=-0.33, p-trend=0.037) were the four low-FRF-rate states with a significant  
50  
51 declining trend among Hispanics. No states demonstrated an increase among  
52  
53 Hispanics, while non-Hispanics showed a significant increasing trend in MA  
54  
55  
56  
57  
58  
59  
60

1  
2  
3 (change=0.07, p-trend=0.033), Pennsylvania (PA) (change=0.08, p-trend=0.039), OH  
4  
5 (change=0.13, p-trend=0.048), DL (change=0.25, p-trend=0.036), TX (change=0.14,  
6  
7 p-trend=0.022), FL (change=0.23, p-trend=0.002) and OK (change=0.15, p-  
8  
9 trend=0.045). A declining trend in non-Hispanics was observed in MD (change=-  
10  
11 0.16, p-trend=0.068), NC (change=-0.14, p-trend=0.004) and CA (change=-0.15, p-  
12  
13 trend=0.001). In TX, the FRF-rates among Hispanics (change=-0.21, p-trend=0.004)  
14  
15 demonstrated a significant decline and a significant increase among non-Hispanics  
16  
17 (change=0.14, p-trend=0.022) (**Supplementary Table 2**).

18  
19  
20  
21  
22  
23  
24  
25 FRF-rates from 2000-2010 and by intent is provided in **Figures 4A-D** and  
26  
27 **Supplementary Figures 4A-D**. Most of the northern states had low (<3.73)  
28  
29 homicide-FRF while southern states had high FRF. NY (change=-0.05, p-  
30  
31 trend=0.004), IL (change=-0.10, p-trend=0.027), NC (change=-0.10, p-trend=0.023),  
32  
33 NV (change=-0.15, p-trend=0.031) and DC (change=-1.0, p-trend=0.002) had  
34  
35 significant declining trends while MA (change=0.08, p-trend=0.001), Connecticut  
36  
37 (CT) (change=0.08, p-trend=0.023), OH (change=0.12, p-trend=0.006), DL  
38  
39 (change=0.37, p-trend<0.0001) and FL (change=0.15, p-trend=0.007) had  
40  
41 increasing homicide-FRF. A majority of the states had suicide-FRF-rates >5.80; CA  
42  
43 (change=-0.07, p-trend=0.009) and NC (change=-0.07, p-trend=0.037) had declining  
44  
45 trends. Unintentional-FRF-rates showed a significant decreasing trend in three  
46  
47 states, OH (change=-0.01, p-trend=0.022), Kentucky (KY) (change=-0.06, p-  
48  
49 trend=0.009), and Tennessee (TN) (change=-0.05, p-trend=0.002).

## DISCUSSION

National 11-year FRF-rate from 2000-2010 was 10.21, was almost three times higher than Switzerland and Finland.<sup>17</sup> There were four main observations that emerge from this analysis. First, while overall, blacks had higher national rates than whites and Hispanics had lower national rates than non-Hispanics, the 11-year FRF-rates declined among Hispanics and non-white non-black races with no significant change observed among whites, blacks or non-Hispanics. Second, a substantial inter-state heterogeneity was evidenced by 11-year state-specific FRF-rates being as low as 3.02 in HI to as high as 21.71 in DC. FL and MA recorded an upward FRF trend while AZ, CA, IL, MD, NV, NY, NC and DC had declining FRF-rates during the study period. Third, racial-ethnic variation was shown to drive many of the state-specific variations. Fourth, changes in different FRF-intent also drove many of the state-specific differences.

Firearm deaths increased from 28,663 in 2000 to 31,672 in 2010, about 30,509 deaths per year and no change in rate. These findings are similar to a report by the Bureau of Justice of a rapid decline in firearm homicides from 1993 to 1999 followed by a leveling of rates from 2000-2011.<sup>18</sup> Taken at face value, this endemic FRF-rate may seem reassuring, evidencing no increase in burden over time, concealing a substantial existing public health burden due to long-term cumulative burden to the country, as a whole surpasses the toll suffered during the 1980s epidemic stage.<sup>19</sup> During 2000-2011 there were 306,946 firearm related deaths. With the endemic annual FRF-rate of 10.3, US-population at 338 million by 2020<sup>20</sup>

1  
2  
3 and 10% decadal population increase, we estimate 336,778 firearm related deaths  
4  
5  
6 to occur between 2011 and 2020.  
7  
8  
9

10  
11 The 11-year FRF-rates we report among blacks was twice greater than that  
12  
13 of whites and six-times greater than that of other races is in line with reports  
14  
15 showing disproportionately larger firearm fatality and injury rates than whites and  
16  
17 other race.<sup>3 21 22</sup> Although there was a plateau of the national FRF-rates, rates among  
18  
19 Hispanics and non-white non-black races declined and may be explained by the lack  
20  
21 of access to firearms or low firearm ownership among Hispanics and other races.<sup>23</sup>  
22  
23 Our results explain the report where Hispanics were least likely to use firearms for  
24  
25 suicides albeit being more likely to self-injury than any other race groups.<sup>24</sup> Data  
26  
27 from 1981-2010 found that among youths a decline in homicide rates for blacks  
28  
29 between was significantly slower than the declines for Hispanics and other  
30  
31 racial/ethnic groups<sup>25</sup>, suggestive of lower crime.  
32  
33  
34  
35  
36  
37  
38  
39  
40  
41  
42  
43  
44  
45  
46  
47  
48  
49  
50  
51  
52  
53  
54  
55  
56  
57  
58  
59  
60

41 We found 41 states with no FRF-rate change, while 7 states and DC  
42  
43 demonstrated either a significant decline or increase. MA and FL recorded a  
44  
45 significant increase, MA with smallest and FL with largest annual increase while MA  
46  
47 had the lowest 11-year FRF-rate. The Brady Center to Prevent Gun Violence<sup>9</sup>  
48  
49 firearm legislative strength score for 2013, has MA to be third with score of 65  
50  
51 among all states in restrictive firearm legislation, while FL has a score of 3. After MA  
52  
53 passed the toughest firearm-control legislation in 1998, firearm ownership rates  
54  
55 plummeted but violent crimes (476.1 to 468.9) and homicides (2.2 to 3.3) rose.<sup>26</sup>  
56  
57  
58  
59  
60

1  
2  
3 The significant FRF-rate increase in MA may be due to the influx of firearms from  
4 the two neighboring states (Maine and New Hampshire) with weak firearm control  
5 legislation.<sup>27</sup> FL is a “shall issue”, weak legislature state with just 2 laws to prevent  
6 illegal gun-trafficking.<sup>27</sup> In contrast to the increasing FRF-rates, the aggregate  
7 violent crimes in FL declined from 801.1 to 542.9,<sup>28</sup> emphasizing a particularly  
8 concerning public health problem of increasing gun violence even in a climate of  
9 reducing violence.  
10  
11  
12  
13  
14  
15  
16  
17  
18  
19  
20  
21

22 CA, NY, IL, AZ, NV, MD, NC, and DC had declining trends but the most marked  
23 reduction was observed in CA and may be directly linked to strength of firearm  
24 legislature, a score of 81.<sup>9</sup> CA has eight state laws to prevent illegal gun trafficking<sup>27</sup>  
25 and a reduction in homicide crime rate in CA by 25.4% from 2001-2010.<sup>29</sup> An  
26 emergency department study from 2004-2008 reporting reduction of firearm death  
27 rate in CA echoing the results of our study.<sup>30</sup> NY and IL had similar trend profiles  
28 and an overall decline in FRF-rates, but the Brady scores were 62 and 35<sup>9</sup> with 10  
29 and 8 policies preventing illegal firearm trafficking respectively.<sup>27</sup> FRF-rate  
30 reduction in AZ and NV is in contrast to CA and NY, having no laws preventing illegal  
31 gun trafficking,<sup>27</sup> with Brady scores 0 and 5 respectively.<sup>9</sup> In AZ violent crime rate  
32 dropped from 544.5 offenses in 2002 to 372.2 in 2010,<sup>31 32</sup> and NV had reductions in  
33 index crimes.<sup>33</sup> This reduction and our results may be attributed to policing  
34 strategies.<sup>34</sup> Our reported reduction in firearm death rates in DC may be attributed  
35 to 9 laws preventing illegal gun trafficking.<sup>27</sup> Firearm policies are not stringent in  
36 NC, strength of firearm legislature being 16<sup>9</sup> with only 5 illegal gun trafficking  
37  
38  
39  
40  
41  
42  
43  
44  
45  
46  
47  
48  
49  
50  
51  
52  
53  
54  
55  
56  
57  
58  
59  
60

1  
2  
3 laws.<sup>27</sup> However, the violent crime rate in NC dropped from 493 to 363 from 2000-  
4  
5  
6 2010,<sup>35</sup> suggesting that the factors that led to reduction in crime rates may have also  
7  
8 driven FRF-rate reduction.  
9

10  
11  
12 We found that the state-specific increasing trend in FL was driven by an  
13  
14 increase among whites, blacks and non-Hispanics and can be explained by violent  
15  
16 crime rates in FL which ranks 4<sup>th</sup> in violent crime.<sup>36</sup> The racial gap in arrests for  
17  
18 major crimes widened in FL from 2000-2010: 6,175 blacks and 6,071 whites were  
19  
20 arrested in 2000 to 2,398 and 3,192 in 2010.<sup>37</sup> The increase in FRF-rates in MA  
21  
22 driven by whites and non-Hispanics is in contrast to the racial differences observed  
23  
24 in violent deaths with non-Hispanic blacks having the highest rate of 21.6 as  
25  
26 compared to 4.9 among whites.<sup>38</sup> MA has relatively low violent crime rate (ranks  
27  
28 20<sup>th</sup> in US),<sup>36</sup> and stringent firearm control.<sup>9</sup> Even though nationally no significant  
29  
30 reduction in FRF-rates among blacks was observed in our study, FRF-rates among  
31  
32 blacks drove the state-specific declines in AZ, NV, CA, NC and DC. Declining trends  
33  
34 among Hispanics in AZ, NV, CA, NY and IL contributing to state-specific declines may  
35  
36 be due to a combination of low firearm ownership<sup>23</sup> and racially targeted crime-  
37  
38 control activities.<sup>39</sup> In IN, KS, MN and OK, with no statewide reduction, the FRF-rates  
39  
40 fell solely among blacks, with no change among whites. These states have very few  
41  
42 laws to prevent firearm violence and trafficking<sup>27</sup> and rank among the highest  
43  
44  
45  
46  
47  
48  
49  
50  
51  
52  
53  
54  
55  
56  
57  
58  
59  
60 twenty states in crime rates except MN.<sup>36</sup>



1  
2  
3  
4  
5  
6  
7  
8  
9  
10  
11  
12  
13  
14  
15  
16  
17  
18  
19  
20  
21  
22  
23  
24  
25  
26  
27  
28  
29  
30  
31  
32  
33  
34  
35  
36  
37  
38  
39  
40  
41  
42  
43  
44  
45  
46  
47  
48  
49  
50  
51  
52  
53  
54  
55  
56  
57  
58  
59  
60

The increasing trend in FL and MA in our study was due to increase in firearm homicides. According to data from CDC, rates of suicides in FL remained constant from 2000-2010 while in MA these rates doubled from 1.92 to 3.15.<sup>1</sup> In 2010, 71% of homicides in FL were by firearms,<sup>28</sup> and in MA, 22% of the homicides were by firearm.<sup>38</sup> In CA, where all racial-ethnic groups revealing declining trends, was driven by reduction in suicide-FRF and is associated with the states' increased effort in implementing "The Mental Health Services Act" to reduce suicide rates.<sup>40</sup> In our study, reduction in homicides was caused by declines in AZ, IL, NV, NY, NC and DC. These declining patterns are similar to the reduction in all-cause homicide rates from 2000-2010 that occurred in a smaller magnitude among AZ, IL, NV, NY, NC and in a much larger magnitude in DC.<sup>1</sup>

32  
33  
34  
35  
36  
37  
38  
39  
40  
41  
42  
43  
44  
45  
46  
47  
48  
49  
50  
51  
52  
53  
54  
55  
56  
57  
58  
59  
60

There are several limitations in our study. Under reporting of firearm fatal events is a known phenomenon and a limitation of this study, which cannot be verified. There is, however, no reason to suspect that blacks and Hispanics are more likely than whites and non-Hispanic individuals to have a fatal firearm injury misclassified on the death certificate, so this under-reporting should not have biased our findings. Another limitation is that, despite the considerable state-specific heterogeneity, the actual variation in firearm mortality may be a feature of cities and counties with varying crime rates, and we do not address the variation existing at such level. Finally, comparisons made between other races may not be usefully interpreted due to the heterogeneity and the small frequency of events in this sub-

1  
2  
3 population. However, as other race makes up about 10% of the US population, the  
4  
5 results are discussed in relation to blacks and Hispanics.  
6  
7  
8  
9

10  
11 In summary, we showed no change in national firearm mortality rates during  
12  
13 2000-2010, but showed distinct state-specific patterns with racial/ethnic variation  
14  
15 and by intent. The patterns observed do not map neatly onto known firearm control  
16  
17 efforts by individual states. While some of the states with most stringent gun laws  
18  
19 showed an expected decrease in firearm death rates, some states with strong gun  
20  
21 control laws reported an increase in death rates. This may have a direct implication  
22  
23 for a public health approach to gun violence prevention that more broadly needs to  
24  
25 grapple with firearm available and porous cross-state borders that permit firearm  
26  
27 carriage across states. The distinctive state-specific firearm fatality profiles vary by  
28  
29 race, ethnicity and intent adding another layer of complexity to the FRF trends. This  
30  
31 calls for specific studies to identify the drivers of the state-specific temporal trends  
32  
33 followed by introducing tailored programs that target specific racial-ethnic groups  
34  
35 in specific states.  
36  
37  
38  
39  
40  
41  
42  
43  
44  
45  
46  
47  
48  
49  
50  
51  
52  
53  
54  
55  
56  
57  
58  
59  
60

**Table 1: Trends in firearm deaths in the United States, WISQARS 2000-2010.**

|                             | Age-adjusted firearm deaths per 100,000 population |       |       |       |       |       |       |       |       |       |       |       | Change  |                |       |         |
|-----------------------------|----------------------------------------------------|-------|-------|-------|-------|-------|-------|-------|-------|-------|-------|-------|---------|----------------|-------|---------|
|                             | 2000                                               | 2001  | 2002  | 2003  | 2004  | 2005  | 2006  | 2007  | 2008  | 2009  | 2010  | Total | Annual  | 95% CI         | SMD   | P-trend |
| All                         | 10.14                                              | 10.31 | 10.43 | 10.29 | 9.99  | 10.27 | 10.22 | 10.24 | 10.23 | 10.05 | 10.07 | 10.21 | -0.017  | -0.044, 0.010  | -0.44 | 0.181   |
| <b>Race</b>                 |                                                    |       |       |       |       |       |       |       |       |       |       |       |         |                |       |         |
| White                       | 8.97                                               | 9.21  | 9.19  | 9.05  | 8.84  | 8.98  | 8.80  | 8.98  | 9.18  | 9.13  | 9.20  | 9.05  | 0.006   | -0.027, 0.039  | 0.11  | 0.705   |
| Black                       | 18.30                                              | 18.32 | 19.22 | 19.01 | 18.31 | 19.34 | 19.98 | 19.31 | 18.19 | 17.15 | 16.90 | 18.51 | -0.114  | -0.311, 0.082  | -0.40 | 0.220   |
| Other                       | 4.76                                               | 3.89  | 4.19  | 4.03  | 3.70  | 3.88  | 3.83  | 3.38  | 3.25  | 3.37  | 3.25  | 3.38  | -0.121  | -0.166, -0.076 | -1.83 | <0.0001 |
| <b>Ethnicity</b>            |                                                    |       |       |       |       |       |       |       |       |       |       |       |         |                |       |         |
| Hispanic                    | 7.81                                               | 7.73  | 7.63  | 7.68  | 7.42  | 7.51  | 7.19  | 7.21  | 6.60  | 6.38  | 5.86  | 7.13  | -0.179  | -0.236, -0.122 | -2.13 | <0.0001 |
| Non-Hispanic                | 10.31                                              | 10.50 | 10.67 | 10.50 | 10.23 | 10.53 | 10.54 | 10.61 | 10.74 | 10.55 | 10.71 | 10.54 | 0.027   | -0.002, 0.056  | 0.63  | 0.068   |
| <b>Intent</b>               |                                                    |       |       |       |       |       |       |       |       |       |       |       |         |                |       |         |
| Homicide/Legal Intervention | 3.88                                               | 4.05  | 4.17  | 4.19  | 4.05  | 4.28  | 4.40  | 4.32  | 4.14  | 3.89  | 3.73  | 4.10  | -0.008  | -0.054, 0.038  | -0.12 | 0.705   |
| Suicide                     | 5.90                                               | 5.90  | 5.92  | 5.77  | 5.65  | 5.66  | 5.54  | 5.63  | 5.82  | 5.91  | 6.06  | 5.80  | 0.001   | -0.035, 0.038  | 0.03  | 0.932   |
| Undetermined                | 0.08                                               | 0.08  | 0.08  | 0.08  | 0.08  | 0.07  | 0.07  | 0.09  | 0.09  | 0.07  | 0.08  | 0.08  | -0.0001 | -0.002, 0.002  | -0.02 | 0.944   |
| Unintentional               | 0.27                                               | 0.28  | 0.26  | 0.25  | 0.22  | 0.27  | 0.21  | 0.20  | 0.19  | 0.18  | 0.20  | 0.23  | -0.010  | -0.014, -0.006 | -1.70 | <0.0001 |

All values are age-adjusted rates per 100,000 persons. Change denotes annual change in rate per 100,000. Negative value indicates decline in firearm death rates per 100,000 from 2000-2010 and positive value indicates increase in firearm death rate per 100,000 from 2000-2010. CI denotes confidence intervals of the annual change in firearm death rate per 100,000. SMD indicates standardized mean difference; is equal to annual change/standard deviation. P-trend calculated using meta-regression indicates the significance of the decline or the increase in firearm related death rates from 2000-2010. Data are from Center for Disease Control and Prevention (CDC)'s National center for Injury Prevention and Control Web-based Injury Statistics Query and Reporting System (WISQARS).

**CONTRIBUTORSHIP STATEMENT**

Galea and Kalesan conceived and supervised the study. Kalesan and Vasana completed the analyses. Kalesan, Galea and Villarreal led the writing. Fagan, Teperman, Mobily and Hlavacek assisted with the study and analyses. Hlavacek assisted with obtaining state gun laws.'

**COMPETING INTERESTS**

None

**DATA SHARING STATEMENT**

No additional data are available

**REFERENCES**

- 1
- 2
- 3
- 4
- 5
- 6 1. Centers for Disease Control and Prevention NCFIPaC. Web-based Injury Statistics Query and Reporting System (WISQARS). Atlanta, GA: National Center for Injury Prevention and Control, 2005.
- 7
- 8
- 9
- 10 2. Murphy SL, Jiaquan X, K.D. K. Deaths: Final Data for 2010. *National Vital Statistics Reports*, 2013:1-168.
- 11
- 12 3. Ikeda RM, Gorwitz R, James SP, Powell KE, Mercy JA. Trends in fatal firearm-related injuries, United States, 1962-1993. *American journal of preventive medicine* 1997;13(5):396-400.
- 13
- 14 4. Gotsch KE, Annest JL, Mercy JA, Ryan GW. Surveillance for Fatal and Nonfatal Firearm-Related Injuries --- United States, 1993--1998. *MMWR Surveill Summ* 2001;50:1-32.
- 15
- 16 5. Harris AR, Fisher GA, Thomas SH. Homicide as a medical outcome: racial disparity in deaths from assault in US Level I and II trauma centers. *The journal of trauma and acute care surgery* 2012;72(3):773-82.
- 17
- 18 6. Kellermann AL, Rivara FP, Rushforth NB, Banton JG, Reay DT, Francisco JT, et al. Gun Ownership as a Risk Factor for Homicide in the Home. *New England Journal of Medicine* 1993;329(15):1084-91.
- 19
- 20 7. Firearm injury in the U.S. PA: Firearm & Injury Center at Penn, 2011.
- 21
- 22 8. Fleegler EW, Lee LK, Monuteaux MC, Hemenway D, Mannix R. Firearm Legislation and Firearm-Related Fatalities in the United States. *Jama Intern Med* 2013;173(9):732-40.
- 23
- 24 9. 2013 State Scorecard. In: Violence BCtPGVaLcTPG, editor. *Score Card*. Washington, DC, 2013.
- 25
- 26 10. Phillips JA. Factors associated with temporal and spatial patterns in suicide rates across U.S. states, 1976-2000. *Demography* 2013;50(2):591-614.
- 27
- 28 11. Hoyert DL, Arias E, Smith B, Murphy SL, Kochanek KD. Deaths: Final Data for 1999. *National vital statistics reports*. Hyattsville, Maryland: National Center for Health Statistics, 2001.
- 29
- 30 12. Egger M, Smith GD, Altman D. *Systematic Reviews in Health Care: Meta-analysis in Context*. London: BMJ Books, 2001.
- 31
- 32 13. Higgins JP, Thompson SG. Quantifying heterogeneity in a meta-analysis. *Statistics in medicine* 2002;21(11):1539-58.
- 33
- 34 14. Higgins JP, Thompson SG, Deeks JJ, Altman DG. Measuring inconsistency in meta-analyses. *BMJ* 2003;327(7414):557-60.
- 35
- 36 15. Cohen J. A power primer. *Psychological bulletin* 1992;112(1):155-9.
- 37
- 38 16. Rosenthal R, Rubin DB. A simple, general purpose display of magnitude of experimental effect. *J Educ Psychol* 1982;74(2):166-69.
- 39
- 40 17. Bangalore S, Messerli FH. Gun Ownership and Firearm-related Deaths. *The American journal of medicine* 2013;126(10):873-6.
- 41
- 42 18. Planty M, Truman JL. Firearm Violence, 1993-2011. U.S. Department of Justice: Bureau of Justice Statistics, 2013.
- 43
- 44 19. Christoffel KK. Firearm injuries: epidemic then, endemic now. *American journal of public health* 2007;97(4):626-9.
- 45
- 46
- 47
- 48
- 49
- 50
- 51
- 52
- 53
- 54
- 55
- 56
- 57
- 58
- 59
- 60

- 1
- 2
- 3
- 4 20. Nygaard DF. World population projections, 2020. *A 2020 vision for food, agriculture and the environment*. Washington DC: International Food Policy Research Institute, 1994.
- 5
- 6
- 7 21. Cherry D, Annest JL, Mercy JA, Kresnow M, Pollock DA. Trends in nonfatal and
- 8 fatal firearm-related injury rates in the United States, 1985-1995. *Annals of*
- 9 *emergency medicine* 1998;32(1):51-9.
- 10
- 11 22. Kalesan B, French C, Fagan JA, Fowler DL, Galea S. Firearm-related
- 12 Hospitalizations and In-Hospital Mortality in the United States, 2000-2010.
- 13 *American journal of epidemiology* 2013.
- 14
- 15 23. Schwebel DC, Lewis T, Simon TR, Elliott MN, Toomey SL, Tortolero SR, et al.
- 16 Prevalence and Correlates of Firearm Ownership in the Homes of Fifth
- 17 Graders: Birmingham, AL, Houston, TX, and Los Angeles, CA. *Health education*
- 18 *& behavior : the official publication of the Society for Public Health Education*
- 19 2014.
- 20
- 21 24. Suicides and Self-Injury by Firearm. In: Bureau of Health Statistics and Research
- 22 DoH, editor. Pennsylvania: Pennsylvania Department of Health, 2006.
- 23
- 24 25. David-Ferdon C, Dahlberg LL, Kegler SR. Homicide rates among persons aged 10-
- 25 24 years - United States, 1981-2010. *MMWR. Morbidity and mortality weekly*
- 26 *report* 2013;62(27):545-8.
- 27
- 28 26. (NIBRS) NI-BRS. National Incident-Based Reporting System (NIBRS).
- 29 Commonwealth of Massachusetts, 2013.
- 30
- 31 27. Guns TT. Top Sources of Crime Guns in America, 2010.
- 32
- 33 28. Crime in Florida, Florida uniform crime report. In: (1992-2012). FSACF, editor.
- 34 Tallahassee, FL: Florida Statistical Analysis Center: FDLE, 2013.
- 35
- 36 29. Harris KD. Homicide in California 2010. California: California Department of
- 37 Justice, 2010.
- 38
- 39 30. Coyne-Beasley T, Lees AC. Fatal and nonfatal firearm injuries in North Carolina.
- 40 *North Carolina medical journal* 2010;71(6):565-8.
- 41
- 42 31. Halliday RC. Crime in Arizona 2002. *An annual report compiled by Access*
- 43 *Integrity Unit of the Arizona Department of Public Safety*. Phoenix, AZ: Arizona
- 44 Department of Public Safety, 2002.
- 45
- 46 32. Halliday RC. Crime in Arizona 2010. *An annual report compiled by Access*
- 47 *Integrity Unit of the Arizona Department of Public Safety*. Phoenix, AZ: Arizona
- 48 Department of Public Safety, 2010.
- 49
- 50 33. Crime in Nevada 2010. In: Safety NDoP, editor. *Crime in Nevada: State of Nevada,*
- 51 *Department of Public Safety, 2012.*
- 52
- 53 34. Assistance BoJ. Reducing Crime Through Intelligence-Led Policing. Washington,
- 54 D.C: Office of Justice Programs, US Department of Justice, 2012:24-26.
- 55
- 56 35. Medlin L, Davis J. Scorecard on Crime and Justice in North Carolina: Criminal
- 57 Justice Analysis Center, 2012.
- 58
- 59 36. Crime in the United States, 2006. Retrieved (April 14, 2014), from
- 60 <http://www.fbi.gov/about-us/cjis/ucr/crime-in-the-u.s/2006>. In: United States Department of Justice FBoI, editor, 2007.
37. Part I and II Arrests for Florida by Age, Sex, and Race. *Annual Crime in Florida*. FL: Florida Department of Law Enforcement, 2012.

- 1
- 2
- 3
- 4 38. Violent Deaths in Massachusetts: Surveillance Update 2010: Massachusetts
- 5 Department of Public Health, 2013.
- 6 39. J.M S. Maintaining racial inequality through crime control: mass incarceration
- 7 and residential segregation. *Contemp Justice Review* 2012;15(4):469-84.
- 8 40. Clark W, Welch SN, Berry SH, Collentine AM, Collins R, Lebron D, et al.
- 9 California's historic effort to reduce the stigma of mental illness: the Mental
- 10 Health Services Act. *American journal of public health* 2013;103(5):786-94.
- 11
- 12
- 13
- 14
- 15
- 16
- 17
- 18
- 19
- 20
- 21
- 22
- 23
- 24
- 25
- 26
- 27
- 28
- 29
- 30
- 31
- 32
- 33
- 34
- 35
- 36
- 37
- 38
- 39
- 40
- 41
- 42
- 43
- 44
- 45
- 46
- 47
- 48
- 49
- 50
- 51
- 52
- 53
- 54
- 55
- 56
- 57
- 58
- 59
- 60

For peer review only

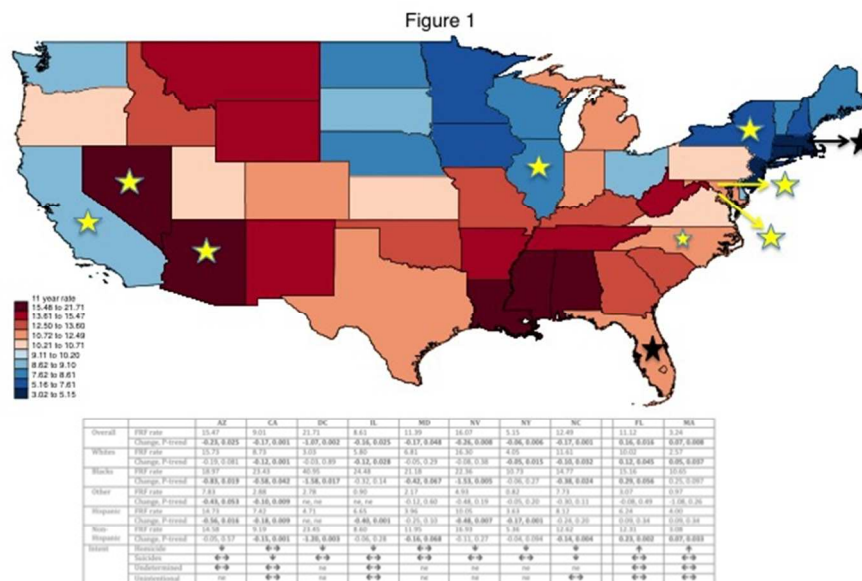

Figure 1: Firearm related fatality rates from 2000-2010.

Firearm related fatality rates are 11-year cumulative age-adjusted rates per 100,000 persons from 2000 to 2010 for each of the 50 states and District of Columbia ranging from 3.02 (HI) to 21.71 (DC) per 100,000. The colors represent increasing rates from blue to red. Significant decline in 7 states (AZ, CA, IL, MD, NV, NY and NC and DC) are represented as gold stars and significant increase in FL and MA as black stars within the map and in the table.

The table summarizes the rates per 100,000, annual change in rate and p-trend for those states that show significant increase or decrease. "FRF" denotes firearm related fatality. "Change" indicates the annual change in rates from 2000 to 2010. "P-trend" indicates the significance of the decline or the increase in firearm related fatality rates from 2000 to 2010 and was calculated using meta-regression. Negative values for change indicate a decrease while positive values indicate increase in rates across the years. The intent-specific rates of firearm related fatality is denoted with arrows in the table below: downward arrow denotes reduction in rates, upward arrows indicate an increase and two-way arrows indicate no change. "ne" represents data which cannot be estimated due to frequency <10. HI (11-year=3.02, change=-0.057, p-trend=0.36) and AK (11-year=18.09, change=0.10, p-trend=0.64) are not represented in the map.

254x190mm (72 x 72 DPI)



Figure 2

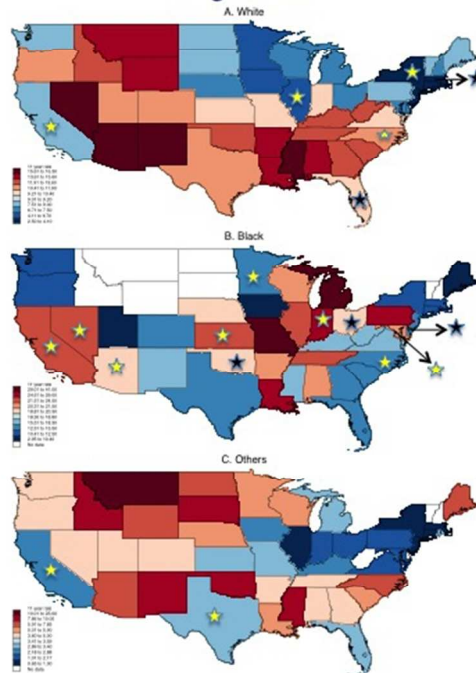

Figure 2: Firearm related fatality rates from 2000-2010 according to race.

## Whites:

Firearm related fatality rates are 11-year cumulative age-adjusted rates per 100,000 persons from 2000 to 2010 for each of the 50 states and District of Columbia; ranging from 2.57 (MA) to 16.30 (NV) per 100,000.

The colors represent increasing rates from blue to red. White represents no data or states where the frequency was <10 among whites. Significant decline in 4 states (CA, NY, IL and NC) are represented as gold stars and significant increase in MA and FL as black stars. HI (11-year=4.29, change=0.03, p-trend=0.84) and AK (11-year=15.77, change=0.15, p-trend=0.56) are not represented in the map.

## Blacks:

Firearm related fatality rates are 11-year cumulative age-adjusted rates per 100,000 persons from 2000 to 2010 for each of the 50 states and District of Columbia; ranging from 2.93 (HI) to 40.95 (DC) per 100,000.

The colors represent increasing rates from blue to red. White represents no data or states where the frequency was <10 among blacks. Significant decline in 8 states (CA, NV, AZ, KA, MN, IN, NC and DC) are represented as gold stars and significant increase in OK, OH and DL as black stars. HI (11-year=2.93) and AK (11-year=12.36) are not represented in the map.

## Other race:

Firearm related fatality rates are 11-year cumulative age-adjusted rates per 100,000 persons from 2000 to 2010 for each of the 50 states and District of Columbia; ranging from 0.82 (NY) to 22.54 (AK) per 100,000.

The colors represent increasing rates from blue to red. White represents no data or states where the frequency was <10 among other race. Significant decline in 2 states (CA and TX) are represented as gold stars and there were no states with significant increase. HI (11-year=2.18, change=-0.04, p-trend=0.50) and AK (11-year=22.54, change=-0.15, p-trend=0.75) are not represented in the map.

254x190mm (72 x 72 DPI)

Figure 3

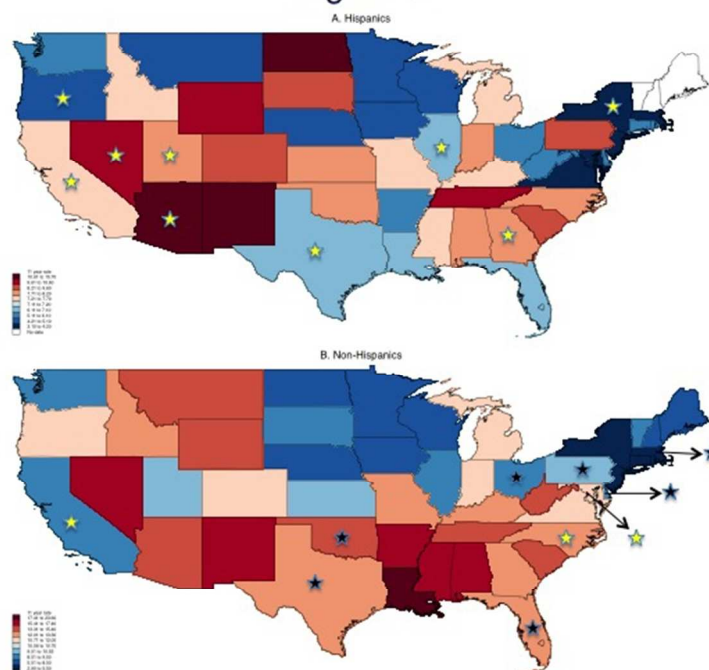

Figure 3: Firearm related fatality rates from 2000-2010 according to ethnicity.

#### Hispanic:

Firearm related fatality rates are 11-year cumulative age-adjusted rates per 100,000 persons from 2000 to 2010 for each of the 50 states and District of Columbia; ranging from 3.13 (NJ) to 15.63 (ND) per 100,000.

The colors represent increasing rates from blue to red. White represents no data or states where the frequency was <10 among Hispanics. Significant decline in 9 states (CA, AZ, NV, OR, UT, TX, IL, GA and NY) are represented as gold stars and there were no states with significant increase. HI (11-year=3.84) and AK (11-year=8.95) are not represented in the map.

#### Non-Hispanic:

Firearm related fatality rates are 11-year cumulative age-adjusted rates per 100,000 persons from 2000 to 2010 for each of the 50 states and District of Columbia; ranging from 2.95 (HI) to 23.45 (DC) per 100,000.

The colors represent increasing rates from blue to red. White represents no data or states where the frequency was <10 among non-Hispanics. Significant decline in 3 states (CA, NC and DC) are represented as gold stars and significant increase in 7 states (TX, OK, FL, OH, PA, DL, and MA) as black stars. HI (11-year=2.95, change=-0.05, p-trend=0.50) and AK (11-year=18.44, change=0.13, p-trend=0.57) are not represented in the map.

254x190mm (72 x 72 DPI)

Figure 4

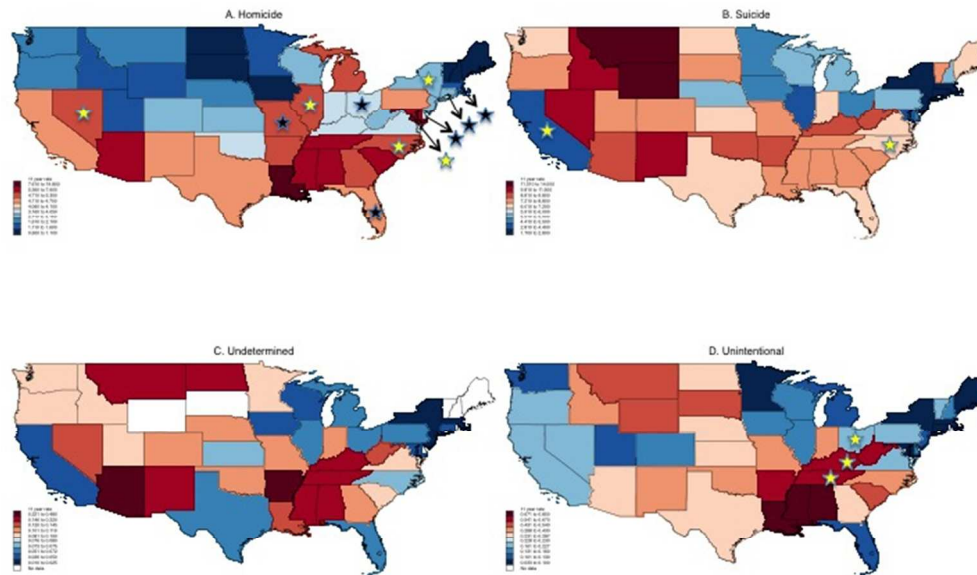

Figure 4: Firearm related fatality rates from 2000-2010 according to intent.

#### Homicide:

Firearm related fatality rates are 11-year cumulative age-adjusted rates per 100,000 persons from 2000 to 2010 for each of the 50 states and District of Columbia; ranging from 0.65 (NH) to 19.75 (DC) per 100,000.

The colors represent increasing rates from blue to red. White represents no data or states where the frequency was <10. Significant decline in 5 states (NV, IL, NC, NY and DC) are represented as gold stars and significant increase in MO, FL, OH, MA, CT, and DL as black stars. HI (11-year=0.79, change=-0.01, p-trend=0.68) and AK (11-year=3.54, change=0.001, p-trend=0.95) are not represented in the map.

#### Suicide:

Firearm related fatality rates are 11-year cumulative age-adjusted rates per 100,000 persons from 2000 to 2010 for each of the 50 states and District of Columbia; ranging from 1.61 (MA) to 13.79 (AK) per 100,000.

The colors represent increasing rates from blue to red. White represents no data or states where the frequency was <10. Significant decline in 2 states (CA and NC) are represented as gold stars and there were no states with significant increase. HI (11-year=2.10, change=-0.001, p-trend=0.95) and AK (11-year=13.79, change=0.11, p-trend=0.61) are not represented in the map.

#### Undetermined:

Firearm related fatality rates are 11-year cumulative age-adjusted rates per 100,000 persons from 2000 to 2010 for each of the 50 states and District of Columbia; ranging from 0.01 (NJ) to 0.47 (AK) per 100,000.

The colors represent increasing rates from blue to red. White represents no data or states where the frequency was <10. There was no significant decline or increasing state-specific trends. HI (11-year=ne) and AK (11-year=0.47) are not represented in the map.

#### Unintentional:

Firearm related fatality rates are 11-year cumulative age-adjusted rates per 100,000 persons from 2000 to 2010 for each of the 50 states and District of Columbia; ranging from 0.04 (MA) to 0.83 (LO) per 100,000.

The colors represent increasing rates from blue to red. White represents no data or states where the frequency was <10. Significant decline in 3 states (OH, KN and TN) are represented as gold stars and there

1  
2  
3  
4  
5  
6  
7  
8  
9  
10  
11  
12  
13  
14  
15  
16  
17  
18  
19  
20  
21  
22  
23  
24  
25  
26  
27  
28  
29  
30  
31  
32  
33  
34  
35  
36  
37  
38  
39  
40  
41  
42  
43  
44  
45  
46  
47  
48  
49  
50  
51  
52  
53  
54  
55  
56  
57  
58  
59  
60

were no states with significant increase. HI (11-year=0.08) and AK (11-year=0.29) are not represented in the map.

254x190mm (72 x 72 DPI)

For peer review only

**Supplementary Table 1: Firearm related trends in death, annual rate of change in death, lives lost and saved in the United States by states, WISQARS 2000 to 2010.**

|                  | Age-adjusted firearm deaths per 100,000 population |       |       |       |       |       |       |       |       |       |       |       | Change in rate |                |         | Lives lost/ saved (-) |          |
|------------------|----------------------------------------------------|-------|-------|-------|-------|-------|-------|-------|-------|-------|-------|-------|----------------|----------------|---------|-----------------------|----------|
|                  | 2000                                               | 2001  | 2002  | 2003  | 2004  | 2005  | 2006  | 2007  | 2008  | 2009  | 2010  | Total | Annual         | 95% CI         | P-trend | 11 years              | Per year |
| All              | 10.14                                              | 10.31 | 10.43 | 10.29 | 9.99  | 10.27 | 10.22 | 10.24 | 10.23 | 10.05 | 10.07 | 10.21 | -0.17          | -0.044, 0.010  | 0.181   | -5527.8               | -502.5   |
| <b>Northeast</b> |                                                    |       |       |       |       |       |       |       |       |       |       |       |                |                |         |                       |          |
| Massachusetts    | 2.73                                               | 3.00  | 3.13  | 3.09  | 3.16  | 3.42  | 3.22  | 3.55  | 3.34  | 3.1   | 4.03  | 3.24  | 0.074          | 0.025, 0.122   | 0.008   | 52.4                  | 4.8      |
| Rhode Island     | 5.10                                               | 4.30  | 5.14  | 3.12  | 3.61  | 3.60  | 4.21  | 3.40  | 3.94  | 5.02  | 4.60  | 4.18  | -0.013         | -0.180, 0.155  | 0.869   | -1.5                  | -0.1     |
| New Jersey       | 4.11                                               | 4.44  | 4.88  | 5.42  | 5.37  | 5.15  | 5.82  | 5.25  | 4.94  | 4.70  | 5.20  | 5.03  | 0.063          | -0.035, 0.161  | 0.182   | 59.8                  | 5.4      |
| Connecticut      | 5.32                                               | 5.63  | 4.32  | 4.37  | 5.00  | 5.34  | 4.99  | 4.15  | 5.60  | 4.90  | 5.85  | 5.04  | 0.028          | -0.103, 0.159  | 0.637   | 10.8                  | 1.0      |
| New York         | 5.70                                               | 5.54  | 5.13  | 5.32  | 4.88  | 5.21  | 5.14  | 5.04  | 4.90  | 4.79  | 5.07  | 5.15  | -0.064         | -0.104, -0.023 | 0.006   | -134.9                | -12.3    |
| New Hampshire    | 6.27                                               | 7.23  | 5.91  | 6.8   | 5.02  | 6.62  | 6.22  | 5.56  | 6.86  | 6.34  | 8.22  | 6.49  | 0.065          | -0.126, 0.255  | 0.461   | 9.2                   | 0.8      |
| Maine            | 8.55                                               | 7.29  | 6.63  | 6.02  | 7.9   | 7.71  | 7.28  | 7.61  | 8.42  | 8.58  | 7.86  | 7.61  | 0.100          | -0.077, 0.277  | 0.232   | 14.4                  | 1.3      |
| Vermont          | 8.74                                               | 8.20  | 9.74  | 7.58  | 9.41  | 6.79  | 8.14  | 8.08  | 8.19  | 8.72  | 10.21 | 8.53  | 0.037          | -0.222, 0.296  | 0.753   | 2.5                   | 0.2      |
| Pennsylvania     | 10.15                                              | 9.53  | 9.96  | 9.87  | 10.2  | 10.76 | 10.9  | 10.52 | 10.53 | 10.41 | 10.11 | 10.27 | 0.064          | -0.014, 0.142  | 0.095   | 87.8                  | 8.0      |
| <b>Midwest</b>   |                                                    |       |       |       |       |       |       |       |       |       |       |       |                |                |         |                       |          |
| Iowa             | 6.46                                               | 6.37  | 6.73  | 6.94  | 6.45  | 6.71  | 6.34  | 4.99  | 7.25  | 6.23  | 6.8   | 6.5   | -0.017         | -0.157, 0.124  | 0.796   | -5.6                  | -0.5     |
| Minnesota        | 6.34                                               | 6.49  | 6.06  | 6.5   | 7.04  | 6.94  | 6.3   | 6.48  | 6.97  | 6.17  | 6.76  | 6.57  | 0.024          | -0.053, 0.101  | 0.495   | 13.5                  | 1.2      |
| Nebraska         | 9.77                                               | 8.12  | 8.05  | 7.64  | 6.71  | 7.67  | 7.69  | 7.95  | 8.27  | 7.26  | 8.16  | 7.94  | -0.071         | -0.231, 0.090  | 0.346   | -13.8                 | -1.3     |
| Wisconsin        | 7.99                                               | 8.70  | 8.08  | 8.44  | 7.37  | 8.48  | 7.56  | 8.54  | 7.72  | 7.91  | 8.57  | 8.14  | -0.008         | -0.113, 0.096  | 0.859   | -4.9                  | -0.4     |
| North Dakota     | 6.6                                                | 7.6   | 9.12  | 8.83  | 7.5   | 8.9   | 6.62  | 8.27  | 8.51  | 8.92  | 9.56  | 8.23  | 0.155          | -0.086, 0.395  | 0.180   | 11.1                  | 1.0      |
| Illinois         | 9.00                                               | 10.21 | 9.69  | 9.01  | 7.8   | 8.01  | 8.08  | 8.03  | 8.55  | 8.17  | 8.19  | 8.61  | -0.155         | -0.286, -0.025 | 0.025   | -215.3                | -19.6    |
| South Dakota     | 7.47                                               | 7.1   | 7.91  | 9.86  | 9.97  | 10.2  | 9.74  | 6.14  | 10.5  | 9.31  | 9.23  | 8.89  | 0.157          | -0.168, 0.481  | 0.304   | 13.5                  | 1.2      |
| Ohio             | 7.81                                               | 9.00  | 9.31  | 8.12  | 8.97  | 9.63  | 9.66  | 9.55  | 9.67  | 8.5   | 9.95  | 9.1   | 0.122          | -0.010, 0.253  | 0.066   | 153.8                 | 14.0     |
| Kansas           | 11.15                                              | 9.93  | 9.7   | 11.13 | 10.73 | 9.25  | 10.84 | 10.35 | 9.7   | 10.76 | 10.44 | 10.37 | -0.012         | -0.158, 0.135  | 0.860   | -3.6                  | -0.3     |
| Michigan         | 10.83                                              | 10.83 | 10.99 | 10.33 | 10.52 | 10.78 | 11.53 | 11.03 | 10.96 | 11.07 | 10.98 | 10.9  | 0.037          | -0.034, 0.109  | 0.271   | 40.6                  | 3.7      |
| Indiana          | 10.88                                              | 11.82 | 11.68 | 11.19 | 10.22 | 11.11 | 11.63 | 10.5  | 11.24 | 11.33 | 10.82 | 11.13 | -0.031         | -0.143, 0.081  | 0.546   | -21.4                 | -1.9     |
| Missouri         | 13.24                                              | 13.14 | 12.21 | 11.42 | 11.44 | 12.9  | 13    | 12.79 | 13.74 | 13.71 | 13.93 | 12.88 | 0.135          | -0.036, 0.306  | 0.108   | 86.1                  | 7.8      |

1  
2  
3  
4  
5  
6  
7  
8  
9  
10  
11  
12  
13  
14  
15  
16  
17  
18  
19  
20  
21  
22  
23  
24  
25  
26  
27  
28  
29  
30  
31  
32  
33  
34  
35  
36  
37  
38  
39  
40  
41  
42  
43  
44  
45  
46  
47  
48  
49

| South                |       |       |       |       |       |       |       |       |       |       |       |       |        |                |       |        |       |
|----------------------|-------|-------|-------|-------|-------|-------|-------|-------|-------|-------|-------|-------|--------|----------------|-------|--------|-------|
| Delaware             | 6.66  | 9.47  | 9.07  | 7.86  | 8.78  | 8.78  | 9.19  | 8.91  | 10.65 | 8.76  | 9.88  | 8.89  | 0.201  | -0.018, 0.419  | 0.067 | 18.7   | 1.7   |
| Virginia             | 11.13 | 10.61 | 11.01 | 10.86 | 10.81 | 11.48 | 10.36 | 10.4  | 10.18 | 10.28 | 10.69 | 10.71 | -0.068 | -0.149, 0.014  | 0.092 | -56.6  | -5.1  |
| Texas                | 10.57 | 11.22 | 10.83 | 11.21 | 10.66 | 11.09 | 10.47 | 10.89 | 10.83 | 10.98 | 10.93 | 10.89 | 0.001  | -0.054, 0.056  | 0.976 | 2.5    | 0.2   |
| Florida              | 10.19 | 10.68 | 10.97 | 11.05 | 10.46 | 9.95  | 11.05 | 12.02 | 12.18 | 11.98 | 11.44 | 11.12 | 0.160  | 0.038, 0.282   | 0.016 | 310.1  | 28.2  |
| Maryland             | 11.91 | 11.46 | 11.54 | 11.96 | 11.93 | 11.86 | 12.1  | 12.04 | 11.61 | 10.19 | 9.26  | 11.39 | -0.169 | -0.335, -0.002 | 0.048 | -103.5 | -9.4  |
| North Carolina       | 13.56 | 13.06 | 13.43 | 12.35 | 12.21 | 12.74 | 12.55 | 12.17 | 12.31 | 11.59 | 11.57 | 12.49 | -0.174 | -0.255, -0.092 | 0.001 | -168.1 | -15.3 |
| Georgia              | 13.4  | 13.44 | 13.39 | 13.72 | 12.16 | 12.05 | 12.54 | 13.4  | 12.43 | 13.06 | 12.62 | 12.92 | -0.076 | -0.197, 0.045  | 0.189 | -75.0  | -6.8  |
| Kentucky             | 13.25 | 12.69 | 13.04 | 13.38 | 13.04 | 12.94 | 12.47 | 14.11 | 13.28 | 12.78 | 12.48 | 13.05 | -0.020 | -0.140, 0.010  | 0.713 | -9.2   | -0.8  |
| Oklahoma             | 13.21 | 14.01 | 12.81 | 12.77 | 12.86 | 13.15 | 13.26 | 13.18 | 13.91 | 14.33 | 14.31 | 13.45 | 0.105  | -0.028, 0.238  | 0.108 | 41.3   | 3.8   |
| South Carolina       | 12.42 | 13.72 | 13.69 | 14.17 | 13.5  | 13.75 | 13.88 | 13.09 | 13.17 | 13.52 | 13.92 | 13.55 | 0.032  | -0.088, 0.152  | 0.561 | 15.2   | 1.4   |
| West Virginia        | 12.99 | 13.15 | 14.67 | 14.01 | 13.6  | 13.72 | 13.32 | 14.06 | 12.66 | 13.21 | 14.23 | 13.6  | 0.002  | -0.183, 0.188  | 0.978 | 0.4    | 0.0   |
| Tennessee            | 15.63 | 14.47 | 15.4  | 14.11 | 14.54 | 16.03 | 15.3  | 14.74 | 15.46 | 15.06 | 14.42 | 15.03 | -0.013 | -0.148, 0.123  | 0.837 | -8.6   | -0.8  |
| Arkansas             | 15.42 | 15.27 | 16.29 | 14.96 | 14.65 | 15.62 | 15.12 | 15.09 | 15.6  | 16.03 | 14.39 | 15.31 | -0.033 | -0.193, 0.126  | 0.648 | -10.1  | -0.9  |
| Alabama              | 17.14 | 16.41 | 16.08 | 16.8  | 14.79 | 15.99 | 16.7  | 17.24 | 17.31 | 17.18 | 16.18 | 16.53 | 0.045  | -0.128, 0.217  | 0.574 | 22.8   | 2.1   |
| Mississippi          | 16.56 | 17.64 | 17.34 | 16.81 | 16.41 | 15.98 | 16.54 | 18.28 | 19.25 | 16.65 | 16.05 | 17.06 | 0.015  | -0.209, 0.239  | 0.883 | 4.8    | 0.4   |
| Louisiana            | 17.58 | 17.46 | 19.31 | 18.61 | 19.52 | 18.35 | 19.02 | 19.77 | 18.34 | 18.03 | 19.11 | 18.62 | 0.082  | -0.081, 0.244  | 0.286 | 40.4   | 3.7   |
| District of Columbia | 22.24 | 25.46 | 29.79 | 25.71 | 22.64 | 23.47 | 19.99 | 21.66 | 20.01 | 15.96 | 14.62 | 21.71 | -1.067 | -1.621, -0.512 | 0.002 | -67.7  | -6.2  |
| West                 |       |       |       |       |       |       |       |       |       |       |       |       |        |                |       |        |       |
| Hawaii               | 4.2   | 3.74  | 2.82  | 2.88  | 3.1   | 2.14  | 2.38  | 2.44  | 3.04  | 3.34  | 3.21  | 3.02  | -0.057 | -0.190, 0.076  | 0.359 | -8.1   | -0.7  |
| Washington           | 8.94  | 8.53  | 9.34  | 9.17  | 9.17  | 8.8   | 8.37  | 8.32  | 8.69  | 9.14  | 8.92  | 8.85  | -0.018 | -0.099, 0.063  | 0.623 | -12.5  | -1.1  |
| California           | 9.27  | 9.31  | 9.75  | 9.78  | 9.24  | 9.52  | 9.15  | 8.84  | 8.5   | 8.17  | 7.7   | 9.01  | -0.166 | -0.249, -0.083 | 0.001 | -652.3 | -59.3 |
| Utah                 | 9.93  | 10.99 | 9.6   | 10.51 | 10.13 | 9.91  | 9.75  | 10.63 | 9.68  | 10.46 | 12.16 | 10.39 | 0.081  | -0.077, 0.240  | 0.276 | 22.1   | 2.0   |
| Oregon               | 10.81 | 10.16 | 10.49 | 10.72 | 10.36 | 10.68 | 10.16 | 9.91  | 9.73  | 10.31 | 11.33 | 10.44 | -0.011 | -0.127, 0.106  | 0.839 | -4.4   | -0.4  |
| Colorado             | 10.36 | 11.68 | 11.47 | 11.13 | 11.96 | 11.53 | 10.33 | 10.38 | 10.39 | 11.58 | 10.72 | 11.05 | -0.045 | -0.183, 0.092  | 0.474 | -23.1  | -2.1  |
| Idaho                | 10.19 | 13.5  | 12.42 | 12.33 | 13.04 | 13.94 | 12.69 | 12.75 | 11.4  | 12.85 | 12.73 | 12.56 | 0.077  | -0.148, 0.302  | 0.459 | 12.1   | 1.1   |
| Wyoming              | 11.72 | 13.91 | 18.87 | 17.46 | 11.15 | 13.39 | 14.85 | 14.66 | 16.91 | 17.59 | 15.54 | 15.09 | 0.267  | -0.257, 0.791  | 0.279 | 15.3   | 1.4   |
| Montana              | 14.85 | 17.77 | 14.61 | 15.68 | 13.05 | 16.85 | 12.25 | 13.54 | 15.73 | 16.04 | 15.56 | 15.11 | -0.040 | -0.420, 0.341  | 0.819 | -4.2   | -0.4  |

1  
2  
3  
4  
5  
6  
7  
8  
9  
10  
11  
12  
13  
14  
15  
16  
17  
18  
19  
20  
21  
22  
23  
24  
25  
26  
27  
28  
29  
30  
31  
32  
33  
34  
35  
36  
37  
38  
39  
40  
41  
42  
43  
44  
45  
46  
47  
48  
49

|            |       |       |       |       |       |       |       |       |       |       |       |       |        |                |       |        |       |
|------------|-------|-------|-------|-------|-------|-------|-------|-------|-------|-------|-------|-------|--------|----------------|-------|--------|-------|
| New Mexico | 16.08 | 15.26 | 16.61 | 17.55 | 15.15 | 13.89 | 14.45 | 14.85 | 14.68 | 14.48 | 14.84 | 15.23 | -0.184 | -0.376, 0.008  | 0.058 | -39.2  | -3.6  |
| Arizona    | 15.58 | 15.92 | 17.89 | 15.29 | 15.84 | 16    | 16.22 | 15.38 | 14.36 | 13.49 | 14.53 | 15.47 | -0.230 | -0.423, -0.036 | 0.025 | -147.2 | -13.4 |
| Nevada     | 17.26 | 16.54 | 17.06 | 17.04 | 16.74 | 16.09 | 16.3  | 15.87 | 15.15 | 15.11 | 14.49 | 16.07 | -0.264 | -0.441, -0.086 | 0.008 | -69.9  | -6.4  |
| Alaska     | 17.96 | 14.83 | 19.89 | 19.24 | 17.51 | 17.47 | 16.94 | 18.22 | 20.92 | 14.68 | 20.51 | 18.09 | 0.102  | -0.375, 0.580  | 0.639 | 7.5    | 0.7   |

All values are age-adjusted rates per 100,000 population.  
 Change denotes annual change in rate per 100,000. Negative value indicates decline in firearm death rates per 100,000 from 2000 to 2010 and positive value indicates increase in firearm death rate per 100,000 from 2000 to 2010.  
 CI denotes confidence intervals of the annual change in firearm death rate per 100,000.  
 P-trend calculated using meta-regression indicates the significance of the decline or the increase in firearm related death rates from 2000 to 2010.  
 Lives lost or saved are calculated by applying annual change to the total 11-year population from 2000 to 2010. The annual lives lost or saved are the total/ 11 years. Negative denotes lives saved and positive values are lives lost.  
 Data are from Center for Disease Control and Prevention (CDC)'s National center for Injury Prevention and Control Web-based Injury Statistics Query and Reporting System (WISQARS).

Peer review only

1  
2  
3  
4  
5  
6  
7  
8  
9  
10  
11  
12  
13  
14  
15  
16  
17  
18  
19  
20  
21  
22  
23  
24  
25  
26  
27  
28  
29  
30  
31  
32  
33  
34  
35  
36  
37  
38  
39  
40  
41  
42  
43  
44  
45  
46  
47  
48  
49

**Supplementary Table 2: US states with significant racial and ethnic trends within firearm fatality rates**

|              |               | GA           | IN           | KA           | MN           | OK           | OR           | PA           | TX           | UT           |
|--------------|---------------|--------------|--------------|--------------|--------------|--------------|--------------|--------------|--------------|--------------|
| Overall      | FRF rate      | 12.92        | 11.13        | 10.37        | 6.57         | 13.45        | 10.44        | 10.27        | 10.89        | 10.39        |
|              | Change        | -0.08        | -0.03        | -0.01        | 0.02         | 0.11         | -0.01        | 0.06         | 0.001        | 0.08         |
|              | P-trend       | 0.19         | 0.55         | 0.86         | 0.49         | 0.11         | 0.84         | 0.095        | 0.98         | 0.28         |
| Whites       | FRF rate      | 12.16        | 9.25         | 9.46         | 6.04         | 12.94        | 10.64        | 7.84         | 10.81        | 10.66        |
|              | Change        | -0.07        | 0.01         | 0.07         | 0.06         | -0.02        | 0.01         | 0.06         | 0.03         | 0.08         |
|              | P-trend       | 0.36         | 0.77         | 0.38         | 0.12         | 0.74         | 0.89         | 0.076        | 0.45         | 0.34         |
|              | Pop % change  | -3.8         | -2.0         | -1.7         | -3.3         | -2.2         | -2.0         | -2.6         | -2.3         | -1.4         |
| Blacks       | FRF rate      | 14.05        | 28.92        | 24.14        | 13.52        | 20.04        | 11.47        | 27.48        | 13.37        | 7.73         |
|              | Change        | -0.06        | <b>-0.66</b> | <b>-1.07</b> | <b>-0.61</b> | <b>0.93</b>  | -0.67        | -0.14        | -0.09        | ne           |
|              | P-trend       | 0.57         | <b>0.012</b> | <b>0.021</b> | <b>0.038</b> | <b>0.008</b> | 0.23         | 0.59         | 0.60         | ne           |
|              | Pop % change  | 2.3          | 1.2          | 0.6          | 1.9          | 0.4          | 0.4          | 1.3          | 0.6          | 0.5          |
| Other        | FRF rate      | 4.89         | 2.01         | 3.36         | 5.23         | 9.11         | 4.49         | 2.12         | 3.21         | 4.59         |
|              | Change        | -0.32        | ne           | ne           | -0.35        | <b>0.37</b>  | -0.07        | -0.20        | <b>-0.19</b> | ne           |
|              | P-trend       | 0.089        | ne           | ne           | 0.18         | <b>0.062</b> | 0.70         | 0.35         | <b>0.033</b> | ne           |
|              | Pop % change  | 1.5          | 0.8          | 1.0          | 1.4          | 1.8          | 1.5          | 1.2          | 1.7          | 0.9          |
| Hispanic     | FRF rate      | 8.02         | 8.19         | 8.05         | 4.65         | 7.92         | 4.83         | 9.11         | 7.04         | 7.88         |
|              | Change        | <b>-0.54</b> | -0.18        | -0.15        | -0.48        | -0.26        | <b>-0.33</b> | <b>-0.39</b> | <b>-0.21</b> | <b>-0.79</b> |
|              | P-trend       | <b>0.012</b> | 0.33         | 0.49         | 0.31         | 0.21         | <b>0.037</b> | <b>0.065</b> | <b>0.004</b> | <b>0.030</b> |
|              | Pop % change  | 3.5          | 2.5          | 3.5          | 1.8          | 3.7          | 3.7          | 2.5          | 5.6          | 3.9          |
| Non-Hispanic | FRF rate      | 13.15        | 11.18        | 10.38        | 6.60         | 13.73        | 10.76        | 10.25        | 12.28        | 10.53        |
|              | Change        | -0.02        | -0.04        | 0.01         | 0.05         | <b>0.15</b>  | 0.03         | <b>0.08</b>  | <b>0.14</b>  | <b>-0.15</b> |
|              | P-trend       | 0.73         | 0.45         | 0.91         | 0.21         | <b>0.045</b> | 0.56         | <b>0.039</b> | <b>0.022</b> | <b>0.001</b> |
|              | Pop % change  | -3.5         | -2.5         | -3.5         | -1.8         | -3.7         | -3.7         | -2.5         | -5.6         | -3.9         |
| Intent       | Homicide      | ↔            | ↔            | ↔            | ↔            | ↔            | ↔            | ↔            | ↔            | ↔            |
|              | Suicides      | ↔            | ↔            | ↔            | ↔            | ↔            | ↔            | ↔            | ↔            | ↔            |
|              | Undetermined  | ↔            | ne           | ne           | ne           | ne           | ne           | ↔            | ↔            | ne           |
|              | Unintentional | ↔            | ↔            | ↔            | ne           | ↔            | ne           | ↔            | ↔            | ne           |

FRF: firearm related fatality, Pop % change: change in population percentage from 2000 to 2010. All values are age-adjusted rates per 100,000 population. Change denotes annual change in rate per 100,000. Negative value indicates decline in firearm death rates per 100,000 from 2000 to 2010 and positive value indicates increase in firearm death rate per 100,000 from 2000 to 2010. CI denotes confidence intervals of the annual change in firearm death rate per 100,000. SMD indicates standardized mean difference; is equal to annual change/standard deviation. P-trend calculated using meta-regression indicates the significance of the decline or the increase in firearm related death rates from 2000 to 2010. Data are from Center for Disease Control and Prevention (CDC)'s National center for Injury Prevention and Control Web-based Injury Statistics Query and Reporting System (WISQARS)



Supplementary Figure 1A:

Firearm deaths from 2000 to 2010 by U.S census regions among whites

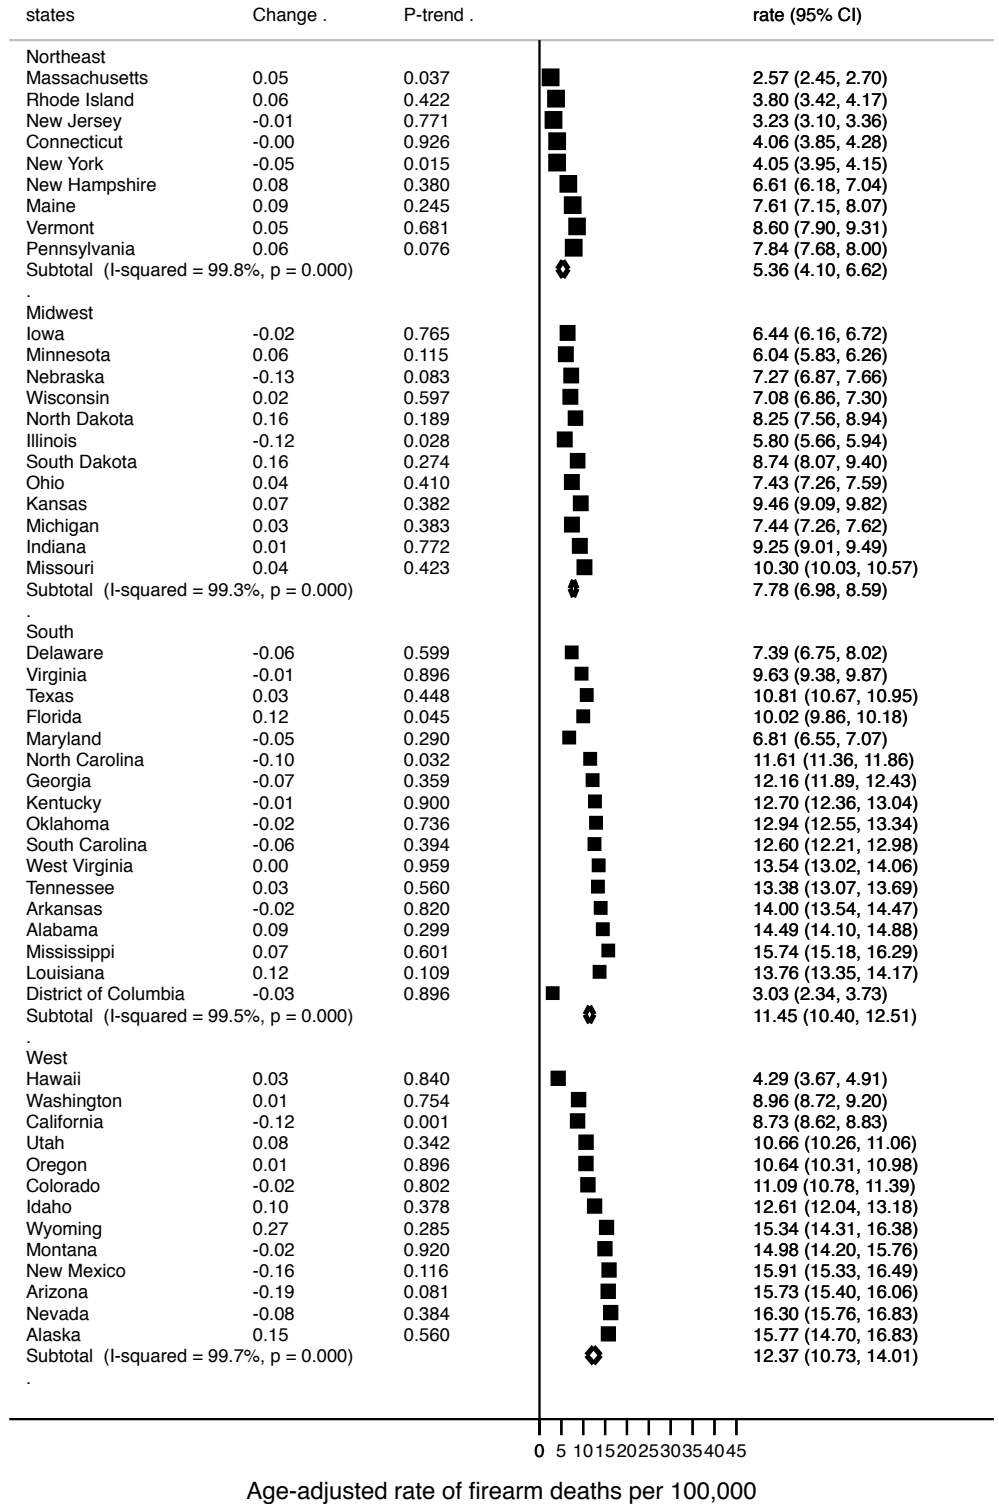

## Supplementary Figure 1B:

## Firearm deaths from 2000 to 2010 by U.S census regions among blacks

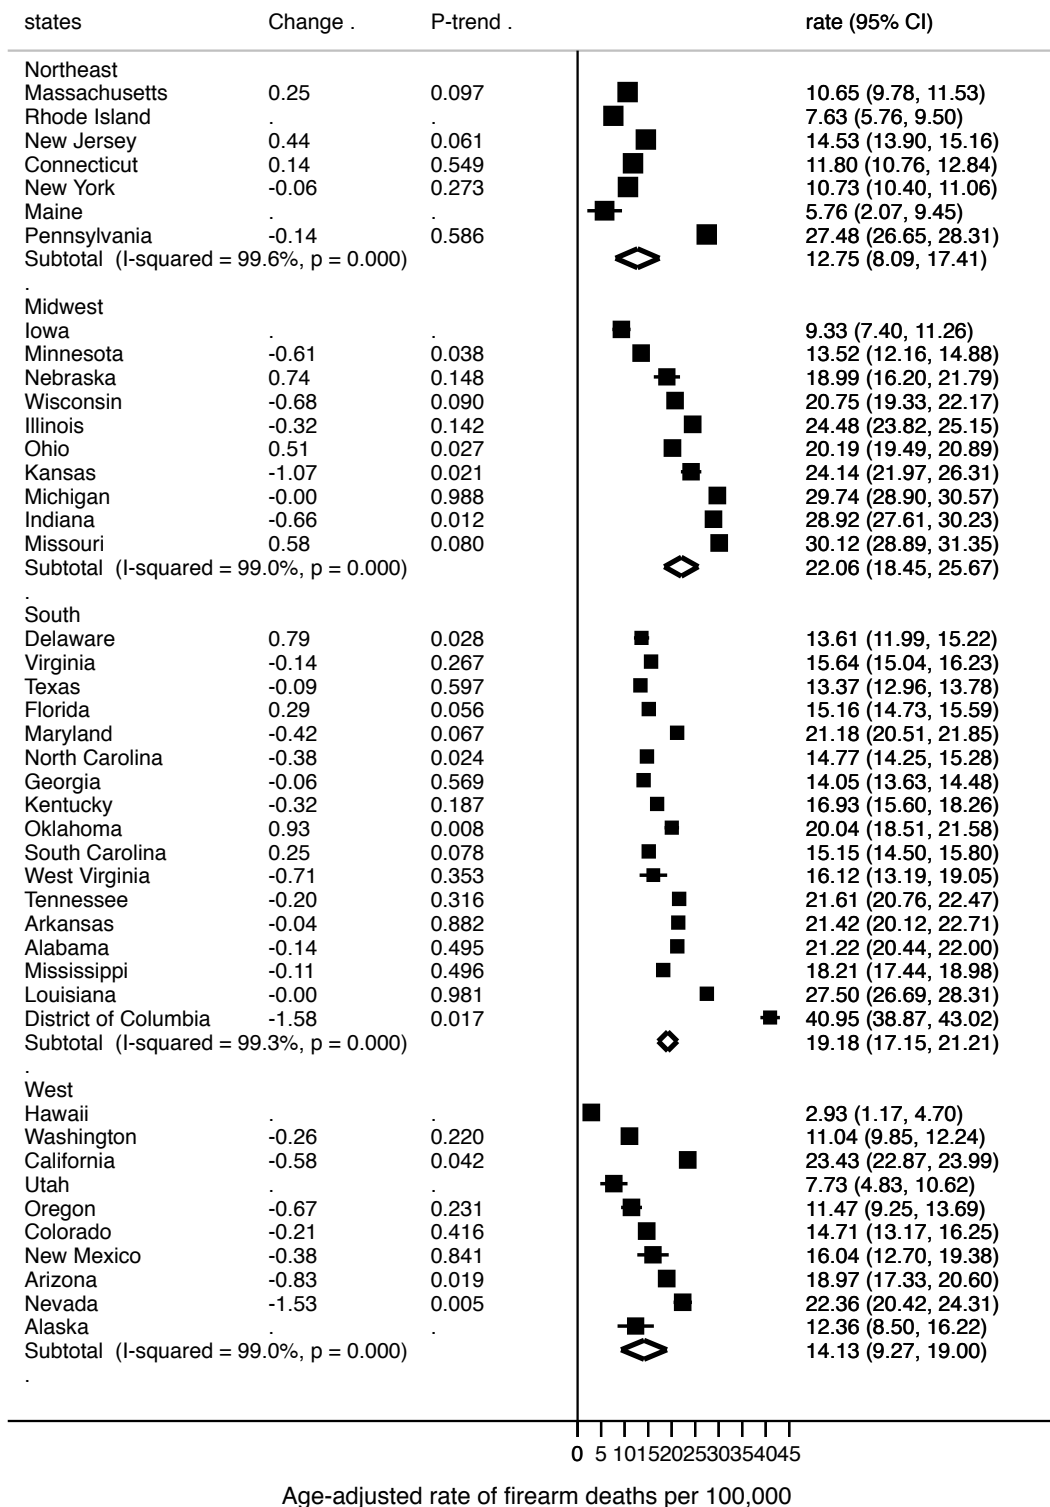

Supplementary Figure 1C

Firearm deaths from 2000 to 2010 by U.S census regions among other race

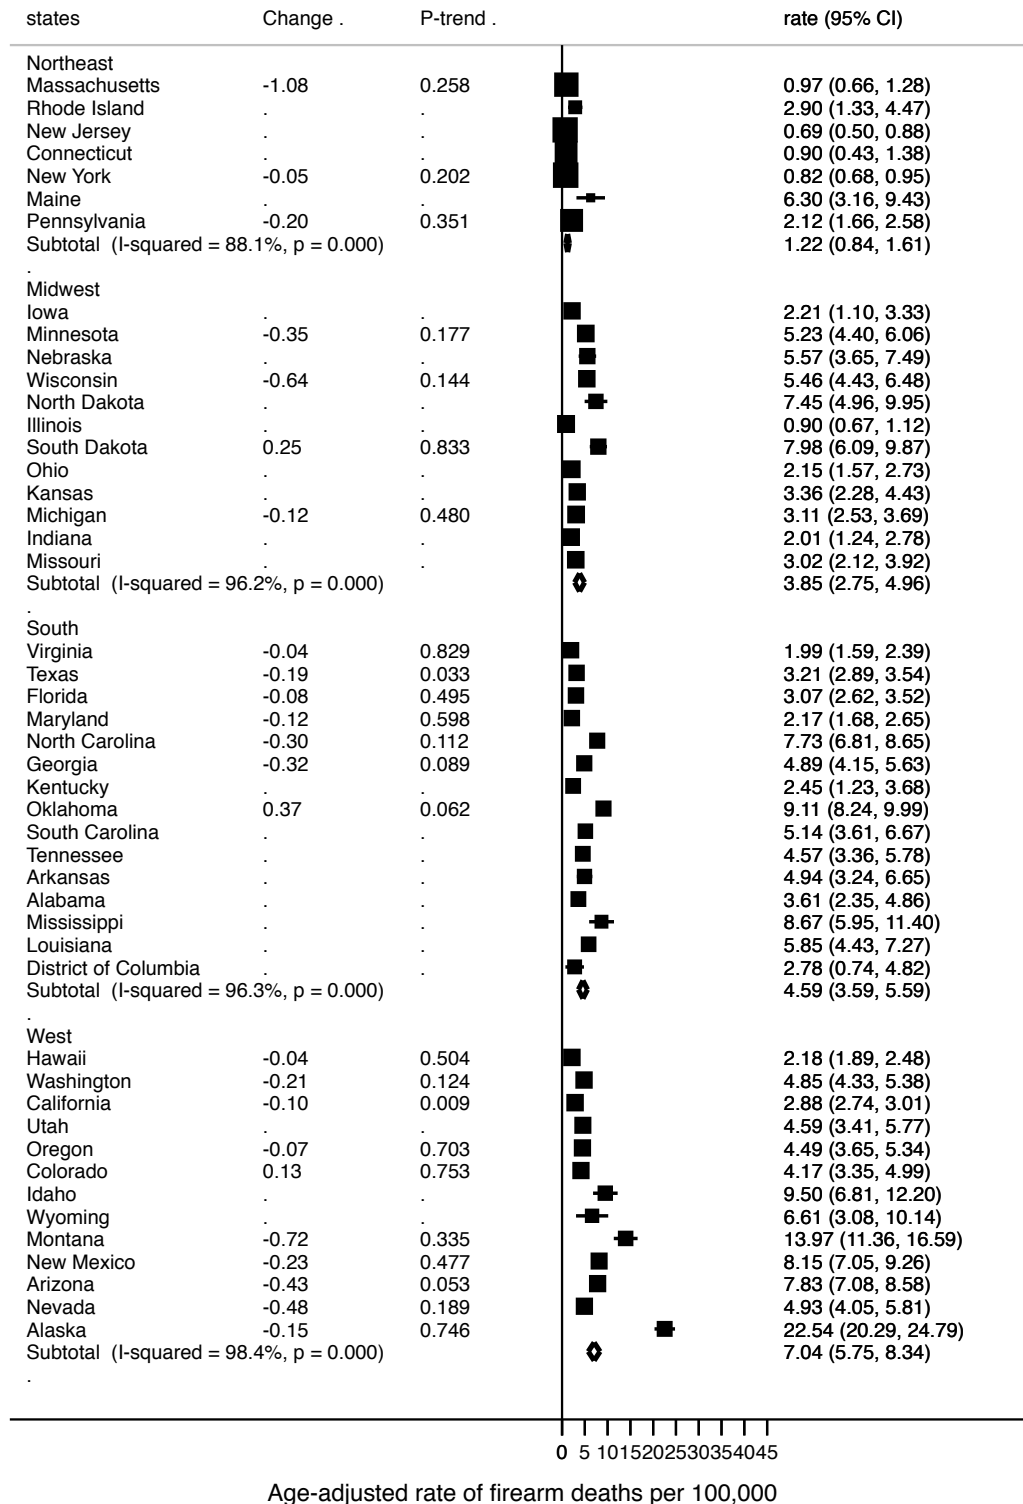

## Supplementary Figure 2A:

## Firearm deaths from 2000 to 2010 by U.S census regions among hispanics

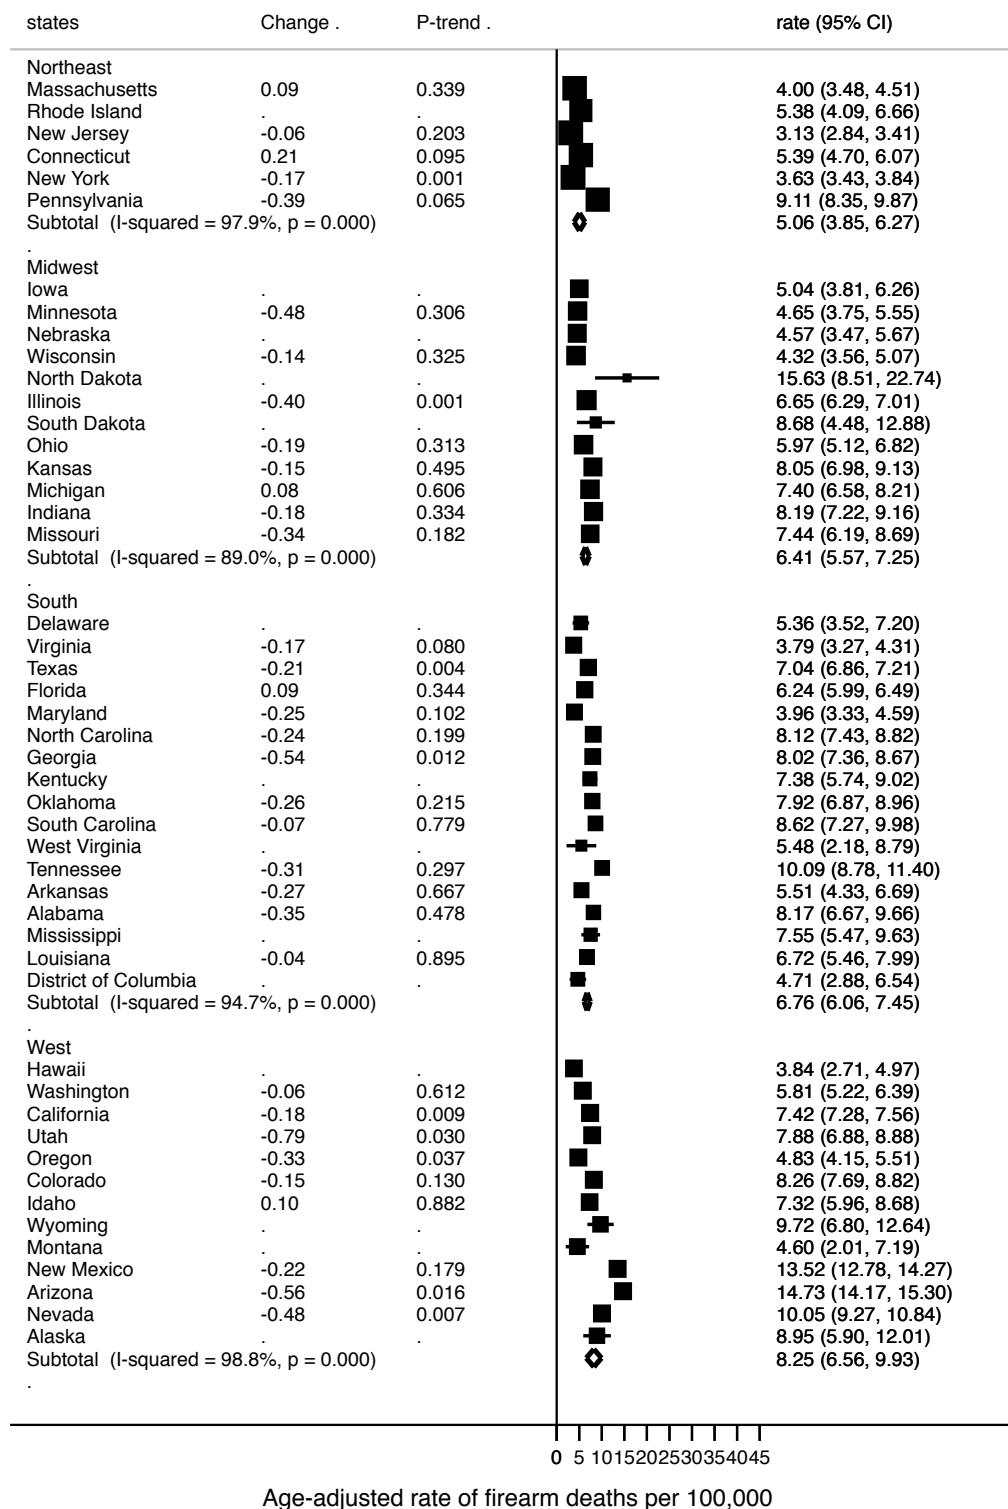

Supplementary Figure 2B:

Firearm deaths from 2000 to 2010 by U.S census regions among non-hispani

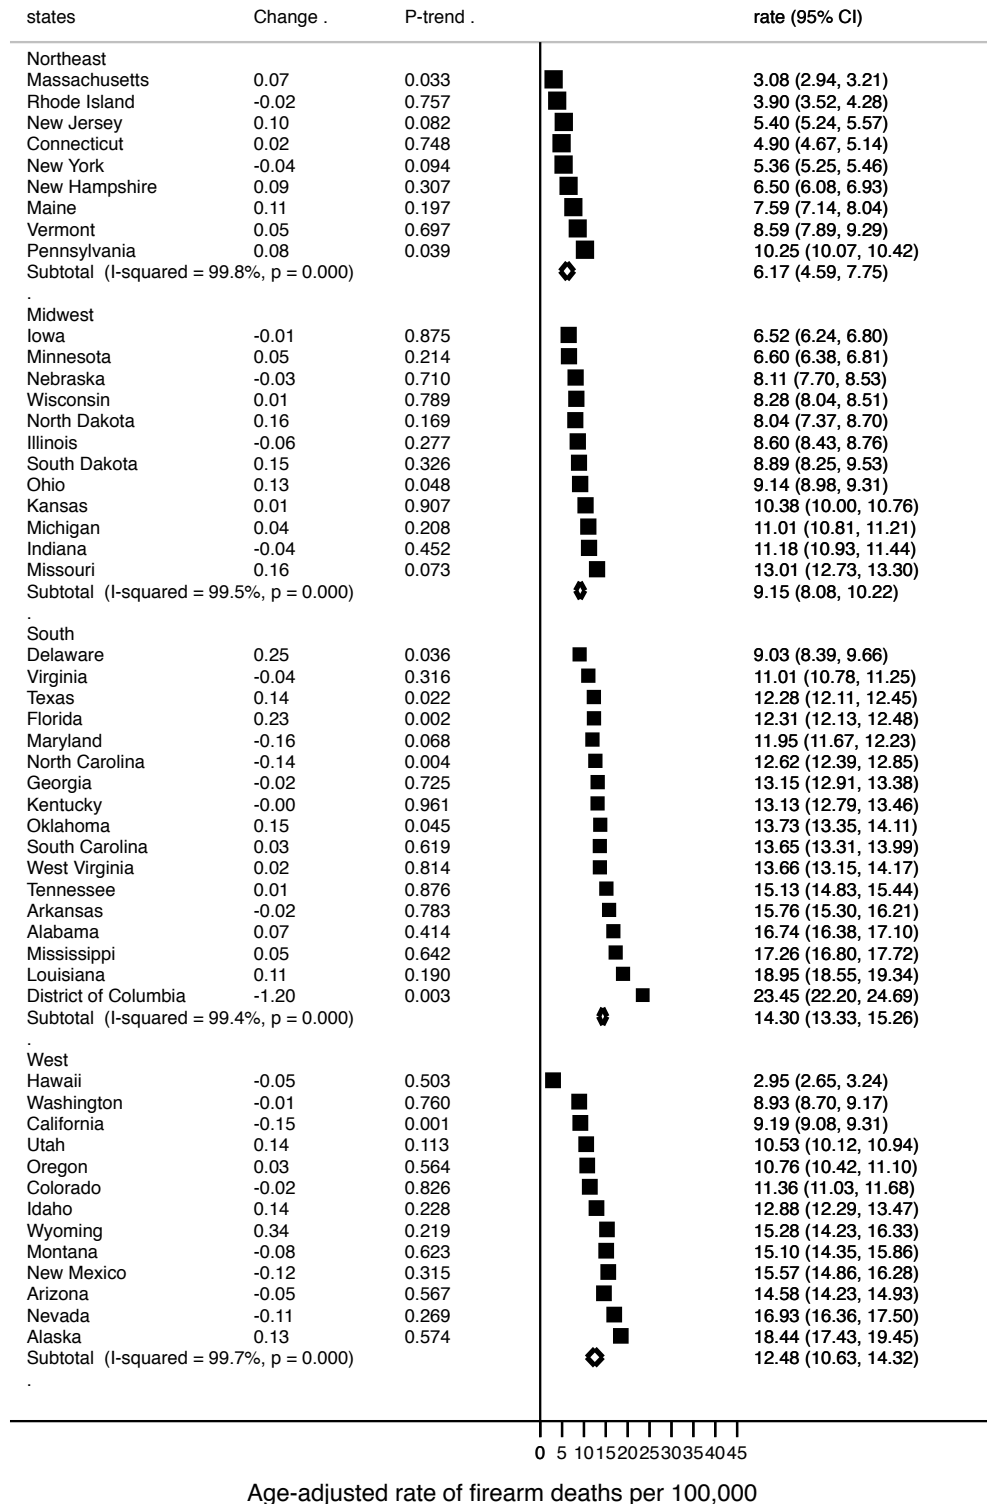

## Supplementary Figure 3A:

## Firearm deaths due to homicide from 2000 to 2010 by U.S census regions

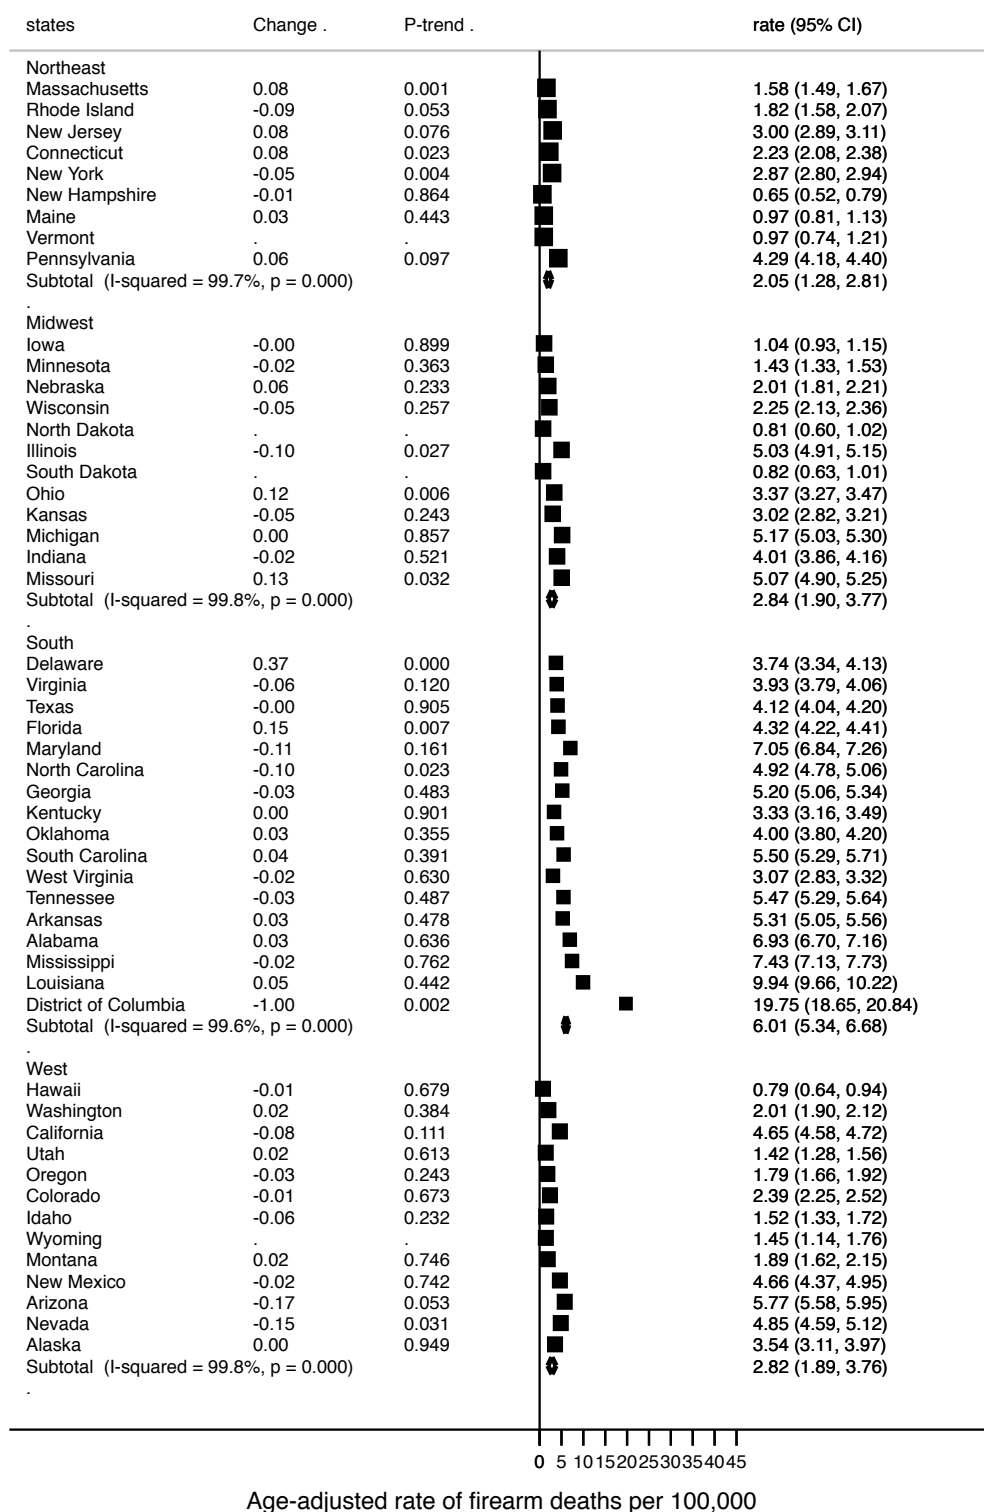

Supplementary Figure 3B:

Firearm deaths due to suicides from 2000 to 2010 by U.S census regions

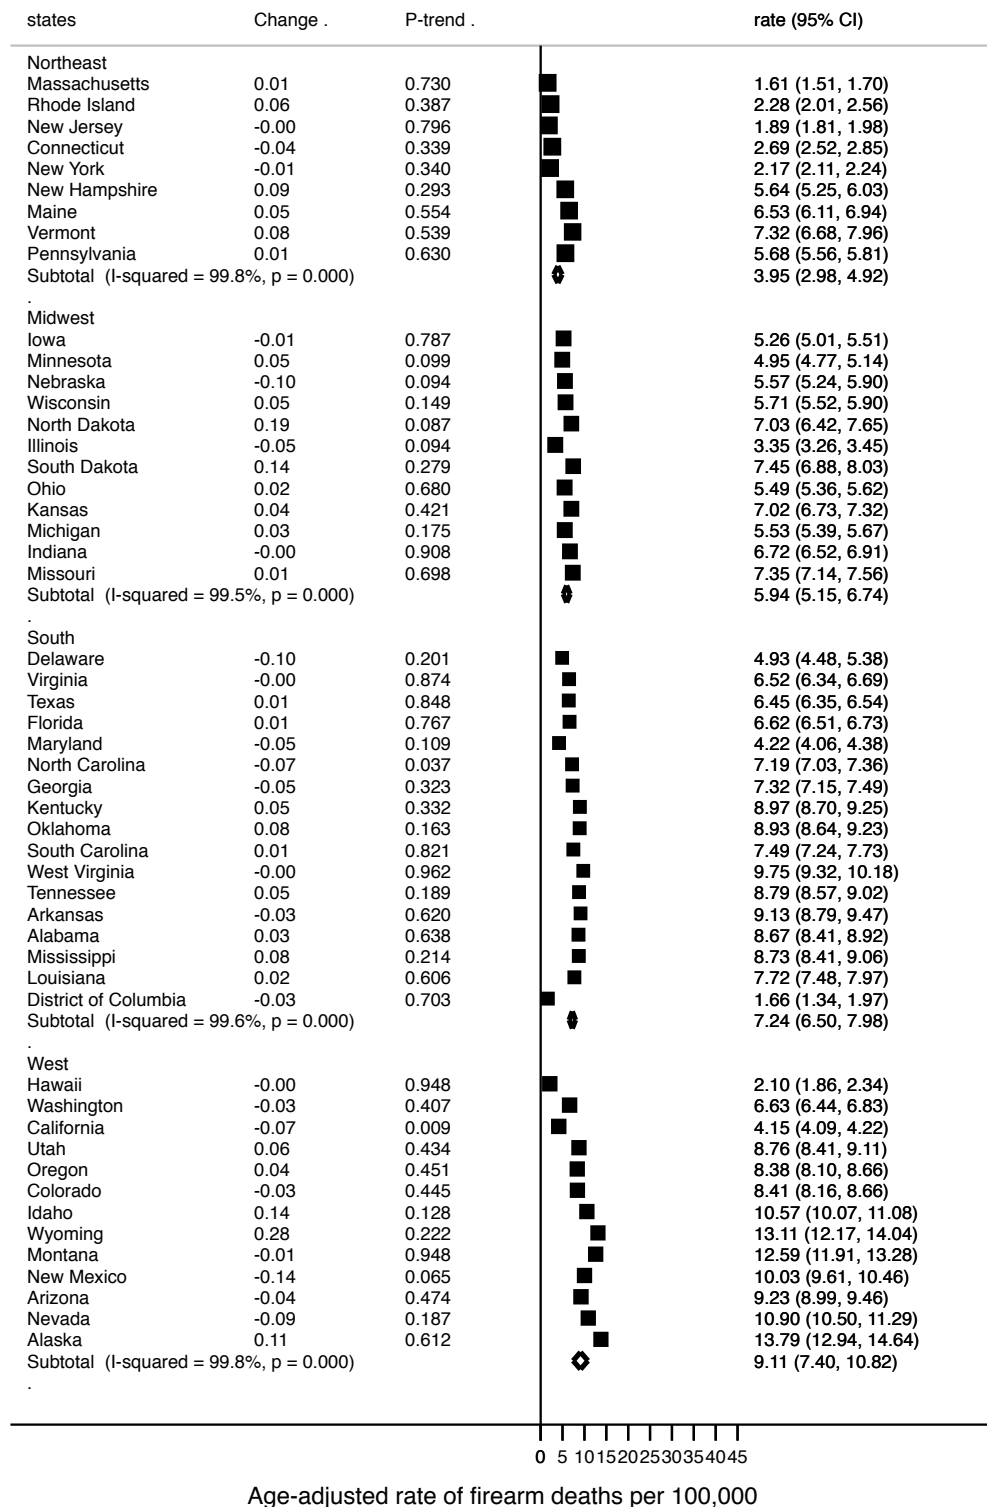

## Supplementary Figure 3C:

## Undetermined firearm deaths from 2000 to 2010 by U.S census regions

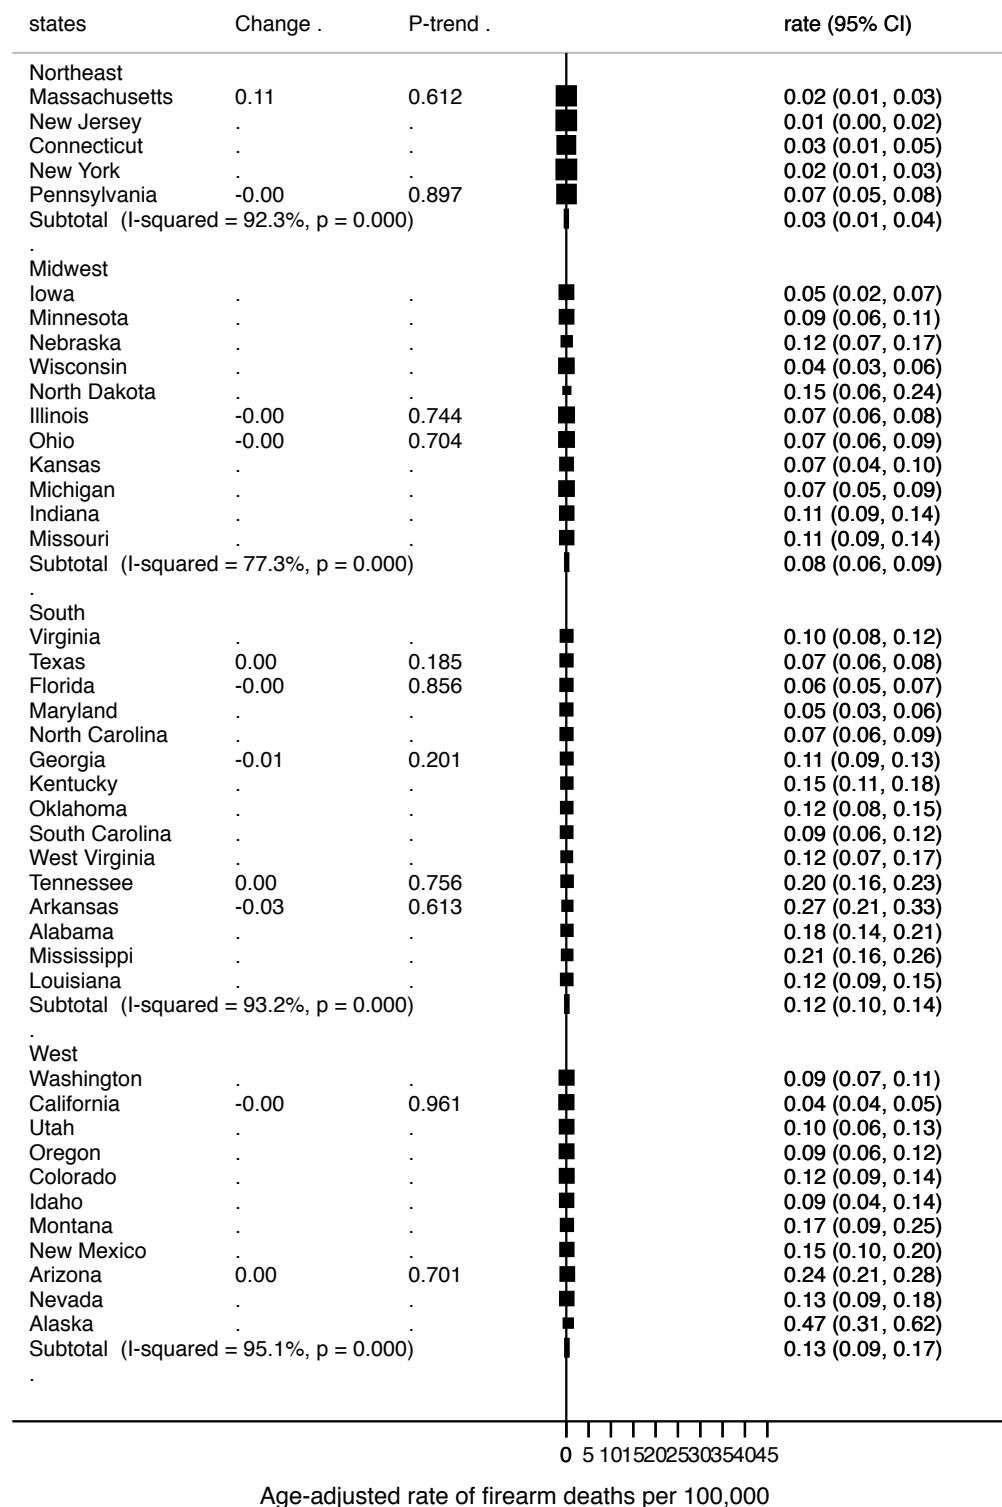



Supplementary Figure 3D:

Unintentional firearm deaths from 2000 to 2010 by U.S census regions

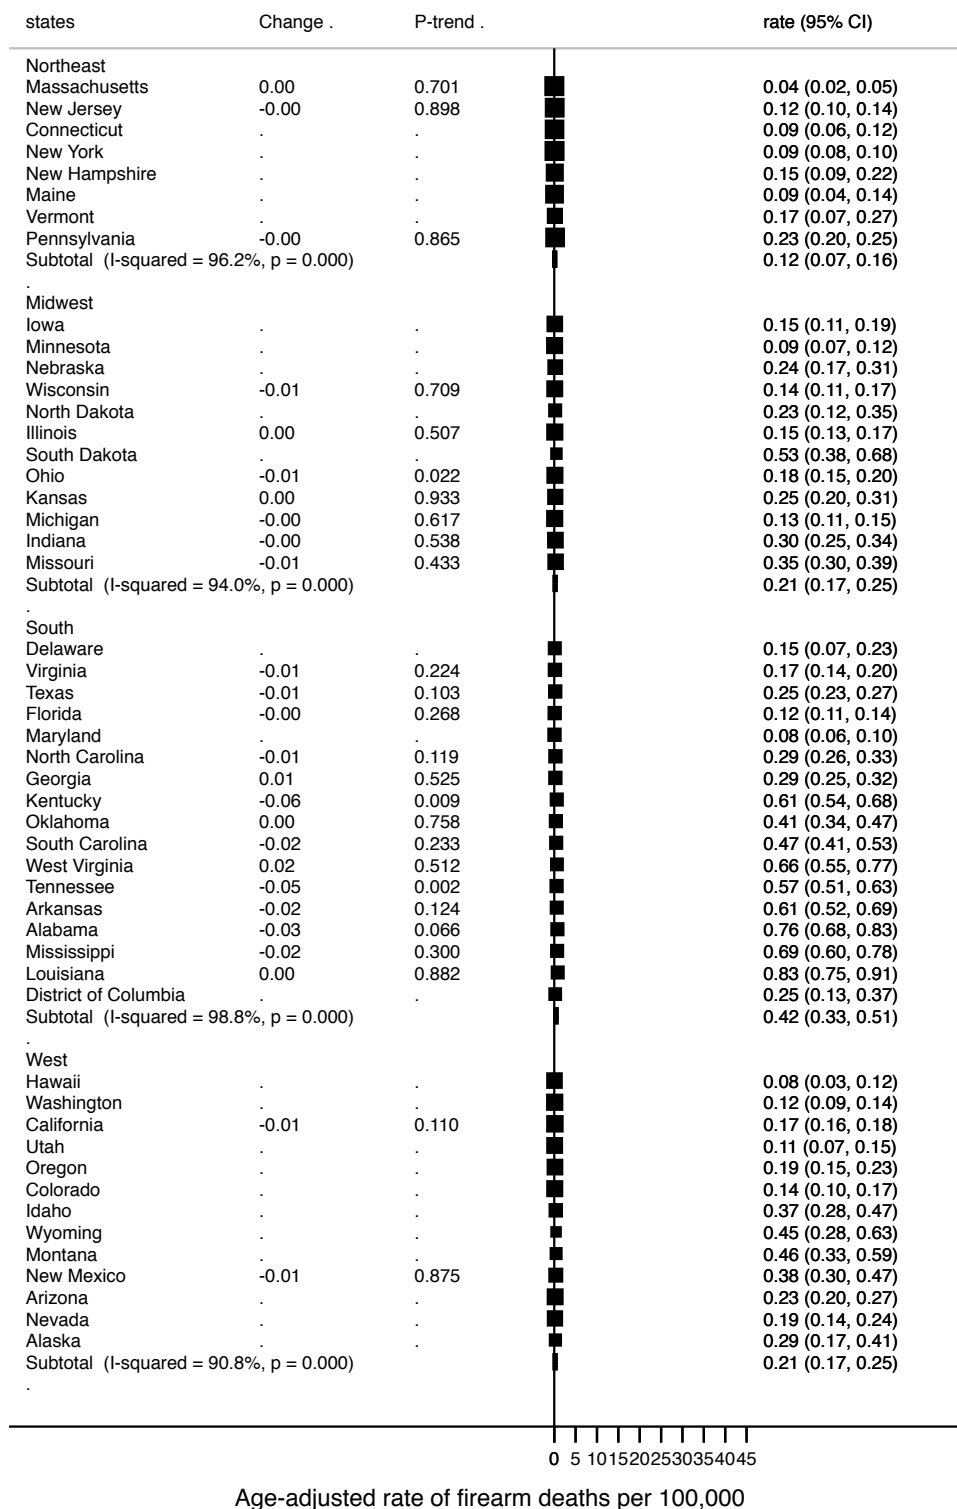

**STROBE 2007 (v4) checklist of items to be included in reports of observational studies in epidemiology\***  
**Checklist for cohort, case-control, and cross-sectional studies (combined)**

| Section/Topic             | Item # | Recommendation                                                                                                                                                                                                                                                                                                                                                                                                                                                         | Reported on page # |
|---------------------------|--------|------------------------------------------------------------------------------------------------------------------------------------------------------------------------------------------------------------------------------------------------------------------------------------------------------------------------------------------------------------------------------------------------------------------------------------------------------------------------|--------------------|
| Title and abstract        | 1      | (a) Indicate the study’s design with a commonly used term in the title or the abstract                                                                                                                                                                                                                                                                                                                                                                                 | 3                  |
|                           |        | (b) Provide in the abstract an informative and balanced summary of what was done and what was found                                                                                                                                                                                                                                                                                                                                                                    | 3                  |
| <b>Introduction</b>       |        |                                                                                                                                                                                                                                                                                                                                                                                                                                                                        |                    |
| Background/rationale      | 2      | Explain the scientific background and rationale for the investigation being reported                                                                                                                                                                                                                                                                                                                                                                                   | 5                  |
| Objectives                | 3      | State specific objectives, including any pre-specified hypotheses                                                                                                                                                                                                                                                                                                                                                                                                      | 5                  |
| <b>Methods</b>            |        |                                                                                                                                                                                                                                                                                                                                                                                                                                                                        |                    |
| Study design              | 4      | Present key elements of study design early in the paper                                                                                                                                                                                                                                                                                                                                                                                                                | 6                  |
| Setting                   | 5      | Describe the setting, locations, and relevant dates, including periods of recruitment, exposure, follow-up, and data collection                                                                                                                                                                                                                                                                                                                                        | 6                  |
| Participants              | 6      | (a) <i>Cohort study</i> —Give the eligibility criteria, and the sources and methods of selection of participants. Describe methods of follow-up<br><i>Case-control study</i> —Give the eligibility criteria, and the sources and methods of case ascertainment and control selection. Give the rationale for the choice of cases and controls<br><i>Cross-sectional study</i> —Give the eligibility criteria, and the sources and methods of selection of participants | 6                  |
|                           |        | (b) <i>Cohort study</i> —For matched studies, give matching criteria and number of exposed and unexposed<br><i>Case-control study</i> —For matched studies, give matching criteria and the number of controls per case                                                                                                                                                                                                                                                 |                    |
| Variables                 | 7      | Clearly define all outcomes, exposures, predictors, potential confounders, and effect modifiers. Give diagnostic criteria, if applicable                                                                                                                                                                                                                                                                                                                               | 6                  |
| Data sources/ measurement | 8*     | For each variable of interest, give sources of data and details of methods of assessment (measurement). Describe comparability of assessment methods if there is more than one group                                                                                                                                                                                                                                                                                   | 6                  |
| Bias                      | 9      | Describe any efforts to address potential sources of bias                                                                                                                                                                                                                                                                                                                                                                                                              | 16-17              |
| Study size                | 10     | Explain how the study size was arrived at                                                                                                                                                                                                                                                                                                                                                                                                                              | 6                  |
| Quantitative variables    | 11     | Explain how quantitative variables were handled in the analyses. If applicable, describe which groupings were chosen and why                                                                                                                                                                                                                                                                                                                                           | 6                  |
| Statistical methods       | 12     | (a) Describe all statistical methods, including those used to control for confounding                                                                                                                                                                                                                                                                                                                                                                                  | 7                  |
|                           |        | (b) Describe any methods used to examine subgroups and interactions                                                                                                                                                                                                                                                                                                                                                                                                    | 7                  |
|                           |        | (c) Explain how missing data were addressed                                                                                                                                                                                                                                                                                                                                                                                                                            | na                 |
|                           |        | (d) <i>Cohort study</i> —If applicable, explain how loss to follow-up was addressed<br><i>Case-control study</i> —If applicable, explain how matching of cases and controls was addressed                                                                                                                                                                                                                                                                              | 7                  |

|                          |     |                                                                                                                                                                                                              |       |
|--------------------------|-----|--------------------------------------------------------------------------------------------------------------------------------------------------------------------------------------------------------------|-------|
|                          |     | <i>Cross-sectional study</i> —If applicable, describe analytical methods taking account of sampling strategy                                                                                                 |       |
|                          |     | (e) Describe any sensitivity analyses                                                                                                                                                                        | na    |
| <b>Results</b>           |     |                                                                                                                                                                                                              |       |
| Participants             | 13* | (a) Report numbers of individuals at each stage of study—eg numbers potentially eligible, examined for eligibility, confirmed eligible, included in the study, completing follow-up, and analysed            | 8     |
|                          |     | (b) Give reasons for non-participation at each stage                                                                                                                                                         | na    |
|                          |     | (c) Consider use of a flow diagram                                                                                                                                                                           | na    |
| Descriptive data         | 14* | (a) Give characteristics of study participants (eg demographic, clinical, social) and information on exposures and potential confounders                                                                     | na    |
|                          |     | (b) Indicate number of participants with missing data for each variable of interest                                                                                                                          | na    |
|                          |     | (c) <i>Cohort study</i> —Summarise follow-up time (eg, average and total amount)                                                                                                                             | na    |
| Outcome data             | 15* | <i>Cohort study</i> —Report numbers of outcome events or summary measures over time                                                                                                                          | na    |
|                          |     | <i>Case-control study</i> —Report numbers in each exposure category, or summary measures of exposure                                                                                                         | na    |
|                          |     | <i>Cross-sectional study</i> —Report numbers of outcome events or summary measures                                                                                                                           | 8-11  |
| Main results             | 16  | (a) Give unadjusted estimates and, if applicable, confounder-adjusted estimates and their precision (eg, 95% confidence interval). Make clear which confounders were adjusted for and why they were included | 8-11  |
|                          |     | (b) Report category boundaries when continuous variables were categorized                                                                                                                                    | na    |
|                          |     | (c) If relevant, consider translating estimates of relative risk into absolute risk for a meaningful time period                                                                                             | na    |
| Other analyses           | 17  | Report other analyses done—eg analyses of subgroups and interactions, and sensitivity analyses                                                                                                               | 8-11  |
| <b>Discussion</b>        |     |                                                                                                                                                                                                              |       |
| Key results              | 18  | Summarise key results with reference to study objectives                                                                                                                                                     | 12    |
| Limitations              | 19  | Discuss limitations of the study, taking into account sources of potential bias or imprecision. Discuss both direction and magnitude of any potential bias                                                   | 16-17 |
| Interpretation           | 20  | Give a cautious overall interpretation of results considering objectives, limitations, multiplicity of analyses, results from similar studies, and other relevant evidence                                   | 12-16 |
| Generalisability         | 21  | Discuss the generalisability (external validity) of the study results                                                                                                                                        | na    |
| <b>Other information</b> |     |                                                                                                                                                                                                              |       |
| Funding                  | 22  | Give the source of funding and the role of the funders for the present study and, if applicable, for the original study on which the present article is based                                                | na    |

\*Give information separately for cases and controls in case-control studies and, if applicable, for exposed and unexposed groups in cohort and cross-sectional studies.

**Note:** An Explanation and Elaboration article discusses each checklist item and gives methodological background and published examples of transparent reporting. The STROBE checklist is best used in conjunction with this article (freely available on the Web sites of PLoS Medicine at <http://www.plosmedicine.org/>, Annals of Internal Medicine at <http://www.annals.org/>, and Epidemiology at <http://www.epidem.com/>). Information on the STROBE Initiative is available at [www.strobe-statement.org](http://www.strobe-statement.org).

# BMJ Open

## State-specific, racial and ethnic heterogeneity in trends of firearm-related fatality rates in the United States from 2000-2010

|                                 |                                                                                                                                                                                                                                                                                                                                                                                                                                                                                   |
|---------------------------------|-----------------------------------------------------------------------------------------------------------------------------------------------------------------------------------------------------------------------------------------------------------------------------------------------------------------------------------------------------------------------------------------------------------------------------------------------------------------------------------|
| Journal:                        | <i>BMJ Open</i>                                                                                                                                                                                                                                                                                                                                                                                                                                                                   |
| Manuscript ID:                  | bmjopen-2014-005628.R1                                                                                                                                                                                                                                                                                                                                                                                                                                                            |
| Article Type:                   | Research                                                                                                                                                                                                                                                                                                                                                                                                                                                                          |
| Date Submitted by the Author:   | 02-Jul-2014                                                                                                                                                                                                                                                                                                                                                                                                                                                                       |
| Complete List of Authors:       | Kalesan, Bindu; Columbia University, Surgery and Epidemiology<br>Vasan, Sowmya; Columbia University, Surgery<br>Mobily, Matthew; Columbia University, Epidemiology<br>Villarreal, Marcos; Columbia University, Epidemiology<br>Hlavacek, Patrick; Columbia University, Epidemiology<br>Teperman, Sheldon; Jacobi Medical Center, Trauma and Critical Care Services<br>Fagan, Jeffrey; Columbia University, Law & Epidemiology<br>Galea, Sandro; Columbia University, Epidemiology |
| <b>Primary Subject Heading</b>: | Public health                                                                                                                                                                                                                                                                                                                                                                                                                                                                     |
| Secondary Subject Heading:      | Public health, Epidemiology                                                                                                                                                                                                                                                                                                                                                                                                                                                       |
| Keywords:                       | EPIDEMIOLOGY, PREVENTIVE MEDICINE, PUBLIC HEALTH, STATISTICS & RESEARCH METHODS                                                                                                                                                                                                                                                                                                                                                                                                   |
|                                 |                                                                                                                                                                                                                                                                                                                                                                                                                                                                                   |

SCHOLARONE™  
Manuscripts

only

1  
2  
3 July 02, 2014  
4  
5  
6

7 **Title: State-specific, racial and ethnic heterogeneity in trends of firearm-**  
8 **related fatality rates in the United States from 2000-2010**  
9

10 Corresponding author:

11 Bindu Kalesan  
12 Department of Surgery & Epidemiology,  
13 Columbia University,  
14 650 W 168<sup>th</sup> Street Room 210  
15 New York, NY, USA  
16 Email: [kb2693@cumc.columbia.edu](mailto:kb2693@cumc.columbia.edu)  
17 Tel: 212-305-8880  
18  
19

20  
21 Co-authors:

22 Sowmya Vasam  
23 Department of Surgery,  
24 Columbia University,  
25 New York, NY, USA  
26 Email: [sv2436@cumc.columbia.edu](mailto:sv2436@cumc.columbia.edu)  
27  
28

29  
30 Matthew E Mobily  
31 Department of Epidemiology,  
32 Columbia University,  
33 New York, NY, USA  
34 Email: [mem2292@columbia.edu](mailto:mem2292@columbia.edu)  
35  
36

37 Marcos D Villarreal  
38 Department of Epidemiology,  
39 Columbia University,  
40 New York, NY, USA  
41 Email: [mdv2119@columbia.edu](mailto:mdv2119@columbia.edu)  
42  
43

44 Patrick Hlavacek  
45 Department of Epidemiology,  
46 Columbia University,  
47 New York, NY, USA  
48 Email: [ph2394@columbia.edu](mailto:ph2394@columbia.edu)  
49  
50

51 Sheldon Teperman  
52 Trauma and Critical Care Services,  
53 Jacobi Medical Center  
54 Bronx, NY, USA  
55 Email: [Sheldon.Teperman@nbhn.net](mailto:Sheldon.Teperman@nbhn.net)  
56  
57  
58  
59  
60

1  
2  
3 Jeffrey A Fagan  
4 Department of Law & Epidemiology,  
5 Columbia University,  
6 New York, NY, USA  
7 Email: [jfagan@law.columbia.edu](mailto:jfagan@law.columbia.edu)  
8  
9

10 Sandro Galea  
11 Department of Epidemiology,  
12 Columbia University,  
13 New York, NY, USA  
14 Email: [sgalea@cumc.columbia.edu](mailto:sgalea@cumc.columbia.edu)  
15  
16

17  
18  
19  
20  
21  
22  
23 Keywords: firearms, temporal trends, mortality  
24

25 Word count: 2964  
26  
27  
28  
29  
30  
31  
32  
33  
34  
35  
36  
37  
38  
39  
40  
41  
42  
43  
44  
45  
46  
47  
48  
49  
50  
51  
52  
53  
54  
55  
56  
57  
58  
59  
60

**Abstract:**

**Objectives:** To document overall, racial, ethnic and intent-specific spatio-temporal trends of firearm related fatality rates (FRF-rate) in the United States.

**Design:** Cross-sectional study per year from 2000 to 2010.

**Setting:** United States.

**Participants:** Aggregate count of all people in the US from 2000 to 2010.

**Outcome measures:** Data from the Web-based Injury Statistics Query and Reporting System from 2000-2010 was used to determine annual FRF-rates per 100,000 and by states, race, ethnicity and intent.

**Results:** The average national 11-year FRF-rate was 10.21 per 100,000, from 3.02 to 18.62 in Louisiana: 60% of states had higher than national rates and 41 states showed no temporal change. The average national FRF-rates among blacks and whites were 18.51 and 9.05 per 100,000 and among Hispanics and non-Hispanics were 7.13 and 10.13 per 100,000; Hispanics had a decreasing change of -0.18,  $p$ -trend<0.0001. In states with increasing trends (Florida and Massachusetts), whites and non-Hispanics drove the rise; while in states with decreasing trends (California, North Carolina, Arizona, Nevada, New York, Illinois, Maryland), Hispanics and blacks drove the fall. The average national FRF-rates due to homicides (4.1 per 100,000) and suicides (5.8 per 100,000) remained constant, but varied between states.

**Conclusion:** Endemic national FRF-rates mask a wide variation in time trends between states. FRF-rates were twice as high in blacks than whites but decreased

1  
2  
3 among Hispanics. Efforts to identify state-specific best practices can contribute to  
4  
5  
6 changes in national FRF-rates that remain high.  
7  
8  
9

### 10 11 12 13 14 15 16 17 18 19 **Strengths of this study**

- 20  
21 • This study uses the best available data reporting system for surveillance of  
22 firearm mortality in US.
- 23 • Brings into light the overall state-specific variability of temporal trends of  
24 firearm mortality, which was obscured by the endemic national firearm  
25 fatality rates during 2000-2010 and according to race, ethnicity and intent  
26 from a seemingly stable national burden of firearm deaths.
- 27 • This is the first report that documents firearm fatality trends by ethnicity
- 28 • Our results call for identification of drivers of state-specific temporal  
29 trends to introduce tailored programs targeted to reduce deaths and  
30 injury due to firearms.  
31  
32  
33  
34

### 35 36 **Limitations of this study**

- 37 • Possible under reporting of firearm fatal events, which cannot be verified.
- 38 • Despite the considerable state-specific heterogeneity, the actual variation  
39 in firearm mortality may be a feature of cities and counties with varying  
40 crime rates, and we do not address the variation existing at such level.
- 41 • Finally, comparisons made between other races may not be usefully  
42 interpreted due to the heterogeneity and the small frequency of events in  
43 this sub-population.  
44  
45  
46  
47  
48  
49  
50  
51  
52  
53  
54  
55  
56  
57  
58  
59  
60



1  
2  
3  
4  
5  
6  
7  
8  
9  
10  
11  
12  
13  
14  
15  
16  
17  
18  
19  
20  
21  
22  
23  
24  
25  
26  
27  
28  
29  
30  
31  
32  
33  
34  
35  
36  
37  
38  
39  
40  
41  
42  
43  
44  
45  
46  
47  
48  
49  
50  
51  
52  
53  
54  
55  
56  
57  
58  
59  
60

Firearm violence increased during the 1980s and peaked in 1993, with 39,595 firearm deaths in the US and a firearm-related fatality rate (FRF-rate) of 15.0 per 100,000.<sup>1</sup> Since the turn of the 21<sup>st</sup> century, FRF-rates in the US have become endemic around 10.3 per 100,000 accounting for 17.5% of all injury deaths,<sup>2</sup> while the intent of firearm deaths was mainly suicide and homicide.<sup>3</sup>

The FRF-rate in 1993 among blacks was three-times greater than whites, but similar among Hispanics and non-Hispanics.<sup>1 4</sup> The overall fall in FRF after 2000 corresponded to a related narrowing of the racial gap between blacks and whites, where, by 2010, the FRF-rates among blacks was twice greater than whites.<sup>1</sup> Several factors have been posited that might explain these persistent racial differences, including socioeconomic determinants and increased firearm availability.<sup>5 6</sup>

Although the national temporal trends in FRF have been previously well documented,<sup>3 7 8</sup> there is ample reason to suspect substantial heterogeneity in FRF across states, such as dramatic differences in gun laws controlling access to firearms, variability in enforcement of national standards across states,<sup>8 9</sup> changing demographics and violence.<sup>10</sup> It is likely that some of the state-to-state heterogeneity in the potential determinants of FRF may also contribute to variability in racial and ethnic differences in FRF within states.

With this in mind, this study had two distinct aims. First, we aimed to document national and state-specific trends in FRF-rates along with the annual change in FRF-rates from 2000-2010 and second, to determine the racial, ethnic and

1  
2  
3 intent-specific differences in FRF-rates within each state during the same time  
4  
5 period.  
6  
7  
8  
9  
10  
11  
12  
13  
14  
15  
16  
17  
18  
19  
20  
21  
22  
23  
24  
25  
26  
27  
28  
29  
30  
31  
32  
33  
34  
35  
36  
37  
38  
39  
40  
41  
42  
43  
44  
45  
46  
47  
48  
49  
50  
51  
52  
53  
54  
55  
56  
57  
58  
59  
60

For peer review only

## METHODS

### Data source

We accessed the restricted fatal injury data reports from the Web-based Injury Statistics Query and Reporting System (WISQARS™), an interactive database system provided by Centers for Disease Control and Prevention's (CDC) Injury Prevention and Control Unit (<http://www.cdc.gov/injury/wisqars/>).<sup>1</sup> The data in the WISQARS system is derived from CDC annual mortality data from National Vital Statistics System (NVSS), National Center for Health Statistics (NCHS) (<http://www.cdc.gov/nchs/>) and CDC. The NCHS and the National Association of Public Health Statistics and Information Systems restricts reporting NVSS data for cumulative frequencies <10 for sub-national geographic areas to prevent unintentional disclosure of cases. International Classification of Disease-10th Revision (ICD-10) was used for coding mortality data including intent of injury.<sup>11</sup>

### Study population and variables

Our study population consisted of national and state-specific fatal firearm injuries from 2000-2010 obtained from querying the WISQARS data system. Aggregate information such as number of firearm deaths, total population and age-adjusted rates according to race (black, white, other), ethnicity (Hispanic and non-Hispanic) and intent (homicide/legal intervention, suicide, undetermined and unintentional) was obtained.

### Statistical analysis

1  
2  
3 The standard errors (SE) for national and state-specific age-adjusted FRF-  
4 rates per 100,000 persons were derived for the overall 11-year period and annually  
5 and by race, ethnicity and intent. Age-adjusted rates are obtained by direct  
6 standardization using the 2000 population. The overall 11-year rates were assessed  
7 as total firearm deaths over the total population during the 11-years. Since only  
8 aggregate data could be obtained from WISQARS without individual patient data, we  
9 used random effects meta-analysis and meta-regression.<sup>12</sup> The rates in each  
10 category and the SEs were meta-analyzed using random-effects meta-analysis.  
11 Heterogeneity between states was assessed using  $I^2$  statistic; which ranges from 0 to  
12 100% and denotes the proportion of variation across states other than by chance.<sup>13</sup>  
13  
14 <sup>14</sup> In order to assess the temporal trends from 2000-2010, we assumed linear trends  
15 across 11 years and used meta-regression to calculate the change in rates (slope)  
16 and the standard deviation (SD). The p-value from meta-regression was used to  
17 assess evidence for trend. Standardized mean difference (SMD) was calculated by  
18 dividing the annual change in age-adjusted rate by SD.<sup>15 16</sup> We do not present  
19 estimates for those states with number of deaths below 10. Lives-lost or saved are  
20 estimated by applying annual change to the total 11-year population (2000-2010).  
21 The difference between 11-year national and state-specific FRF-rates (overall and  
22 category-specific) were used to spatially represent the variation between states.  
23 STATA 13.1 (StataCorp LP, College Station, Texas; 2009) was used to analyze the  
24 data.  
25  
26  
27  
28  
29  
30  
31  
32  
33  
34  
35  
36  
37  
38  
39  
40  
41  
42  
43  
44  
45  
46  
47  
48  
49  
50  
51  
52  
53  
54  
55  
56  
57  
58  
59  
60

## RESULTS

Between 2000 and 2010, a total of 335,609 firearm-related deaths were recorded and the overall mortality rate was 10.21 per 100,000. The annual change in FRF-rate across 11-years was -0.017 with a 95% confidence interval (95% CI) of -0.044-0.010, p-trend=0.18, indicating no significant change in national FRF-rates.

**Table 1** presents national FRF-rates, for 11-years and annually according to race, ethnicity and intent. Cumulative 11-year FRF-rates were disproportionately high among blacks (18.51) as compared to whites and other race groups, and lowest among other races (3.38). Among whites the FRF-rates were lower than the overall national 11-year rate while increasing from 8.97 to 9.20 from 2000-2010. This annual increase was small (0.006, SMD=0.11) but not significant, p-trend=0.71. Even though the FRF-rates among blacks were consistently higher than national FRF-rates, the annual rates reduced from 18.30 to 16.90; and this decline, -0.114 was not significant, SMD=-0.40, p-trend=0.22. The decline in FRF-rates from 4.76 to 3.25 among other races was significant (change=-0.12, SMD=-1.83, p-trend<0.0001). Annual reduction observed among Hispanics showed a significant reduction, -0.179, p-trend<0.0001 alongside an already low 11-year FRF-rate of 7.13. FRF-rates among non-Hispanics remained slightly above the national rates without increase. FRF-rate by intent was highest for suicides (5.80) while the annual change was minimal in all four categories with a small significant reduction for unintentional deaths (change=-0.010, SMD=-1.70, p-trend<0.0001).

1  
2  
3  
4  
5  
6  
7  
8  
9  
10  
11  
12  
13  
14  
15  
16  
17  
18  
19  
20  
21  
22  
23  
24  
25  
26  
27  
28  
29  
30  
31  
32  
33  
34  
35  
36  
37  
38  
39  
40  
41  
42  
43  
44  
45  
46  
47  
48  
49  
50  
51  
52  
53  
54  
55  
56  
57  
58  
59  
60

State-specific 11-year FRF-rates are represented in **Figure 1** and **Supplementary Table 1**. Hawaii (HI) (3.02) and Massachusetts (MA) (3.24) had the lowest 11-year FRF-rates, while Louisiana (LA) had the highest at 18.62. DC and 7 states showed a significant declining trend in FRF-rate, while MA and FL documented a significant increase. District of Columbia (DC) had the largest significant annual reduction at -1.067 (6.2 lives-saved per year, p-trend = 0.002) though it had the highest rate of 21.71. Although MA had a low FRF-rate, a significant increase was observed, change=0.074, p-trend=0.008. Florida (FL) also showed an increase, change=0.160, 28.2 lives-lost per year, p-trend=0.016. FRF-rates for Delaware (DL) and Ohio (OH) were 8.89 and 9.10, with a near significant increasing trend, changes of 0.20 and 0.12. FRF-rate in New York (NY) was 5.15 with a change=-0.064, 12.3 lives-saved per year, p-trend=0.006. Illinois (IL) had a significant reduction, change=-0.155, 19.6 lives-saved per year, p-trend=0.025). FRF-rates in CA was -0.166 (59.3 lives-saved per year, p-trend=0.001), Arizona (AZ) at -0.230 (13.4 lives-saved per year, p-trend=0.025) and Nevada (NV) at -0.264 (6.4 lives-saved per year, p-trend = 0.008). Maryland (MA) and North Carolina (NC) had a significant decline: change=-0.169, 9.4 lives-saved per year, p-trend=0.048 and -0.174, 15.3 lives-saved per year, p-trend=0.001).

The 11-year FRF-rates for each state by race are presented in **Figures 2A to 2C** and **Supplementary Figures 1A-C**. Among whites, the lowest rate was in MA with a significant increase from 2000-2010 (change=0.05, p-trend=0.037). FL also recorded a significant increase (change=0.12, p-trend=0.045) but had high 11-year

1  
2  
3 FRF-rate, 10.02. NV recorded the highest and unchanging FRF-rate at 16.30. The  
4  
5  
6 four states that showed a significant declining trend from 2000-2010 were NY  
7  
8 (change=-0.05, p-trend=0.015), IL (change=-0.12, p-trend=0.028), NC (change=-  
9  
10 0.10, p-trend=0.032), and CA (change=-0.12, p-trend=0.001). Among blacks, HI had  
11  
12 the lowest 11-year FRF-rates at 2.93 while Missouri (MO) had the highest at 30.12  
13  
14 and DC was at 40.95. Oklahoma (OK), OH and DL had high 11-year rates at 20.04,  
15  
16 20.19 and 13.61 respectively with a significant increasing changes of 0.93, 0.51 and  
17  
18 0.79, p-trends of 0.008, 0.027 and 0.028 respectively. A declining trend was  
19  
20 observed among blacks in CA (change=-0.58, p-trend=0.042), AZ (change=-0.83, p-  
21  
22 trend=0.019), NV (change=-1.53, p-trend=0.005), NC (change=-0.38, p-  
23  
24 trend=0.024), Indiana (IN) (change=-0.66, p-trend=0.012), Kansas (KA) (change=-  
25  
26 1.07, p-trend=0.021), Minnesota (MN) (change=-0.61, p-trend=0.038), and DC  
27  
28 (change=-1.58, p-trend=0.017), even though their 11-year FRF-rates were high.  
29  
30 Among other races, Texas (TX) (change=-0.19, p-trend=0.033) and CA (change=-  
31  
32 0.10, p-trend=0.009) showed a significant decline.  
33  
34  
35  
36  
37  
38  
39  
40  
41

42 **Figures 3A-B** and **Supplementary Figures 3A-B** presents the 11-year FRF-  
43  
44 rates for each state by ethnicity. Georgia (GA) (change=-0.54, p-trend=0.012), CA  
45  
46 (change=-0.18, p-trend=0.009), Utah (UT) (change=-0.79, p-trend=0.030), AZ  
47  
48 (change=-0.56, p-trend=0.016), and NV (change=-0.48, p-trend=0.007) were five  
49  
50 high-FRF-rate states (>7.13) while NY (change=-0.17, p-trend=0.001), IL (change=-  
51  
52 0.40, p-trend=0.001), TX (change=-0.21, p-trend=0.004), and Oregon (OR)  
53  
54 (change=-0.33, p-trend=0.037) were the four low-FRF-rate states with a significant  
55  
56  
57  
58  
59  
60

1  
2  
3 declining trend among Hispanics. No states demonstrated an increase among  
4  
5  
6 Hispanics, while non-Hispanics showed a significant increasing trend in MA  
7  
8 (change=0.07, p-trend=0.033), Pennsylvania (PA) (change=0.08, p-trend=0.039), OH  
9  
10 (change=0.13, p-trend=0.048), DL (change=0.25, p-trend=0.036), TX (change=0.14,  
11  
12 p-trend=0.022), FL (change=0.23, p-trend=0.002) and OK (change=0.15, p-  
13  
14 trend=0.045). A declining trend in non-Hispanics was observed in MD (change=-  
15  
16 0.16, p-trend=0.068), NC (change=-0.14, p-trend=0.004) and CA (change=-0.15, p-  
17  
18 trend=0.001). In TX, the FRF-rates among Hispanics (change=-0.21, p-trend=0.004)  
19  
20 demonstrated a significant decline and a significant increase among non-Hispanics  
21  
22 (change=0.14, p-trend=0.022) (**Supplementary Table 2**).  
23  
24  
25  
26  
27  
28  
29

30 FRF-rates from 2000-2010 and by intent is provided in **Figures 4A-D** and  
31  
32 **Supplementary Figures 4A-D**. Most of the northern states had low (<3.73)  
33  
34 homicide-FRF while southern states had high FRF. NY (change=-0.05, p-  
35  
36 trend=0.004), IL (change=-0.10, p-trend=0.027), NC (change=-0.10, p-trend=0.023),  
37  
38 NV (change=-0.15, p-trend=0.031) and DC (change=-1.0, p-trend=0.002) had  
39  
40 significant declining trends while MA (change=0.08, p-trend=0.001), Connecticut  
41  
42 (CT) (change=0.08, p-trend=0.023), OH (change=0.12, p-trend=0.006), DL  
43  
44 (change=0.37, p-trend<0.0001) and FL (change=0.15, p-trend=0.007) had  
45  
46 increasing homicide-FRF. A majority of the states had suicide-FRF-rates >5.80; CA  
47  
48 (change=-0.07, p-trend=0.009) and NC (change=-0.07, p-trend=0.037) had declining  
49  
50 trends. Unintentional-FRF-rates showed a significant decreasing trend in three  
51  
52  
53  
54  
55  
56  
57  
58  
59  
60



1  
2  
3  
4  
5  
6  
7  
8  
9  
10  
11  
12  
13  
14  
15  
16  
17  
18  
19  
20  
21  
22  
23  
24  
25  
26  
27  
28  
29  
30  
31  
32  
33  
34  
35  
36  
37  
38  
39  
40  
41  
42  
43  
44  
45  
46  
47  
48  
49  
50  
51  
52  
53  
54  
55  
56  
57  
58  
59  
60

states, OH (change=-0.01, p-trend=0.022), Kentucky (KY) (change=-0.06, p-trend=0.009), and Tennessee (TN) (change=-0.05, p-trend=0.002).

For peer review only

## DISCUSSION

National 11-year FRF-rate from 2000-2010 was 10.21, was almost three times higher than Switzerland and Finland.<sup>17</sup> There were four main observations that emerge from this analysis. First, while overall, blacks had higher national rates than whites and Hispanics had lower national rates than non-Hispanics, the 11-year FRF-rates declined among Hispanics and non-white non-black races with no significant change observed among whites, blacks or non-Hispanics. Second, a substantial inter-state heterogeneity was evidenced by 11-year state-specific FRF-rates being as low as 3.02 in HI to as high as 21.71 in DC. FL and MA recorded an upward FRF trend while AZ, CA, IL, MD, NV, NY, NC and DC had declining FRF-rates during the study period. Third, racial and ethnic variation was shown to drive many of the state-specific variations. Fourth, changes in different FRF-intent also drove many of the state-specific differences.

Firearm deaths increased from 28,663 in 2000 to 31,672 in 2010, about 30,509 deaths per year and no change in rate. These findings are similar to a report by the Bureau of Justice of a rapid decline in firearm homicides from 1993 to 1999 followed by a leveling of rates from 2000-2011.<sup>18</sup> It is important to bear in mind that these endemic conditions are associated with substantial, long-term cumulative health burden associated with firearm death throughout the US.<sup>19</sup> During 2000-2011 there were 306,946 firearm related deaths. With the endemic annual FRF-rate of 10.3, US-population at 338 million by 2020<sup>20</sup> and 10% decadal population

1  
2  
3 increase, we estimate 336,778 firearm related deaths to occur between 2011 and  
4  
5  
6 2020.  
7  
8  
9

10  
11 The 11-year FRF-rates we report among blacks was twice greater than that  
12  
13 of whites and six-times greater than that of other races is in line with reports  
14  
15 showing disproportionately larger firearm fatality and injury rates than whites and  
16  
17 other race.<sup>3 21 22</sup> Although there was a plateau of the national FRF-rates, rates among  
18  
19 Hispanics and non-white non-black races declined and may be explained by the lack  
20  
21 of access to firearms or low firearm ownership among Hispanics and other races.<sup>23</sup>  
22  
23 Our results explain the report where Hispanics were least likely to use firearms for  
24  
25 suicides albeit being more likely to self-injury than any other race groups.<sup>24</sup> Data  
26  
27 from 1981-2010 found that among youths a decline in homicide rates for blacks  
28  
29 between was significantly slower than the declines for Hispanics and other racial  
30  
31 and ethnic groups<sup>25</sup>, suggestive of lower crime.  
32  
33  
34  
35  
36  
37  
38  
39

40  
41 We found 41 states with no FRF-rate change, while 7 states and DC  
42  
43 demonstrated either a significant decline or increase. MA and FL recorded a  
44  
45 significant increase, MA with smallest and FL with largest annual increase while MA  
46  
47 had the lowest 11-year FRF-rate. The Brady Center to Prevent Gun Violence<sup>9</sup>  
48  
49 firearm legislative strength score for 2013, has MA to be third with score of 65  
50  
51 among all states in restrictive firearm legislation, while FL has a score of 3. After MA  
52  
53 passed the toughest firearm-control legislation in 1998, firearm ownership rates  
54  
55 plummeted but violent crimes (476.1 to 468.9) and homicides (2.2 to 3.3) rose.<sup>26</sup>  
56  
57  
58  
59  
60

1  
2  
3 The significant FRF-rate increase in MA may be explained by the influx of firearms  
4 from the two neighboring states (Maine and New Hampshire) with weak firearm  
5 control legislation.<sup>27</sup> FL is a “shall issue”, weak legislature state with just 2 laws to  
6 prevent illegal gun-trafficking.<sup>27</sup> In contrast to the increasing FRF-rates, the  
7 aggregate violent crimes in FL declined from 801.1 to 542.9,<sup>28</sup> emphasizing a  
8 particularly concerning public health problem of increasing gun violence even in a  
9 climate of reducing violence.  
10  
11  
12  
13  
14  
15  
16  
17  
18  
19  
20  
21

22 CA, NY, IL, AZ, NV, MD, NC, and DC had declining trends but the most marked  
23 reduction was observed in CA and may be directly linked to strength of firearm  
24 legislature, a score of 81.<sup>9</sup> CA has eight state laws to prevent illegal gun trafficking<sup>27</sup>  
25 and a reduction in homicide crime rate in CA by 25.4% from 2001-2010.<sup>29</sup> An  
26 emergency department study from 2004-2008 reporting reduction of firearm death  
27 rate in CA echoing the results of our study.<sup>30</sup> NY and IL had similar trend profiles  
28 and an overall decline in FRF-rates, but the Brady scores were 62 and 35<sup>9</sup> with 10  
29 and 8 policies preventing illegal firearm trafficking respectively.<sup>27</sup> FRF-rate  
30 reduction in AZ and NV is in contrast to CA and NY, having no laws preventing illegal  
31 gun trafficking,<sup>27</sup> with Brady scores 0 and 5 respectively.<sup>9</sup> In AZ violent crime rate  
32 dropped from 544.5 offenses in 2002 to 372.2 in 2010,<sup>31 32</sup> and NV had reductions in  
33 index crimes.<sup>33</sup> This reduction and our results may be attributed to policing  
34 strategies.<sup>34</sup> Our reported reduction in firearm death rates in DC may be attributed  
35 to 9 laws preventing illegal gun trafficking.<sup>27</sup> Firearm policies are not stringent in  
36 NC, strength of firearm legislature being 16<sup>9</sup> with only 5 illegal gun trafficking  
37  
38  
39  
40  
41  
42  
43  
44  
45  
46  
47  
48  
49  
50  
51  
52  
53  
54  
55  
56  
57  
58  
59  
60

1  
2  
3 laws.<sup>27</sup> However, the violent crime rate in NC dropped from 493 to 363 from 2000-  
4  
5  
6 2010,<sup>35</sup> suggesting that the factors that led to reduction in crime rates may have also  
7  
8 driven FRF-rate reduction.  
9

10  
11  
12 We found that the state-specific increasing trend in FL was driven by an  
13  
14 increase among whites, blacks and non-Hispanics and can be explained by violent  
15  
16 crime rates in FL which ranks 4<sup>th</sup> in violent crime.<sup>36</sup> The racial gap in arrests for  
17  
18 major crimes widened in FL from 2000-2010: 6,175 blacks and 6,071 whites were  
19  
20 arrested in 2000 to 2,398 and 3,192 in 2010.<sup>37</sup> The increase in FRF-rates in MA  
21  
22 driven by whites and non-Hispanics is in contrast to the racial differences observed  
23  
24 in violent deaths with non-Hispanic blacks having the highest rate of 21.6 as  
25  
26 compared to 4.9 among whites.<sup>38</sup> MA has relatively low violent crime rate (ranks  
27  
28 20<sup>th</sup> in US),<sup>36</sup> and stringent firearm control.<sup>9</sup> Even though nationally no significant  
29  
30 reduction in FRF-rates among blacks was observed in our study, FRF-rates among  
31  
32 blacks drove the state-specific declines in AZ, NV, CA, NC and DC. Declining trends  
33  
34 among Hispanics in AZ, NV, CA, NY and IL contributing to state-specific declines may  
35  
36 be due to a combination of low firearm ownership<sup>23</sup> and racially targeted crime-  
37  
38 control activities.<sup>39</sup> In IN, KS, MN and OK, with no statewide reduction, the FRF-rates  
39  
40 fell solely among blacks, with no change among whites. These states have very few  
41  
42 laws to prevent firearm violence and trafficking<sup>27</sup> and rank among the highest  
43  
44  
45  
46  
47  
48  
49  
50  
51  
52  
53  
54  
55  
56  
57  
58  
59  
60  
twenty states in crime rates except MN.<sup>36</sup>

1  
2  
3  
4  
5  
6  
7  
8  
9  
10  
11  
12  
13  
14  
15  
16  
17  
18  
19  
20  
21  
22  
23  
24  
25  
26  
27  
28  
29  
30  
31  
32  
33  
34  
35  
36  
37  
38  
39  
40  
41  
42  
43  
44  
45  
46  
47  
48  
49  
50  
51  
52  
53  
54  
55  
56  
57  
58  
59  
60

The increasing trend in FL and MA in our study was due to increase in firearm homicides. According to data from CDC, rates of suicides in FL remained constant from 2000-2010 while in MA these rates doubled from 1.92 to 3.15.<sup>1</sup> In 2010, 71% of homicides in FL were by firearms,<sup>28</sup> and in MA, 22% of the homicides were by firearm.<sup>38</sup> In CA, where all racial and ethnic groups revealing declining trends, was driven by reduction in suicide-FRF and is associated with the states' increased effort in implementing "The Mental Health Services Act" to reduce suicide rates.<sup>40</sup> In our study, reduction in homicides was caused by declines in AZ, IL, NV, NY, NC and DC. These declining patterns are similar to the reduction in all-cause homicide rates from 2000-2010 that occurred in a smaller magnitude among AZ, IL, NV, NY, NC and in a much larger magnitude in DC.<sup>1</sup>

There are several limitations in our study. Under reporting of firearm fatal events is a known phenomenon and a limitation of this study, which cannot be verified. There is, however, no reason to suspect that blacks and Hispanics are more likely than whites and non-Hispanic individuals to have a fatal firearm injury misclassified on the death certificate, so this under-reporting should not have biased our findings. Another limitation is that, despite the considerable state-specific heterogeneity, the actual variation in firearm mortality may be a feature of cities and counties with varying crime rates, and we do not address the variation existing at such level. Finally, comparisons made between other races may not be usefully interpreted due to the heterogeneity and the small frequency of events in this sub-

1  
2  
3 population. However, as other race makes up about 10% of the US population, the  
4  
5 results are discussed in relation to blacks and Hispanics.  
6  
7  
8  
9

10  
11 In summary, we showed no change in national firearm mortality rates during  
12  
13 2000-2010, but showed distinct state-specific patterns with racial and ethnic  
14  
15 variation and by intent. The distinctive state-specific firearm fatality profiles vary by  
16  
17 race, ethnicity and intent adding another layer of complexity to the FRF trends. This  
18  
19 calls for specific studies to identify the drivers of the state-specific temporal trends  
20  
21 followed by introducing tailored programs that target specific racial and ethnic  
22  
23 groups in specific states.  
24  
25  
26  
27  
28  
29  
30  
31  
32  
33  
34  
35  
36  
37  
38  
39  
40  
41  
42  
43  
44  
45  
46  
47  
48  
49  
50  
51  
52  
53  
54  
55  
56  
57  
58  
59  
60

**Table 1: Trends in firearm deaths in the United States, WISQARS 2000-2010.**

|                             | Age-adjusted firearm deaths per 100,000 population |       |       |       |       |       |       |       |       |       |       |       | Change  |                |       |         |
|-----------------------------|----------------------------------------------------|-------|-------|-------|-------|-------|-------|-------|-------|-------|-------|-------|---------|----------------|-------|---------|
|                             | 2000                                               | 2001  | 2002  | 2003  | 2004  | 2005  | 2006  | 2007  | 2008  | 2009  | 2010  | Total | Annual  | 95% CI         | SMD   | P-trend |
| All                         | 10.14                                              | 10.31 | 10.43 | 10.29 | 9.99  | 10.27 | 10.22 | 10.24 | 10.23 | 10.05 | 10.07 | 10.21 | -0.017  | -0.044, 0.010  | -0.44 | 0.181   |
| <b>Race</b>                 |                                                    |       |       |       |       |       |       |       |       |       |       |       |         |                |       |         |
| White                       | 8.97                                               | 9.21  | 9.19  | 9.05  | 8.84  | 8.98  | 8.80  | 8.98  | 9.18  | 9.13  | 9.20  | 9.05  | 0.006   | -0.027, 0.039  | 0.11  | 0.705   |
| Black                       | 18.30                                              | 18.32 | 19.22 | 19.01 | 18.31 | 19.34 | 19.98 | 19.31 | 18.19 | 17.15 | 16.90 | 18.51 | -0.114  | -0.311, 0.082  | -0.40 | 0.220   |
| Other                       | 4.76                                               | 3.89  | 4.19  | 4.03  | 3.70  | 3.88  | 3.83  | 3.38  | 3.25  | 3.37  | 3.25  | 3.38  | -0.121  | -0.166, -0.076 | -1.83 | <0.0001 |
| <b>Ethnicity</b>            |                                                    |       |       |       |       |       |       |       |       |       |       |       |         |                |       |         |
| Hispanic                    | 7.81                                               | 7.73  | 7.63  | 7.68  | 7.42  | 7.51  | 7.19  | 7.21  | 6.60  | 6.38  | 5.86  | 7.13  | -0.179  | -0.236, -0.122 | -2.13 | <0.0001 |
| Non-Hispanic                | 10.31                                              | 10.50 | 10.67 | 10.50 | 10.23 | 10.53 | 10.54 | 10.61 | 10.74 | 10.55 | 10.71 | 10.54 | 0.027   | -0.002, 0.056  | 0.63  | 0.068   |
| <b>Intent</b>               |                                                    |       |       |       |       |       |       |       |       |       |       |       |         |                |       |         |
| Homicide/Legal Intervention | 3.88                                               | 4.05  | 4.17  | 4.19  | 4.05  | 4.28  | 4.40  | 4.32  | 4.14  | 3.89  | 3.73  | 4.10  | -0.008  | -0.054, 0.038  | -0.12 | 0.705   |
| Suicide                     | 5.90                                               | 5.90  | 5.92  | 5.77  | 5.65  | 5.66  | 5.54  | 5.63  | 5.82  | 5.91  | 6.06  | 5.80  | 0.001   | -0.035, 0.038  | 0.03  | 0.932   |
| Undetermined                | 0.08                                               | 0.08  | 0.08  | 0.08  | 0.08  | 0.07  | 0.07  | 0.09  | 0.09  | 0.07  | 0.08  | 0.08  | -0.0001 | -0.002, 0.002  | -0.02 | 0.944   |
| Unintentional               | 0.27                                               | 0.28  | 0.26  | 0.25  | 0.22  | 0.27  | 0.21  | 0.20  | 0.19  | 0.18  | 0.20  | 0.23  | -0.010  | -0.014, -0.006 | -1.70 | <0.0001 |

All values are age-adjusted rates per 100,000 persons. Change denotes annual change in rate per 100,000. Negative value indicates decline in firearm death rates per 100,000 from 2000-2010 and positive value indicates increase in firearm death rate per 100,000 from 2000-2010. CI denotes confidence intervals of the annual change in firearm death rate per 100,000. SMD indicates standardized mean difference; is equal to annual change/standard deviation. P-trend calculated using meta-regression indicates the significance of the decline or the increase in firearm related death rates from 2000-2010. Data are from Center for Disease Control and Prevention (CDC)'s National center for Injury Prevention and Control Web-based Injury Statistics Query and Reporting System (WISQARS).



**Contributorship:**

Galea and Kalesan conceived and supervised the study. Kalesan and Vasan completed the analyses. Kalesan, Galea and Villarreal led the writing. Fagan, Teperman, Mobily and Hlavacek assisted with the study and analyses. Hlavacek assisted with obtaining state gun laws.

**Competing interests:**

None of the authors have competing interests to report

**Funding:**

There was no funding for this project

**Data sharing:**

No additional data are available

## REFERENCES

1. Centers for Disease Control and Prevention NCFIPaC. Web-based Injury Statistics Query and Reporting System (WISQARS). Atlanta, GA: National Center for Injury Prevention and Control, 2005.
2. Murphy SL, Jiaquan X, K.D. K. Deaths: Final Data for 2010. *National Vital Statistics Reports*, 2013;1-168.
3. Ikeda RM, Gorwitz R, James SP, et al. Trends in fatal firearm-related injuries, United States, 1962-1993. *American journal of preventive medicine* 1997;13(5):396-400.
4. Gotsch KE, Annest JL, Mercy JA, et al. Surveillance for Fatal and Nonfatal Firearm-Related Injuries --- United States, 1993--1998. *MMWR Surveill Summ* 2001;50:1-32.
5. Harris AR, Fisher GA, Thomas SH. Homicide as a medical outcome: racial disparity in deaths from assault in US Level I and II trauma centers. *The journal of trauma and acute care surgery* 2012;72(3):773-82.
6. Kellermann AL, Rivara FP, Rushforth NB, et al. Gun Ownership as a Risk Factor for Homicide in the Home. *New England Journal of Medicine* 1993;329(15):1084-91.
7. Firearm injury in the U.S. PA: Firearm & Injury Center at Penn, 2011.
8. Fleegler EW, Lee LK, Monuteaux MC, et al. Firearm Legislation and Firearm-Related Fatalities in the United States. *Jama Intern Med* 2013;173(9):732-40.
9. 2013 State Scorecard. In: Violence BCtPGVaLCtPG, editor. *Score Card*. Washington, DC, 2013.
10. Phillips JA. Factors associated with temporal and spatial patterns in suicide rates across U.S. states, 1976-2000. *Demography* 2013;50(2):591-614.
11. Hoyert DL, Arias E, Smith B, Murphy SL, et al. Deaths: Final Data for 1999. *National vital statistics reports*. Hyattsville, Maryland: National Center for Health Statistics, 2001.
12. Egger M, Smith GD, Altman D. *Systematic Reviews in Health Care: Meta-analysis in Context*. London: BMJ Books, 2001.
13. Higgins JP, Thompson SG. Quantifying heterogeneity in a meta-analysis. *Statistics in medicine* 2002;21(11):1539-58.
14. Higgins JP, Thompson SG, Deeks JJ, et al. Measuring inconsistency in meta-analyses. *BMJ* 2003;327(7414):557-60.
15. Cohen J. A power primer. *Psychological bulletin* 1992;112(1):155-9.
16. Rosenthal R, Rubin DB. A simple, general purpose display of magnitude of experimental effect. *J Educ Psychol* 1982;74(2):166-69.
17. Bangalore S, Messerli FH. Gun Ownership and Firearm-related Deaths. *The American journal of medicine* 2013;126(10):873-6.
18. Planty M, Truman JL. Firearm Violence, 1993-2011. U.S. Department of Justice: Bureau of Justice Statistics, 2013.
19. Christoffel KK. Firearm injuries: epidemic then, endemic now. *American journal of public health* 2007;97(4):626-9.

- 1
  - 2
  - 3
  - 4
  - 5
  - 6
  - 7
  - 8
  - 9
  - 10
  - 11
  - 12
  - 13
  - 14
  - 15
  - 16
  - 17
  - 18
  - 19
  - 20
  - 21
  - 22
  - 23
  - 24
  - 25
  - 26
  - 27
  - 28
  - 29
  - 30
  - 31
  - 32
  - 33
  - 34
  - 35
  - 36
  - 37
  - 38
  - 39
  - 40
  - 41
  - 42
  - 43
  - 44
  - 45
  - 46
  - 47
  - 48
  - 49
  - 50
  - 51
  - 52
  - 53
  - 54
  - 55
  - 56
  - 57
  - 58
  - 59
  - 60
20. Nygaard DF. World population projections, 2020. *A 2020 vision for food, agriculture and the environment*. Washington DC: International Food Policy Research Institute, 1994.
21. Cherry D, Annest JL, Mercy JA, et al. Trends in nonfatal and fatal firearm-related injury rates in the United States, 1985-1995. *Annals of emergency medicine* 1998;32(1):51-9.
22. Kalesan B, French C, Fagan JA, et al. Firearm-related Hospitalizations and In-Hospital Mortality in the United States, 2000-2010. *American journal of epidemiology* 2013.
23. Schwebel DC, Lewis T, Simon TR, et al. Prevalence and Correlates of Firearm Ownership in the Homes of Fifth Graders: Birmingham, AL, Houston, TX, and Los Angeles, CA. *Health education & behavior : the official publication of the Society for Public Health Education* 2014.
24. Suicides and Self-Injury by Firearm. In: Bureau of Health Statistics and Research DoH, editor. Pennsylvania: Pennsylvania Department of Health, 2006.
25. David-Ferdon C, Dahlberg LL, Kegler SR. Homicide rates among persons aged 10-24 years - United States, 1981-2010. *MMWR. Morbidity and mortality weekly report* 2013;62(27):545-8.
26. (NIBRS) NI-BRS. National Incident-Based Reporting System (NIBRS). Commonwealth of Massachusetts, 2013.
27. Guns TT. Top Sources of Crime Guns in America, 2010.
28. Crime in Florida, Florida uniform crime report. In: (1992-2012). FSACF, editor. Tallahassee, FL: Florida Statistical Analysis Center: FDLE, 2013.
29. Harris KD. Homicide in California 2010. California: California Department of Justice, 2010.
30. Coyne-Beasley T, Lees AC. Fatal and nonfatal firearm injuries in North Carolina. *North Carolina medical journal* 2010;71(6):565-8.
31. Halliday RC. Crime in Arizona 2002. *An annual report compiled by Access Integrity Unit of the Arizona Department of Public Safety*. Phoenix, AZ: Arizona Department of Public Safety, 2002.
32. Halliday RC. Crime in Arizona 2010. *An annual report compiled by Access Integrity Unit of the Arizona Department of Public Safety*. Phoenix, AZ: Arizona Department of Public Safety, 2010.
33. Crime in Nevada 2010. In: Safety NDoP, editor. *Crime in Nevada: State of Nevada, Department of Public Safety*, 2012.
34. Assistance BoJ. Reducing Crime Through Intelligence-Led Policing. Washington, D.C: Office of Justice Programs, US Department of Justice, 2012:24-26.
35. Medlin L, Davis J. Scorecard on Crime and Justice in North Carolina: Criminal Justice Analysis Center, 2012.
36. Crime in the United States, 2006. Retrieved (April 14, 2014), from <http://www.fbi.gov/about-us/cjis/ucr/crime-in-the-u.s/2006>. In: United States Department of Justice FBI, editor, 2007.
37. Part I and II Arrests for Florida by Age, Sex, and Race. *Annual Crime in Florida*. FL: Florida Department of Law Enforcement, 2012.
38. Violent Deaths in Massachusetts: Surveillance Update 2010: Massachusetts Department of Public Health, 2013.

- 1  
2  
3  
4 39. J.M S. Maintaining racial inequality through crime control: mass incarceration  
5 and residential segregation. *Contemp Justice Review* 2012;15(4):469-84.  
6  
7 40. Clark W, Welch SN, Berry SH, et al. California's historic effort to reduce the  
8 stigma of mental illness: the Mental Health Services Act. *American journal of*  
9 *public health* 2013;103(5):786-94.  
10  
11  
12  
13  
14  
15  
16  
17  
18  
19  
20  
21  
22  
23  
24  
25  
26  
27  
28  
29  
30  
31  
32  
33  
34  
35  
36  
37  
38  
39  
40  
41  
42  
43  
44  
45  
46  
47  
48  
49  
50  
51  
52  
53  
54  
55  
56  
57  
58  
59  
60

For peer review only

## Figure legends

### Figure 1: Firearm related fatality rates from 2000-2010.

Firearm related fatality rates are 11-year cumulative age-adjusted rates per 100,000 persons from 2000 to 2010 for each of the 50 states and District of Columbia ranging from 3.02 (HI) to 21.71 (DC) per 100,000. The colors represent increasing rates from blue to red. Significant decline in 7 states (AZ, CA, IL, MD, NV, NY and NC and DC) are represented as gold stars and significant increase in FL and MA as black stars within the map and in the table.

The table summarizes the rates per 100,000, annual change in rate and p-trend for those states that show significant increase or decrease. "FRF" denotes firearm related fatality. "Change" indicates the annual change in rates from 2000 to 2010. "P-trend" indicates the significance of the decline or the increase in firearm related fatality rates from 2000 to 2010 and was calculated using meta-regression. Negative values for change indicate a decrease while positive values indicate increase in rates across the years. The intent-specific rates of firearm related fatality is denoted with arrows in the table below: downward arrow denotes reduction in rates, upward arrows indicate an increase and two-way arrows indicate no change. "ne" represents data which cannot be estimated due to frequency <10. HI (11-year=3.02, change=-0.057, p-trend=0.36) and AK (11-year=18.09, change=0.10, p-trend=0.64) are not represented in the map.

### Figure 2: Firearm related fatality rates from 2000-2010 according to race.

#### Whites:

Firearm related fatality rates are 11-year cumulative age-adjusted rates per 100,000 persons from 2000 to 2010 for each of the 50 states and District of Columbia; ranging from 2.57 (MA) to 16.30 (NV) per 100,000. The colors represent increasing rates from blue to red. White represents no data or states where the frequency was <10 among whites. Significant decline in 4 states (CA, NY, IL and NC) are represented as gold stars and significant increase in MA and FL as black stars. HI (11-year=4.29, change=0.03, p-trend=0.84) and AK (11-year=15.77, change=0.15, p-trend=0.56) are not represented in the map.

#### Blacks:

Firearm related fatality rates are 11-year cumulative age-adjusted rates per 100,000 persons from 2000 to 2010 for each of the 50 states and District of Columbia; ranging from 2.93 (HI) to 40.95 (DC) per 100,000. The colors represent increasing rates from blue to red. White represents no data or states where the frequency was <10 among blacks. Significant decline in 8 states (CA, NV, AZ, KA, MN, IN, NC and DC) are represented as gold stars and significant increase in OK, OH and DL as black stars. HI (11-year=2.93) and AK (11-year=12.36) are not represented in the map.

#### Other race:

1  
2  
3  
4  
5  
6  
7  
8  
9  
10  
11  
12  
13  
14  
15  
16  
17  
18  
19  
20  
21  
22  
23  
24  
25  
26  
27  
28  
29  
30  
31  
32  
33  
34  
35  
36  
37  
38  
39  
40  
41  
42  
43  
44  
45  
46  
47  
48  
49  
50  
51  
52  
53  
54  
55  
56  
57  
58  
59  
60

Firearm related fatality rates are 11-year cumulative age-adjusted rates per 100,000 persons from 2000 to 2010 for each of the 50 states and District of Columbia; ranging from 0.82 (NY) to 22.54 (AK) per 100,000. The colors represent increasing rates from blue to red. White represents no data or states where the frequency was <10 among other race. Significant decline in 2 states (CA and TX) are represented as gold stars and there were no states with significant increase. HI (11-year=2.18, change=-0.04, p-trend=0.50) and AK (11-year=22.54, change=-0.15, p-trend=0.75) are not represented in the map.

**Figure 3: Firearm related fatality rates from 2000-2010 according to ethnicity.**

**Hispanic:**

Firearm related fatality rates are 11-year cumulative age-adjusted rates per 100,000 persons from 2000 to 2010 for each of the 50 states and District of Columbia; ranging from 3.13 (NJ) to 15.63 (ND) per 100,000. The colors represent increasing rates from blue to red. White represents no data or states where the frequency was <10 among Hispanics. Significant decline in 9 states (CA, AZ, NV, OR, UT, TX, IL, GA and NY) are represented as gold stars and there were no states with significant increase. HI (11-year=3.84) and AK (11-year=8.95) are not represented in the map.

**Non-Hispanic:**

Firearm related fatality rates are 11-year cumulative age-adjusted rates per 100,000 persons from 2000 to 2010 for each of the 50 states and District of Columbia; ranging from 2.95 (HI) to 23.45 (DC) per 100,000. The colors represent increasing rates from blue to red. White represents no data or states where the frequency was <10 among non-Hispanics. Significant decline in 3 states (CA, NC and DC) are represented as gold stars and significant increase in 7 states (TX, OK, FL, OH, PA, DL, and MA) as black stars. HI (11-year=2.95, change=-0.05, p-trend=0.50) and AK (11-year=18.44, change=0.13, p-trend=0.57) are not represented in the map.

**Figure 4: Firearm related fatality rates from 2000-2010 according to intent.**

**Homicide:**

Firearm related fatality rates are 11-year cumulative age-adjusted rates per 100,000 persons from 2000 to 2010 for each of the 50 states and District of Columbia; ranging from 0.65 (NH) to 19.75 (DC) per 100,000. The colors represent increasing rates from blue to red. White represents no data or states where the frequency was <10. Significant decline in 5 states (NV, IL, NC, NY and DC) are represented as gold stars and significant increase in MO, FL, OH, MA, CT, and DL as black stars. HI (11-year=0.79, change=-0.01, p-trend=0.68) and AK (11-year=3.54, change=0.001, p-trend=0.95) are not represented in the map.

**Suicide:**

Firearm related fatality rates are 11-year cumulative age-adjusted rates per 100,000 persons from 2000 to 2010 for each of the 50 states and District of Columbia; ranging from 1.61 (MA) to 13.79 (AK) per 100,000. The colors represent increasing



1  
2  
3 rates from blue to red. White represents no data or states where the frequency was  
4 <10. Significant decline in 2 states (CA and NC) are represented as gold stars and  
5 there were no states with significant increase. HI (11-year=2.10, change=-0.001, p-  
6 trend=0.95) and AK (11-year=13.79, change=0.11, p-trend=0.61) are not  
7 represented in the map.  
8  
9

10  
11 **Undetermined:**

12 Firearm related fatality rates are 11-year cumulative age-adjusted rates per 100,000  
13 persons from 2000 to 2010 for each of the 50 states and District of Columbia;  
14 ranging from 0.01 (NJ) to 0.47 (AK) per 100,000. The colors represent increasing  
15 rates from blue to red. White represents no data or states where the frequency was  
16 <10. There was no significant decline or increasing state-specific trends. HI (11-  
17 year=ne) and AK (11-year=0.47) are not represented in the map.  
18  
19

20  
21 **Unintentional:**

22 Firearm related fatality rates are 11-year cumulative age-adjusted rates per 100,000  
23 persons from 2000 to 2010 for each of the 50 states and District of Columbia;  
24 ranging from 0.04 (MA) to 0.83 (LO) per 100,000. The colors represent increasing  
25 rates from blue to red. White represents no data or states where the frequency was  
26 <10. Significant decline in 3 states (OH, KN and TN) are represented as gold stars  
27 and there were no states with significant increase. HI (11-year=0.08) and AK (11-  
28 year=0.29) are not represented in the map.  
29  
30

31 **Supplementary Figure 1A:**

32  
33 Firearm deaths from 2000 to 2010 by U.S census regions among whites  
34  
35

36 **Supplementary Figure 1B:**

37  
38 Firearm deaths from 2000 to 2010 by U.S census regions among blacks  
39  
40

41 **Supplementary Figure 1C:**

42  
43 Firearm deaths from 2000 to 2010 by U.S census regions among other race  
44  
45

46 **Supplementary Figure 2A:**

47  
48 Firearm deaths from 2000 to 2010 by U.S census regions among hispanics  
49  
50

51 **Supplementary Figure 2B:**

52  
53 Firearm deaths from 2000 to 2010 by U.S census regions among non-hispanics  
54  
55

56 **Supplementary Figure 3A:**

57  
58 Firearm deaths due to homicide from 2000 to 2010 by U.S census regions  
59  
60

1  
2  
3 **Supplementary Figure 3B:**  
4

5 Firearm deaths due to suicides from 2000 to 2010 by U.S census regions  
6  
7

8 **Supplementary Figure 3C:**  
9

10 Undetermined firearm deaths from 2000 to 2010 by U.S census regions  
11  
12

13 **Supplementary Figure 3D:**  
14

15 Unintentional firearm deaths from 2000 to 2010 by U.S census regions  
16  
17  
18  
19  
20  
21  
22  
23  
24  
25  
26  
27  
28  
29  
30  
31  
32  
33  
34  
35  
36  
37  
38  
39  
40  
41  
42  
43  
44  
45  
46  
47  
48  
49  
50  
51  
52  
53  
54  
55  
56  
57  
58  
59  
60



1  
2  
3  
4  
5  
6  
7  
8 | ~~May-July 0210~~, 2014  
9

10  
11 | **Title: State-specific, ~~and racial/~~and ethnic heterogeneity in trends of firearm-**  
12 **related fatality rates in the United States from 2000-2010**  
13

14 Corresponding author:

15 Bindu Kalesan  
16 Department of Surgery & Epidemiology,  
17 Columbia University,  
18 650 W 168<sup>th</sup> Street Room 210  
19 New York, NY, USA  
20 Email: [kb2693@cumc.columbia.edu](mailto:kb2693@cumc.columbia.edu)  
21 Tel: 212-305-8880  
22

23 Co-authors:

24 Sowmya Vasani  
25 Department of Surgery,  
26 Columbia University,  
27 New York, NY, USA  
28 Email: [sv2436@cumc.columbia.edu](mailto:sv2436@cumc.columbia.edu)  
29

30 Matthew E Mobily

31 Department of Epidemiology,  
32 Columbia University,  
33 New York, NY, USA  
34 Email: [mem2292@columbia.edu](mailto:mem2292@columbia.edu)  
35

36 Marcos D Villarreal

37 Department of Epidemiology,  
38 Columbia University,  
39 New York, NY, USA  
40 Email: [mdv2119@columbia.edu](mailto:mdv2119@columbia.edu)  
41

42 Patrick Hlavacek

43 Department of Epidemiology,  
44 Columbia University,  
45 New York, NY, USA  
46 Email: [ph2394@columbia.edu](mailto:ph2394@columbia.edu)  
47

48 Sheldon Teperman

49 Trauma and Critical Care Services,  
50 Jacobi Medical Center  
51 Bronx, NY, USA  
52 Email: [Sheldon.Teperman@nbhn.net](mailto:Sheldon.Teperman@nbhn.net)  
53  
54

1  
2  
3  
4  
5  
6  
7  
8 Jeffrey A Fagan  
9 Department of Law & Epidemiology,  
10 Columbia University,  
11 New York, NY, USA  
12 Email: [jfagan@law.columbia.edu](mailto:jfagan@law.columbia.edu)  
13

14 Sandro Galea  
15 Department of Epidemiology,  
16 Columbia University,  
17 New York, NY, USA  
18 Email: [sgalea@cumc.columbia.edu](mailto:sgalea@cumc.columbia.edu)  
19

20  
21  
22  
23  
24 Keywords: firearms, temporal trends, mortality

25  
26 | Word count: ~~3000~~2964  
27  
28  
29  
30  
31

32 ~~Galea and Kalesan conceived and supervised the study. Kalesan and Vasani~~  
33 ~~completed the analyses. Kalesan, Galea and Villarreal led the writing. Fagan,~~  
34 ~~Teperman, Mobily and Hlavacek assisted with the study and analyses. Hlavacek~~  
35 ~~assisted with obtaining state gun laws.~~  
36  
37  
38  
39  
40  
41  
42  
43  
44  
45  
46  
47  
48  
49  
50  
51  
52  
53  
54

1  
2  
3  
4  
5  
6  
7  
8  
9  
10  
11  
12  
13  
14  
15  
16  
17  
18  
19  
20  
21  
22  
23  
24  
25  
26  
27  
28  
29  
30  
31  
32  
33  
34  
35  
36  
37  
38  
39  
40  
41  
42  
43  
44  
45  
46  
47  
48  
49  
50  
51  
52  
53  
54  
55  
56  
57  
58  
59  
60

|

For peer review only

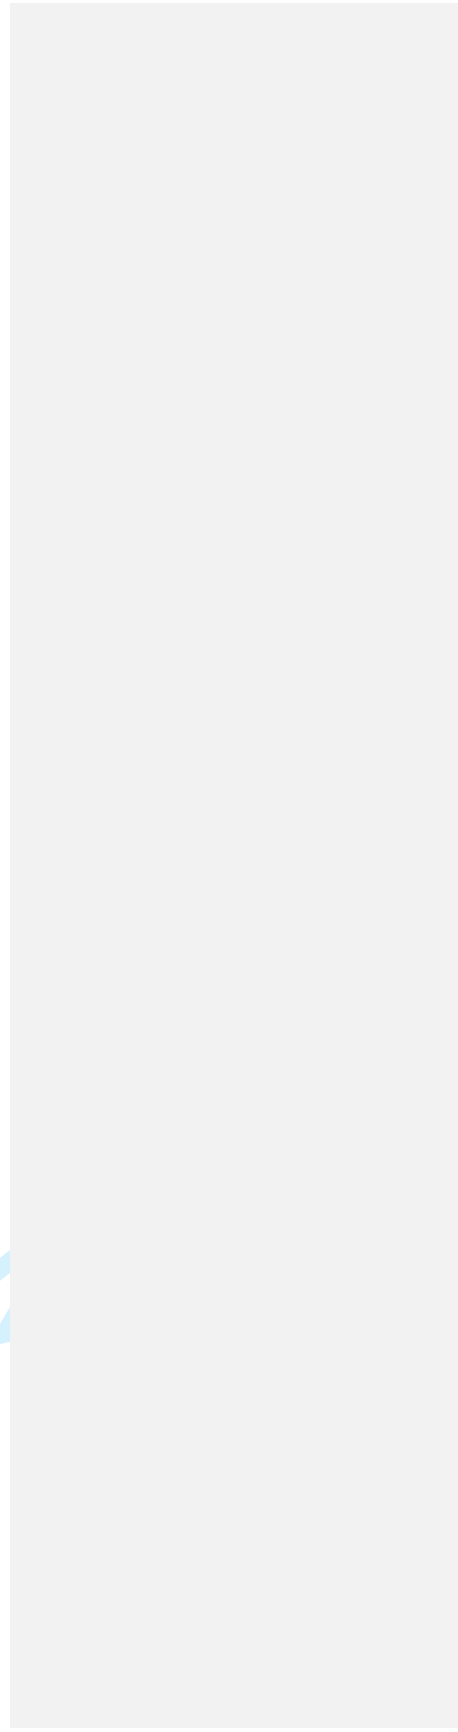

**Abstract:**

**Objectives:** To document overall, racial, ~~and~~ ethnic and intent-specific spatio-temporal trends of firearm related fatality rates (FRF-rate) in the United States.

**Design:** Cross-sectional study per year from 2000 to 2010.

**Setting:** United States.

**Participants:** ~~Aggregate count of a~~All people in the US from 2000 to 2010.

**Outcome measures:** Data from the Web-based Injury Statistics Query and Reporting System from 2000-2010 was used to determine annual FRF-rates per 100,000 and by states, race, ~~and~~ ethnicity and intent.

**Results:** ~~The average n~~National 11-year FRF-rate was 10.21 per 100,000, from 3.02 to in Hawaii to 18.62 in Louisiana: 60% of states had higher than national rates and 41 states showed no temporal change. ~~The average n~~National FRF-rates among blacks and whites were 18.51 and 9.05 per 100,000 and among Hispanics and non-Hispanics were 7.13 and 10.13 per 100,000; Hispanics had a decreasing change of -0.18, p-trend<0.0001. In states with increasing trends (Florida and Massachusetts), whites and non-Hispanics drove the rise; while in states with decreasing trends (California, North Carolina, Arizona, Nevada, New York, Illinois, ~~Maryland~~), Hispanics and blacks drove the fall. ~~The average n~~National FRF-rates due to homicides (4.1 per 100,000) and suicides (5.8 per 100,000) remained constant, but varied between states.

**Conclusion:** Endemic national FRF-rates mask a wide variation in time trends between states. FRF-rates were twice as high in blacks than whites but decreased

1  
2  
3  
4  
5  
6  
7  
8 among Hispanics. Efforts to identify state-specific best practices can contribute to  
9  
10 changes in national FRF-rates that remain high.  
11  
12  
13  
14  
15  
16  
17  
18  
19  
20  
21

### 22 **Strengths of this study**

- 23 • This study uses the best available data reporting system for surveillance of  
24 firearm mortality in US.
- 25 • Brings into light the overall state-specific variability of temporal trends of  
26 firearm mortality, which was obscured by the endemic national firearm  
27 fatality rates during 2000-2010 and according to race, ethnicity and intent  
28 from a seemingly stable national burden of firearm deaths.
- 29 • This is the first report that documents firearm fatality trends by ethnicity
- 30 • Our results call for identification of drivers of state-specific temporal  
31 trends to introduce tailored programs targeted to reduce deaths and  
32 injury due to firearms.  
33

### 34 **Limitations of this study**

- 35 • Possible under reporting of firearm fatal events, which cannot be verified.
- 36 • Despite the considerable state-specific heterogeneity, the actual variation  
37 in firearm mortality may be a feature of cities and counties with varying  
38 crime rates, and we do not address the variation existing at such level.
- 39 • Finally, comparisons made between other races may not be usefully  
40 interpreted due to the heterogeneity and the small frequency of events in  
41 this sub-population.  
42  
43  
44  
45  
46  
47  
48  
49  
50  
51  
52  
53  
54

1  
2  
3  
4  
5  
6  
7  
8  
9  
10  
11  
12  
13  
14  
15  
16  
17  
18  
19  
20  
21  
22  
23  
24  
25  
26  
27  
28  
29  
30  
31  
32  
33  
34  
35  
36  
37  
38  
39  
40  
41  
42  
43  
44  
45  
46  
47  
48  
49  
50  
51  
52  
53  
54  
55  
56  
57  
58  
59  
60

Firearm violence increased during the 1980s and peaked in 1993, with 39,595 firearm deaths in the US and a firearm-related fatality rate (FRF-rate) of 15.0 per 100,000.<sup>1</sup> Since the turn of the 21<sup>st</sup> century, FRF-rates in the US have become endemic around 10.3 per 100,000 accounting for 17.5% of all injury deaths,<sup>2</sup> while the intent of firearm deaths was mainly suicide and homicide.<sup>3</sup>

The FRF-rate in 1993 among blacks was three-times greater than whites, but similar among Hispanics and non-Hispanics.<sup>1,4</sup> The overall fall in FRF after 2000 corresponded to a related narrowing of the racial gap between blacks and whites, where, by 2010, the FRF-rates among blacks was twice greater than whites.<sup>1</sup> Several factors have been posited that might explain these persistent racial differences, including socioeconomic determinants and increased firearm availability.<sup>5,6</sup>

Although the national temporal trends in FRF have been previously well documented,<sup>3,7,8</sup> there is ample reason to suspect substantial heterogeneity in FRF across states, such as dramatic differences in gun laws controlling access to firearms, variability in enforcement of national standards across states,<sup>8,9</sup> changing demographics and violence.<sup>10</sup> It is likely that some of the state-to-state heterogeneity in the potential determinants of FRF may also contribute to variability in racial and ethnic differences in FRF within states.

With this in mind, this study had two distinct aims. First, we aimed to document national and state-specific trends in FRF-rates along with the annual change in FRF-rates from 2000-2010 and second, to determine the racial, ethnic and

1  
2  
3  
4  
5  
6  
7  
8  
9  
10  
11  
12  
13  
14  
15  
16  
17  
18  
19  
20  
21  
22  
23  
24  
25  
26  
27  
28  
29  
30  
31  
32  
33  
34  
35  
36  
37  
38  
39  
40  
41  
42  
43  
44  
45  
46  
47  
48  
49  
50  
51  
52  
53  
54  
55  
56  
57  
58  
59  
60

intent-specific differences in FRF-rates within each state during the same time period.

For peer review only

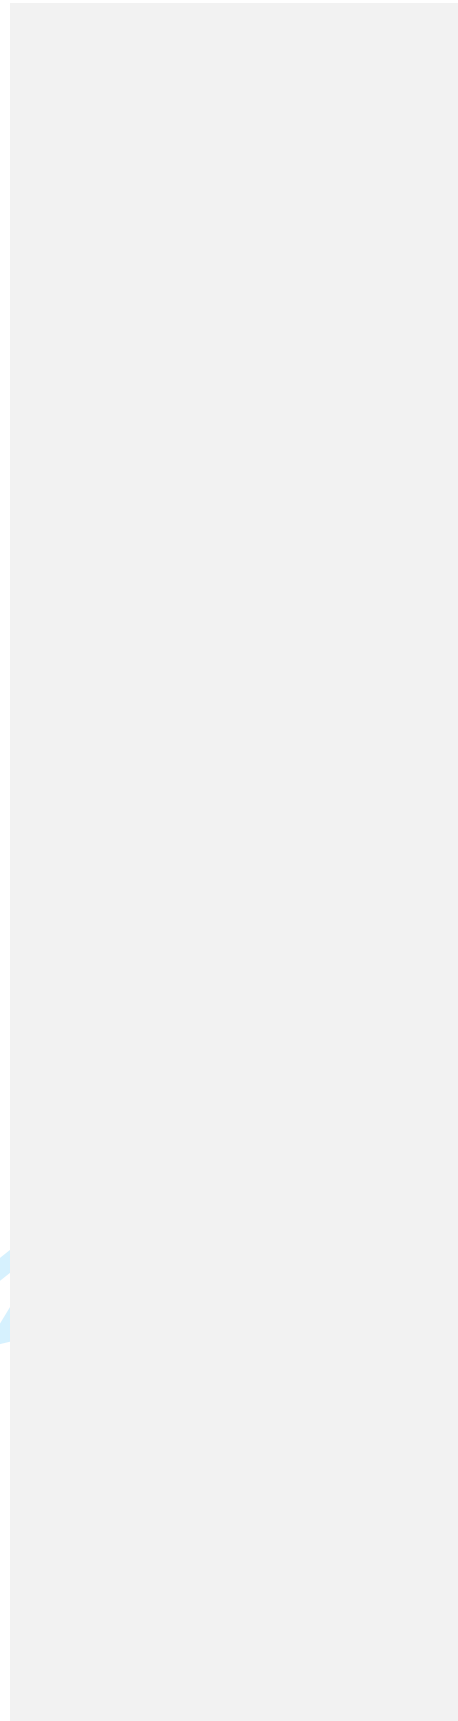

## METHODS

### Data source

We accessed the restricted fatal injury data reports from the Web-based Injury Statistics Query and Reporting System (WISQARS™), an interactive database system provided by Centers for Disease Control and Prevention's (CDC) Injury Prevention and Control Unit (<http://www.cdc.gov/injury/wisqars/>).<sup>1</sup> The data in the WISQARS system is derived from CDC annual mortality data from National Vital Statistics System (NVSS), National Center for Health Statistics (NCHS) (<http://www.cdc.gov/nchs/>) and CDC. The NCHS and the National Association of Public Health Statistics and Information Systems restricts reporting NVSS data for cumulative frequencies <10 for sub-national geographic areas to prevent unintentional disclosure of cases. International Classification of Disease-10th Revision (ICD-10) was used for coding mortality data including intent of injury.<sup>11</sup>

### Study population and variables

Our study population consisted of national and state-specific fatal firearm injuries from 2000-2010 obtained from querying the WISQARS data system. Aggregate information such as number of firearm deaths, total population and age-adjusted rates **according to** race (black, white, other), ethnicity (Hispanic and non-Hispanic) and intent (homicide/legal intervention, suicide, undetermined and unintentional) was obtained.

### Statistical analysis



1  
2  
3  
4  
5  
6  
7  
8  
9 The standard errors (SE) for national and state-specific age-adjusted FRF-  
10 rates per 100,000 persons were derived for the overall 11-year period and annually  
11 and by race, ethnicity and intent. Age-adjusted rates are obtained by direct  
12 standardization using the 2000 population. The overall 11-year rates were assessed  
13 as obtained by total firearm deaths during the 11 years over the total population  
14 during the 11-years. Since only aggregate data could be obtained from WISQARS  
15 without individual patient data, we used random effects meta-analysis and meta-  
16 regression.<sup>12</sup> The rates in each category and the SEs were meta-analyzed using  
17 random-effects meta-analysis. Heterogeneity between states was assessed using  $I^2$   
18 statistic; which ranges from 0 to 100% and denotes the proportion of variation  
19 across states other than by chance.<sup>13 14</sup> In order to assess the temporal trends from  
20 2000-2010, we assumed linear trends across 11 years and used meta-regression to  
21 calculate the change in rates (slope) and the standard deviation (SD). The p-value  
22 from meta-regression was used to assess evidence for trend. Standardized mean  
23 difference (SMD) was calculated by dividing the annual change in age-adjusted rate  
24 by SD.<sup>15 16</sup> We do not present estimates for those states with number of deaths  
25 below 10. Lives-lost or saved are estimated by applying annual change to the total  
26 11-year population (2000-2010). The difference between 11-year national and  
27 state-specific FRF-rates (overall and category-specific) were used to spatially  
28 represent the variation between states. STATA 13.1 (StataCorp LP, College Station,  
29 Texas; 2009) was used to analyze the data.  
30  
31  
32  
33  
34  
35  
36  
37  
38  
39  
40  
41  
42  
43  
44  
45  
46  
47  
48  
49  
50  
51  
52  
53  
54  
55  
56  
57  
58  
59  
60

## RESULTS

Between 2000 and 2010, a total of 335,609 firearm-related deaths were recorded and the overall mortality rate was 10.21 per 100,000. The annual change in FRF-rate across 11-years was -0.017 with a 95% confidence interval (95% CI) of -0.044-0.010, p-trend=0.18, indicating no significant change in national FRF-rates. **Table 1** presents national FRF-rates, for 11-years and annually according to race, ethnicity and intent. Cumulative 11-year FRF-rates were disproportionately high among blacks (18.51) as compared to whites and other race groups, and lowest among other races (3.38). Among whites the FRF-rates were lower than the overall national 11-year rate while increasing from 8.97 to 9.20 from 2000-2010. This annual increase was small (0.006, SMD=0.11) but not significant, p-trend=0.71. Even though the FRF-rates among blacks were consistently higher than national FRF-rates, the annual rates reduced from 18.30 to 16.90; and this decline, -0.114 was not significant, SMD=-0.40, p-trend=0.22. The decline in FRF-rates from 4.76 to 3.25 among other races was significant (change=-0.12, SMD=-1.83, p-trend<0.0001). Annual reduction observed among Hispanics showed a significant reduction, -0.179, p-trend<0.0001 alongside an already low 11-year FRF-rate of 7.13. FRF-rates among non-Hispanics remained slightly above the national rates without increase. FRF-rate by intent was highest for suicides (5.80) while the annual change was minimal in all four categories with a small significant reduction for unintentional deaths (change=-0.010, SMD=-1.70, p-trend<0.0001).

1  
2  
3  
4  
5  
6  
7  
8 State-specific 11-year FRF-rates are represented in **Figure 1** and  
9  
10 **Supplementary Table 1**. Hawaii (HI) (3.02) and Massachusetts (MA) (3.24) had the  
11  
12 lowest 11-year FRF-rates, while Louisiana (LA) had the highest at 18.62. [DC and 7](#)  
13  
14 [states showed a significant declining trend in FRF-rate, while MA and FL](#)  
15  
16 [documented a significant increase](#). District of Columbia (DC) had the largest  
17  
18 significant annual reduction at -1.067 (6.2 lives-saved per year, p-trend = 0.002)  
19  
20 though it had the highest rate of 21.71. Although MA had a low FRF-rate, a  
21  
22 significant increase was observed, change=0.074, p-trend=0.008. Florida (FL) also  
23  
24 showed an increase, change=0.160, 28.2 lives-lost per year, p-trend=0.016. FRF-  
25  
26 rates for Delaware (DL) and Ohio (OH) were 8.89 and 9.10, with a near significant  
27  
28 increasing trend, changes of 0.20 and 0.12. FRF-rate in New York (NY) was 5.15 with  
29  
30 a change=-0.064, 12.3 lives-saved per year, p-trend=0.006. Illinois (IL) had a  
31  
32 significant reduction, change=-0.155, 19.6 lives-saved per year, p-trend=0.025).  
33  
34 FRF-rates in CA was -0.166 (59.3 lives-saved per year, p-trend=0.001), Arizona (AZ)  
35  
36 at -0.230 (13.4 lives-saved per year, p-trend=0.025) and Nevada (NV) at -0.264 (6.4  
37  
38 lives-saved per year, p-trend = 0.008). Maryland (MA) and North Carolina (NC) had  
39  
40 a significant decline: change=-0.169, 9.4 lives-saved per year, p-trend=0.048 and -  
41  
42 0.174, 15.3 lives-saved per year, p-trend=0.001).  
43  
44  
45

46 The 11-year FRF-rates for each state by race are presented in **Figures 2A to**  
47  
48 **2C** and **Supplementary Figures 1A-C**. Among whites, the lowest rate was in MA  
49  
50 with a significant increase from 2000-2010 (change=0.05, p-trend=0.037). FL also  
51  
52 recorded a significant increase (change=0.12, p-trend=0.045) but had high 11-year  
53  
54

1  
2  
3  
4  
5  
6  
7  
8 FRF-rate, 10.02. NV recorded the highest and unchanging FRF-rate at 16.30. The  
9  
10 four states that showed a significant declining trend from 2000-2010 were NY  
11  
12 (change=-0.05, p-trend=0.015), IL (change=-0.12, p-trend=0.028), NC (change=-  
13  
14 0.10, p-trend=0.032), and CA (change=-0.12, p-trend=0.001). Among blacks, HI had  
15  
16 the lowest 11-year FRF-rates at 2.93 while Missouri (MO) had the highest at 30.12  
17  
18 and DC was at 40.95. Oklahoma (OK), OH and DL had high 11-year rates at 20.04,  
19  
20 20.19 and 13.61 respectively with a significant increasing changes of 0.93, 0.51 and  
21  
22 0.79, p-trends of 0.008, 0.027 and 0.028 respectively. A declining trend was  
23  
24 observed among blacks in CA (change=-0.58, p-trend=0.042), AZ (change=-0.83, p-  
25  
26 trend=0.019), NV (change=-1.53, p-trend=0.005), NC (change=-0.38, p-  
27  
28 trend=0.024), Indiana (IN) (change=-0.66, p-trend=0.012), Kansas (KA) (change=-  
29  
30 1.07, p-trend=0.021), Minnesota (MN) (change=-0.61, p-trend=0.038), and DC  
31  
32 (change=-1.58, p-trend=0.017), even though their 11-year FRF-rates were high.  
33  
34 Among other races, Texas (TX) (change=-0.19, p-trend=0.033) and CA (change=-  
35  
36 0.10, p-trend=0.009) showed a significant decline.  
37  
38  
39

40 **Figures 3A-B** and **Supplementary Figures 3A-B** presents the 11-year FRF-  
41  
42 rates for each state by ethnicity. Georgia (GA) (change=-0.54, p-trend=0.012), CA  
43  
44 (change=-0.18, p-trend=0.009), Utah (UT) (change=-0.79, p-trend=0.030), AZ  
45  
46 (change=-0.56, p-trend=0.016), and NV (change=-0.48, p-trend=0.007) were five  
47  
48 high-FRF-rate states (>7.13) while NY (change=-0.17, p-trend=0.001), IL (change=-  
49  
50 0.40, p-trend=0.001), TX (change=-0.21, p-trend=0.004), and Oregon (OR)  
51  
52 (change=-0.33, p-trend=0.037) were the four low-FRF-rate states with a significant  
53  
54  
55  
56  
57  
58  
59  
60

1  
2  
3  
4  
5  
6  
7  
8 declining trend among Hispanics. No states demonstrated an increase among  
9  
10 Hispanics, while non-Hispanics showed a significant increasing trend in MA  
11 (change=0.07, p-trend=0.033), Pennsylvania (PA) (change=0.08, p-trend=0.039), OH  
12 (change=0.13, p-trend=0.048), DL (change=0.25, p-trend=0.036), TX (change=0.14,  
13 p-trend=0.022), FL (change=0.23, p-trend=0.002) and OK (change=0.15, p-  
14 trend=0.045). A declining trend in non-Hispanics was observed in MD (change=-  
15 0.16, p-trend=0.068), NC (change=-0.14, p-trend=0.004) and CA (change=-0.15, p-  
16 trend=0.001). In TX, the FRF-rates among Hispanics (change=-0.21, p-trend=0.004)  
17 demonstrated a significant decline and a significant increase among non-Hispanics  
18 (change=0.14, p-trend=0.022) (**Supplementary Table 2**).

19  
20  
21  
22  
23  
24  
25  
26  
27  
28  
29  
30 FRF-rates from 2000-2010 and by intent is provided in **Figures 4A-D** and  
31 **Supplementary Figures 4A-D**. Most of the northern states had low (<3.73)  
32 homicide-FRF while southern states had high FRF. NY (change=-0.05, p-  
33 trend=0.004), IL (change=-0.10, p-trend=0.027), NC (change=-0.10, p-trend=0.023),  
34 NV (change=-0.15, p-trend=0.031) and DC (change=-1.0, p-trend=0.002) had  
35 significant declining trends while MA (change=0.08, p-trend=0.001), Connecticut  
36 (CT) (change=0.08, p-trend=0.023), OH (change=0.12, p-trend=0.006), DL  
37 (change=0.37, p-trend<0.0001) and FL (change=0.15, p-trend=0.007) had  
38 increasing homicide-FRF. A majority of the states had suicide-FRF-rates >5.80; CA  
39 (change=-0.07, p-trend=0.009) and NC (change=-0.07, p-trend=0.037) had declining  
40 trends. Unintentional-FRF-rates showed a significant decreasing trend in three  
41  
42  
43  
44  
45  
46  
47  
48  
49  
50  
51  
52  
53  
54  
55  
56  
57  
58  
59  
60

1  
2  
3  
4  
5  
6  
7  
8 states, OH (change=-0.01, p-trend=0.022), Kentucky (KY) (change=-0.06, p-  
9 trend=0.009), and Tennessee (TN) (change=-0.05, p-trend=0.002).  
10  
11  
12  
13  
14  
15  
16  
17  
18  
19  
20  
21  
22  
23  
24  
25  
26  
27  
28  
29  
30  
31  
32  
33  
34  
35  
36  
37  
38  
39  
40  
41  
42  
43  
44  
45  
46  
47  
48  
49  
50  
51  
52  
53  
54  
55  
56  
57  
58  
59  
60

## DISCUSSION

National 11-year FRF-rate from 2000-2010 was 10.21, was almost three times higher than Switzerland and Finland.<sup>17</sup> There were four main observations that emerge from this analysis. First, while overall, blacks had higher national rates than whites and Hispanics had lower national rates than non-Hispanics, the 11-year FRF-rates declined among Hispanics and non-white non-black races with no significant change observed among whites, blacks or non-Hispanics. Second, a substantial inter-state heterogeneity was evidenced by 11-year state-specific FRF-rates being as low as 3.02 in HI to as high as 21.71 in DC. FL and MA recorded an upward FRF trend while AZ, CA, IL, MD, NV, NY, NC and DC had declining FRF-rates during the study period. Third, racial and-ethnic variation was shown to drive many of the state-specific variations. Fourth, changes in different FRF-intent also drove many of the state-specific differences.

Firearm deaths increased from 28,663 in 2000 to 31,672 in 2010, about 30,509 deaths per year and no change in rate. These findings are similar to a report by the Bureau of Justice of a rapid decline in firearm homicides from 1993 to 1999 followed by a leveling of rates from 2000-2011.<sup>18</sup> It is important to bear in mind that these endemic conditions are associated with substantial, long-term cumulative health burden associated with firearm death throughout the US. Taken at face value, this endemic FRF-rate may seem reassuring, evidencing no increase in burden over time, concealing a substantial existing public health burden due to long-term cumulative burden to the country, as a whole surpasses the toll suffered during the

1  
2  
3  
4  
5  
6  
7  
8 1980s epidemic stage.<sup>19</sup> During 2000-2011 there were 306,946 firearm related  
9  
10 deaths. With the endemic annual FRF-rate of 10.3, US-population at 338 million by  
11  
12 2020<sup>20</sup> and 10% decadal population increase, we estimate 336,778 firearm related  
13  
14 deaths to occur between 2011 and 2020.

15  
16  
17  
18 The 11-year FRF-rates we report among blacks was twice greater than that  
19  
20 of whites and six-times greater than that of other races is in line with reports  
21  
22 showing disproportionately larger firearm fatality and injury rates than whites and  
23  
24 other race.<sup>3 21 22</sup> Although there was a plateau of the national FRF-rates, rates among  
25  
26 Hispanics and non-white non-black races declined and may be explained by the lack  
27  
28 of access to firearms or low firearm ownership among Hispanics and other races.<sup>23</sup>  
29  
30 Our results explain the report where Hispanics were least likely to use firearms for  
31  
32 suicides albeit being more likely to self-injury than any other race groups.<sup>24</sup> Data  
33  
34 from 1981-2010 found that among youths a decline in homicide rates for blacks  
35  
36 between was significantly slower than the declines for Hispanics and other racial  
37  
38 and ethnic groups<sup>25</sup>, suggestive of lower crime.

39  
40  
41 We found 41 states with no FRF-rate change, while 7 states and DC  
42  
43 demonstrated either a significant decline or increase. MA and FL recorded a  
44  
45 significant increase, MA with smallest and FL with largest annual increase while MA  
46  
47 had the lowest 11-year FRF-rate. The Brady Center to Prevent Gun Violence <sup>9</sup>  
48  
49 firearm legislative strength score for 2013, has MA to be third with score of 65  
50  
51 among all states in restrictive firearm legislation, while FL has a score of 3. After MA  
52  
53  
54



1  
2  
3  
4  
5  
6  
7  
8  
9  
10  
11  
12  
13  
14  
15  
16  
17  
18  
19  
20  
21  
22  
23  
24  
25  
26  
27  
28  
29  
30  
31  
32  
33  
34  
35  
36  
37  
38  
39  
40  
41  
42  
43  
44  
45  
46  
47  
48  
49  
50  
51  
52  
53  
54  
55  
56  
57  
58  
59  
60

passed the toughest firearm-control legislation in 1998, firearm ownership rates plummeted but violent crimes (476.1 to 468.9) and homicides (2.2 to 3.3) rose.<sup>26</sup>

The significant FRF-rate increase in MA may be ~~explained due to by~~ the influx of firearms from the two neighboring states (Maine and New Hampshire) with weak firearm control legislation.<sup>27</sup> FL is a “shall issue”, weak legislature state with just 2 laws to prevent illegal gun-trafficking.<sup>27</sup> In contrast to the increasing FRF-rates, the aggregate violent crimes in FL declined from 801.1 to 542.9,<sup>28</sup> emphasizing a particularly concerning public health problem of increasing gun violence even in a climate of reducing violence.

CA, NY, IL, AZ, NV, MD, NC, and DC had declining trends but the most marked reduction was observed in CA and may be directly linked to strength of firearm legislature, a score of 81.<sup>9</sup> CA has eight state laws to prevent illegal gun trafficking<sup>27</sup> and a reduction in homicide crime rate in CA by 25.4% from 2001-2010.<sup>29</sup> An emergency department study from 2004-2008 reporting reduction of firearm death rate in CA echoing the results of our study.<sup>30</sup> NY and IL had similar trend profiles and an overall decline in FRF-rates, but the Brady scores were 62 and 35<sup>9</sup> with 10 and 8 policies preventing illegal firearm trafficking respectively.<sup>27</sup> FRF-rate reduction in AZ and NV is in contrast to CA and NY, having no laws preventing illegal gun trafficking,<sup>27</sup> with Brady scores 0 and 5 respectively.<sup>9</sup> In AZ violent crime rate dropped from 544.5 offenses in 2002 to 372.2 in 2010,<sup>31 32</sup> and NV had reductions in index crimes.<sup>33</sup> This reduction and our results may be attributed to policing strategies.<sup>34</sup> Our reported reduction in firearm death rates in DC may be attributed

1  
2  
3  
4  
5  
6  
7  
8 to 9 laws preventing illegal gun trafficking.<sup>27</sup> Firearm policies are not stringent in  
9  
10 NC, strength of firearm legislature being 16<sup>9</sup> with only 5 illegal gun trafficking  
11  
12 laws.<sup>27</sup> However, the violent crime rate in NC dropped from 493 to 363 from 2000-  
13  
14 2010,<sup>35</sup> suggesting that the factors that led to reduction in crime rates may have also  
15  
16 driven FRF-rate reduction.  
17  
18  
19

20 We found that the state-specific increasing trend in FL was driven by an  
21  
22 increase among whites, blacks and non-Hispanics and can be explained by violent  
23  
24 crime rates in FL which ranks 4<sup>th</sup> in violent crime.<sup>36</sup> The racial gap in arrests for  
25  
26 major crimes widened in FL from 2000-2010: 6,175 blacks and 6,071 whites were  
27  
28 arrested in 2000 to 2,398 and 3,192 in 2010.<sup>37</sup> The increase in FRF-rates in MA  
29  
30 driven by whites and non-Hispanics is in contrast to the racial differences observed  
31  
32 in violent deaths with non-Hispanic blacks having the highest rate of 21.6 as  
33  
34 compared to 4.9 among whites.<sup>38</sup> MA has relatively low violent crime rate (ranks  
35  
36 20<sup>th</sup> in US),<sup>36</sup> and stringent firearm control.<sup>9</sup> Even though nationally no significant  
37  
38 reduction in FRF-rates among blacks was observed in our study, FRF-rates among  
39  
40 blacks drove the state-specific declines in AZ, NV, CA, NC and DC. Declining trends  
41  
42 among Hispanics in AZ, NV, CA, NY and IL contributing to state-specific declines may  
43  
44 be due to a combination of low firearm ownership<sup>23</sup> and racially targeted crime-  
45  
46 control activities.<sup>39</sup> In IN, KS, MN and OK, with no statewide reduction, the FRF-rates  
47  
48 fell solely among blacks, with no change among whites. These states have very few  
49  
50 laws to prevent firearm violence and trafficking<sup>27</sup> and rank among the highest  
51  
52 twenty states in crime rates except MN.<sup>36</sup>  
53  
54  
55  
56  
57  
58  
59  
60

1  
2  
3  
4  
5  
6  
7  
8  
9  
10  
11 The increasing trend in FL and MA in our study was due to increase in  
12 firearm homicides. According to data from CDC, rates of suicides in FL remained  
13 constant from 2000-2010 while in MA these rates doubled from 1.92 to 3.15.<sup>1</sup> In  
14 2010, 71% of homicides in FL were by firearms,<sup>28</sup> and in MA, 22% of the homicides  
15 were by firearm.<sup>38</sup> In CA, where all racial and-ethnic groups revealing declining  
16 trends, was driven by reduction in suicide-FRF and is associated with the states'  
17 increased effort in implementing "The Mental Health Services Act" to reduce suicide  
18 rates.<sup>40</sup> In our study, reduction in homicides was caused by declines in AZ, IL, NV,  
19 NY, NC and DC. These declining patterns are similar to the reduction in all-cause  
20 homicide rates from 2000-2010 that occurred in a smaller magnitude among AZ, IL,  
21 NV, NY, NC and in a much larger magnitude in DC.<sup>1</sup>  
22  
23  
24  
25  
26  
27  
28  
29  
30  
31  
32  
33

34 There are several limitations in our study. Under reporting of firearm fatal  
35 events is a known phenomenon and a limitation of this study, which cannot be  
36 verified. There is, however, no reason to suspect that blacks and Hispanics are more  
37 likely than whites and non-Hispanic individuals to have a fatal firearm injury  
38 misclassified on the death certificate, so this under-reporting should not have biased  
39 our findings. Another limitation is that, despite the considerable state-specific  
40 heterogeneity, the actual variation in firearm mortality may be a feature of cities  
41 and counties with varying crime rates, and we do not address the variation existing  
42 at such level. Finally, comparisons made between other races may not be usefully  
43 interpreted due to the heterogeneity and the small frequency of events in this sub-  
44  
45  
46  
47  
48  
49  
50  
51  
52  
53  
54

1  
2  
3  
4  
5  
6  
7  
8 population. However, as other race makes up about 10% of the US population, the  
9 results are discussed in relation to blacks and Hispanics.  
10  
11  
12

13  
14 In summary, we showed no change in national firearm mortality rates during  
15 2000-2010, but showed distinct state-specific patterns with racial and/ethnic  
16 variation and by intent. ~~The patterns observed do not map neatly onto known~~  
17 ~~firearm control efforts by individual states. While some of the states with most~~  
18 ~~stringent gun laws showed an expected decrease in firearm death rates, some states~~  
19 ~~with strong gun control laws reported an increase in death rates. This may have a~~  
20 ~~direct implication for a public health approach to gun violence prevention that more~~  
21 ~~broadly needs to grapple with firearm available and porous cross-state borders that~~  
22 ~~permit firearm carriage across states.~~ The distinctive state-specific firearm fatality  
23 profiles vary by race, ethnicity and intent adding another layer of complexity to the  
24 FRF trends. This calls for specific studies to identify the drivers of the state-specific  
25 temporal trends followed by introducing tailored programs that target specific  
26 racial and-ethnic groups in specific states.  
27  
28  
29  
30  
31  
32  
33  
34  
35  
36  
37  
38  
39  
40  
41  
42  
43  
44  
45  
46  
47  
48  
49  
50  
51  
52  
53  
54

Table 1: Trends in firearm deaths in the United States, WISQARS 2000-2010.

|                             | Age-adjusted firearm deaths per 100,000 population |       |       |       |       |       |       |       |       |       |       |       | Change  |                |       |         |
|-----------------------------|----------------------------------------------------|-------|-------|-------|-------|-------|-------|-------|-------|-------|-------|-------|---------|----------------|-------|---------|
|                             | 2000                                               | 2001  | 2002  | 2003  | 2004  | 2005  | 2006  | 2007  | 2008  | 2009  | 2010  | Total | Annual  | 95% CI         | SMD   | P-trend |
| All                         | 10.14                                              | 10.31 | 10.43 | 10.29 | 9.99  | 10.27 | 10.22 | 10.24 | 10.23 | 10.05 | 10.07 | 10.21 | -0.017  | -0.044, 0.010  | -0.44 | 0.181   |
| <b>Race</b>                 |                                                    |       |       |       |       |       |       |       |       |       |       |       |         |                |       |         |
| White                       | 8.97                                               | 9.21  | 9.19  | 9.05  | 8.84  | 8.98  | 8.80  | 8.98  | 9.18  | 9.13  | 9.20  | 9.05  | 0.006   | -0.027, 0.039  | 0.11  | 0.705   |
| Black                       | 18.30                                              | 18.32 | 19.22 | 19.01 | 18.31 | 19.34 | 19.98 | 19.31 | 18.19 | 17.15 | 16.90 | 18.51 | -0.114  | -0.311, 0.082  | -0.40 | 0.220   |
| Other                       | 4.76                                               | 3.89  | 4.19  | 4.03  | 3.70  | 3.88  | 3.83  | 3.38  | 3.25  | 3.37  | 3.25  | 3.38  | -0.121  | -0.166, -0.076 | -1.83 | <0.0001 |
| <b>Ethnicity</b>            |                                                    |       |       |       |       |       |       |       |       |       |       |       |         |                |       |         |
| Hispanic                    | 7.81                                               | 7.73  | 7.63  | 7.68  | 7.42  | 7.51  | 7.19  | 7.21  | 6.60  | 6.38  | 5.86  | 7.13  | -0.179  | -0.236, -0.122 | -2.13 | <0.0001 |
| Non-Hispanic                | 10.31                                              | 10.50 | 10.67 | 10.50 | 10.23 | 10.53 | 10.54 | 10.61 | 10.74 | 10.55 | 10.71 | 10.54 | 0.027   | -0.002, 0.056  | 0.63  | 0.068   |
| <b>Intent</b>               |                                                    |       |       |       |       |       |       |       |       |       |       |       |         |                |       |         |
| Homicide/Legal Intervention | 3.88                                               | 4.05  | 4.17  | 4.19  | 4.05  | 4.28  | 4.40  | 4.32  | 4.14  | 3.89  | 3.73  | 4.10  | -0.008  | -0.054, 0.038  | -0.12 | 0.705   |
| Suicide                     | 5.90                                               | 5.90  | 5.92  | 5.77  | 5.65  | 5.66  | 5.54  | 5.63  | 5.82  | 5.91  | 6.06  | 5.80  | 0.001   | -0.035, 0.038  | 0.03  | 0.932   |
| Undetermined                | 0.08                                               | 0.08  | 0.08  | 0.08  | 0.08  | 0.07  | 0.07  | 0.09  | 0.09  | 0.07  | 0.08  | 0.08  | -0.0001 | -0.002, 0.002  | -0.02 | 0.944   |
| Unintentional               | 0.27                                               | 0.28  | 0.26  | 0.25  | 0.22  | 0.27  | 0.21  | 0.20  | 0.19  | 0.18  | 0.20  | 0.23  | -0.010  | -0.014, -0.006 | -1.70 | <0.0001 |

All values are age-adjusted rates per 100,000 persons. Change denotes annual change in rate per 100,000. Negative value indicates decline in firearm death rates per 100,000 from 2000-2010 and positive value indicates increase in firearm death rate per 100,000 from 2000-2010. CI denotes confidence intervals of the annual change in firearm death rate per 100,000. SMD indicates standardized mean difference; is equal to annual change/standard deviation. P-trend calculated using meta-regression indicates the significance of the decline or the increase in firearm related death rates from 2000-2010. Data are from Center for Disease Control and Prevention (CDC)'s National center for Injury Prevention and Control Web-based Injury Statistics Query and Reporting System (WISQARS).

**Figure legends**

Formatted: Font: +Body (Cambria)

**Figure 1: Firearm related fatality rates from 2000-2010.**

Firearm related fatality rates are 11-year cumulative age-adjusted rates per 100,000 persons from 2000 to 2010 for each of the 50 states and District of Columbia ranging from 3.02 (HI) to 21.71 (DC) per 100,000. The colors represent increasing rates from blue to red. Significant decline in 7 states (AZ, CA, IL, MD, NV, NY and NC and DC) are represented as gold stars and significant increase in FL and MA as black stars within the map and in the table.

The table summarizes the rates per 100,000, annual change in rate and p-trend for those states that show significant increase or decrease. "FRF" denotes firearm related fatality. "Change" indicates the annual change in rates from 2000 to 2010. "P-trend" indicates the significance of the decline or the increase in firearm related fatality rates from 2000 to 2010 and was calculated using meta-regression. Negative values for change indicate a decrease while positive values indicate increase in rates across the years. The intent-specific rates of firearm related fatality is denoted with arrows in the table below: downward arrow denotes reduction in rates, upward arrows indicate an increase and two-way arrows indicate no change. "ne" represents data which cannot be estimated due to frequency <10. HI (11-year=3.02, change=-0.057, p-trend=0.36) and AK (11-year=18.09, change=0.10, p-trend=0.64) are not represented in the map.

**Figure 2: Firearm related fatality rates from 2000-2010 according to race.****Whites:**

Firearm related fatality rates are 11-year cumulative age-adjusted rates per 100,000 persons from 2000 to 2010 for each of the 50 states and District of Columbia; ranging from 2.57 (MA) to 16.30 (NV) per 100,000. The colors represent increasing rates from blue to red. White represents no data or states where the frequency was <10 among whites. Significant decline in 4 states (CA, NY, IL and NC) are represented as gold stars and significant increase in MA and FL as black stars. HI (11-year=4.29, change=0.03, p-trend=0.84) and AK (11-year=15.77, change=0.15, p-trend=0.56) are not represented in the map.

**Blacks:**

Firearm related fatality rates are 11-year cumulative age-adjusted rates per 100,000 persons from 2000 to 2010 for each of the 50 states and District of Columbia; ranging from 2.93 (HI) to 40.95 (DC) per 100,000. The colors represent increasing rates from blue to red. White represents no data or states where the frequency was <10 among blacks. Significant decline in 8 states (CA, NV, AZ, KA, MN, IN, NC and DC) are represented as gold stars and significant increase in OK, OH and DL as black stars. HI (11-year=2.93) and AK (11-year=12.36) are not represented in the map.

**Other race:**

1  
2  
3  
4  
5  
6  
7  
8  
9 Firearm related fatality rates are 11-year cumulative age-adjusted rates per 100,000  
10 persons from 2000 to 2010 for each of the 50 states and District of Columbia;  
11 ranging from 0.82 (NY) to 22.54 (AK) per 100,000. The colors represent increasing  
12 rates from blue to red. White represents no data or states where the frequency was  
13 <10 among other race. Significant decline in 2 states (CA and TX) are represented as  
14 gold stars and there were no states with significant increase. HI (11-year=2.18,  
15 change=-0.04, p-trend=0.50) and AK (11-year=22.54, change=-0.15, p-trend=0.75)  
16 are not represented in the map.

17  
18 **Figure 3: Firearm related fatality rates from 2000-2010 according to ethnicity.**

19 Hispanic:

20 Firearm related fatality rates are 11-year cumulative age-adjusted rates per 100,000  
21 persons from 2000 to 2010 for each of the 50 states and District of Columbia;  
22 ranging from 3.13 (NJ) to 15.63 (ND) per 100,000. The colors represent increasing  
23 rates from blue to red. White represents no data or states where the frequency was  
24 <10 among Hispanics. Significant decline in 9 states (CA, AZ, NV, OR, UT, TX, IL, GA  
25 and NY) are represented as gold stars and there were no states with significant  
26 increase. HI (11-year=3.84) and AK (11-year=8.95) are not represented in the map.

27  
28 Non-Hispanic:

29 Firearm related fatality rates are 11-year cumulative age-adjusted rates per 100,000  
30 persons from 2000 to 2010 for each of the 50 states and District of Columbia;  
31 ranging from 2.95 (HI) to 23.45 (DC) per 100,000. The colors represent increasing  
32 rates from blue to red. White represents no data or states where the frequency was  
33 <10 among non-Hispanics. Significant decline in 3 states (CA, NC and DC) are  
34 represented as gold stars and significant increase in 7 states (TX, OK, FL, OH, PA, DL,  
35 and MA) as black stars. HI (11-year=2.95, change=-0.05, p-trend=0.50) and AK (11-  
36 year=18.44, change=0.13, p-trend=0.57) are not represented in the map.

37  
38 **Figure 4: Firearm related fatality rates from 2000-2010 according to intent.**

39 Homicide:

40 Firearm related fatality rates are 11-year cumulative age-adjusted rates per 100,000  
41 persons from 2000 to 2010 for each of the 50 states and District of Columbia;  
42 ranging from 0.65 (NH) to 19.75 (DC) per 100,000. The colors represent increasing  
43 rates from blue to red. White represents no data or states where the frequency was  
44 <10. Significant decline in 5 states (NV, IL, NC, NY and DC) are represented as gold  
45 stars and significant increase in MO, FL, OH, MA, CT, and DL as black stars. HI (11-  
46 year=0.79, change=-0.01, p-trend=0.68) and AK (11-year=3.54, change=0.001, p-  
47 trend=0.95) are not represented in the map.

48  
49 Suicide:

50 Firearm related fatality rates are 11-year cumulative age-adjusted rates per 100,000  
51 persons from 2000 to 2010 for each of the 50 states and District of Columbia;  
52 ranging from 1.61 (MA) to 13.79 (AK) per 100,000. The colors represent increasing  
53

1  
2  
3  
4  
5  
6  
7  
8 rates from blue to red. White represents no data or states where the frequency was  
9 <10. Significant decline in 2 states (CA and NC) are represented as gold stars and  
10 there were no states with significant increase. HI (11-year=2.10, change=-0.001, p-  
11 trend=0.95) and AK (11-year=13.79, change=0.11, p-trend=0.61) are not  
12 represented in the map.

13  
14 Undetermined:

15 Firearm related fatality rates are 11-year cumulative age-adjusted rates per 100,000  
16 persons from 2000 to 2010 for each of the 50 states and District of Columbia;  
17 ranging from 0.01 (NJ) to 0.47 (AK) per 100,000. The colors represent increasing  
18 rates from blue to red. White represents no data or states where the frequency was  
19 <10. There was no significant decline or increasing state-specific trends. HI (11-  
20 year=ne) and AK (11-year=0.47) are not represented in the map.

21  
22 Unintentional:

23 Firearm related fatality rates are 11-year cumulative age-adjusted rates per 100,000  
24 persons from 2000 to 2010 for each of the 50 states and District of Columbia;  
25 ranging from 0.04 (MA) to 0.83 (LO) per 100,000. The colors represent increasing  
26 rates from blue to red. White represents no data or states where the frequency was  
27 <10. Significant decline in 3 states (OH, KN and TN) are represented as gold stars  
28 and there were no states with significant increase. HI (11-year=0.08) and AK (11-  
29 year=0.29) are not represented in the map.  
30  
31  
32  
33  
34  
35  
36  
37  
38  
39  
40  
41  
42  
43  
44  
45  
46  
47  
48  
49  
50  
51  
52  
53  
54  
55  
56  
57  
58  
59  
60



**Contributorship:**

Galea and Kalesan conceived and supervised the study. Kalesan and Vasan completed the analyses. Kalesan, Galea and Villarreal led the writing. Fagan, Teperman, Mobily and Hlavacek assisted with the study and analyses. Hlavacek assisted with obtaining state gun laws.

**Competing interests:**

None of the authors have competing interests to report

**Funding:**

There was no funding for this project

**Data sharing:**

All data used for the analysis are publicly available and there is no further data for data sharing purposes.

## REFERENCES

1. Centers for Disease Control and Prevention NCFIPaC. Web-based Injury Statistics Query and Reporting System (WISQARS). Atlanta, GA: National Center for Injury Prevention and Control, 2005.
2. Murphy SL, Jiaquan X, K.D. K. Deaths: Final Data for 2010. *National Vital Statistics Reports*, 2013;1-168.
3. Ikeda RM, Gorwitz R, James SP, Powell KE, Mercy JA. Trends in fatal firearm-related injuries, United States, 1962-1993. *American journal of preventive medicine* 1997;13(5):396-400.
4. Gotsch KE, Annet JL, Mercy JA, Ryan GW. Surveillance for Fatal and Nonfatal Firearm-Related Injuries --- United States, 1993--1998. *MMWR Surveill Summ* 2001;50:1-32.
5. Harris AR, Fisher GA, Thomas SH. Homicide as a medical outcome: racial disparity in deaths from assault in US Level I and II trauma centers. *The journal of trauma and acute care surgery* 2012;72(3):773-82.
6. Kellermann AL, Rivara FP, Rushforth NB, Banton JG, Reay DT, Francisco JT, et al. Gun Ownership as a Risk Factor for Homicide in the Home. *New England Journal of Medicine* 1993;329(15):1084-91.
7. Firearm injury in the U.S. PA: Firearm & Injury Center at Penn, 2011.
8. Fleegler EW, Lee LK, Monuteaux MC, Hemenway D, Mannix R. Firearm Legislation and Firearm-Related Fatalities in the United States. *Jama Intern Med* 2013;173(9):732-40.
9. 2013 State Scorecard. In: Violence BCtPGVaLcTPG, editor. *Score Card*. Washington, DC, 2013.
10. Phillips JA. Factors associated with temporal and spatial patterns in suicide rates across U.S. states, 1976-2000. *Demography* 2013;50(2):591-614.
11. Hoyert DL, Arias E, Smith B, Murphy SL, Kochanek KD. Deaths: Final Data for 1999. *National vital statistics reports*. Hyattsville, Maryland: National Center for Health Statistics, 2001.
12. Egger M, Smith GD, Altman D. *Systematic Reviews in Health Care: Meta-analysis in Context*. London: BMJ Books, 2001.
13. Higgins JP, Thompson SG. Quantifying heterogeneity in a meta-analysis. *Statistics in medicine* 2002;21(11):1539-58.
14. Higgins JP, Thompson SG, Deeks JJ, Altman DG. Measuring inconsistency in meta-analyses. *BMJ* 2003;327(7414):557-60.
15. Cohen J. A power primer. *Psychological bulletin* 1992;112(1):155-9.
16. Rosenthal R, Rubin DB. A simple, general purpose display of magnitude of experimental effect. *J Educ Psychol* 1982;74(2):166-69.
17. Bangalore S, Messerli FH. Gun Ownership and Firearm-related Deaths. *The American journal of medicine* 2013;126(10):873-6.
18. Planty M, Truman JL. Firearm Violence, 1993-2011. U.S. Department of Justice: Bureau of Justice Statistics, 2013.

19. Christoffel KK. Firearm injuries: epidemic then, endemic now. *American journal of public health* 2007;97(4):626-9.
20. Nygaard DF. World population projections, 2020. *A 2020 vision for food, agriculture and the environment*. Washington DC: International Food Policy Research Institute, 1994.
21. Cherry D, Annest JL, Mercy JA, Kresnow M, Pollock DA. Trends in nonfatal and fatal firearm-related injury rates in the United States, 1985-1995. *Annals of emergency medicine* 1998;32(1):51-9.
22. Kalesan B, French C, Fagan JA, Fowler DL, Galea S. Firearm-related Hospitalizations and In-Hospital Mortality in the United States, 2000-2010. *American journal of epidemiology* 2013.
23. Schwebel DC, Lewis T, Simon TR, Elliott MN, Toomey SL, Tortolero SR, et al. Prevalence and Correlates of Firearm Ownership in the Homes of Fifth Graders: Birmingham, AL, Houston, TX, and Los Angeles, CA. *Health education & behavior : the official publication of the Society for Public Health Education* 2014.
24. Suicides and Self-Injury by Firearm. In: Bureau of Health Statistics and Research DoH, editor. Pennsylvania: Pennsylvania Department of Health, 2006.
25. David-Ferdon C, Dahlberg LL, Kegler SR. Homicide rates among persons aged 10-24 years - United States, 1981-2010. *MMWR. Morbidity and mortality weekly report* 2013;62(27):545-8.
26. (NIBRS) NI-BRS. National Incident-Based Reporting System (NIBRS). Commonwealth of Massachusetts, 2013.
27. Guns TT. Top Sources of Crime Guns in America, 2010.
28. Crime in Florida, Florida uniform crime report. In: (1992-2012). FSACF, editor. Tallahassee, FL: Florida Statistical Analysis Center: FDLE, 2013.
29. Harris KD. Homicide in California 2010. California: California Department of Justice, 2010.
30. Coyne-Beasley T, Lees AC. Fatal and nonfatal firearm injuries in North Carolina. *North Carolina medical journal* 2010;71(6):565-8.
31. Halliday RC. Crime in Arizona 2002. *An annual report compiled by Access Integrity Unit of the Arizona Department of Public Safety*. Phoenix, AZ: Arizona Department of Public Safety, 2002.
32. Halliday RC. Crime in Arizona 2010. *An annual report compiled by Access Integrity Unit of the Arizona Department of Public Safety*. Phoenix, AZ: Arizona Department of Public Safety, 2010.
33. Crime in Nevada 2010. In: Safety NDoP, editor. *Crime in Nevada*: State of Nevada, Department of Public Safety, 2012.
34. Assistance BoJ. Reducing Crime Through Intelligence-Led Policing. Washington, D.C: Office of Justice Programs, US Department of Justice, 2012:24-26.
35. Medlin L, Davis J. Scorecard on Crime and Justice in North Carolina: Criminal Justice Analysis Center, 2012.
36. Crime in the United States, 2006. Retrieved (April 14, 2014), from <http://www.fbi.gov/about-us/cjis/ucr/crime-in-the-u.s/2006>. In: United States Department of Justice FBI, editor, 2007.

- 1
  - 2
  - 3
  - 4
  - 5
  - 6
  - 7
  - 8
  - 9
  - 10
  - 11
  - 12
  - 13
  - 14
  - 15
  - 16
  - 17
  - 18
  - 19
  - 20
  - 21
  - 22
  - 23
  - 24
  - 25
  - 26
  - 27
  - 28
  - 29
  - 30
  - 31
  - 32
  - 33
  - 34
  - 35
  - 36
  - 37
  - 38
  - 39
  - 40
  - 41
  - 42
  - 43
  - 44
  - 45
  - 46
  - 47
  - 48
  - 49
  - 50
  - 51
  - 52
  - 53
  - 54
  - 55
  - 56
  - 57
  - 58
  - 59
  - 60
37. Part I and II Arrests for Florida by Age, Sex, and Race. *Annual Crime in Florida*. FL: Florida Department of Law Enforcement, 2012.
38. Violent Deaths in Massachusetts: Surveillance Update 2010: Massachusetts Department of Public Health, 2013.
39. J.M S. Maintaining racial inequality through crime control: mass incarceration and residential segregation. *Contemp Justice Review* 2012;15(4):469-84.
40. Clark W, Welch SN, Berry SH, Collentine AM, Collins R, Lebron D, et al. California's historic effort to reduce the stigma of mental illness: the Mental Health Services Act. *American journal of public health* 2013;103(5):786-94.

1  
2  
3  
4  
5  
6  
7  
8  
9  
10  
11  
12  
13  
14  
15  
16  
17  
18  
19  
20  
21  
22  
23  
24  
25  
26  
27  
28  
29  
30  
31  
32  
33  
34  
35  
36  
37  
38  
39  
40  
41  
42  
43  
44  
45  
46  
47  
48  
49  
50  
51  
52  
53  
54  
55  
56  
57  
58  
59  
60

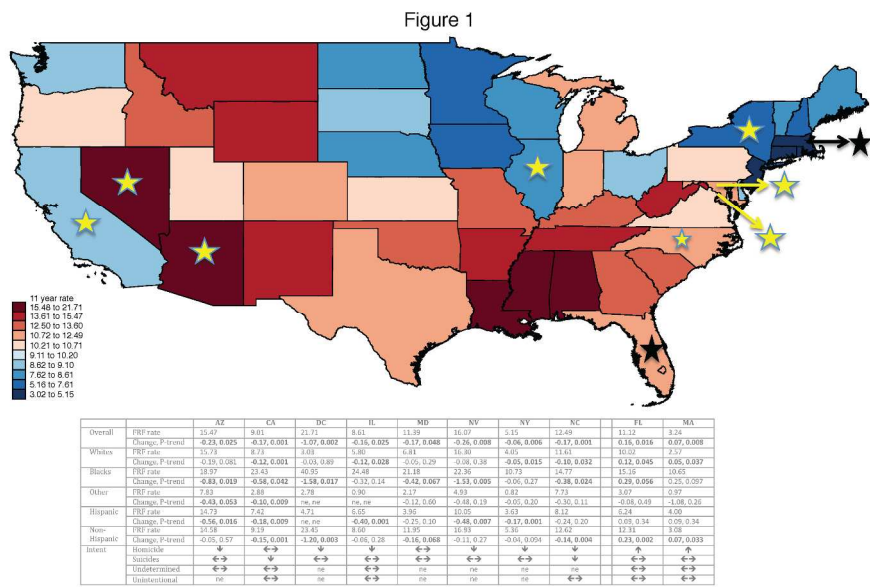

Figure 1: Firearm related fatality rates from 2000-2010.

Firearm related fatality rates are 11-year cumulative age-adjusted rates per 100,000 persons from 2000 to 2010 for each of the 50 states and District of Columbia ranging from 3.02 (HI) to 21.71 (DC) per 100,000. The colors represent increasing rates from blue to red. Significant decline in 7 states (AZ, CA, IL, MD, NV, NY and NC and DC) are represented as gold stars and significant increase in FL and MA as black stars within the map and in the table.

The table summarizes the rates per 100,000, annual change in rate and p-trend for those states that show significant increase or decrease. "FRF" denotes firearm related fatality. "Change" indicates the annual change in rates from 2000 to 2010. "P-trend" indicates the significance of the decline or the increase in firearm related fatality rates from 2000 to 2010 and was calculated using meta-regression. Negative values for change indicate a decrease while positive values indicate increase in rates across the years. The intent-specific rates of firearm related fatality is denoted with arrows in the table below: downward arrow denotes reduction in rates, upward arrows indicate an increase and two-way arrows indicate no change. "ne" represents data which cannot be estimated due to frequency <10. HI (11-year=3.02, change=-0.057, p-trend=0.36) and AK (11-year=18.09, change=0.10, p-trend=0.64) are not represented in the map.

254x190mm (300 x 300 DPI)

Figure 2

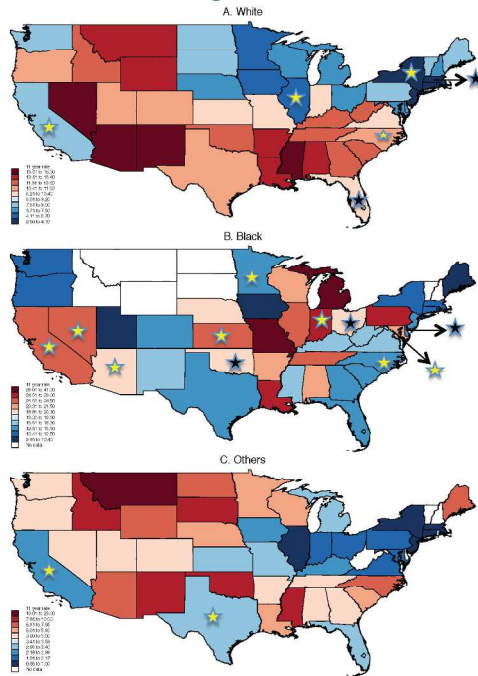

Figure 2: Firearm related fatality rates from 2000-2010 according to race.

**Whites:**

Firearm related fatality rates are 11-year cumulative age-adjusted rates per 100,000 persons from 2000 to 2010 for each of the 50 states and District of Columbia; ranging from 2.57 (MA) to 16.30 (NV) per 100,000.

The colors represent increasing rates from blue to red. White represents no data or states where the frequency was <10 among whites. Significant decline in 4 states (CA, NY, IL and NC) are represented as gold stars and significant increase in MA and FL as black stars. HI (11-year=4.29, change=0.03, p-trend=0.84) and AK (11-year=15.77, change=0.15, p-trend=0.56) are not represented in the map.

**Blacks:**

Firearm related fatality rates are 11-year cumulative age-adjusted rates per 100,000 persons from 2000 to 2010 for each of the 50 states and District of Columbia; ranging from 2.93 (HI) to 40.95 (DC) per 100,000.

The colors represent increasing rates from blue to red. White represents no data or states where the frequency was <10 among blacks. Significant decline in 8 states (CA, NV, AZ, KA, MN, IN, NC and DC) are represented as gold stars and significant increase in OK, OH and DL as black stars. HI (11-year=2.93) and AK (11-year=12.36) are not represented in the map.

**Other race:**

Firearm related fatality rates are 11-year cumulative age-adjusted rates per 100,000 persons from 2000 to 2010 for each of the 50 states and District of Columbia; ranging from 0.82 (NY) to 22.54 (AK) per 100,000.

The colors represent increasing rates from blue to red. White represents no data or states where the frequency was <10 among other race. Significant decline in 2 states (CA and TX) are represented as gold stars and there were no states with significant increase. HI (11-year=2.18, change=-0.04, p-trend=0.50) and AK (11-year=22.54, change=-0.15, p-trend=0.75) are not represented in the map.

254x190mm (300 x 300 DPI)

Figure 3

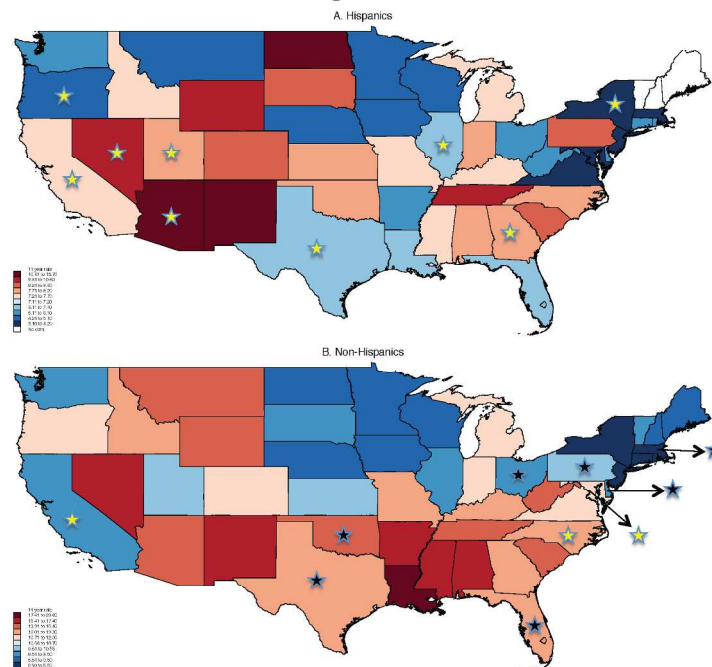

Figure 3: Firearm related fatality rates from 2000-2010 according to ethnicity.

#### Hispanic:

Firearm related fatality rates are 11-year cumulative age-adjusted rates per 100,000 persons from 2000 to 2010 for each of the 50 states and District of Columbia; ranging from 3.13 (NJ) to 15.63 (ND) per 100,000.

The colors represent increasing rates from blue to red. White represents no data or states where the frequency was <10 among Hispanics. Significant decline in 9 states (CA, AZ, NV, OR, UT, TX, IL, GA and NY) are represented as gold stars and there were no states with significant increase. HI (11-year=3.84) and AK (11-year=8.95) are not represented in the map.

#### Non-Hispanic:

Firearm related fatality rates are 11-year cumulative age-adjusted rates per 100,000 persons from 2000 to 2010 for each of the 50 states and District of Columbia; ranging from 2.95 (HI) to 23.45 (DC) per 100,000.

The colors represent increasing rates from blue to red. White represents no data or states where the frequency was <10 among non-Hispanics. Significant decline in 3 states (CA, NC and DC) are represented as gold stars and significant increase in 7 states (TX, OK, FL, OH, PA, DL, and MA) as black stars. HI (11-year=2.95, change=-0.05, p-trend=0.50) and AK (11-year=18.44, change=0.13, p-trend=0.57) are not represented in the map.

254x190mm (300 x 300 DPI)



Figure 4

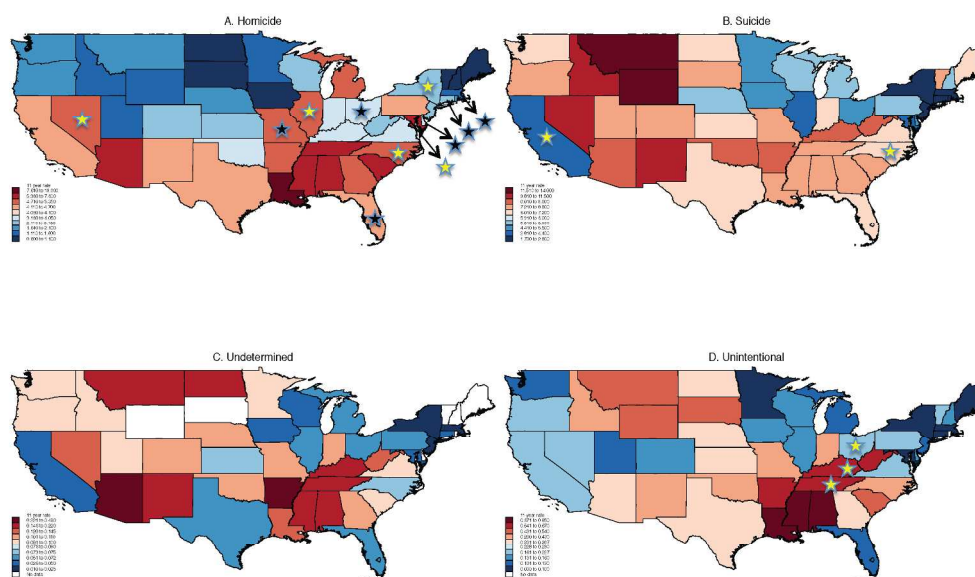

Figure 4: Firearm related fatality rates from 2000-2010 according to intent.

#### Homicide:

Firearm related fatality rates are 11-year cumulative age-adjusted rates per 100,000 persons from 2000 to 2010 for each of the 50 states and District of Columbia; ranging from 0.65 (NH) to 19.75 (DC) per 100,000.

The colors represent increasing rates from blue to red. White represents no data or states where the frequency was <10. Significant decline in 5 states (NV, IL, NC, NY and DC) are represented as gold stars and significant increase in MO, FL, OH, MA, CT, and DL as black stars. HI (11-year=0.79, change=-0.01, p-trend=0.68) and AK (11-year=3.54, change=0.001, p-trend=0.95) are not represented in the map.

#### Suicide:

Firearm related fatality rates are 11-year cumulative age-adjusted rates per 100,000 persons from 2000 to 2010 for each of the 50 states and District of Columbia; ranging from 1.61 (MA) to 13.79 (AK) per 100,000.

The colors represent increasing rates from blue to red. White represents no data or states where the frequency was <10. Significant decline in 2 states (CA and NC) are represented as gold stars and there were no states with significant increase. HI (11-year=2.10, change=-0.001, p-trend=0.95) and AK (11-year=13.79, change=0.11, p-trend=0.61) are not represented in the map.

#### Undetermined:

Firearm related fatality rates are 11-year cumulative age-adjusted rates per 100,000 persons from 2000 to 2010 for each of the 50 states and District of Columbia; ranging from 0.01 (NJ) to 0.47 (AK) per 100,000.

The colors represent increasing rates from blue to red. White represents no data or states where the frequency was <10. There was no significant decline or increasing state-specific trends. HI (11-year=ne) and AK (11-year=0.47) are not represented in the map.

#### Unintentional:

Firearm related fatality rates are 11-year cumulative age-adjusted rates per 100,000 persons from 2000 to 2010 for each of the 50 states and District of Columbia; ranging from 0.04 (MA) to 0.83 (LO) per 100,000.

The colors represent increasing rates from blue to red. White represents no data or states where the frequency was <10. Significant decline in 3 states (OH, KN and TN) are represented as gold stars and there



1  
2  
3  
4  
5  
6  
7  
8  
9  
10  
11  
12  
13  
14  
15  
16  
17  
18  
19  
20  
21  
22  
23  
24  
25  
26  
27  
28  
29  
30  
31  
32  
33  
34  
35  
36  
37  
38  
39  
40  
41  
42  
43  
44  
45  
46  
47  
48  
49  
50  
51  
52  
53  
54  
55  
56  
57  
58  
59  
60

were no states with significant increase. HI (11-year=0.08) and AK (11-year=0.29) are not represented in the map.  
254x190mm (300 x 300 DPI)

For peer review only

Supplementary Figure 1A:

Firearm deaths from 2000 to 2010 by U.S census regions among whites

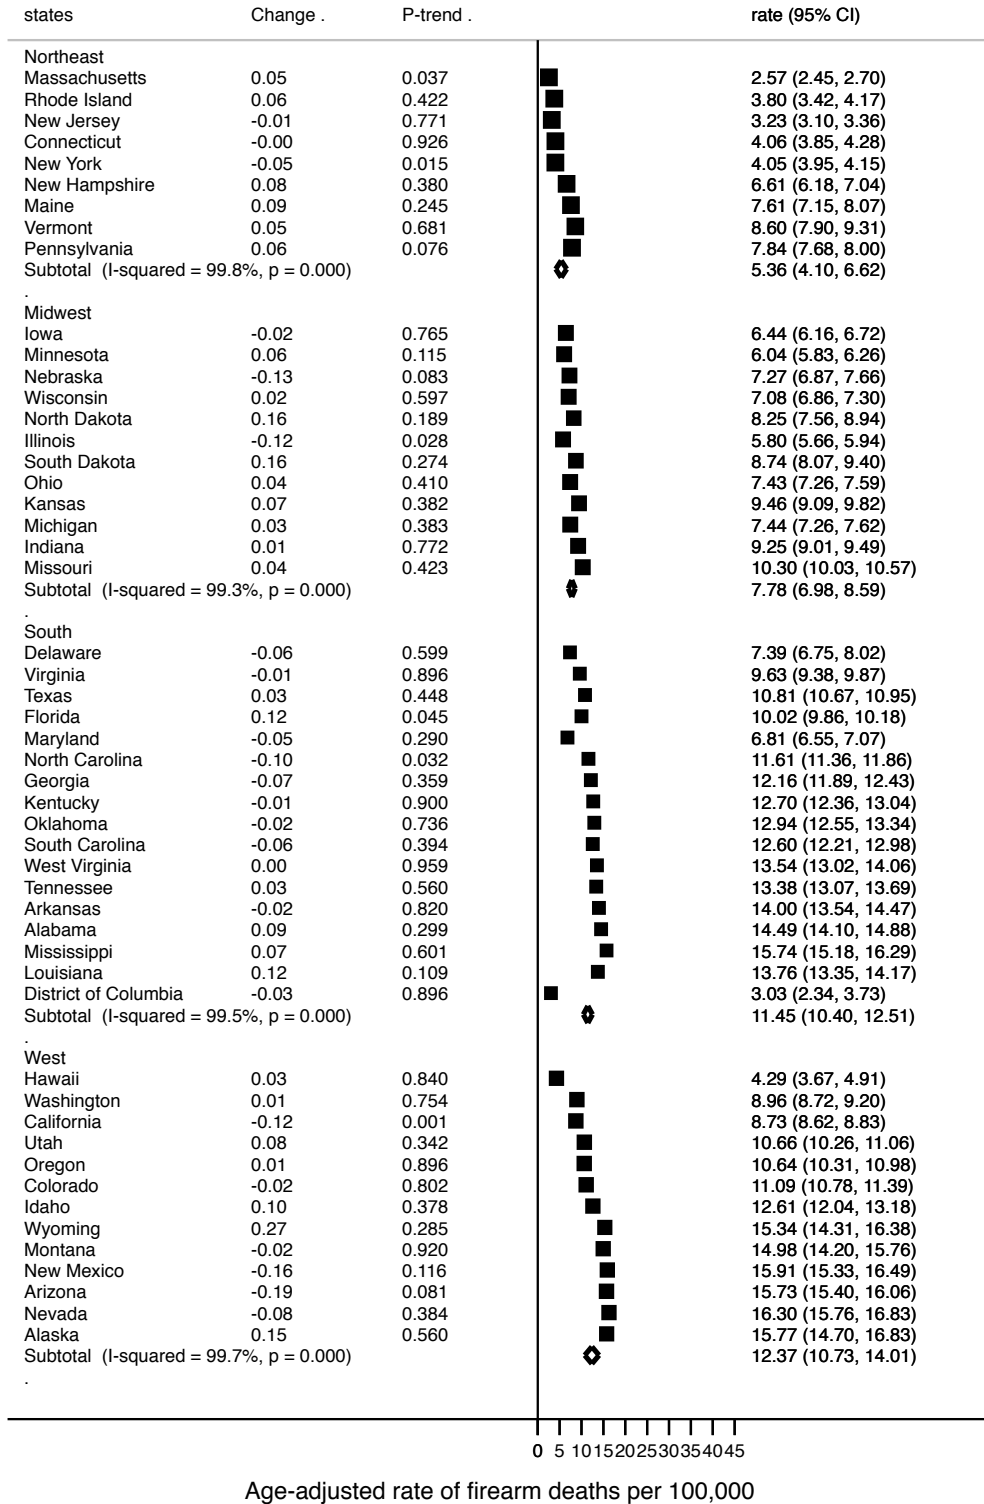

## Supplementary Figure 1B:

## Firearm deaths from 2000 to 2010 by U.S census regions among blacks



Supplementary Figure 1C

Firearm deaths from 2000 to 2010 by U.S census regions among other race

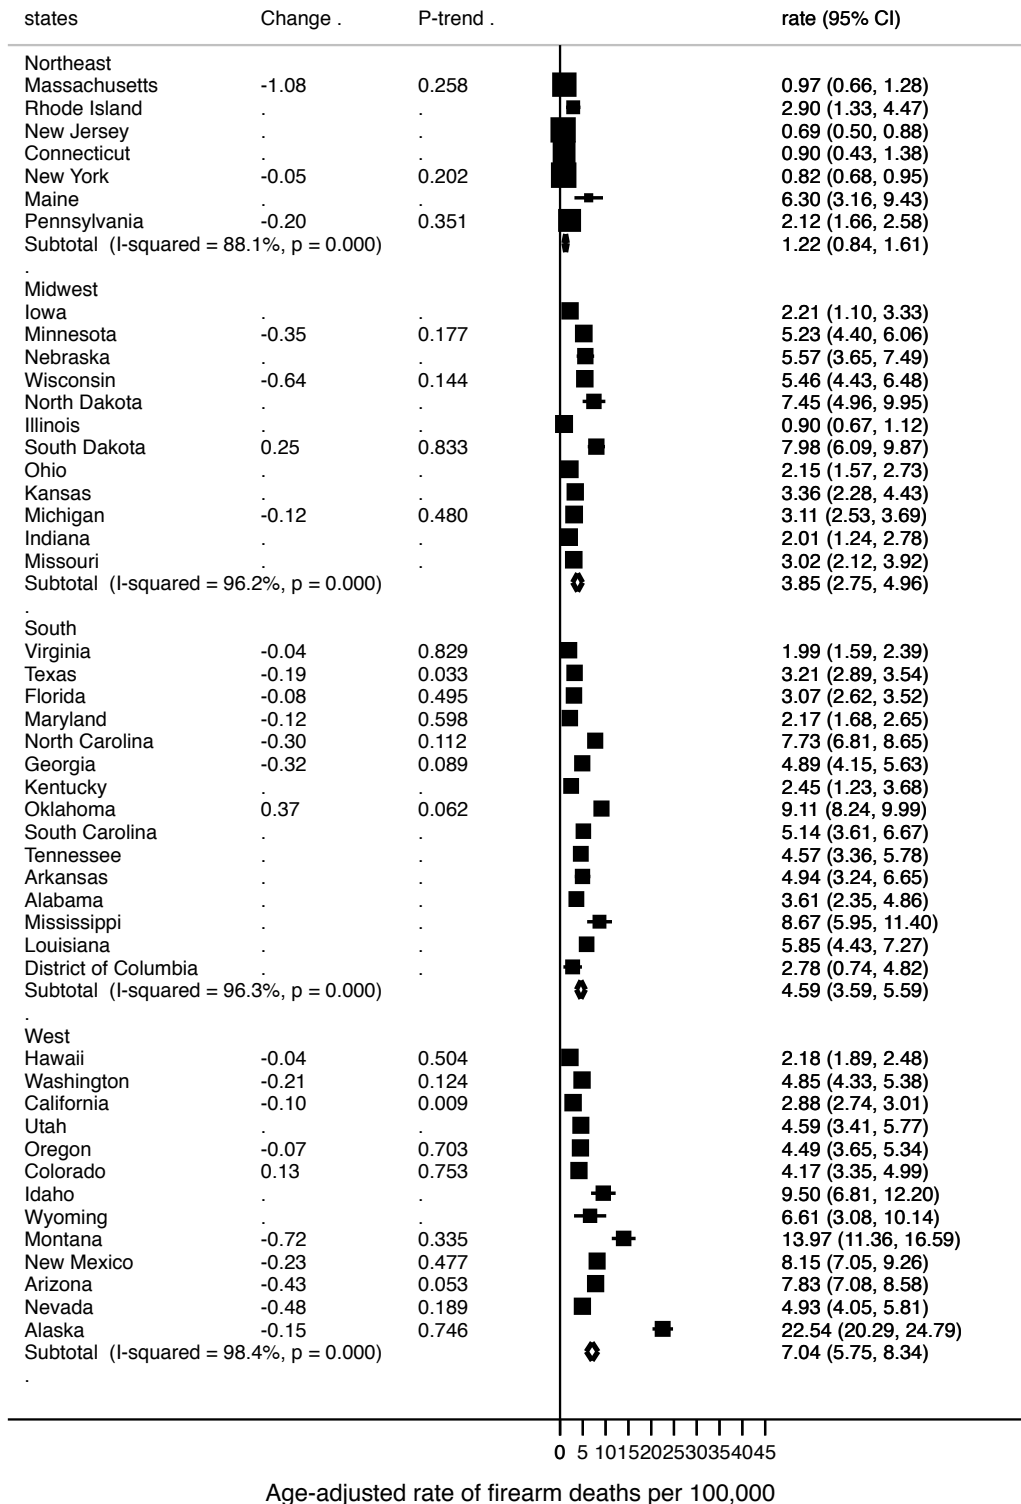

## Supplementary Figure 2A:

## Firearm deaths from 2000 to 2010 by U.S census regions among hispanics



Supplementary Figure 2B:

Firearm deaths from 2000 to 2010 by U.S census regions among non-hispani



## Supplementary Figure 3A:

## Firearm deaths due to homicide from 2000 to 2010 by U.S census regions

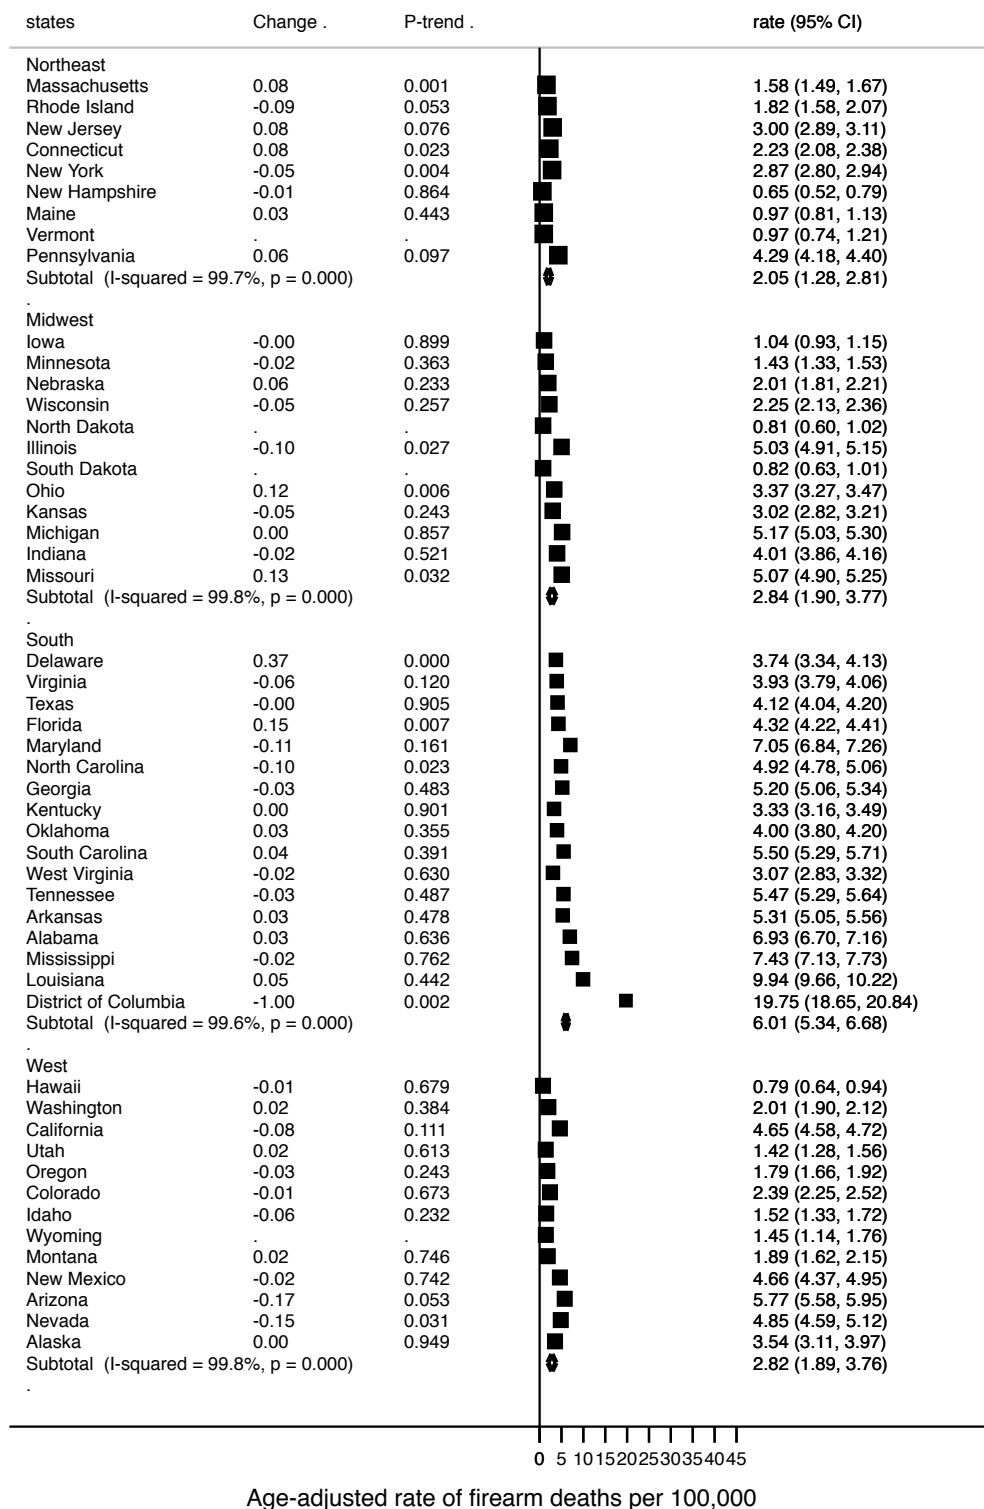

Supplementary Figure 3B:

Firearm deaths due to suicides from 2000 to 2010 by U.S census regions





Supplementary Figure 3C:

Undetermined firearm deaths from 2000 to 2010 by U.S census regions

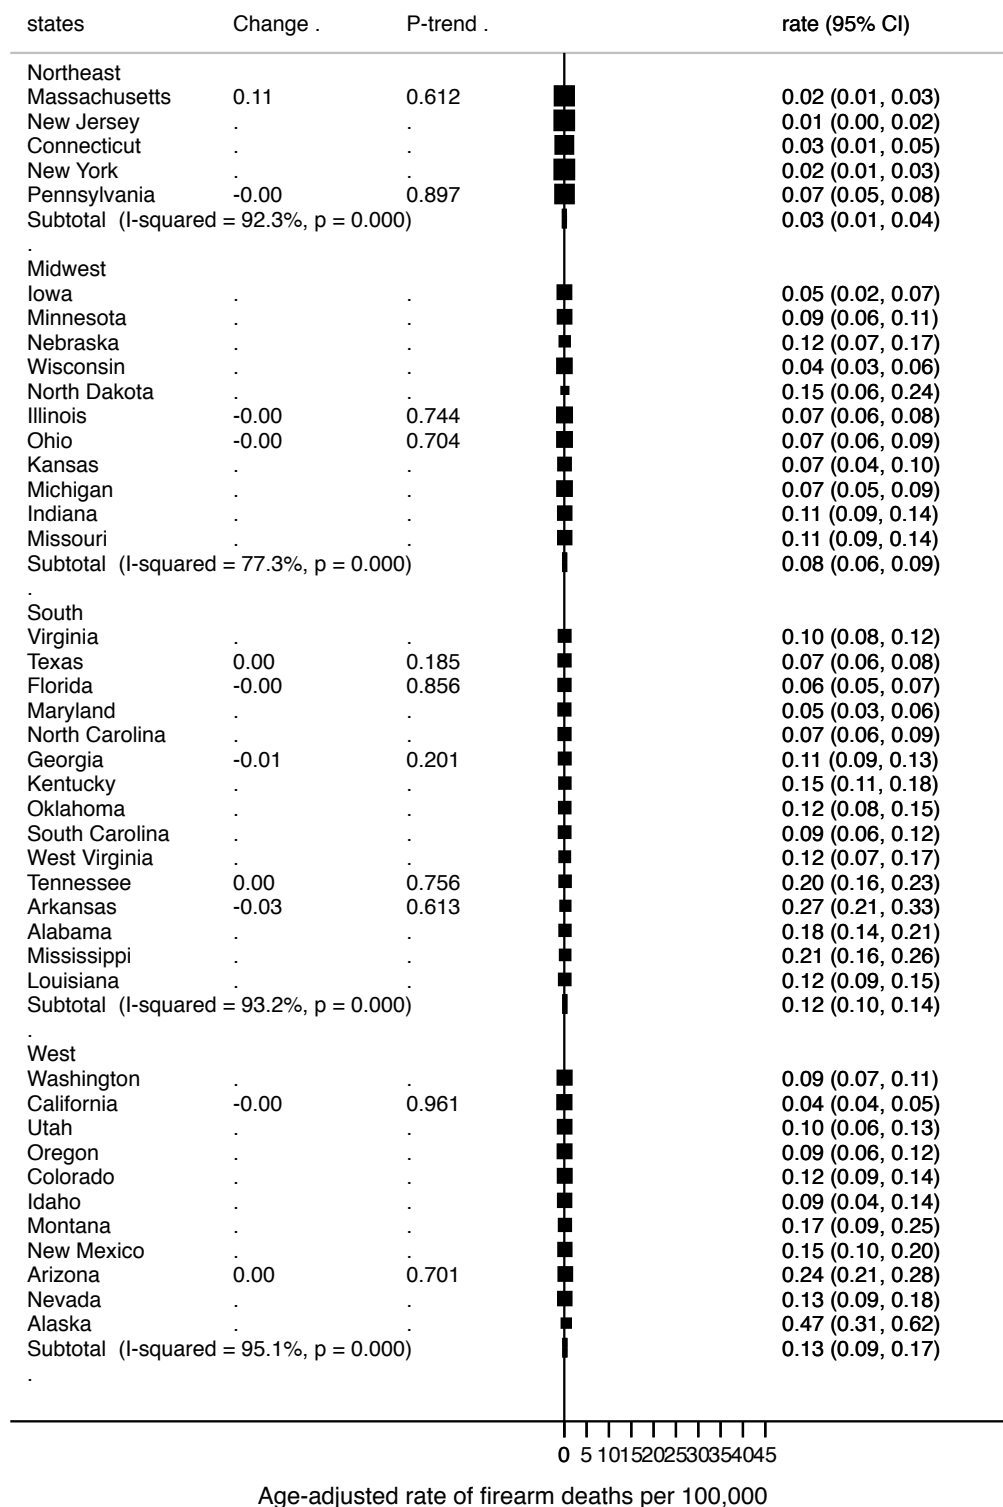

Supplementary Figure 3D:

Unintentional firearm deaths from 2000 to 2010 by U.S census regions

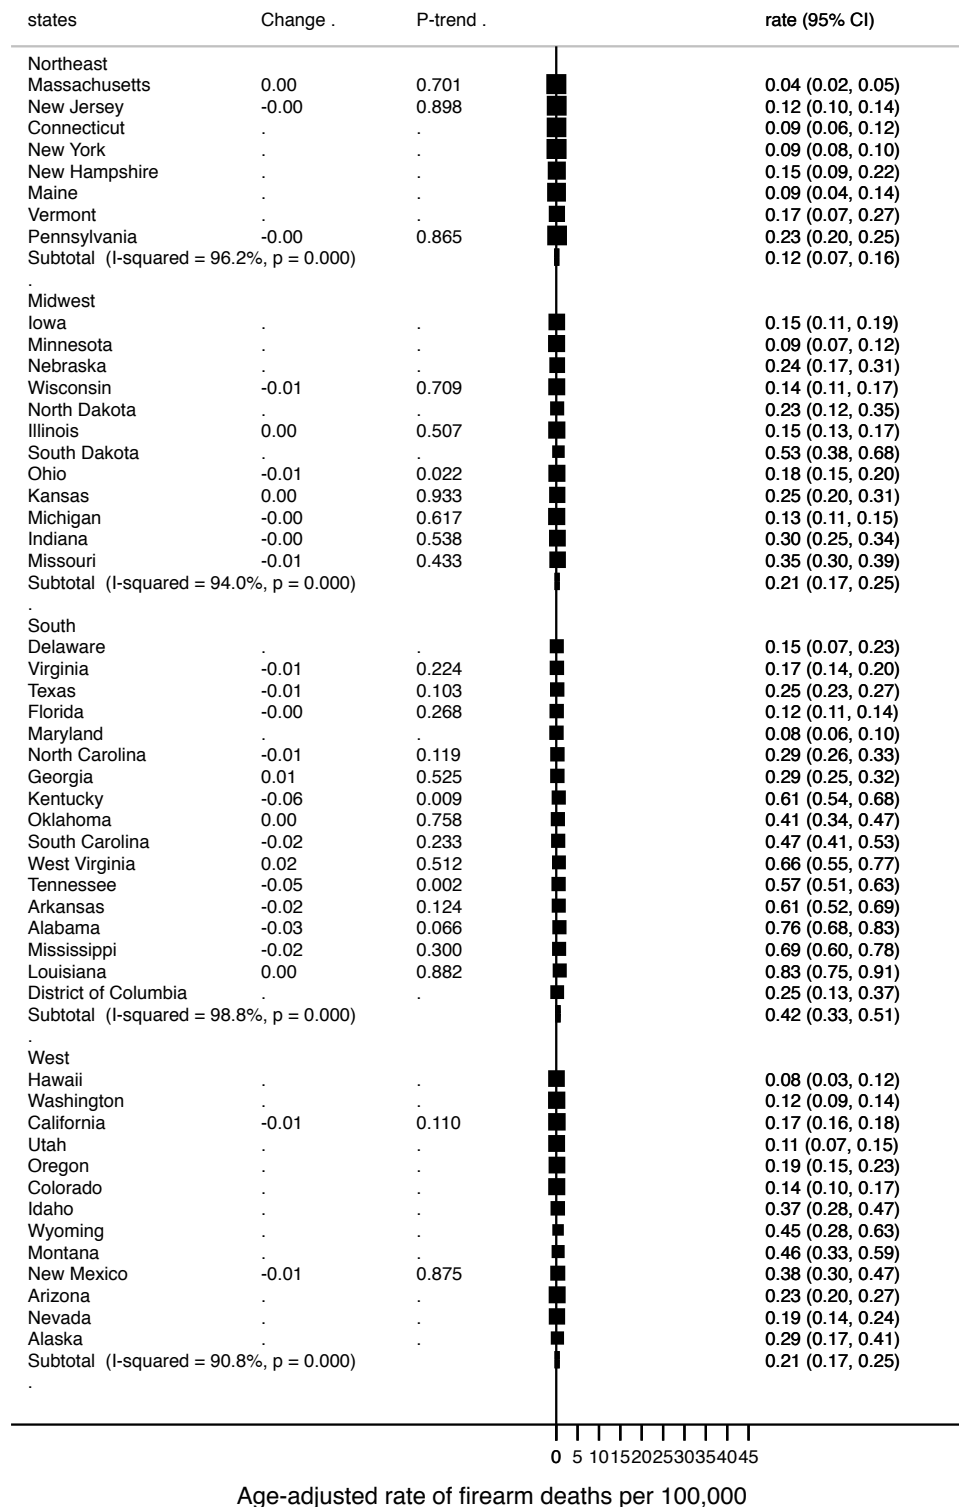

Supplementary Table 1: Firearm related trends in death, annual rate of change in death, lives lost and saved in the United States by states, WISQARS 2000 to 2010.

|                  | Age-adjusted firearm deaths per 100,000 population |       |       |       |       |       |       |       |       |       |       |       | Change in rate |                |         | Lives lost/ saved (-) |          |
|------------------|----------------------------------------------------|-------|-------|-------|-------|-------|-------|-------|-------|-------|-------|-------|----------------|----------------|---------|-----------------------|----------|
|                  | 2000                                               | 2001  | 2002  | 2003  | 2004  | 2005  | 2006  | 2007  | 2008  | 2009  | 2010  | Total | Annual         | 95% CI         | P-trend | 11 years              | Per year |
| All              | 10.14                                              | 10.31 | 10.43 | 10.29 | 9.99  | 10.27 | 10.22 | 10.24 | 10.23 | 10.05 | 10.07 | 10.21 | -0.17          | -0.044, 0.010  | 0.181   | -5527.8               | -502.5   |
| <b>Northeast</b> |                                                    |       |       |       |       |       |       |       |       |       |       |       |                |                |         |                       |          |
| Massachusetts    | 2.73                                               | 3.00  | 3.13  | 3.09  | 3.16  | 3.42  | 3.22  | 3.55  | 3.34  | 3.1   | 4.03  | 3.24  | 0.074          | 0.025, 0.122   | 0.008   | 52.4                  | 4.8      |
| Rhode Island     | 5.10                                               | 4.30  | 5.14  | 3.12  | 3.61  | 3.60  | 4.21  | 3.40  | 3.94  | 5.02  | 4.60  | 4.18  | -0.013         | -0.180, 0.155  | 0.869   | -1.5                  | -0.1     |
| New Jersey       | 4.11                                               | 4.44  | 4.88  | 5.42  | 5.37  | 5.15  | 5.82  | 5.25  | 4.94  | 4.70  | 5.20  | 5.03  | 0.063          | -0.035, 0.161  | 0.182   | 59.8                  | 5.4      |
| Connecticut      | 5.32                                               | 5.63  | 4.32  | 4.37  | 5.00  | 5.34  | 4.99  | 4.15  | 5.60  | 4.90  | 5.85  | 5.04  | 0.028          | -0.103, 0.159  | 0.637   | 10.8                  | 1.0      |
| New York         | 5.70                                               | 5.54  | 5.13  | 5.32  | 4.88  | 5.21  | 5.14  | 5.04  | 4.90  | 4.79  | 5.07  | 5.15  | -0.064         | -0.104, -0.023 | 0.006   | -134.9                | -12.3    |
| New Hampshire    | 6.27                                               | 7.23  | 5.91  | 6.8   | 5.02  | 6.62  | 6.22  | 5.56  | 6.86  | 6.34  | 8.22  | 6.49  | 0.065          | -0.126, 0.255  | 0.461   | 9.2                   | 0.8      |
| Maine            | 8.55                                               | 7.29  | 6.63  | 6.02  | 7.9   | 7.71  | 7.28  | 7.61  | 8.42  | 8.58  | 7.86  | 7.61  | 0.100          | -0.077, 0.277  | 0.232   | 14.4                  | 1.3      |
| Vermont          | 8.74                                               | 8.20  | 9.74  | 7.58  | 9.41  | 6.79  | 8.14  | 8.08  | 8.19  | 8.72  | 10.21 | 8.53  | 0.037          | -0.222, 0.296  | 0.753   | 2.5                   | 0.2      |
| Pennsylvania     | 10.15                                              | 9.53  | 9.96  | 9.87  | 10.2  | 10.76 | 10.9  | 10.52 | 10.53 | 10.41 | 10.11 | 10.27 | 0.064          | -0.014, 0.142  | 0.095   | 87.8                  | 8.0      |
| <b>Midwest</b>   |                                                    |       |       |       |       |       |       |       |       |       |       |       |                |                |         |                       |          |
| Iowa             | 6.46                                               | 6.37  | 6.73  | 6.94  | 6.45  | 6.71  | 6.34  | 4.99  | 7.25  | 6.23  | 6.8   | 6.5   | -0.017         | -0.157, 0.124  | 0.796   | -5.6                  | -0.5     |
| Minnesota        | 6.34                                               | 6.49  | 6.06  | 6.5   | 7.04  | 6.94  | 6.3   | 6.48  | 6.97  | 6.17  | 6.76  | 6.57  | 0.024          | -0.053, 0.101  | 0.495   | 13.5                  | 1.2      |
| Nebraska         | 9.77                                               | 8.12  | 8.05  | 7.64  | 6.71  | 7.67  | 7.69  | 7.95  | 8.27  | 7.26  | 8.16  | 7.94  | -0.071         | -0.231, 0.090  | 0.346   | -13.8                 | -1.3     |
| Wisconsin        | 7.99                                               | 8.70  | 8.08  | 8.44  | 7.37  | 8.48  | 7.56  | 8.54  | 7.72  | 7.91  | 8.57  | 8.14  | -0.008         | -0.113, 0.096  | 0.859   | -4.9                  | -0.4     |
| North Dakota     | 6.6                                                | 7.6   | 9.12  | 8.83  | 7.5   | 8.9   | 6.62  | 8.27  | 8.51  | 8.92  | 9.56  | 8.23  | 0.155          | -0.086, 0.395  | 0.180   | 11.1                  | 1.0      |
| Illinois         | 9.00                                               | 10.21 | 9.69  | 9.01  | 7.8   | 8.01  | 8.08  | 8.03  | 8.55  | 8.17  | 8.19  | 8.61  | -0.155         | -0.286, -0.025 | 0.025   | -215.3                | -19.6    |
| South Dakota     | 7.47                                               | 7.1   | 7.91  | 9.86  | 9.97  | 10.2  | 9.74  | 6.14  | 10.5  | 9.31  | 9.23  | 8.89  | 0.157          | -0.168, 0.481  | 0.304   | 13.5                  | 1.2      |
| Ohio             | 7.81                                               | 9.00  | 9.31  | 8.12  | 8.97  | 9.63  | 9.66  | 9.55  | 9.67  | 8.5   | 9.95  | 9.1   | 0.122          | -0.010, 0.253  | 0.066   | 153.8                 | 14.0     |
| Kansas           | 11.15                                              | 9.93  | 9.7   | 11.13 | 10.73 | 9.25  | 10.84 | 10.35 | 9.7   | 10.76 | 10.44 | 10.37 | -0.012         | -0.158, 0.135  | 0.860   | -3.6                  | -0.3     |
| Michigan         | 10.83                                              | 10.83 | 10.99 | 10.33 | 10.52 | 10.78 | 11.53 | 11.03 | 10.96 | 11.07 | 10.98 | 10.9  | 0.037          | -0.034, 0.109  | 0.271   | 40.6                  | 3.7      |
| Indiana          | 10.88                                              | 11.82 | 11.68 | 11.19 | 10.22 | 11.11 | 11.63 | 10.5  | 11.24 | 11.33 | 10.82 | 11.13 | -0.031         | -0.143, 0.081  | 0.546   | -21.4                 | -1.9     |
| Missouri         | 13.24                                              | 13.14 | 12.21 | 11.42 | 11.44 | 12.9  | 13    | 12.79 | 13.74 | 13.71 | 13.93 | 12.88 | 0.135          | -0.036, 0.306  | 0.108   | 86.1                  | 7.8      |
| <b>South</b>     |                                                    |       |       |       |       |       |       |       |       |       |       |       |                |                |         |                       |          |
| Delaware         | 6.66                                               | 9.47  | 9.07  | 7.86  | 8.78  | 8.78  | 9.19  | 8.91  | 10.65 | 8.76  | 9.88  | 8.89  | 0.201          | -0.018, 0.419  | 0.067   | 18.7                  | 1.7      |

1  
2  
3  
4  
5  
6  
7  
8  
9  
10  
11  
12  
13  
14  
15  
16  
17  
18  
19  
20  
21  
22  
23  
24  
25  
26  
27  
28  
29  
30  
31  
32  
33  
34  
35  
36  
37  
38  
39  
40  
41  
42  
43  
44  
45  
46  
47  
48  
49

|                      |       |       |       |       |       |       |       |       |       |       |       |       |        |                |       |        |       |
|----------------------|-------|-------|-------|-------|-------|-------|-------|-------|-------|-------|-------|-------|--------|----------------|-------|--------|-------|
| Virginia             | 11.13 | 10.61 | 11.01 | 10.86 | 10.81 | 11.48 | 10.36 | 10.4  | 10.18 | 10.28 | 10.69 | 10.71 | -0.068 | -0.149, 0.014  | 0.092 | -56.6  | -5.1  |
| Texas                | 10.57 | 11.22 | 10.83 | 11.21 | 10.66 | 11.09 | 10.47 | 10.89 | 10.83 | 10.98 | 10.93 | 10.89 | 0.001  | -0.054, 0.056  | 0.976 | 2.5    | 0.2   |
| Florida              | 10.19 | 10.68 | 10.97 | 11.05 | 10.46 | 9.95  | 11.05 | 12.02 | 12.18 | 11.98 | 11.44 | 11.12 | 0.160  | 0.038, 0.282   | 0.016 | 310.1  | 28.2  |
| Maryland             | 11.91 | 11.46 | 11.54 | 11.96 | 11.93 | 11.86 | 12.1  | 12.04 | 11.61 | 10.19 | 9.26  | 11.39 | -0.169 | -0.335, -0.002 | 0.048 | -103.5 | -9.4  |
| North Carolina       | 13.56 | 13.06 | 13.43 | 12.35 | 12.21 | 12.74 | 12.55 | 12.17 | 12.31 | 11.59 | 11.57 | 12.49 | -0.174 | -0.255, -0.092 | 0.001 | -168.1 | -15.3 |
| Georgia              | 13.4  | 13.44 | 13.39 | 13.72 | 12.16 | 12.05 | 12.54 | 13.4  | 12.43 | 13.06 | 12.62 | 12.92 | -0.076 | -0.197, 0.045  | 0.189 | -75.0  | -6.8  |
| Kentucky             | 13.25 | 12.69 | 13.04 | 13.38 | 13.04 | 12.94 | 12.47 | 14.11 | 13.28 | 12.78 | 12.48 | 13.05 | -0.020 | -0.140, 0.010  | 0.713 | -9.2   | -0.8  |
| Oklahoma             | 13.21 | 14.01 | 12.81 | 12.77 | 12.86 | 13.15 | 13.26 | 13.18 | 13.91 | 14.33 | 14.31 | 13.45 | 0.105  | -0.028, 0.238  | 0.108 | 41.3   | 3.8   |
| South Carolina       | 12.42 | 13.72 | 13.69 | 14.17 | 13.5  | 13.75 | 13.88 | 13.09 | 13.17 | 13.52 | 13.92 | 13.55 | 0.032  | -0.088, 0.152  | 0.561 | 15.2   | 1.4   |
| West Virginia        | 12.99 | 13.15 | 14.67 | 14.01 | 13.6  | 13.72 | 13.32 | 14.06 | 12.66 | 13.21 | 14.23 | 13.6  | 0.002  | -0.183, 0.188  | 0.978 | 0.4    | 0.0   |
| Tennessee            | 15.63 | 14.47 | 15.4  | 14.11 | 14.54 | 16.03 | 15.3  | 14.74 | 15.46 | 15.06 | 14.42 | 15.03 | -0.013 | -0.148, 0.123  | 0.837 | -8.6   | -0.8  |
| Arkansas             | 15.42 | 15.27 | 16.29 | 14.96 | 14.65 | 15.62 | 15.12 | 15.09 | 15.6  | 16.03 | 14.39 | 15.31 | -0.033 | -0.193, 0.126  | 0.648 | -10.1  | -0.9  |
| Alabama              | 17.14 | 16.41 | 16.08 | 16.8  | 14.79 | 15.99 | 16.7  | 17.24 | 17.31 | 17.18 | 16.18 | 16.53 | 0.045  | -0.128, 0.217  | 0.574 | 22.8   | 2.1   |
| Mississippi          | 16.56 | 17.64 | 17.34 | 16.81 | 16.41 | 15.98 | 16.54 | 18.28 | 19.25 | 16.65 | 16.05 | 17.06 | 0.015  | -0.209, 0.239  | 0.883 | 4.8    | 0.4   |
| Louisiana            | 17.58 | 17.46 | 19.31 | 18.61 | 19.52 | 18.35 | 19.02 | 19.77 | 18.34 | 18.03 | 19.11 | 18.62 | 0.082  | -0.081, 0.244  | 0.286 | 40.4   | 3.7   |
| District of Columbia | 22.24 | 25.46 | 29.79 | 25.71 | 22.64 | 23.47 | 19.99 | 21.66 | 20.01 | 15.96 | 14.62 | 21.71 | -1.067 | -1.621, -0.512 | 0.002 | -67.7  | -6.2  |
| <b>West</b>          |       |       |       |       |       |       |       |       |       |       |       |       |        |                |       |        |       |
| Hawaii               | 4.2   | 3.74  | 2.82  | 2.88  | 3.1   | 2.14  | 2.38  | 2.44  | 3.04  | 3.34  | 3.21  | 3.02  | -0.057 | -0.190, 0.076  | 0.359 | -8.1   | -0.7  |
| Washington           | 8.94  | 8.53  | 9.34  | 9.17  | 9.17  | 8.8   | 8.37  | 8.32  | 8.69  | 9.14  | 8.92  | 8.85  | -0.018 | -0.099, 0.063  | 0.623 | -12.5  | -1.1  |
| California           | 9.27  | 9.31  | 9.75  | 9.78  | 9.24  | 9.52  | 9.15  | 8.84  | 8.5   | 8.17  | 7.7   | 9.01  | -0.166 | -0.249, -0.083 | 0.001 | -652.3 | -59.3 |
| Utah                 | 9.93  | 10.99 | 9.6   | 10.51 | 10.13 | 9.91  | 9.75  | 10.63 | 9.68  | 10.46 | 12.16 | 10.39 | 0.081  | -0.077, 0.240  | 0.276 | 22.1   | 2.0   |
| Oregon               | 10.81 | 10.16 | 10.49 | 10.72 | 10.36 | 10.68 | 10.16 | 9.91  | 9.73  | 10.31 | 11.33 | 10.44 | -0.011 | -0.127, 0.106  | 0.839 | -4.4   | -0.4  |
| Colorado             | 10.36 | 11.68 | 11.47 | 11.13 | 11.96 | 11.53 | 10.33 | 10.38 | 10.39 | 11.58 | 10.72 | 11.05 | -0.045 | -0.183, 0.092  | 0.474 | -23.1  | -2.1  |
| Idaho                | 10.19 | 13.5  | 12.42 | 12.33 | 13.04 | 13.94 | 12.69 | 12.75 | 11.4  | 12.85 | 12.73 | 12.56 | 0.077  | -0.148, 0.302  | 0.459 | 12.1   | 1.1   |
| Wyoming              | 11.72 | 13.91 | 18.87 | 17.46 | 11.15 | 13.39 | 14.85 | 14.66 | 16.91 | 17.59 | 15.54 | 15.09 | 0.267  | -0.257, 0.791  | 0.279 | 15.3   | 1.4   |
| Montana              | 14.85 | 17.77 | 14.61 | 15.68 | 13.05 | 16.85 | 12.25 | 13.54 | 15.73 | 16.04 | 15.56 | 15.11 | -0.040 | -0.420, 0.341  | 0.819 | -4.2   | -0.4  |
| New Mexico           | 16.08 | 15.26 | 16.61 | 17.55 | 15.15 | 13.89 | 14.45 | 14.85 | 14.68 | 14.48 | 14.84 | 15.23 | -0.184 | -0.376, 0.008  | 0.058 | -39.2  | -3.6  |
| Arizona              | 15.58 | 15.92 | 17.89 | 15.29 | 15.84 | 16    | 16.22 | 15.38 | 14.36 | 13.49 | 14.53 | 15.47 | -0.230 | -0.423, -0.036 | 0.025 | -147.2 | -13.4 |
| Nevada               | 17.26 | 16.54 | 17.06 | 17.04 | 16.74 | 16.09 | 16.3  | 15.87 | 15.15 | 15.11 | 14.49 | 16.07 | -0.264 | -0.441, -0.086 | 0.008 | -69.9  | -6.4  |

1  
2  
3  
4  
5  
6  
7  
8  
9  
10  
11  
12  
13  
14  
15  
16  
17  
18  
19  
20  
21  
22  
23  
24  
25  
26  
27  
28  
29  
30  
31  
32  
33  
34  
35  
36  
37  
38  
39  
40  
41  
42  
43  
44  
45  
46  
47  
48  
49

|        |       |       |       |       |       |       |       |       |       |       |       |       |       |               |       |     |     |
|--------|-------|-------|-------|-------|-------|-------|-------|-------|-------|-------|-------|-------|-------|---------------|-------|-----|-----|
| Alaska | 17.96 | 14.83 | 19.89 | 19.24 | 17.51 | 17.47 | 16.94 | 18.22 | 20.92 | 14.68 | 20.51 | 18.09 | 0.102 | -0.375, 0.580 | 0.639 | 7.5 | 0.7 |
|--------|-------|-------|-------|-------|-------|-------|-------|-------|-------|-------|-------|-------|-------|---------------|-------|-----|-----|

All values are age-adjusted rates per 100,000 population.  
 Change denotes annual change in rate per 100,000. Negative value indicates decline in firearm death rates per 100,000 from 2000 to 2010 and positive value indicates increase in firearm death rate per 100,000 from 2000 to 2010.  
 CI denotes confidence intervals of the annual change in firearm death rate per 100,000.  
 P-trend calculated using meta-regression indicates the significance of the decline or the increase in firearm related death rates from 2000 to 2010.  
 Lives lost or saved are calculated by applying annual change to the total 11-year population from 2000 to 2010. The annual lives lost or saved are the total/ 11 years. Negative denotes lives saved and positive values are lives lost.  
 Data are from Center for Disease Control and Prevention (CDC)'s National center for Injury Prevention and Control Web-based Injury Statistics Query and Reporting System (WISQARS).

Supplementary Table 2: US states with significant racial and ethnic trends within firearm fatality rates

|              |               | GA           | IN           | KA           | MN           | OK           | OR           | PA           | TX           | UT           |
|--------------|---------------|--------------|--------------|--------------|--------------|--------------|--------------|--------------|--------------|--------------|
| Overall      | FRF rate      | 12.92        | 11.13        | 10.37        | 6.57         | 13.45        | 10.44        | 10.27        | 10.89        | 10.39        |
|              | Change        | -0.08        | -0.03        | -0.01        | 0.02         | 0.11         | -0.01        | 0.06         | 0.001        | 0.08         |
|              | P-trend       | 0.19         | 0.55         | 0.86         | 0.49         | 0.11         | 0.84         | 0.095        | 0.98         | 0.28         |
| Whites       | FRF rate      | 12.16        | 9.25         | 9.46         | 6.04         | 12.94        | 10.64        | 7.84         | 10.81        | 10.66        |
|              | Change        | -0.07        | 0.01         | 0.07         | 0.06         | -0.02        | 0.01         | 0.06         | 0.03         | 0.08         |
|              | P-trend       | 0.36         | 0.77         | 0.38         | 0.12         | 0.74         | 0.89         | 0.076        | 0.45         | 0.34         |
|              | Pop % change  | -3.8         | -2.0         | -1.7         | -3.3         | -2.2         | -2.0         | -2.6         | -2.3         | -1.4         |
| Blacks       | FRF rate      | 14.05        | 28.92        | 24.14        | 13.52        | 20.04        | 11.47        | 27.48        | 13.37        | 7.73         |
|              | Change        | -0.06        | <b>-0.66</b> | <b>-1.07</b> | <b>-0.61</b> | <b>0.93</b>  | -0.67        | -0.14        | -0.09        | ne           |
|              | P-trend       | 0.57         | <b>0.012</b> | <b>0.021</b> | <b>0.038</b> | <b>0.008</b> | 0.23         | 0.59         | 0.60         | ne           |
|              | Pop % change  | 2.3          | 1.2          | 0.6          | 1.9          | 0.4          | 0.4          | 1.3          | 0.6          | 0.5          |
| Other        | FRF rate      | 4.89         | 2.01         | 3.36         | 5.23         | 9.11         | 4.49         | 2.12         | 3.21         | 4.59         |
|              | Change        | -0.32        | ne           | ne           | -0.35        | <b>0.37</b>  | -0.07        | -0.20        | <b>-0.19</b> | ne           |
|              | P-trend       | 0.089        | ne           | ne           | 0.18         | <b>0.062</b> | 0.70         | 0.35         | <b>0.033</b> | ne           |
|              | Pop % change  | 1.5          | 0.8          | 1.0          | 1.4          | 1.8          | 1.5          | 1.2          | 1.7          | 0.9          |
| Hispanic     | FRF rate      | 8.02         | 8.19         | 8.05         | 4.65         | 7.92         | 4.83         | 9.11         | 7.04         | 7.88         |
|              | Change        | <b>-0.54</b> | -0.18        | -0.15        | -0.48        | -0.26        | <b>-0.33</b> | <b>-0.39</b> | <b>-0.21</b> | <b>-0.79</b> |
|              | P-trend       | <b>0.012</b> | 0.33         | 0.49         | 0.31         | 0.21         | <b>0.037</b> | <b>0.065</b> | <b>0.004</b> | <b>0.030</b> |
|              | Pop % change  | 3.5          | 2.5          | 3.5          | 1.8          | 3.7          | 3.7          | 2.5          | 5.6          | 3.9          |
| Non-Hispanic | FRF rate      | 13.15        | 11.18        | 10.38        | 6.60         | 13.73        | 10.76        | 10.25        | 12.28        | 10.53        |
|              | Change        | -0.02        | -0.04        | 0.01         | 0.05         | <b>0.15</b>  | 0.03         | <b>0.08</b>  | <b>0.14</b>  | <b>-0.15</b> |
|              | P-trend       | 0.73         | 0.45         | 0.91         | 0.21         | <b>0.045</b> | 0.56         | <b>0.039</b> | <b>0.022</b> | <b>0.001</b> |
|              | Pop % change  | -3.5         | -2.5         | -3.5         | -1.8         | -3.7         | -3.7         | -2.5         | -5.6         | -3.9         |
| Intent       | Homicide      | ↔            | ↔            | ↔            | ↔            | ↔            | ↔            | ↔            | ↔            | ↔            |
|              | Suicides      | ↔            | ↔            | ↔            | ↔            | ↔            | ↔            | ↔            | ↔            | ↔            |
|              | Undetermined  | ↔            | ne           | ne           | ne           | ne           | ne           | ↔            | ↔            | ne           |
|              | Unintentional | ↔            | ↔            | ↔            | ne           | ↔            | ne           | ↔            | ↔            | ne           |

FRF: firearm related fatality, Pop % change: change in population percentage from 2000 to 2010. All values are age-adjusted rates per 100,000 population. Change denotes annual change in rate per 100,000. Negative value indicates decline in firearm death rates per 100,000 from 2000 to 2010 and positive value indicates increase in firearm death rate per 100,000 from 2000 to 2010. CI denotes confidence intervals of the annual change in firearm death rate per 100,000. SMD indicates standardized mean difference; is equal to annual change/standard deviation. P-trend calculated using meta-regression indicates the significance of the decline or the increase in firearm related death rates from 2000 to 2010. Data are from Center for Disease Control and Prevention (CDC)'s National center for Injury Prevention and Control Web-based Injury Statistics Query and Reporting System (WISQARS)

**STROBE 2007 (v4) checklist of items to be included in reports of observational studies in epidemiology\***  
**Checklist for cohort, case-control, and cross-sectional studies (combined)**

| Section/Topic             | Item # | Recommendation                                                                                                                                                                                                                                                                                                                                                                                                                                                         | Reported on page # |
|---------------------------|--------|------------------------------------------------------------------------------------------------------------------------------------------------------------------------------------------------------------------------------------------------------------------------------------------------------------------------------------------------------------------------------------------------------------------------------------------------------------------------|--------------------|
| Title and abstract        | 1      | (a) Indicate the study's design with a commonly used term in the title or the abstract                                                                                                                                                                                                                                                                                                                                                                                 | 3                  |
|                           |        | (b) Provide in the abstract an informative and balanced summary of what was done and what was found                                                                                                                                                                                                                                                                                                                                                                    | 3                  |
| <b>Introduction</b>       |        |                                                                                                                                                                                                                                                                                                                                                                                                                                                                        |                    |
| Background/rationale      | 2      | Explain the scientific background and rationale for the investigation being reported                                                                                                                                                                                                                                                                                                                                                                                   | 5                  |
| Objectives                | 3      | State specific objectives, including any pre-specified hypotheses                                                                                                                                                                                                                                                                                                                                                                                                      | 5                  |
| <b>Methods</b>            |        |                                                                                                                                                                                                                                                                                                                                                                                                                                                                        |                    |
| Study design              | 4      | Present key elements of study design early in the paper                                                                                                                                                                                                                                                                                                                                                                                                                | 6                  |
| Setting                   | 5      | Describe the setting, locations, and relevant dates, including periods of recruitment, exposure, follow-up, and data collection                                                                                                                                                                                                                                                                                                                                        | 6                  |
| Participants              | 6      | (a) <i>Cohort study</i> —Give the eligibility criteria, and the sources and methods of selection of participants. Describe methods of follow-up<br><i>Case-control study</i> —Give the eligibility criteria, and the sources and methods of case ascertainment and control selection. Give the rationale for the choice of cases and controls<br><i>Cross-sectional study</i> —Give the eligibility criteria, and the sources and methods of selection of participants | 6                  |
|                           |        | (b) <i>Cohort study</i> —For matched studies, give matching criteria and number of exposed and unexposed<br><i>Case-control study</i> —For matched studies, give matching criteria and the number of controls per case                                                                                                                                                                                                                                                 |                    |
| Variables                 | 7      | Clearly define all outcomes, exposures, predictors, potential confounders, and effect modifiers. Give diagnostic criteria, if applicable                                                                                                                                                                                                                                                                                                                               | 6                  |
| Data sources/ measurement | 8*     | For each variable of interest, give sources of data and details of methods of assessment (measurement). Describe comparability of assessment methods if there is more than one group                                                                                                                                                                                                                                                                                   | 6                  |
| Bias                      | 9      | Describe any efforts to address potential sources of bias                                                                                                                                                                                                                                                                                                                                                                                                              | 16-17              |
| Study size                | 10     | Explain how the study size was arrived at                                                                                                                                                                                                                                                                                                                                                                                                                              | 6                  |
| Quantitative variables    | 11     | Explain how quantitative variables were handled in the analyses. If applicable, describe which groupings were chosen and why                                                                                                                                                                                                                                                                                                                                           | 6                  |
| Statistical methods       | 12     | (a) Describe all statistical methods, including those used to control for confounding                                                                                                                                                                                                                                                                                                                                                                                  | 7                  |
|                           |        | (b) Describe any methods used to examine subgroups and interactions                                                                                                                                                                                                                                                                                                                                                                                                    | 7                  |
|                           |        | (c) Explain how missing data were addressed                                                                                                                                                                                                                                                                                                                                                                                                                            | na                 |
|                           |        | (d) <i>Cohort study</i> —If applicable, explain how loss to follow-up was addressed<br><i>Case-control study</i> —If applicable, explain how matching of cases and controls was addressed                                                                                                                                                                                                                                                                              | 7                  |

|                          |     |                                                                                                                                                                                                              |       |
|--------------------------|-----|--------------------------------------------------------------------------------------------------------------------------------------------------------------------------------------------------------------|-------|
|                          |     | <i>Cross-sectional study</i> —If applicable, describe analytical methods taking account of sampling strategy                                                                                                 |       |
|                          |     | (e) Describe any sensitivity analyses                                                                                                                                                                        | na    |
| <b>Results</b>           |     |                                                                                                                                                                                                              |       |
| Participants             | 13* | (a) Report numbers of individuals at each stage of study—eg numbers potentially eligible, examined for eligibility, confirmed eligible, included in the study, completing follow-up, and analysed            | 8     |
|                          |     | (b) Give reasons for non-participation at each stage                                                                                                                                                         | na    |
|                          |     | (c) Consider use of a flow diagram                                                                                                                                                                           | na    |
| Descriptive data         | 14* | (a) Give characteristics of study participants (eg demographic, clinical, social) and information on exposures and potential confounders                                                                     | na    |
|                          |     | (b) Indicate number of participants with missing data for each variable of interest                                                                                                                          | na    |
|                          |     | (c) <i>Cohort study</i> —Summarise follow-up time (eg, average and total amount)                                                                                                                             | na    |
| Outcome data             | 15* | <i>Cohort study</i> —Report numbers of outcome events or summary measures over time                                                                                                                          | na    |
|                          |     | <i>Case-control study</i> —Report numbers in each exposure category, or summary measures of exposure                                                                                                         | na    |
|                          |     | <i>Cross-sectional study</i> —Report numbers of outcome events or summary measures                                                                                                                           | 8-11  |
| Main results             | 16  | (a) Give unadjusted estimates and, if applicable, confounder-adjusted estimates and their precision (eg, 95% confidence interval). Make clear which confounders were adjusted for and why they were included | 8-11  |
|                          |     | (b) Report category boundaries when continuous variables were categorized                                                                                                                                    | na    |
|                          |     | (c) If relevant, consider translating estimates of relative risk into absolute risk for a meaningful time period                                                                                             | na    |
| Other analyses           | 17  | Report other analyses done—eg analyses of subgroups and interactions, and sensitivity analyses                                                                                                               | 8-11  |
| <b>Discussion</b>        |     |                                                                                                                                                                                                              |       |
| Key results              | 18  | Summarise key results with reference to study objectives                                                                                                                                                     | 12    |
| Limitations              | 19  | Discuss limitations of the study, taking into account sources of potential bias or imprecision. Discuss both direction and magnitude of any potential bias                                                   | 16-17 |
| Interpretation           | 20  | Give a cautious overall interpretation of results considering objectives, limitations, multiplicity of analyses, results from similar studies, and other relevant evidence                                   | 12-16 |
| Generalisability         | 21  | Discuss the generalisability (external validity) of the study results                                                                                                                                        | na    |
| <b>Other information</b> |     |                                                                                                                                                                                                              |       |
| Funding                  | 22  | Give the source of funding and the role of the funders for the present study and, if applicable, for the original study on which the present article is based                                                | na    |

\*Give information separately for cases and controls in case-control studies and, if applicable, for exposed and unexposed groups in cohort and cross-sectional studies.

**Note:** An Explanation and Elaboration article discusses each checklist item and gives methodological background and published examples of transparent reporting. The STROBE checklist is best used in conjunction with this article (freely available on the Web sites of PLoS Medicine at <http://www.plosmedicine.org/>, Annals of Internal Medicine at <http://www.annals.org/>, and Epidemiology at <http://www.epidem.com/>). Information on the STROBE Initiative is available at [www.strobe-statement.org](http://www.strobe-statement.org).



# BMJ Open

## State-specific, racial and ethnic heterogeneity in trends of firearm-related fatality rates in the United States from 2000-2010

|                                 |                                                                                                                                                                                                                                                                                                                                                                                                                                                                                   |
|---------------------------------|-----------------------------------------------------------------------------------------------------------------------------------------------------------------------------------------------------------------------------------------------------------------------------------------------------------------------------------------------------------------------------------------------------------------------------------------------------------------------------------|
| Journal:                        | <i>BMJ Open</i>                                                                                                                                                                                                                                                                                                                                                                                                                                                                   |
| Manuscript ID:                  | bmjopen-2014-005628.R2                                                                                                                                                                                                                                                                                                                                                                                                                                                            |
| Article Type:                   | Research                                                                                                                                                                                                                                                                                                                                                                                                                                                                          |
| Date Submitted by the Author:   | 13-Jul-2014                                                                                                                                                                                                                                                                                                                                                                                                                                                                       |
| Complete List of Authors:       | Kalesan, Bindu; Columbia University, Surgery and Epidemiology<br>Vasan, Sowmya; Columbia University, Surgery<br>Mobily, Matthew; Columbia University, Epidemiology<br>Villarreal, Marcos; Columbia University, Epidemiology<br>Hlavacek, Patrick; Columbia University, Epidemiology<br>Teperman, Sheldon; Jacobi Medical Center, Trauma and Critical Care Services<br>Fagan, Jeffrey; Columbia University, Law & Epidemiology<br>Galea, Sandro; Columbia University, Epidemiology |
| <b>Primary Subject Heading</b>: | Public health                                                                                                                                                                                                                                                                                                                                                                                                                                                                     |
| Secondary Subject Heading:      | Public health, Epidemiology                                                                                                                                                                                                                                                                                                                                                                                                                                                       |
| Keywords:                       | EPIDEMIOLOGY, PREVENTIVE MEDICINE, PUBLIC HEALTH, STATISTICS & RESEARCH METHODS                                                                                                                                                                                                                                                                                                                                                                                                   |
|                                 |                                                                                                                                                                                                                                                                                                                                                                                                                                                                                   |

SCHOLARONE™  
Manuscripts

only

1  
2  
3 July 11, 2014  
4  
5  
6

7 **Title: State-specific, racial and ethnic heterogeneity in trends of firearm-**  
8 **related fatality rates in the United States from 2000-2010**  
9

10 Corresponding author:

11 Bindu Kalesan  
12 Department of Surgery & Epidemiology,  
13 Columbia University,  
14 650 W 168<sup>th</sup> Street Room 210  
15 New York, NY, USA  
16 Email: [kb2693@cumc.columbia.edu](mailto:kb2693@cumc.columbia.edu)  
17 Tel: 212-305-8880  
18  
19

20  
21 Co-authors:

22 Sowmya Vasam  
23 Department of Surgery,  
24 Columbia University,  
25 New York, NY, USA  
26 Email: [sv2436@cumc.columbia.edu](mailto:sv2436@cumc.columbia.edu)  
27  
28

29  
30 Matthew E Mobily  
31 Department of Epidemiology,  
32 Columbia University,  
33 New York, NY, USA  
34 Email: [mem2292@columbia.edu](mailto:mem2292@columbia.edu)  
35  
36

37 Marcos D Villarreal  
38 Department of Epidemiology,  
39 Columbia University,  
40 New York, NY, USA  
41 Email: [mdv2119@columbia.edu](mailto:mdv2119@columbia.edu)  
42  
43

44 Patrick Hlavacek  
45 Department of Epidemiology,  
46 Columbia University,  
47 New York, NY, USA  
48 Email: [ph2394@columbia.edu](mailto:ph2394@columbia.edu)  
49  
50

51 Sheldon Teperman  
52 Trauma and Critical Care Services,  
53 Jacobi Medical Center  
54 Bronx, NY, USA  
55 Email: [Sheldon.Teperman@nbhn.net](mailto:Sheldon.Teperman@nbhn.net)  
56  
57  
58  
59  
60

1  
2  
3 Jeffrey A Fagan  
4 Department of Law & Epidemiology,  
5 Columbia University,  
6 New York, NY, USA  
7 Email: [jfagan@law.columbia.edu](mailto:jfagan@law.columbia.edu)  
8  
9

10 Sandro Galea  
11 Department of Epidemiology,  
12 Columbia University,  
13 New York, NY, USA  
14 Email: [sgalea@cumc.columbia.edu](mailto:sgalea@cumc.columbia.edu)  
15  
16

17  
18  
19  
20  
21  
22  
23 Keywords: firearms, temporal trends, mortality  
24

25 Word count: 2997  
26  
27  
28  
29  
30  
31  
32  
33  
34  
35  
36  
37  
38  
39  
40  
41  
42  
43  
44  
45  
46  
47  
48  
49  
50  
51  
52  
53  
54  
55  
56  
57  
58  
59  
60

**Abstract:**

**Objectives:** To document overall, racial, ethnic and intent-specific spatio-temporal trends of firearm related fatality rates (FRF-rate) in the United States.

**Design:** Cross-sectional study per year from 2000 to 2010.

**Setting:** United States.

**Participants:** Aggregate count of all people in the US from 2000 to 2010.

**Outcome measures:** Data from the Web-based Injury Statistics Query and Reporting System from 2000-2010 was used to determine annual FRF-rates per 100,000 and by states, race, ethnicity and intent.

**Results:** The average national 11-year FRF-rate was 10.21 per 100,000, from 3.02 to 18.62 in Louisiana: 60% of states had higher than national rates and 41 states showed no temporal change. The average national FRF-rates among blacks and whites were 18.51 and 9.05 per 100,000 and among Hispanics and non-Hispanics were 7.13 and 10.13 per 100,000; Hispanics had a decreasing change of -0.18,  $p$ -trend<0.0001. In states with increasing trends (Florida and Massachusetts), whites and non-Hispanics drove the rise; while in states with decreasing trends (California, North Carolina, Arizona, Nevada, New York, Illinois, Maryland), Hispanics and blacks drove the fall. The average national FRF-rates due to homicides (4.1 per 100,000) and suicides (5.8 per 100,000) remained constant, but varied between states.

**Conclusion:** Endemic national FRF-rates mask a wide variation in time trends between states. FRF-rates were twice as high in blacks than whites but decreased

1  
2  
3 among Hispanics. Efforts to identify state-specific best practices can contribute to  
4  
5 changes in national FRF-rates that remain high.  
6  
7  
8  
9  
10  
11  
12  
13  
14  
15  
16  
17  
18  
19

### 20 **Strengths of this study**

- 21 • This study uses the best available data reporting system for surveillance of  
22 firearm mortality in US.
- 23 • Brings into light the overall state-specific variability of temporal trends of  
24 firearm mortality, which was obscured by the endemic national firearm  
25 fatality rates during 2000-2010 and according to race, ethnicity and intent  
26 from a seemingly stable national burden of firearm deaths.
- 27 • This is the first report that documents firearm fatality trends by ethnicity
- 28 • Our results call for identification of drivers of state-specific temporal  
29 trends to introduce tailored programs targeted to reduce deaths and  
30 injury due to firearms.  
31  
32  
33  
34

### 35 **Limitations of this study**

- 36 • Possible under reporting of firearm fatal events, which cannot be verified.
- 37 • Despite the considerable state-specific heterogeneity, the actual variation  
38 in firearm mortality may be a feature of cities and counties with varying  
39 crime rates, and we do not address the variation existing at such level.
- 40 • Finally, comparisons made between other races may not be usefully  
41 interpreted due to the heterogeneity and the small frequency of events in  
42 this sub-population.  
43  
44  
45  
46  
47  
48  
49  
50  
51  
52  
53  
54  
55  
56  
57  
58  
59  
60

1  
2  
3  
4  
5  
6  
7  
8  
9  
10  
11  
12  
13  
14  
15  
16  
17  
18  
19  
20  
21  
22  
23  
24  
25  
26  
27  
28  
29  
30  
31  
32  
33  
34  
35  
36  
37  
38  
39  
40  
41  
42  
43  
44  
45  
46  
47  
48  
49  
50  
51  
52  
53  
54  
55  
56  
57  
58  
59  
60

Firearm violence increased during the 1980s and peaked in 1993, with 39,595 firearm deaths in the US and a firearm-related fatality rate (FRF-rate) of 15.0 per 100,000.<sup>1</sup> Since the turn of the 21<sup>st</sup> century, FRF-rates in the US have become endemic around 10.3 per 100,000 accounting for 17.5% of all injury deaths,<sup>2</sup> while the intent of firearm deaths was mainly suicide and homicide.<sup>3</sup>

The FRF-rate in 1993 among blacks was three-times greater than whites, but similar among Hispanics and non-Hispanics.<sup>1 4</sup> The overall fall in FRF after 2000 corresponded to a related narrowing of the racial gap between blacks and whites, where, by 2010, the FRF-rates among blacks was twice greater than whites.<sup>1</sup> Several factors have been posited that might explain these persistent racial differences, including socioeconomic determinants and increased firearm availability.<sup>5 6</sup>

Although the national temporal trends in FRF have been previously well documented,<sup>3 7 8</sup> there is ample reason to suspect substantial heterogeneity in FRF across states, such as dramatic differences in gun laws controlling access to firearms, variability in enforcement of national standards across states,<sup>8 9</sup> changing demographics and violence.<sup>10</sup> It is likely that some of the state-to-state heterogeneity in the potential determinants of FRF may also contribute to variability in racial and ethnic differences in FRF within states.

With this in mind, this study had two distinct aims. First, we aimed to document national and state-specific trends in FRF-rates along with the annual change in FRF-rates from 2000-2010 and second, to determine the racial, ethnic and intent-specific differences in FRF-rates within each state during the same time period.

## METHODS

### Data source

We accessed the restricted fatal injury data reports from the Web-based Injury Statistics Query and Reporting System (WISQARS™), an interactive database system provided by Centers for Disease Control and Prevention's (CDC) Injury Prevention and Control Unit (<http://www.cdc.gov/injury/wisqars/>).<sup>1</sup> The data in the WISQARS system is derived from CDC annual mortality data from National Vital Statistics System (NVSS), National Center for Health Statistics (NCHS) (<http://www.cdc.gov/nchs/>) and CDC. The NCHS and the National Association of Public Health Statistics and Information Systems restricts reporting NVSS data for cumulative frequencies <10 for sub-national geographic areas to prevent unintentional disclosure of cases. International Classification of Disease-10th Revision (ICD-10) was used for coding mortality data including intent of injury.<sup>11</sup>

### Study population and variables

Our study population consisted of national and state-specific fatal firearm injuries from 2000-2010 obtained from querying the WISQARS data system. Aggregate information such as number of firearm deaths, total population and age-adjusted rates according to race (black, white, other), ethnicity (Hispanic and non-Hispanic) and intent (homicide/legal intervention, suicide, undetermined and unintentional) was obtained.

### Statistical analysis

1  
2  
3 The standard errors (SE) for national and state-specific age-adjusted FRF-  
4 rates per 100,000 persons were derived for the overall 11-year period and annually  
5 and by race, ethnicity and intent. Age-adjusted rates are obtained by direct  
6 standardization using the 2000 population. The overall 11-year rates were assessed  
7 as total firearm deaths over the total population during the 11-years. Since only  
8 aggregate data could be obtained from WISQARS without individual patient data, we  
9 used random effects meta-analysis and meta-regression.<sup>12</sup> The rates in each  
10 category and the SEs were meta-analyzed using random-effects meta-analysis.  
11 Heterogeneity between states was assessed using  $I^2$  statistic; which ranges from 0 to  
12 100% and denotes the proportion of variation across states other than by chance.<sup>13</sup>  
13  
14 <sup>14</sup> In order to assess the temporal trends from 2000-2010, we assumed linear trends  
15 across 11 years and used meta-regression to calculate the change in rates (slope)  
16 and the standard deviation (SD). The p-value from meta-regression was used to  
17 assess evidence for trend. Standardized mean difference (SMD) was calculated by  
18 dividing the annual change in age-adjusted rate by SD.<sup>15 16</sup> We do not present  
19 estimates for those states with number of deaths below 10. Lives-lost or saved are  
20 estimated by applying annual change to the total 11-year population (2000-2010).  
21 The difference between 11-year national and state-specific FRF-rates (overall and  
22 category-specific) were used to spatially represent the variation between states.  
23 STATA 13.1 (StataCorp LP, College Station, Texas; 2009) was used to analyze the  
24 data.  
25  
26  
27  
28  
29  
30  
31  
32  
33  
34  
35  
36  
37  
38  
39  
40  
41  
42  
43  
44  
45  
46  
47  
48  
49  
50  
51  
52  
53  
54  
55  
56  
57  
58  
59  
60



## RESULTS

Between 2000 and 2010, a total of 335,609 firearm-related deaths were recorded and the overall mortality rate was 10.21 per 100,000. The annual change in FRF-rate across 11-years was -0.017 with a 95% confidence interval (95% CI) of -0.044-0.010, p-trend=0.18, indicating no significant change in national FRF-rates.

**Table 1** presents national FRF-rates, for 11-years and annually according to race, ethnicity and intent. Cumulative 11-year FRF-rates were disproportionately high among blacks (18.51) as compared to whites and other race groups, and lowest among other races (3.38). Among whites the FRF-rates were lower than the overall national 11-year rate while increasing from 8.97 to 9.20 from 2000-2010. This annual increase was small (0.006, SMD=0.11) but not significant, p-trend=0.71. Even though the FRF-rates among blacks were consistently higher than national FRF-rates, the annual rates reduced from 18.30 to 16.90; and this decline, -0.114 was not significant, SMD=-0.40, p-trend=0.22. The decline in FRF-rates from 4.76 to 3.25 among other races was significant (change=-0.12, SMD=-1.83, p-trend<0.0001).

Annual reduction observed among Hispanics showed a significant reduction, -0.179, p-trend<0.0001 alongside an already low 11-year FRF-rate of 7.13. FRF-rates among non-Hispanics remained slightly above the national rates without increase. FRF-rate by intent was highest for suicides (5.80) while the annual change was minimal in all four categories with a small significant reduction for unintentional deaths (change=-0.010, SMD=-1.70, p-trend<0.0001).

1  
2  
3 State-specific 11-year FRF-rates are represented in **Figure 1** and  
4  
5  
6 **Supplementary Table 1**. Hawaii (HI) (3.02) and Massachusetts (MA) (3.24) had the  
7  
8 lowest 11-year FRF-rates, while Louisiana (LA) had the highest at 18.62. DC and 7  
9  
10 states showed a significant declining trend in FRF-rate, while MA and FL  
11  
12 documented a significant increase. District of Columbia (DC) had the largest  
13  
14 significant annual reduction at -1.067 (6.2 lives-saved per year, p-trend = 0.002)  
15  
16 though it had the highest rate of 21.71. Although MA had a low FRF-rate, a  
17  
18 significant increase was observed, change=0.074, p-trend=0.008. Florida (FL) also  
19  
20 showed an increase, change=0.160, 28.2 lives-lost per year, p-trend=0.016. FRF-  
21  
22 rates for Delaware (DL) and Ohio (OH) were 8.89 and 9.10, with a near significant  
23  
24 increasing trend, changes of 0.20 and 0.12. FRF-rate in New York (NY) was 5.15 with  
25  
26 a change=-0.064, 12.3 lives-saved per year, p-trend=0.006. Illinois (IL) had a  
27  
28 significant reduction, change=-0.155, 19.6 lives-saved per year, p-trend=0.025).  
29  
30 FRF-rates in CA was -0.166 (59.3 lives-saved per year, p-trend=0.001), Arizona (AZ)  
31  
32 at -0.230 (13.4 lives-saved per year, p-trend=0.025) and Nevada (NV) at -0.264 (6.4  
33  
34 lives-saved per year, p-trend = 0.008). Maryland (MA) and North Carolina (NC) had  
35  
36 a significant decline: change=-0.169, 9.4 lives-saved per year, p-trend=0.048 and -  
37  
38 0.174, 15.3 lives-saved per year, p-trend=0.001).  
39  
40  
41  
42  
43  
44  
45  
46  
47  
48

49 The 11-year FRF-rates for each state by race are presented in **Figures 2A to**  
50  
51 **2C** and **Supplementary Figures 1A-C**. Among whites, the lowest rate was in MA  
52  
53 with a significant increase from 2000-2010 (change=0.05, p-trend=0.037). FL also  
54  
55 recorded a significant increase (change=0.12, p-trend=0.045) but had high 11-year  
56  
57  
58  
59  
60

1  
2  
3 FRF-rate, 10.02. NV recorded the highest and unchanging FRF-rate at 16.30. The  
4  
5 four states that showed a significant declining trend from 2000-2010 were NY  
6  
7 (change=-0.05, p-trend=0.015), IL (change=-0.12, p-trend=0.028), NC (change=-  
8  
9 0.10, p-trend=0.032), and CA (change=-0.12, p-trend=0.001). Among blacks, HI had  
10  
11 the lowest 11-year FRF-rates at 2.93 while Missouri (MO) had the highest at 30.12  
12  
13 and DC was at 40.95. Oklahoma (OK), OH and DL had high 11-year rates at 20.04,  
14  
15 20.19 and 13.61 respectively with a significant increasing changes of 0.93, 0.51 and  
16  
17 0.79, p-trends of 0.008, 0.027 and 0.028 respectively. A declining trend was  
18  
19 observed among blacks in CA (change=-0.58, p-trend=0.042), AZ (change=-0.83, p-  
20  
21 trend=0.019), NV (change=-1.53, p-trend=0.005), NC (change=-0.38, p-  
22  
23 trend=0.024), Indiana (IN) (change=-0.66, p-trend=0.012), Kansas (KA) (change=-  
24  
25 1.07, p-trend=0.021), Minnesota (MN) (change=-0.61, p-trend=0.038), and DC  
26  
27 (change=-1.58, p-trend=0.017), even though their 11-year FRF-rates were high.  
28  
29 Among other races, Texas (TX) (change=-0.19, p-trend=0.033) and CA (change=-  
30  
31 0.10, p-trend=0.009) showed a significant decline.  
32  
33  
34  
35  
36  
37  
38  
39  
40  
41

42 **Figures 3A-B** and **Supplementary Figures 3A-B** presents the 11-year FRF-  
43  
44 rates for each state by ethnicity. Georgia (GA) (change=-0.54, p-trend=0.012), CA  
45  
46 (change=-0.18, p-trend=0.009), Utah (UT) (change=-0.79, p-trend=0.030), AZ  
47  
48 (change=-0.56, p-trend=0.016), and NV (change=-0.48, p-trend=0.007) were five  
49  
50 high-FRF-rate states (>7.13) while NY (change=-0.17, p-trend=0.001), IL (change=-  
51  
52 0.40, p-trend=0.001), TX (change=-0.21, p-trend=0.004), and Oregon (OR)  
53  
54 (change=-0.33, p-trend=0.037) were the four low-FRF-rate states with a significant  
55  
56  
57  
58  
59  
60

1  
2  
3 declining trend among Hispanics. No states demonstrated an increase among  
4  
5  
6 Hispanics, while non-Hispanics showed a significant increasing trend in MA  
7  
8 (change=0.07, p-trend=0.033), Pennsylvania (PA) (change=0.08, p-trend=0.039), OH  
9  
10 (change=0.13, p-trend=0.048), DL (change=0.25, p-trend=0.036), TX (change=0.14,  
11  
12 p-trend=0.022), FL (change=0.23, p-trend=0.002) and OK (change=0.15, p-  
13  
14 trend=0.045). A declining trend in non-Hispanics was observed in MD (change=-  
15  
16 0.16, p-trend=0.068), NC (change=-0.14, p-trend=0.004) and CA (change=-0.15, p-  
17  
18 trend=0.001). In TX, the FRF-rates among Hispanics (change=-0.21, p-trend=0.004)  
19  
20 demonstrated a significant decline and a significant increase among non-Hispanics  
21  
22 (change=0.14, p-trend=0.022) (**Supplementary Table 2**).  
23  
24  
25  
26  
27  
28  
29

30 FRF-rates from 2000-2010 and by intent is provided in **Figures 4A-D** and  
31  
32 **Supplementary Figures 4A-D**. Most of the northern states had low (<3.73)  
33  
34 homicide-FRF while southern states had high FRF. NY (change=-0.05, p-  
35  
36 trend=0.004), IL (change=-0.10, p-trend=0.027), NC (change=-0.10, p-trend=0.023),  
37  
38 NV (change=-0.15, p-trend=0.031) and DC (change=-1.0, p-trend=0.002) had  
39  
40 significant declining trends while MA (change=0.08, p-trend=0.001), Connecticut  
41  
42 (CT) (change=0.08, p-trend=0.023), OH (change=0.12, p-trend=0.006), DL  
43  
44 (change=0.37, p-trend<0.0001) and FL (change=0.15, p-trend=0.007) had  
45  
46 increasing homicide-FRF. A majority of the states had suicide-FRF-rates >5.80; CA  
47  
48 (change=-0.07, p-trend=0.009) and NC (change=-0.07, p-trend=0.037) had declining  
49  
50 trends. Unintentional-FRF-rates showed a significant decreasing trend in three  
51  
52  
53  
54  
55  
56  
57  
58  
59  
60

1  
2  
3 states, OH (change=-0.01, p-trend=0.022), Kentucky (KY) (change=-0.06, p-  
4 trend=0.009), and Tennessee (TN) (change=-0.05, p-trend=0.002).  
5  
6  
7  
8  
9  
10  
11  
12  
13  
14  
15  
16  
17  
18  
19  
20  
21  
22  
23  
24  
25  
26  
27  
28  
29  
30  
31  
32  
33  
34  
35  
36  
37  
38  
39  
40  
41  
42  
43  
44  
45  
46  
47  
48  
49  
50  
51  
52  
53  
54  
55  
56  
57  
58  
59  
60

For peer review only

## DISCUSSION

1  
2  
3  
4  
5  
6  
7  
8  
9  
10  
11  
12  
13  
14  
15  
16  
17  
18  
19  
20  
21  
22  
23  
24  
25  
26  
27  
28  
29  
30  
31  
32  
33  
34  
35  
36  
37  
38  
39  
40  
41  
42  
43  
44  
45  
46  
47  
48  
49  
50  
51  
52  
53  
54  
55  
56  
57  
58  
59  
60

National 11-year FRF-rate from 2000-2010 was 10.21, was almost three times higher than Switzerland and Finland.<sup>17</sup> There were four main observations that emerge from this analysis. First, while overall, blacks had higher national rates than whites and Hispanics had lower national rates than non-Hispanics, the 11-year FRF-rates declined among Hispanics and non-white non-black races with no significant change observed among whites, blacks or non-Hispanics. Second, a substantial inter-state heterogeneity was evidenced by 11-year state-specific FRF-rates being as low as 3.02 in HI to as high as 21.71 in DC. FL and MA recorded an upward FRF trend while AZ, CA, IL, MD, NV, NY, NC and DC had declining FRF-rates during the study period. Third, racial and ethnic variation was shown to drive many of the state-specific variations. Fourth, changes in different FRF-intent also drove many of the state-specific differences.

Firearm deaths increased from 28,663 in 2000 to 31,672 in 2010, about 30,509 deaths per year and no change in rate. These findings are similar to a report by the Bureau of Justice of a rapid decline in firearm homicides from 1993 to 1999 followed by a leveling of rates from 2000-2011.<sup>18</sup> It is important to bear in mind that these endemic conditions are associated with substantial, long-term cumulative health burden associated with firearm death throughout the US.<sup>19</sup> During 2000-2011 there were 306,946 firearm related deaths. With the endemic annual FRF-rate of 10.3, US-population at 338 million by 2020<sup>20</sup> and 10% decadal population

1  
2  
3 increase, we estimate 336,778 firearm related deaths to occur between 2011 and  
4  
5  
6 2020.  
7  
8  
9

10  
11 The 11-year FRF-rates we report among blacks was twice greater than that  
12  
13 of whites and six-times greater than that of other races is in line with reports  
14  
15 showing disproportionately larger firearm fatality and injury rates than whites and  
16  
17 other race.<sup>3 21 22</sup> Although there was a plateau of the national FRF-rates, rates among  
18  
19 Hispanics and non-white non-black races declined and may be explained by the lack  
20  
21 of access to firearms or low firearm ownership among Hispanics and other races.<sup>23</sup>  
22  
23 Our results explain the report where Hispanics were least likely to use firearms for  
24  
25 suicides albeit being more likely to self-injury than any other race groups.<sup>24</sup> Data  
26  
27 from 1981-2010 found that among youths a decline in homicide rates for blacks  
28  
29 between was significantly slower than the declines for Hispanics and other racial  
30  
31 and ethnic groups<sup>25</sup>, suggestive of lower crime.  
32  
33  
34  
35  
36  
37  
38  
39

40 We found 41 states with no FRF-rate change, while 7 states and DC  
41  
42 demonstrated either a significant decline or increase. MA and FL recorded a  
43  
44 significant increase, MA with smallest and FL with largest annual increase while MA  
45  
46 had the lowest 11-year FRF-rate. The Brady Center to Prevent Gun Violence<sup>9</sup>  
47  
48 firearm legislative strength score for 2013, has MA to be third with score of 65  
49  
50 among all states in restrictive firearm legislation, while FL has a score of 3. After MA  
51  
52 passed the toughest firearm-control legislation in 1998, firearm ownership rates  
53  
54 plummeted but violent crimes (476.1 to 468.9) and homicides (2.2 to 3.3) rose.<sup>26</sup>  
55  
56  
57  
58  
59  
60

1  
2  
3 The significant FRF-rate increase in MA may be explained by the influx of firearms  
4 from the two neighboring states (Maine and New Hampshire) with weak firearm  
5 control legislation.<sup>27</sup> FL is a “shall-issue”, weak legislature state with just 2 laws to  
6 prevent illegal gun-trafficking.<sup>27</sup> “Shall-issue” jurisdiction requires a license to carry  
7 a concealed firearm, where the license must be issued if the subject meets  
8 determinate criteria in the law and the issuing authority has no discretion to  
9 reject.<sup>28</sup> In contrast to the increasing FRF-rates, the aggregate violent crimes in FL  
10 declined from 801.1 to 542.9,<sup>29</sup> emphasizing a particularly concerning public health  
11 problem of increasing gun violence even in a climate of reducing violence.  
12  
13  
14  
15  
16  
17  
18  
19  
20  
21  
22  
23  
24  
25  
26

27 CA, NY, IL, AZ, NV, MD, NC, and DC had declining trends but the most marked  
28 reduction was observed in CA and may be directly linked to strength of firearm  
29 legislature, a score of 81.<sup>9</sup> CA has eight state laws to prevent illegal gun trafficking<sup>27</sup>  
30 and a reduction in homicide crime rate in CA by 25.4% from 2001-2010.<sup>30</sup> An  
31 emergency department study from 2004-2008 reporting reduction of firearm death  
32 rate in CA echoing the results of our study.<sup>31</sup> NY and IL had similar trend profiles  
33 and an overall decline in FRF-rates, but the Brady scores were 62 and 35<sup>9</sup> with 10  
34 and 8 policies preventing illegal firearm trafficking respectively.<sup>27</sup> FRF-rate  
35 reduction in AZ and NV is in contrast to CA and NY, having no laws preventing illegal  
36 gun trafficking,<sup>27</sup> with Brady scores 0 and 5 respectively.<sup>9</sup> In AZ violent crime rate  
37 dropped from 544.5 offenses in 2002 to 372.2 in 2010,<sup>32 33</sup> and NV had reductions in  
38 index crimes.<sup>34</sup> This reduction and our results may be attributed to policing  
39 strategies.<sup>35</sup> Our reported reduction in firearm death rates in DC may be attributed  
40  
41  
42  
43  
44  
45  
46  
47  
48  
49  
50  
51  
52  
53  
54  
55  
56  
57  
58  
59  
60



1  
2  
3  
4 to 9 laws preventing illegal gun trafficking.<sup>27</sup> Firearm policies are not stringent in  
5  
6 NC, strength of firearm legislature being 16<sup>9</sup> with only 5 illegal gun trafficking  
7  
8 laws.<sup>27</sup> However, the violent crime rate in NC dropped from 493 to 363 from 2000-  
9  
10 2010,<sup>36</sup> suggesting that the factors that led to reduction in crime rates may have also  
11  
12 driven FRF-rate reduction.  
13

14  
15  
16  
17  
18 We found that the state-specific increasing trend in FL was driven by an  
19  
20 increase among whites, blacks and non-Hispanics and can be explained by violent  
21  
22 crime rates in FL which ranks 4<sup>th</sup> in violent crime.<sup>37</sup> The racial gap in arrests for  
23  
24 major crimes widened in FL from 2000-2010: 6,175 blacks and 6,071 whites were  
25  
26 arrested in 2000 to 2,398 and 3,192 in 2010.<sup>38</sup> The increase in FRF-rates in MA  
27  
28 driven by whites and non-Hispanics is in contrast to the racial differences observed  
29  
30 in violent deaths with non-Hispanic blacks having the highest rate of 21.6 as  
31  
32 compared to 4.9 among whites.<sup>39</sup> MA has relatively low violent crime rate (ranks  
33  
34 20<sup>th</sup> in US),<sup>37</sup> and stringent firearm control.<sup>9</sup> Even though nationally no significant  
35  
36 reduction in FRF-rates among blacks was observed in our study, FRF-rates among  
37  
38 blacks drove the state-specific declines in AZ, NV, CA, NC and DC. Declining trends  
39  
40 among Hispanics in AZ, NV, CA, NY and IL contributing to state-specific declines may  
41  
42 be due to a combination of low firearm ownership<sup>23</sup> and racially targeted crime-  
43  
44 control activities.<sup>40</sup> In IN, KS, MN and OK, with no statewide reduction, the FRF-rates  
45  
46 fell solely among blacks, with no change among whites. These states have very few  
47  
48 laws to prevent firearm violence and trafficking<sup>27</sup> and rank among the highest  
49  
50 twenty states in crime rates except MN.<sup>37</sup>  
51  
52  
53  
54  
55  
56  
57  
58  
59  
60

1  
2  
3  
4  
5  
6 The increasing trend in FL and MA in our study was due to increase in  
7  
8 firearm homicides. According to data from CDC, rates of suicides in FL remained  
9  
10 constant from 2000-2010 while in MA these rates doubled from 1.92 to 3.15.<sup>1</sup> In  
11  
12 2010, 71% of homicides in FL were by firearms,<sup>29</sup> and in MA, 22% of the homicides  
13  
14 were by firearm.<sup>39</sup> In CA, where all racial and ethnic groups revealing declining  
15  
16 trends, was driven by reduction in suicide-FRF and is associated with the states'  
17  
18 increased effort in implementing "The Mental Health Services Act" to reduce suicide  
19  
20 rates.<sup>41</sup> In our study, reduction in homicides was caused by declines in AZ, IL, NV,  
21  
22 NY, NC and DC. These declining patterns are similar to the reduction in all-cause  
23  
24 homicide rates from 2000-2010 that occurred in a smaller magnitude among AZ, IL,  
25  
26 NY, NC and DC. These declining patterns are similar to the reduction in all-cause  
27  
28 homicide rates from 2000-2010 that occurred in a smaller magnitude among AZ, IL,  
29  
30 NV, NY, NC and in a much larger magnitude in DC.<sup>1</sup>  
31  
32  
33  
34

35 There are several limitations in our study. Under reporting of firearm fatal  
36  
37 events is a known phenomenon and a limitation of this study, which cannot be  
38  
39 verified. There is, however, no reason to suspect that blacks and Hispanics are more  
40  
41 likely than whites and non-Hispanic individuals to have a fatal firearm injury  
42  
43 misclassified on the death certificate, so this under-reporting should not have biased  
44  
45 our findings. Another limitation is that, despite the considerable state-specific  
46  
47 heterogeneity, the actual variation in firearm mortality may be a feature of cities  
48  
49 and counties with varying crime rates, and we do not address the variation existing  
50  
51 at such level. Finally, comparisons made between other races may not be usefully  
52  
53 interpreted due to the heterogeneity and the small frequency of events in this sub-  
54  
55  
56  
57  
58  
59  
60

1  
2  
3 population. However, as other race makes up about 10% of the US population, the  
4  
5 results are discussed in relation to blacks and Hispanics.  
6  
7  
8  
9

10  
11 In summary, we showed no change in national firearm mortality rates during  
12  
13 2000-2010, but showed distinct state-specific patterns with racial and ethnic  
14  
15 variation and by intent. The distinctive state-specific firearm fatality profiles vary by  
16  
17 race, ethnicity and intent adding another layer of complexity to the FRF trends. This  
18  
19 calls for specific studies to identify the drivers of the state-specific temporal trends  
20  
21 followed by introducing tailored programs that target specific racial and ethnic  
22  
23 groups in specific states.  
24  
25  
26  
27  
28  
29  
30  
31  
32  
33  
34  
35  
36  
37  
38  
39  
40  
41  
42  
43  
44  
45  
46  
47  
48  
49  
50  
51  
52  
53  
54  
55  
56  
57  
58  
59  
60

Table 1: Trends in firearm deaths in the United States, WISQARS 2000-2010.

|                             | Age-adjusted firearm deaths per 100,000 population |       |       |       |       |       |       |       |       |       |       |       | Change  |                |       |         |
|-----------------------------|----------------------------------------------------|-------|-------|-------|-------|-------|-------|-------|-------|-------|-------|-------|---------|----------------|-------|---------|
|                             | 2000                                               | 2001  | 2002  | 2003  | 2004  | 2005  | 2006  | 2007  | 2008  | 2009  | 2010  | Total | Annual  | 95% CI         | SMD   | P-trend |
| All                         | 10.14                                              | 10.31 | 10.43 | 10.29 | 9.99  | 10.27 | 10.22 | 10.24 | 10.23 | 10.05 | 10.07 | 10.21 | -0.017  | -0.044, 0.010  | -0.44 | 0.181   |
| <b>Race</b>                 |                                                    |       |       |       |       |       |       |       |       |       |       |       |         |                |       |         |
| White                       | 8.97                                               | 9.21  | 9.19  | 9.05  | 8.84  | 8.98  | 8.80  | 8.98  | 9.18  | 9.13  | 9.20  | 9.05  | 0.006   | -0.027, 0.039  | 0.11  | 0.705   |
| Black                       | 18.30                                              | 18.32 | 19.22 | 19.01 | 18.31 | 19.34 | 19.98 | 19.31 | 18.19 | 17.15 | 16.90 | 18.51 | -0.114  | -0.311, 0.082  | -0.40 | 0.220   |
| Other                       | 4.76                                               | 3.89  | 4.19  | 4.03  | 3.70  | 3.88  | 3.83  | 3.38  | 3.25  | 3.37  | 3.25  | 3.38  | -0.121  | -0.166, -0.076 | -1.83 | <0.0001 |
| <b>Ethnicity</b>            |                                                    |       |       |       |       |       |       |       |       |       |       |       |         |                |       |         |
| Hispanic                    | 7.81                                               | 7.73  | 7.63  | 7.68  | 7.42  | 7.51  | 7.19  | 7.21  | 6.60  | 6.38  | 5.86  | 7.13  | -0.179  | -0.236, -0.122 | -2.13 | <0.0001 |
| Non-Hispanic                | 10.31                                              | 10.50 | 10.67 | 10.50 | 10.23 | 10.53 | 10.54 | 10.61 | 10.74 | 10.55 | 10.71 | 10.54 | 0.027   | -0.002, 0.056  | 0.63  | 0.068   |
| <b>Intent</b>               |                                                    |       |       |       |       |       |       |       |       |       |       |       |         |                |       |         |
| Homicide/Legal Intervention | 3.88                                               | 4.05  | 4.17  | 4.19  | 4.05  | 4.28  | 4.40  | 4.32  | 4.14  | 3.89  | 3.73  | 4.10  | -0.008  | -0.054, 0.038  | -0.12 | 0.705   |
| Suicide                     | 5.90                                               | 5.90  | 5.92  | 5.77  | 5.65  | 5.66  | 5.54  | 5.63  | 5.82  | 5.91  | 6.06  | 5.80  | 0.001   | -0.035, 0.038  | 0.03  | 0.932   |
| Undetermined                | 0.08                                               | 0.08  | 0.08  | 0.08  | 0.08  | 0.07  | 0.07  | 0.09  | 0.09  | 0.07  | 0.08  | 0.08  | -0.0001 | -0.002, 0.002  | -0.02 | 0.944   |
| Unintentional               | 0.27                                               | 0.28  | 0.26  | 0.25  | 0.22  | 0.27  | 0.21  | 0.20  | 0.19  | 0.18  | 0.20  | 0.23  | -0.010  | -0.014, -0.006 | -1.70 | <0.0001 |

All values are age-adjusted rates per 100,000 persons. Change denotes annual change in rate per 100,000. Negative value indicates decline in firearm death rates per 100,000 from 2000-2010 and positive value indicates increase in firearm death rate per 100,000 from 2000-2010. CI denotes confidence intervals of the annual change in firearm death rate per 100,000. SMD indicates standardized mean difference; is equal to annual change/standard deviation. P-trend calculated using meta-regression indicates the significance of the decline or the increase in firearm related death rates from 2000-2010. Data are from Center for Disease Control and Prevention (CDC)'s National center for Injury Prevention and Control Web-based Injury Statistics Query and Reporting System (WISQARS).

**Contributorship:**

Galea and Kalesan conceived and supervised the study. Kalesan, Vasan, and Villarreal completed the analyses. Kalesan, Galea, Mobily, Hlavacek, and Villarreal led the writing. Fagan, Teperman, Mobily, Villarreal and Hlavacek assisted with the study and analyses. Fagan, Teperman, Hlavacek, Villarreal, Mobily, Vasan, Galea, and Kalesan critically revised the work. Hlavacek and Mobily assisted with obtaining state gun laws.

**Competing interests:**

None of the authors have competing interests to report

**Funding:**

There was no funding for this project

**Data sharing:**

No additional data are available

## REFERENCES

1. Centers for Disease Control and Prevention NCFIPaC. Web-based Injury Statistics Query and Reporting System (WISQARS). Atlanta, GA: National Center for Injury Prevention and Control, 2005.
2. Murphy SL, Jiaquan X, K.D. K. Deaths: Final Data for 2010. *National Vital Statistics Reports*, 2013;1-168.
3. Ikeda RM, Gorwitz R, James SP, et al. Trends in fatal firearm-related injuries, United States, 1962-1993. *American journal of preventive medicine* 1997;13(5):396-400.
4. Gotsch KE, Annest JL, Mercy JA, et al. Surveillance for Fatal and Nonfatal Firearm-Related Injuries --- United States, 1993--1998. *MMWR Surveill Summ* 2001;50:1-32.
5. Harris AR, Fisher GA, Thomas SH. Homicide as a medical outcome: racial disparity in deaths from assault in US Level I and II trauma centers. *The journal of trauma and acute care surgery* 2012;72(3):773-82.
6. Kellermann AL, Rivara FP, Rushforth NB, et al. Gun Ownership as a Risk Factor for Homicide in the Home. *New England Journal of Medicine* 1993;329(15):1084-91.
7. Firearm injury in the U.S. PA: Firearm & Injury Center at Penn, 2011.
8. Fleegler EW, Lee LK, Monuteaux MC, et al. Firearm Legislation and Firearm-Related Fatalities in the United States. *Jama Intern Med* 2013;173(9):732-40.
9. 2013 State Scorecard. In: Violence BCtPGVaLCtPG, editor. *Score Card*. Washington, DC, 2013.
10. Phillips JA. Factors associated with temporal and spatial patterns in suicide rates across U.S. states, 1976-2000. *Demography* 2013;50(2):591-614.
11. Hoyert DL, Arias E, Smith B, Murphy SL, et al. Final Data for 1999. *National vital statistics reports*. Hyattsville, Maryland: National Center for Health Statistics, 2001.
12. Egger M, Smith GD, Altman D. *Systematic Reviews in Health Care: Meta-analysis in Context*. London: BMJ Books, 2001.
13. Higgins JP, Thompson SG. Quantifying heterogeneity in a meta-analysis. *Statistics in medicine* 2002;21(11):1539-58.
14. Higgins JP, Thompson SG, Deeks JJ, et al. Measuring inconsistency in meta-analyses. *BMJ* 2003;327(7414):557-60.
15. Cohen J. A power primer. *Psychological bulletin* 1992;112(1):155-9.
16. Rosenthal R, Rubin DB. A simple, general purpose display of magnitude of experimental effect. *J Educ Psychol* 1982;74(2):166-69.
17. Bangalore S, Messerli FH. Gun Ownership and Firearm-related Deaths. *The American journal of medicine* 2013;126(10):873-6.
18. Planty M, Truman JL. Firearm Violence, 1993-2011. U.S. Department of Justice: Bureau of Justice Statistics, 2013.
19. Christoffel KK. Firearm injuries: epidemic then, endemic now. *American journal of public health* 2007;97(4):626-9.

- 1
  - 2
  - 3
  - 4
  - 5
  - 6
  - 7
  - 8
  - 9
  - 10
  - 11
  - 12
  - 13
  - 14
  - 15
  - 16
  - 17
  - 18
  - 19
  - 20
  - 21
  - 22
  - 23
  - 24
  - 25
  - 26
  - 27
  - 28
  - 29
  - 30
  - 31
  - 32
  - 33
  - 34
  - 35
  - 36
  - 37
  - 38
  - 39
  - 40
  - 41
  - 42
  - 43
  - 44
  - 45
  - 46
  - 47
  - 48
  - 49
  - 50
  - 51
  - 52
  - 53
  - 54
  - 55
  - 56
  - 57
  - 58
  - 59
  - 60
20. Nygaard DF. World population projections, 2020. *A 2020 vision for food, agriculture and the environment*. Washington DC: International Food Policy Research Institute, 1994.
21. Cherry D, Annest JL, Mercy JA, et al. Trends in nonfatal and fatal firearm-related injury rates in the United States, 1985-1995. *Annals of emergency medicine* 1998;32(1):51-9.
22. Kalesan B, French C, Fagan JA, et al. Firearm-related Hospitalizations and In-Hospital Mortality in the United States, 2000-2010. *American journal of epidemiology* 2013.
23. Schwebel DC, Lewis T, Simon TR, et al. Prevalence and Correlates of Firearm Ownership in the Homes of Fifth Graders: Birmingham, AL, Houston, TX, and Los Angeles, CA. *Health education & behavior : the official publication of the Society for Public Health Education* 2014.
24. Suicides and Self-Injury by Firearm. In: Bureau of Health Statistics and Research DoH, editor. Pennsylvania: Pennsylvania Department of Health, 2006.
25. David-Ferdon C, Dahlberg LL, Kegler SR. Homicide rates among persons aged 10-24 years - United States, 1981-2010. *MMWR. Morbidity and mortality weekly report* 2013;62(27):545-8.
26. (NIBRS) NI-BRS. National Incident-Based Reporting System (NIBRS). Commonwealth of Massachusetts, 2013.
27. Guns TT. Top Sources of Crime Guns in America, 2010.
28. Chapter 790: Weapons and Firearms. The 2009 Florida Statutes. In: Legislature TF, editor. XLVI. Florida, 2009.
29. Crime in Florida, Florida uniform crime report. In: (1992-2012). FSACF, editor. Tallahassee, FL: Florida Statistical Analysis Center: FDLE, 2013.
30. Harris KD. Homicide in California 2010. California: California Department of Justice, 2010.
31. Coyne-Beasley T, Lees AC. Fatal and nonfatal firearm injuries in North Carolina. *North Carolina medical journal* 2010;71(6):565-8.
32. Halliday RC. Crime in Arizona 2002. *An annual report compiled by Access Integrity Unit of the Arizona Department of Public Safety*. Phoenix, AZ: Arizona Department of Public Safety, 2002.
33. Halliday RC. Crime in Arizona 2010. *An annual report compiled by Access Integrity Unit of the Arizona Department of Public Safety*. Phoenix, AZ: Arizona Department of Public Safety, 2010.
34. Crime in Nevada 2010. In: Safety NDoP, editor. *Crime in Nevada: State of Nevada, Department of Public Safety*, 2012.
35. Assistance BoJ. Reducing Crime Through Intelligence-Led Policing. Washington, D.C: Office of Justice Programs, US Department of Justice, 2012:24-26.
36. Medlin L, Davis J. Scorecard on Crime and Justice in North Carolina: Criminal Justice Analysis Center, 2012.
37. Crime in the United States, 2006. Retrieved (April 14, 2014), from <http://www.fbi.gov/about-us/cjis/ucr/crime-in-the-u.s/2006>. In: United States Department of Justice FBoI, editor, 2007.
38. Part I and II Arrests for Florida by Age, Sex, and Race. *Annual Crime in Florida*. FL: Florida Department of Law Enforcement, 2012.

- 1  
2  
3 39. Violent Deaths in Massachusetts: Surveillance Update 2010: Massachusetts  
4 Department of Public Health, 2013.  
5  
6 40. J.M S. Maintaining racial inequality through crime control: mass incarceration  
7 and residential segregation. *Contemp Justice Review* 2012;15(4):469-84.  
8  
9 41. Clark W, Welch SN, Berry SH, et al. California's historic effort to reduce the  
10 stigma of mental illness: the Mental Health Services Act. *American journal of*  
11 *public health* 2013;103(5):786-94.  
12  
13  
14  
15  
16  
17  
18  
19  
20  
21  
22  
23  
24  
25  
26  
27  
28  
29  
30  
31  
32  
33  
34  
35  
36  
37  
38  
39  
40  
41  
42  
43  
44  
45  
46  
47  
48  
49  
50  
51  
52  
53  
54  
55  
56  
57  
58  
59  
60

For peer review only



## Figure legends

### Figure 1: Firearm related fatality rates from 2000-2010.

Firearm related fatality rates are 11-year cumulative age-adjusted rates per 100,000 persons from 2000 to 2010 for each of the 50 states and District of Columbia ranging from 3.02 (HI) to 21.71 (DC) per 100,000. The colors represent increasing rates from blue to red. Significant decline in 7 states (AZ, CA, IL, MD, NV, NY and NC and DC) are represented as gold stars and significant increase in FL and MA as black stars within the map and in the table.

The table summarizes the rates per 100,000, annual change in rate and p-trend for those states that show significant increase or decrease. "FRF" denotes firearm related fatality. "Change" indicates the annual change in rates from 2000 to 2010. "P-trend" indicates the significance of the decline or the increase in firearm related fatality rates from 2000 to 2010 and was calculated using meta-regression. Negative values for change indicate a decrease while positive values indicate increase in rates across the years. The intent-specific rates of firearm related fatality is denoted with arrows in the table below: downward arrow denotes reduction in rates, upward arrows indicate an increase and two-way arrows indicate no change. "ne" represents data which cannot be estimated due to frequency <10. HI (11-year=3.02, change=-0.057, p-trend=0.36) and AK (11-year=18.09, change=0.10, p-trend=0.64) are not represented in the map.

### Figure 2: Firearm related fatality rates from 2000-2010 according to race.

#### Whites:

Firearm related fatality rates are 11-year cumulative age-adjusted rates per 100,000 persons from 2000 to 2010 for each of the 50 states and District of Columbia; ranging from 2.57 (MA) to 16.30 (NV) per 100,000. The colors represent increasing rates from blue to red. White represents no data or states where the frequency was <10 among whites. Significant decline in 4 states (CA, NY, IL and NC) are represented as gold stars and significant increase in MA and FL as black stars. HI (11-year=4.29, change=0.03, p-trend=0.84) and AK (11-year=15.77, change=0.15, p-trend=0.56) are not represented in the map.

#### Blacks:

Firearm related fatality rates are 11-year cumulative age-adjusted rates per 100,000 persons from 2000 to 2010 for each of the 50 states and District of Columbia; ranging from 2.93 (HI) to 40.95 (DC) per 100,000. The colors represent increasing rates from blue to red. White represents no data or states where the frequency was <10 among blacks. Significant decline in 8 states (CA, NV, AZ, KA, MN, IN, NC and DC) are represented as gold stars and significant increase in OK, OH and DL as black stars. HI (11-year=2.93) and AK (11-year=12.36) are not represented in the map.

#### Other race:

1  
2  
3  
4  
5  
6  
7  
8  
9  
10  
11  
12  
13  
14  
15  
16  
17  
18  
19  
20  
21  
22  
23  
24  
25  
26  
27  
28  
29  
30  
31  
32  
33  
34  
35  
36  
37  
38  
39  
40  
41  
42  
43  
44  
45  
46  
47  
48  
49  
50  
51  
52  
53  
54  
55  
56  
57  
58  
59  
60

Firearm related fatality rates are 11-year cumulative age-adjusted rates per 100,000 persons from 2000 to 2010 for each of the 50 states and District of Columbia; ranging from 0.82 (NY) to 22.54 (AK) per 100,000. The colors represent increasing rates from blue to red. White represents no data or states where the frequency was <10 among other race. Significant decline in 2 states (CA and TX) are represented as gold stars and there were no states with significant increase. HI (11-year=2.18, change=-0.04, p-trend=0.50) and AK (11-year=22.54, change=-0.15, p-trend=0.75) are not represented in the map.

**Figure 3: Firearm related fatality rates from 2000-2010 according to ethnicity.**

Hispanic:

Firearm related fatality rates are 11-year cumulative age-adjusted rates per 100,000 persons from 2000 to 2010 for each of the 50 states and District of Columbia; ranging from 3.13 (NJ) to 15.63 (ND) per 100,000. The colors represent increasing rates from blue to red. White represents no data or states where the frequency was <10 among Hispanics. Significant decline in 9 states (CA, AZ, NV, OR, UT, TX, IL, GA and NY) are represented as gold stars and there were no states with significant increase. HI (11-year=3.84) and AK (11-year=8.95) are not represented in the map.

Non-Hispanic:

Firearm related fatality rates are 11-year cumulative age-adjusted rates per 100,000 persons from 2000 to 2010 for each of the 50 states and District of Columbia; ranging from 2.95 (HI) to 23.45 (DC) per 100,000. The colors represent increasing rates from blue to red. White represents no data or states where the frequency was <10 among non-Hispanics. Significant decline in 3 states (CA, NC and DC) are represented as gold stars and significant increase in 7 states (TX, OK, FL, OH, PA, DL, and MA) as black stars. HI (11-year=2.95, change=-0.05, p-trend=0.50) and AK (11-year=18.44, change=0.13, p-trend=0.57) are not represented in the map.

**Figure 4: Firearm related fatality rates from 2000-2010 according to intent.**

Homicide:

Firearm related fatality rates are 11-year cumulative age-adjusted rates per 100,000 persons from 2000 to 2010 for each of the 50 states and District of Columbia; ranging from 0.65 (NH) to 19.75 (DC) per 100,000. The colors represent increasing rates from blue to red. White represents no data or states where the frequency was <10. Significant decline in 5 states (NV, IL, NC, NY and DC) are represented as gold stars and significant increase in MO, FL, OH, MA, CT, and DL as black stars. HI (11-year=0.79, change=-0.01, p-trend=0.68) and AK (11-year=3.54, change=0.001, p-trend=0.95) are not represented in the map.

Suicide:

Firearm related fatality rates are 11-year cumulative age-adjusted rates per 100,000 persons from 2000 to 2010 for each of the 50 states and District of Columbia; ranging from 1.61 (MA) to 13.79 (AK) per 100,000. The colors represent increasing

1  
2  
3 rates from blue to red. White represents no data or states where the frequency was  
4 <10. Significant decline in 2 states (CA and NC) are represented as gold stars and  
5 there were no states with significant increase. HI (11-year=2.10, change=-0.001, p-  
6 trend=0.95) and AK (11-year=13.79, change=0.11, p-trend=0.61) are not  
7 represented in the map.  
8  
9

10  
11 Undetermined:

12 Firearm related fatality rates are 11-year cumulative age-adjusted rates per 100,000  
13 persons from 2000 to 2010 for each of the 50 states and District of Columbia;  
14 ranging from 0.01 (NJ) to 0.47 (AK) per 100,000. The colors represent increasing  
15 rates from blue to red. White represents no data or states where the frequency was  
16 <10. There was no significant decline or increasing state-specific trends. HI (11-  
17 year=ne) and AK (11-year=0.47) are not represented in the map.  
18  
19

20  
21 Unintentional:

22 Firearm related fatality rates are 11-year cumulative age-adjusted rates per 100,000  
23 persons from 2000 to 2010 for each of the 50 states and District of Columbia;  
24 ranging from 0.04 (MA) to 0.83 (LO) per 100,000. The colors represent increasing  
25 rates from blue to red. White represents no data or states where the frequency was  
26 <10. Significant decline in 3 states (OH, KN and TN) are represented as gold stars  
27 and there were no states with significant increase. HI (11-year=0.08) and AK (11-  
28 year=0.29) are not represented in the map.  
29  
30  
31  
32  
33  
34  
35  
36  
37  
38  
39  
40  
41  
42  
43  
44  
45  
46  
47  
48  
49  
50  
51  
52  
53  
54  
55  
56  
57  
58  
59  
60

1  
2  
3  
4  
5  
6  
7  
8  
9  
10  
11  
12  
13  
14  
15  
16  
17  
18  
19  
20  
21  
22  
23  
24  
25  
26  
27  
28  
29  
30  
31  
32  
33  
34  
35  
36  
37  
38  
39  
40  
41  
42  
43  
44  
45  
46  
47  
48  
49  
50  
51  
52  
53  
54  
55  
56  
57  
58  
59  
60

For peer review only

1  
2  
3 | July ~~1102~~, 2014  
4  
5  
6

7 **Title: State-specific, racial and ethnic heterogeneity in trends of firearm-**  
8 **related fatality rates in the United States from 2000-2010**  
9

10 Corresponding author:

11 Bindu Kalesan  
12 Department of Surgery & Epidemiology,  
13 Columbia University,  
14 650 W 168<sup>th</sup> Street Room 210  
15 New York, NY, USA  
16 Email: [kb2693@cumc.columbia.edu](mailto:kb2693@cumc.columbia.edu)  
17 Tel: 212-305-8880  
18  
19

20  
21 Co-authors:

22 Sowmya Vasam  
23 Department of Surgery,  
24 Columbia University,  
25 New York, NY, USA  
26 Email: [sv2436@cumc.columbia.edu](mailto:sv2436@cumc.columbia.edu)  
27  
28

29  
30 Matthew E Mobily  
31 Department of Epidemiology,  
32 Columbia University,  
33 New York, NY, USA  
34 Email: [mem2292@columbia.edu](mailto:mem2292@columbia.edu)  
35  
36

37 Marcos D Villarreal  
38 Department of Epidemiology,  
39 Columbia University,  
40 New York, NY, USA  
41 Email: [mdv2119@columbia.edu](mailto:mdv2119@columbia.edu)  
42  
43

44 Patrick Hlavacek  
45 Department of Epidemiology,  
46 Columbia University,  
47 New York, NY, USA  
48 Email: [ph2394@columbia.edu](mailto:ph2394@columbia.edu)  
49  
50

51 Sheldon Teperman  
52 Trauma and Critical Care Services,  
53 Jacobi Medical Center  
54 Bronx, NY, USA  
55 Email: [Sheldon.Teperman@nbhn.net](mailto:Sheldon.Teperman@nbhn.net)  
56  
57  
58  
59  
60

1  
2  
3 Jeffrey A Fagan  
4 Department of Law & Epidemiology,  
5 Columbia University,  
6 New York, NY, USA  
7 Email: [jfagan@law.columbia.edu](mailto:jfagan@law.columbia.edu)  
8  
9

10 Sandro Galea  
11 Department of Epidemiology,  
12 Columbia University,  
13 New York, NY, USA  
14 Email: [sgalea@cumc.columbia.edu](mailto:sgalea@cumc.columbia.edu)  
15  
16

17  
18  
19  
20  
21  
22  
23 Keywords: firearms, temporal trends, mortality  
24

25 Word count: 2964  
26  
27  
28  
29  
30  
31  
32  
33  
34  
35  
36  
37  
38  
39  
40  
41  
42  
43  
44  
45  
46  
47  
48  
49  
50  
51  
52  
53  
54  
55  
56  
57  
58  
59  
60

**Abstract:**

**Objectives:** To document overall, racial, ethnic and intent-specific spatio-temporal trends of firearm related fatality rates (FRF-rate) in the United States.

**Design:** Cross-sectional study per year from 2000 to 2010.

**Setting:** United States.

**Participants:** Aggregate count of all people in the US from 2000 to 2010.

**Outcome measures:** Data from the Web-based Injury Statistics Query and Reporting System from 2000-2010 was used to determine annual FRF-rates per 100,000 and by states, race, ethnicity and intent.

**Results:** The average national 11-year FRF-rate was 10.21 per 100,000, from 3.02 to 18.62 in Louisiana: 60% of states had higher than national rates and 41 states showed no temporal change. The average national FRF-rates among blacks and whites were 18.51 and 9.05 per 100,000 and among Hispanics and non-Hispanics were 7.13 and 10.13 per 100,000; Hispanics had a decreasing change of -0.18,  $p$ -trend<0.0001. In states with increasing trends (Florida and Massachusetts), whites and non-Hispanics drove the rise; while in states with decreasing trends (California, North Carolina, Arizona, Nevada, New York, Illinois, Maryland), Hispanics and blacks drove the fall. The average national FRF-rates due to homicides (4.1 per 100,000) and suicides (5.8 per 100,000) remained constant, but varied between states.

**Conclusion:** Endemic national FRF-rates mask a wide variation in time trends between states. FRF-rates were twice as high in blacks than whites but decreased

1  
2  
3 among Hispanics. Efforts to identify state-specific best practices can contribute to  
4  
5 changes in national FRF-rates that remain high.  
6  
7  
8  
9  
10  
11  
12  
13  
14  
15  
16  
17  
18  
19

### 20 **Strengths of this study**

- 21 • This study uses the best available data reporting system for surveillance of  
22 firearm mortality in US.
- 23 • Brings into light the overall state-specific variability of temporal trends of  
24 firearm mortality, which was obscured by the endemic national firearm  
25 fatality rates during 2000-2010 and according to race, ethnicity and intent  
26 from a seemingly stable national burden of firearm deaths.
- 27 • This is the first report that documents firearm fatality trends by ethnicity
- 28 • Our results call for identification of drivers of state-specific temporal  
29 trends to introduce tailored programs targeted to reduce deaths and  
30 injury due to firearms.  
31  
32  
33  
34

### 35 **Limitations of this study**

- 36 • Possible under reporting of firearm fatal events, which cannot be verified.
- 37 • Despite the considerable state-specific heterogeneity, the actual variation  
38 in firearm mortality may be a feature of cities and counties with varying  
39 crime rates, and we do not address the variation existing at such level.
- 40 • Finally, comparisons made between other races may not be usefully  
41 interpreted due to the heterogeneity and the small frequency of events in  
42 this sub-population.  
43  
44  
45  
46  
47  
48  
49  
50  
51  
52  
53  
54  
55  
56  
57  
58  
59  
60



1  
2  
3  
4  
5  
6  
7  
8  
9  
10  
11  
12  
13  
14  
15  
16  
17  
18  
19  
20  
21  
22  
23  
24  
25  
26  
27  
28  
29  
30  
31  
32  
33  
34  
35  
36  
37  
38  
39  
40  
41  
42  
43  
44  
45  
46  
47  
48  
49  
50  
51  
52  
53  
54  
55  
56  
57  
58  
59  
60

Firearm violence increased during the 1980s and peaked in 1993, with 39,595 firearm deaths in the US and a firearm-related fatality rate (FRF-rate) of 15.0 per 100,000.<sup>1</sup> Since the turn of the 21<sup>st</sup> century, FRF-rates in the US have become endemic around 10.3 per 100,000 accounting for 17.5% of all injury deaths,<sup>2</sup> while the intent of firearm deaths was mainly suicide and homicide.<sup>3</sup>

The FRF-rate in 1993 among blacks was three-times greater than whites, but similar among Hispanics and non-Hispanics.<sup>1 4</sup> The overall fall in FRF after 2000 corresponded to a related narrowing of the racial gap between blacks and whites, where, by 2010, the FRF-rates among blacks was twice greater than whites.<sup>1</sup> Several factors have been posited that might explain these persistent racial differences, including socioeconomic determinants and increased firearm availability.<sup>5 6</sup>

Although the national temporal trends in FRF have been previously well documented,<sup>3 7 8</sup> there is ample reason to suspect substantial heterogeneity in FRF across states, such as dramatic differences in gun laws controlling access to firearms, variability in enforcement of national standards across states,<sup>8 9</sup> changing demographics and violence.<sup>10</sup> It is likely that some of the state-to-state heterogeneity in the potential determinants of FRF may also contribute to variability in racial and ethnic differences in FRF within states.

With this in mind, this study had two distinct aims. First, we aimed to document national and state-specific trends in FRF-rates along with the annual change in FRF-rates from 2000-2010 and second, to determine the racial, ethnic and

1  
2  
3  
4  
5  
6  
7  
8  
9  
10  
11  
12  
13  
14  
15  
16  
17  
18  
19  
20  
21  
22  
23  
24  
25  
26  
27  
28  
29  
30  
31  
32  
33  
34  
35  
36  
37  
38  
39  
40  
41  
42  
43  
44  
45  
46  
47  
48  
49  
50  
51  
52  
53  
54  
55  
56  
57  
58  
59  
60

intent-specific differences in FRF-rates within each state during the same time period.

For peer review only

## METHODS

### Data source

We accessed the restricted fatal injury data reports from the Web-based Injury Statistics Query and Reporting System (WISQARS™), an interactive database system provided by Centers for Disease Control and Prevention's (CDC) Injury Prevention and Control Unit (<http://www.cdc.gov/injury/wisqars/>).<sup>1</sup> The data in the WISQARS system is derived from CDC annual mortality data from National Vital Statistics System (NVSS), National Center for Health Statistics (NCHS) (<http://www.cdc.gov/nchs/>) and CDC. The NCHS and the National Association of Public Health Statistics and Information Systems restricts reporting NVSS data for cumulative frequencies <10 for sub-national geographic areas to prevent unintentional disclosure of cases. International Classification of Disease-10th Revision (ICD-10) was used for coding mortality data including intent of injury.<sup>11</sup>

### Study population and variables

Our study population consisted of national and state-specific fatal firearm injuries from 2000-2010 obtained from querying the WISQARS data system. Aggregate information such as number of firearm deaths, total population and age-adjusted rates according to race (black, white, other), ethnicity (Hispanic and non-Hispanic) and intent (homicide/legal intervention, suicide, undetermined and unintentional) was obtained.

### Statistical analysis

1  
2  
3 The standard errors (SE) for national and state-specific age-adjusted FRF-  
4 rates per 100,000 persons were derived for the overall 11-year period and annually  
5 and by race, ethnicity and intent. Age-adjusted rates are obtained by direct  
6 standardization using the 2000 population. The overall 11-year rates were assessed  
7 as total firearm deaths over the total population during the 11-years. Since only  
8 aggregate data could be obtained from WISQARS without individual patient data, we  
9 used random effects meta-analysis and meta-regression.<sup>12</sup> The rates in each  
10 category and the SEs were meta-analyzed using random-effects meta-analysis.  
11 Heterogeneity between states was assessed using  $I^2$  statistic; which ranges from 0 to  
12 100% and denotes the proportion of variation across states other than by chance.<sup>13</sup>  
13  
14 <sup>14</sup> In order to assess the temporal trends from 2000-2010, we assumed linear trends  
15 across 11 years and used meta-regression to calculate the change in rates (slope)  
16 and the standard deviation (SD). The p-value from meta-regression was used to  
17 assess evidence for trend. Standardized mean difference (SMD) was calculated by  
18 dividing the annual change in age-adjusted rate by SD.<sup>15 16</sup> We do not present  
19 estimates for those states with number of deaths below 10. Lives-lost or saved are  
20 estimated by applying annual change to the total 11-year population (2000-2010).  
21 The difference between 11-year national and state-specific FRF-rates (overall and  
22 category-specific) were used to spatially represent the variation between states.  
23 STATA 13.1 (StataCorp LP, College Station, Texas; 2009) was used to analyze the  
24 data.  
25  
26  
27  
28  
29  
30  
31  
32  
33  
34  
35  
36  
37  
38  
39  
40  
41  
42  
43  
44  
45  
46  
47  
48  
49  
50  
51  
52  
53  
54  
55  
56  
57  
58  
59  
60

## RESULTS

Between 2000 and 2010, a total of 335,609 firearm-related deaths were recorded and the overall mortality rate was 10.21 per 100,000. The annual change in FRF-rate across 11-years was -0.017 with a 95% confidence interval (95% CI) of -0.044-0.010, p-trend=0.18, indicating no significant change in national FRF-rates.

**Table 1** presents national FRF-rates, for 11-years and annually according to race, ethnicity and intent. Cumulative 11-year FRF-rates were disproportionately high among blacks (18.51) as compared to whites and other race groups, and lowest among other races (3.38). Among whites the FRF-rates were lower than the overall national 11-year rate while increasing from 8.97 to 9.20 from 2000-2010. This annual increase was small (0.006, SMD=0.11) but not significant, p-trend=0.71. Even though the FRF-rates among blacks were consistently higher than national FRF-rates, the annual rates reduced from 18.30 to 16.90; and this decline, -0.114 was not significant, SMD=-0.40, p-trend=0.22. The decline in FRF-rates from 4.76 to 3.25 among other races was significant (change=-0.12, SMD=-1.83, p-trend<0.0001). Annual reduction observed among Hispanics showed a significant reduction, -0.179, p-trend<0.0001 alongside an already low 11-year FRF-rate of 7.13. FRF-rates among non-Hispanics remained slightly above the national rates without increase. FRF-rate by intent was highest for suicides (5.80) while the annual change was minimal in all four categories with a small significant reduction for unintentional deaths (change=-0.010, SMD=-1.70, p-trend<0.0001).

1  
2  
3  
4  
5  
6  
7  
8  
9  
10  
11  
12  
13  
14  
15  
16  
17  
18  
19  
20  
21  
22  
23  
24  
25  
26  
27  
28  
29  
30  
31  
32  
33  
34  
35  
36  
37  
38  
39  
40  
41  
42  
43  
44  
45  
46  
47  
48  
49  
50  
51  
52  
53  
54  
55  
56  
57  
58  
59  
60

State-specific 11-year FRF-rates are represented in **Figure 1** and **Supplementary Table 1**. Hawaii (HI) (3.02) and Massachusetts (MA) (3.24) had the lowest 11-year FRF-rates, while Louisiana (LA) had the highest at 18.62. DC and 7 states showed a significant declining trend in FRF-rate, while MA and FL documented a significant increase. District of Columbia (DC) had the largest significant annual reduction at -1.067 (6.2 lives-saved per year, p-trend = 0.002) though it had the highest rate of 21.71. Although MA had a low FRF-rate, a significant increase was observed, change=0.074, p-trend=0.008. Florida (FL) also showed an increase, change=0.160, 28.2 lives-lost per year, p-trend=0.016. FRF-rates for Delaware (DL) and Ohio (OH) were 8.89 and 9.10, with a near significant increasing trend, changes of 0.20 and 0.12. FRF-rate in New York (NY) was 5.15 with a change=-0.064, 12.3 lives-saved per year, p-trend=0.006. Illinois (IL) had a significant reduction, change=-0.155, 19.6 lives-saved per year, p-trend=0.025). FRF-rates in CA was -0.166 (59.3 lives-saved per year, p-trend=0.001), Arizona (AZ) at -0.230 (13.4 lives-saved per year, p-trend=0.025) and Nevada (NV) at -0.264 (6.4 lives-saved per year, p-trend = 0.008). Maryland (MA) and North Carolina (NC) had a significant decline: change=-0.169, 9.4 lives-saved per year, p-trend=0.048 and -0.174, 15.3 lives-saved per year, p-trend=0.001).

The 11-year FRF-rates for each state by race are presented in **Figures 2A to 2C** and **Supplementary Figures 1A-C**. Among whites, the lowest rate was in MA with a significant increase from 2000-2010 (change=0.05, p-trend=0.037). FL also recorded a significant increase (change=0.12, p-trend=0.045) but had high 11-year

1  
2  
3 FRF-rate, 10.02. NV recorded the highest and unchanging FRF-rate at 16.30. The  
4  
5  
6 four states that showed a significant declining trend from 2000-2010 were NY  
7  
8 (change=-0.05, p-trend=0.015), IL (change=-0.12, p-trend=0.028), NC (change=-  
9  
10 0.10, p-trend=0.032), and CA (change=-0.12, p-trend=0.001). Among blacks, HI had  
11  
12 the lowest 11-year FRF-rates at 2.93 while Missouri (MO) had the highest at 30.12  
13  
14 and DC was at 40.95. Oklahoma (OK), OH and DL had high 11-year rates at 20.04,  
15  
16 20.19 and 13.61 respectively with a significant increasing changes of 0.93, 0.51 and  
17  
18 0.79, p-trends of 0.008, 0.027 and 0.028 respectively. A declining trend was  
19  
20 observed among blacks in CA (change=-0.58, p-trend=0.042), AZ (change=-0.83, p-  
21  
22 trend=0.019), NV (change=-1.53, p-trend=0.005), NC (change=-0.38, p-  
23  
24 trend=0.024), Indiana (IN) (change=-0.66, p-trend=0.012), Kansas (KA) (change=-  
25  
26 1.07, p-trend=0.021), Minnesota (MN) (change=-0.61, p-trend=0.038), and DC  
27  
28 (change=-1.58, p-trend=0.017), even though their 11-year FRF-rates were high.  
29  
30 Among other races, Texas (TX) (change=-0.19, p-trend=0.033) and CA (change=-  
31  
32 0.10, p-trend=0.009) showed a significant decline.  
33  
34  
35  
36  
37  
38  
39  
40  
41

42 **Figures 3A-B** and **Supplementary Figures 3A-B** presents the 11-year FRF-  
43  
44 rates for each state by ethnicity. Georgia (GA) (change=-0.54, p-trend=0.012), CA  
45  
46 (change=-0.18, p-trend=0.009), Utah (UT) (change=-0.79, p-trend=0.030), AZ  
47  
48 (change=-0.56, p-trend=0.016), and NV (change=-0.48, p-trend=0.007) were five  
49  
50 high-FRF-rate states (>7.13) while NY (change=-0.17, p-trend=0.001), IL (change=-  
51  
52 0.40, p-trend=0.001), TX (change=-0.21, p-trend=0.004), and Oregon (OR)  
53  
54 (change=-0.33, p-trend=0.037) were the four low-FRF-rate states with a significant  
55  
56  
57  
58  
59  
60

1  
2  
3 declining trend among Hispanics. No states demonstrated an increase among  
4  
5  
6 Hispanics, while non-Hispanics showed a significant increasing trend in MA  
7  
8 (change=0.07, p-trend=0.033), Pennsylvania (PA) (change=0.08, p-trend=0.039), OH  
9  
10 (change=0.13, p-trend=0.048), DL (change=0.25, p-trend=0.036), TX (change=0.14,  
11  
12 p-trend=0.022), FL (change=0.23, p-trend=0.002) and OK (change=0.15, p-  
13  
14 trend=0.045). A declining trend in non-Hispanics was observed in MD (change=-  
15  
16 0.16, p-trend=0.068), NC (change=-0.14, p-trend=0.004) and CA (change=-0.15, p-  
17  
18 trend=0.001). In TX, the FRF-rates among Hispanics (change=-0.21, p-trend=0.004)  
19  
20 demonstrated a significant decline and a significant increase among non-Hispanics  
21  
22 (change=0.14, p-trend=0.022) (**Supplementary Table 2**).

23  
24  
25  
26  
27  
28  
29  
30 FRF-rates from 2000-2010 and by intent is provided in **Figures 4A-D** and  
31  
32 **Supplementary Figures 4A-D**. Most of the northern states had low (<3.73)  
33  
34 homicide-FRF while southern states had high FRF. NY (change=-0.05, p-  
35  
36 trend=0.004), IL (change=-0.10, p-trend=0.027), NC (change=-0.10, p-trend=0.023),  
37  
38 NV (change=-0.15, p-trend=0.031) and DC (change=-1.0, p-trend=0.002) had  
39  
40 significant declining trends while MA (change=0.08, p-trend=0.001), Connecticut  
41  
42 (CT) (change=0.08, p-trend=0.023), OH (change=0.12, p-trend=0.006), DL  
43  
44 (change=0.37, p-trend<0.0001) and FL (change=0.15, p-trend=0.007) had  
45  
46 increasing homicide-FRF. A majority of the states had suicide-FRF-rates >5.80; CA  
47  
48 (change=-0.07, p-trend=0.009) and NC (change=-0.07, p-trend=0.037) had declining  
49  
50 trends. Unintentional-FRF-rates showed a significant decreasing trend in three  
51  
52  
53  
54  
55  
56  
57  
58  
59  
60



1  
2  
3 states, OH (change=-0.01, p-trend=0.022), Kentucky (KY) (change=-0.06, p-  
4 trend=0.009), and Tennessee (TN) (change=-0.05, p-trend=0.002).  
5  
6  
7  
8  
9  
10  
11  
12  
13  
14  
15  
16  
17  
18  
19  
20  
21  
22  
23  
24  
25  
26  
27  
28  
29  
30  
31  
32  
33  
34  
35  
36  
37  
38  
39  
40  
41  
42  
43  
44  
45  
46  
47  
48  
49  
50  
51  
52  
53  
54  
55  
56  
57  
58  
59  
60

For peer review only

## DISCUSSION

1  
2  
3  
4  
5  
6  
7  
8  
9  
10  
11  
12  
13  
14  
15  
16  
17  
18  
19  
20  
21  
22  
23  
24  
25  
26  
27  
28  
29  
30  
31  
32  
33  
34  
35  
36  
37  
38  
39  
40  
41  
42  
43  
44  
45  
46  
47  
48  
49  
50  
51  
52  
53  
54  
55  
56  
57  
58  
59  
60

National 11-year FRF-rate from 2000-2010 was 10.21, was almost three times higher than Switzerland and Finland.<sup>17</sup> There were four main observations that emerge from this analysis. First, while overall, blacks had higher national rates than whites and Hispanics had lower national rates than non-Hispanics, the 11-year FRF-rates declined among Hispanics and non-white non-black races with no significant change observed among whites, blacks or non-Hispanics. Second, a substantial inter-state heterogeneity was evidenced by 11-year state-specific FRF-rates being as low as 3.02 in HI to as high as 21.71 in DC. FL and MA recorded an upward FRF trend while AZ, CA, IL, MD, NV, NY, NC and DC had declining FRF-rates during the study period. Third, racial and ethnic variation was shown to drive many of the state-specific variations. Fourth, changes in different FRF-intent also drove many of the state-specific differences.

Firearm deaths increased from 28,663 in 2000 to 31,672 in 2010, about 30,509 deaths per year and no change in rate. These findings are similar to a report by the Bureau of Justice of a rapid decline in firearm homicides from 1993 to 1999 followed by a leveling of rates from 2000-2011.<sup>18</sup> It is important to bear in mind that these endemic conditions are associated with substantial, long-term cumulative health burden associated with firearm death throughout the US.<sup>19</sup> During 2000-2011 there were 306,946 firearm related deaths. With the endemic annual FRF-rate of 10.3, US-population at 338 million by 2020<sup>20</sup> and 10% decadal population

1  
2  
3 increase, we estimate 336,778 firearm related deaths to occur between 2011 and  
4  
5  
6 2020.  
7  
8  
9

10  
11 The 11-year FRF-rates we report among blacks was twice greater than that  
12  
13 of whites and six-times greater than that of other races is in line with reports  
14  
15 showing disproportionately larger firearm fatality and injury rates than whites and  
16  
17 other race.<sup>3 21 22</sup> Although there was a plateau of the national FRF-rates, rates among  
18  
19 Hispanics and non-white non-black races declined and may be explained by the lack  
20  
21 of access to firearms or low firearm ownership among Hispanics and other races.<sup>23</sup>  
22  
23 Our results explain the report where Hispanics were least likely to use firearms for  
24  
25 suicides albeit being more likely to self-injury than any other race groups.<sup>24</sup> Data  
26  
27 from 1981-2010 found that among youths a decline in homicide rates for blacks  
28  
29 between was significantly slower than the declines for Hispanics and other racial  
30  
31 and ethnic groups<sup>25</sup>, suggestive of lower crime.  
32  
33  
34  
35  
36  
37  
38  
39

40  
41 We found 41 states with no FRF-rate change, while 7 states and DC  
42  
43 demonstrated either a significant decline or increase. MA and FL recorded a  
44  
45 significant increase, MA with smallest and FL with largest annual increase while MA  
46  
47 had the lowest 11-year FRF-rate. The Brady Center to Prevent Gun Violence<sup>9</sup>  
48  
49 firearm legislative strength score for 2013, has MA to be third with score of 65  
50  
51 among all states in restrictive firearm legislation, while FL has a score of 3. After MA  
52  
53 passed the toughest firearm-control legislation in 1998, firearm ownership rates  
54  
55 plummeted but violent crimes (476.1 to 468.9) and homicides (2.2 to 3.3) rose.<sup>26</sup>  
56  
57  
58  
59  
60

1  
2  
3 The significant FRF-rate increase in MA may be explained by the influx of firearms  
4 from the two neighboring states (Maine and New Hampshire) with weak firearm  
5 control legislation.<sup>27</sup> FL is a “shall-issue”, weak legislature state with just 2 laws to  
6 prevent illegal gun-trafficking.<sup>27</sup> “Shall-issue” jurisdiction requires a license to carry  
7 a concealed firearm, where the license must be issued if the subject meets  
8 determinate criteria in the law and the issuing authority has no discretion to  
9 reject.<sup>28</sup> In contrast to the increasing FRF-rates, the aggregate violent crimes in FL  
10 declined from 801.1 to 542.9,<sup>29</sup> emphasizing a particularly concerning public health  
11 problem of increasing gun violence even in a climate of reducing violence.  
12  
13  
14  
15  
16  
17  
18  
19  
20  
21  
22  
23  
24  
25  
26

27 CA, NY, IL, AZ, NV, MD, NC, and DC had declining trends but the most marked  
28 reduction was observed in CA and may be directly linked to strength of firearm  
29 legislature, a score of 81.<sup>9</sup> CA has eight state laws to prevent illegal gun trafficking<sup>27</sup>  
30 and a reduction in homicide crime rate in CA by 25.4% from 2001-2010.<sup>30</sup> An  
31 emergency department study from 2004-2008 reporting reduction of firearm death  
32 rate in CA echoing the results of our study.<sup>31</sup> NY and IL had similar trend profiles  
33 and an overall decline in FRF-rates, but the Brady scores were 62 and 35<sup>9</sup> with 10  
34 and 8 policies preventing illegal firearm trafficking respectively.<sup>27</sup> FRF-rate  
35 reduction in AZ and NV is in contrast to CA and NY, having no laws preventing illegal  
36 gun trafficking,<sup>27</sup> with Brady scores 0 and 5 respectively.<sup>9</sup> In AZ violent crime rate  
37 dropped from 544.5 offenses in 2002 to 372.2 in 2010,<sup>32 33</sup> and NV had reductions in  
38 index crimes.<sup>34</sup> This reduction and our results may be attributed to policing  
39 strategies.<sup>35</sup> Our reported reduction in firearm death rates in DC may be attributed  
40  
41  
42  
43  
44  
45  
46  
47  
48  
49  
50  
51  
52  
53  
54  
55  
56  
57  
58  
59  
60

1  
2  
3  
4 to 9 laws preventing illegal gun trafficking.<sup>27</sup> Firearm policies are not stringent in  
5  
6 NC, strength of firearm legislature being 16<sup>9</sup> with only 5 illegal gun trafficking  
7  
8 laws.<sup>27</sup> However, the violent crime rate in NC dropped from 493 to 363 from 2000-  
9  
10 2010,<sup>36</sup> suggesting that the factors that led to reduction in crime rates may have also  
11  
12 driven FRF-rate reduction.  
13

14  
15  
16  
17  
18 We found that the state-specific increasing trend in FL was driven by an  
19  
20 increase among whites, blacks and non-Hispanics and can be explained by violent  
21  
22 crime rates in FL which ranks 4<sup>th</sup> in violent crime.<sup>37</sup> The racial gap in arrests for  
23  
24 major crimes widened in FL from 2000-2010: 6,175 blacks and 6,071 whites were  
25  
26 arrested in 2000 to 2,398 and 3,192 in 2010.<sup>38</sup> The increase in FRF-rates in MA  
27  
28 driven by whites and non-Hispanics is in contrast to the racial differences observed  
29  
30 in violent deaths with non-Hispanic blacks having the highest rate of 21.6 as  
31  
32 compared to 4.9 among whites.<sup>39</sup> MA has relatively low violent crime rate (ranks  
33  
34 20<sup>th</sup> in US),<sup>37</sup> and stringent firearm control.<sup>9</sup> Even though nationally no significant  
35  
36 reduction in FRF-rates among blacks was observed in our study, FRF-rates among  
37  
38 blacks drove the state-specific declines in AZ, NV, CA, NC and DC. Declining trends  
39  
40 among Hispanics in AZ, NV, CA, NY and IL contributing to state-specific declines may  
41  
42 be due to a combination of low firearm ownership<sup>23</sup> and racially targeted crime-  
43  
44 control activities.<sup>40</sup> In IN, KS, MN and OK, with no statewide reduction, the FRF-rates  
45  
46 fell solely among blacks, with no change among whites. These states have very few  
47  
48 laws to prevent firearm violence and trafficking<sup>27</sup> and rank among the highest  
49  
50 twenty states in crime rates except MN.<sup>37</sup>  
51  
52  
53  
54  
55  
56  
57  
58  
59  
60

1  
2  
3  
4  
5  
6 The increasing trend in FL and MA in our study was due to increase in  
7  
8 firearm homicides. According to data from CDC, rates of suicides in FL remained  
9  
10 constant from 2000-2010 while in MA these rates doubled from 1.92 to 3.15.<sup>1</sup> In  
11  
12 2010, 71% of homicides in FL were by firearms,<sup>29</sup> and in MA, 22% of the homicides  
13  
14 were by firearm.<sup>39</sup> In CA, where all racial and ethnic groups revealing declining  
15  
16 trends, was driven by reduction in suicide-FRF and is associated with the states'  
17  
18 increased effort in implementing "The Mental Health Services Act" to reduce suicide  
19  
20 rates.<sup>41</sup> In our study, reduction in homicides was caused by declines in AZ, IL, NV,  
21  
22 NY, NC and DC. These declining patterns are similar to the reduction in all-cause  
23  
24 homicide rates from 2000-2010 that occurred in a smaller magnitude among AZ, IL,  
25  
26 NY, NC and DC. These declining patterns are similar to the reduction in all-cause  
27  
28 homicide rates from 2000-2010 that occurred in a smaller magnitude among AZ, IL,  
29  
30 NV, NY, NC and in a much larger magnitude in DC.<sup>1</sup>  
31  
32  
33  
34

35 There are several limitations in our study. Under reporting of firearm fatal  
36  
37 events is a known phenomenon and a limitation of this study, which cannot be  
38  
39 verified. There is, however, no reason to suspect that blacks and Hispanics are more  
40  
41 likely than whites and non-Hispanic individuals to have a fatal firearm injury  
42  
43 misclassified on the death certificate, so this under-reporting should not have biased  
44  
45 our findings. Another limitation is that, despite the considerable state-specific  
46  
47 heterogeneity, the actual variation in firearm mortality may be a feature of cities  
48  
49 and counties with varying crime rates, and we do not address the variation existing  
50  
51 at such level. Finally, comparisons made between other races may not be usefully  
52  
53 interpreted due to the heterogeneity and the small frequency of events in this sub-  
54  
55  
56  
57  
58  
59  
60

1  
2  
3 population. However, as other race makes up about 10% of the US population, the  
4  
5 results are discussed in relation to blacks and Hispanics.  
6  
7  
8  
9

10  
11 In summary, we showed no change in national firearm mortality rates during  
12  
13 2000-2010, but showed distinct state-specific patterns with racial and ethnic  
14  
15 variation and by intent. The distinctive state-specific firearm fatality profiles vary by  
16  
17 race, ethnicity and intent adding another layer of complexity to the FRF trends. This  
18  
19 calls for specific studies to identify the drivers of the state-specific temporal trends  
20  
21 followed by introducing tailored programs that target specific racial and ethnic  
22  
23 groups in specific states.  
24  
25  
26  
27  
28  
29  
30  
31  
32  
33  
34  
35  
36  
37  
38  
39  
40  
41  
42  
43  
44  
45  
46  
47  
48  
49  
50  
51  
52  
53  
54  
55  
56  
57  
58  
59  
60

1  
2  
3  
4  
5  
6  
7  
8  
9  
10  
11  
12  
13  
14  
15  
16  
17  
18  
19  
20  
21  
22  
23  
24  
25  
26  
27  
28  
29  
30  
31  
32  
33  
34  
35  
36  
37  
38  
39  
40  
41  
42  
43  
44  
45  
46  
47  
48  
49

**Table 1: Trends in firearm deaths in the United States, WISQARS 2000-2010.**

|                             | Age-adjusted firearm deaths per 100,000 population |       |       |       |       |       |       |       |       |       |       |       | Change  |                |       |         |
|-----------------------------|----------------------------------------------------|-------|-------|-------|-------|-------|-------|-------|-------|-------|-------|-------|---------|----------------|-------|---------|
|                             | 2000                                               | 2001  | 2002  | 2003  | 2004  | 2005  | 2006  | 2007  | 2008  | 2009  | 2010  | Total | Annual  | 95% CI         | SMD   | P-trend |
| All                         | 10.14                                              | 10.31 | 10.43 | 10.29 | 9.99  | 10.27 | 10.22 | 10.24 | 10.23 | 10.05 | 10.07 | 10.21 | -0.017  | -0.044, 0.010  | -0.44 | 0.181   |
| <b>Race</b>                 |                                                    |       |       |       |       |       |       |       |       |       |       |       |         |                |       |         |
| White                       | 8.97                                               | 9.21  | 9.19  | 9.05  | 8.84  | 8.98  | 8.80  | 8.98  | 9.18  | 9.13  | 9.20  | 9.05  | 0.006   | -0.027, 0.039  | 0.11  | 0.705   |
| Black                       | 18.30                                              | 18.32 | 19.22 | 19.01 | 18.31 | 19.34 | 19.98 | 19.31 | 18.19 | 17.15 | 16.90 | 18.51 | -0.114  | -0.311, 0.082  | -0.40 | 0.220   |
| Other                       | 4.76                                               | 3.89  | 4.19  | 4.03  | 3.70  | 3.88  | 3.83  | 3.38  | 3.25  | 3.37  | 3.25  | 3.38  | -0.121  | -0.166, -0.076 | -1.83 | <0.0001 |
| <b>Ethnicity</b>            |                                                    |       |       |       |       |       |       |       |       |       |       |       |         |                |       |         |
| Hispanic                    | 7.81                                               | 7.73  | 7.63  | 7.68  | 7.42  | 7.51  | 7.19  | 7.21  | 6.60  | 6.38  | 5.86  | 7.13  | -0.179  | -0.236, -0.122 | -2.13 | <0.0001 |
| Non-Hispanic                | 10.31                                              | 10.50 | 10.67 | 10.50 | 10.23 | 10.53 | 10.54 | 10.61 | 10.74 | 10.55 | 10.71 | 10.54 | 0.027   | -0.002, 0.056  | 0.63  | 0.068   |
| <b>Intent</b>               |                                                    |       |       |       |       |       |       |       |       |       |       |       |         |                |       |         |
| Homicide/Legal Intervention | 3.88                                               | 4.05  | 4.17  | 4.19  | 4.05  | 4.28  | 4.40  | 4.32  | 4.14  | 3.89  | 3.73  | 4.10  | -0.008  | -0.054, 0.038  | -0.12 | 0.705   |
| Suicide                     | 5.90                                               | 5.90  | 5.92  | 5.77  | 5.65  | 5.66  | 5.54  | 5.63  | 5.82  | 5.91  | 6.06  | 5.80  | 0.001   | -0.035, 0.038  | 0.03  | 0.932   |
| Undetermined                | 0.08                                               | 0.08  | 0.08  | 0.08  | 0.08  | 0.07  | 0.07  | 0.09  | 0.09  | 0.07  | 0.08  | 0.08  | -0.0001 | -0.002, 0.002  | -0.02 | 0.944   |
| Unintentional               | 0.27                                               | 0.28  | 0.26  | 0.25  | 0.22  | 0.27  | 0.21  | 0.20  | 0.19  | 0.18  | 0.20  | 0.23  | -0.010  | -0.014, -0.006 | -1.70 | <0.0001 |

All values are age-adjusted rates per 100,000 persons. Change denotes annual change in rate per 100,000. Negative value indicates decline in firearm death rates per 100,000 from 2000-2010 and positive value indicates increase in firearm death rate per 100,000 from 2000-2010. CI denotes confidence intervals of the annual change in firearm death rate per 100,000. SMD indicates standardized mean difference; is equal to annual change/standard deviation. P-trend calculated using meta-regression indicates the significance of the decline or the increase in firearm related death rates from 2000-2010. Data are from Center for Disease Control and Prevention (CDC)'s National center for Injury Prevention and Control Web-based Injury Statistics Query and Reporting System (WISQARS).



## Figure legends

### Figure 1: Firearm related fatality rates from 2000-2010.

Firearm related fatality rates are 11-year cumulative age-adjusted rates per 100,000 persons from 2000 to 2010 for each of the 50 states and District of Columbia ranging from 3.02 (HI) to 21.71 (DC) per 100,000. The colors represent increasing rates from blue to red. Significant decline in 7 states (AZ, CA, IL, MD, NV, NY and NC and DC) are represented as gold stars and significant increase in FL and MA as black stars within the map and in the table.

The table summarizes the rates per 100,000, annual change in rate and p-trend for those states that show significant increase or decrease. "FRF" denotes firearm related fatality. "Change" indicates the annual change in rates from 2000 to 2010. "P-trend" indicates the significance of the decline or the increase in firearm related fatality rates from 2000 to 2010 and was calculated using meta-regression. Negative values for change indicate a decrease while positive values indicate increase in rates across the years. The intent-specific rates of firearm related fatality is denoted with arrows in the table below: downward arrow denotes reduction in rates, upward arrows indicate an increase and two-way arrows indicate no change. "ne" represents data which cannot be estimated due to frequency <10. HI (11-year=3.02, change=-0.057, p-trend=0.36) and AK (11-year=18.09, change=0.10, p-trend=0.64) are not represented in the map.

### Figure 2: Firearm related fatality rates from 2000-2010 according to race.

#### Whites:

Firearm related fatality rates are 11-year cumulative age-adjusted rates per 100,000 persons from 2000 to 2010 for each of the 50 states and District of Columbia; ranging from 2.57 (MA) to 16.30 (NV) per 100,000. The colors represent increasing rates from blue to red. White represents no data or states where the frequency was <10 among whites. Significant decline in 4 states (CA, NY, IL and NC) are represented as gold stars and significant increase in MA and FL as black stars. HI (11-year=4.29, change=0.03, p-trend=0.84) and AK (11-year=15.77, change=0.15, p-trend=0.56) are not represented in the map.

#### Blacks:

Firearm related fatality rates are 11-year cumulative age-adjusted rates per 100,000 persons from 2000 to 2010 for each of the 50 states and District of Columbia; ranging from 2.93 (HI) to 40.95 (DC) per 100,000. The colors represent increasing rates from blue to red. White represents no data or states where the frequency was <10 among blacks. Significant decline in 8 states (CA, NV, AZ, KA, MN, IN, NC and DC) are represented as gold stars and significant increase in OK, OH and DL as black stars. HI (11-year=2.93) and AK (11-year=12.36) are not represented in the map.

#### Other race:

1  
2  
3  
4  
5  
6  
7  
8  
9  
10  
11  
12  
13  
14  
15  
16  
17  
18  
19  
20  
21  
22  
23  
24  
25  
26  
27  
28  
29  
30  
31  
32  
33  
34  
35  
36  
37  
38  
39  
40  
41  
42  
43  
44  
45  
46  
47  
48  
49  
50  
51  
52  
53  
54  
55  
56  
57  
58  
59  
60

Firearm related fatality rates are 11-year cumulative age-adjusted rates per 100,000 persons from 2000 to 2010 for each of the 50 states and District of Columbia; ranging from 0.82 (NY) to 22.54 (AK) per 100,000. The colors represent increasing rates from blue to red. White represents no data or states where the frequency was <10 among other race. Significant decline in 2 states (CA and TX) are represented as gold stars and there were no states with significant increase. HI (11-year=2.18, change=-0.04, p-trend=0.50) and AK (11-year=22.54, change=-0.15, p-trend=0.75) are not represented in the map.

**Figure 3: Firearm related fatality rates from 2000-2010 according to ethnicity.**

Hispanic:

Firearm related fatality rates are 11-year cumulative age-adjusted rates per 100,000 persons from 2000 to 2010 for each of the 50 states and District of Columbia; ranging from 3.13 (NJ) to 15.63 (ND) per 100,000. The colors represent increasing rates from blue to red. White represents no data or states where the frequency was <10 among Hispanics. Significant decline in 9 states (CA, AZ, NV, OR, UT, TX, IL, GA and NY) are represented as gold stars and there were no states with significant increase. HI (11-year=3.84) and AK (11-year=8.95) are not represented in the map.

Non-Hispanic:

Firearm related fatality rates are 11-year cumulative age-adjusted rates per 100,000 persons from 2000 to 2010 for each of the 50 states and District of Columbia; ranging from 2.95 (HI) to 23.45 (DC) per 100,000. The colors represent increasing rates from blue to red. White represents no data or states where the frequency was <10 among non-Hispanics. Significant decline in 3 states (CA, NC and DC) are represented as gold stars and significant increase in 7 states (TX, OK, FL, OH, PA, DL, and MA) as black stars. HI (11-year=2.95, change=-0.05, p-trend=0.50) and AK (11-year=18.44, change=0.13, p-trend=0.57) are not represented in the map.

**Figure 4: Firearm related fatality rates from 2000-2010 according to intent.**

Homicide:

Firearm related fatality rates are 11-year cumulative age-adjusted rates per 100,000 persons from 2000 to 2010 for each of the 50 states and District of Columbia; ranging from 0.65 (NH) to 19.75 (DC) per 100,000. The colors represent increasing rates from blue to red. White represents no data or states where the frequency was <10. Significant decline in 5 states (NV, IL, NC, NY and DC) are represented as gold stars and significant increase in MO, FL, OH, MA, CT, and DL as black stars. HI (11-year=0.79, change=-0.01, p-trend=0.68) and AK (11-year=3.54, change=0.001, p-trend=0.95) are not represented in the map.

Suicide:

Firearm related fatality rates are 11-year cumulative age-adjusted rates per 100,000 persons from 2000 to 2010 for each of the 50 states and District of Columbia; ranging from 1.61 (MA) to 13.79 (AK) per 100,000. The colors represent increasing

1  
2  
3 rates from blue to red. White represents no data or states where the frequency was  
4 <10. Significant decline in 2 states (CA and NC) are represented as gold stars and  
5 there were no states with significant increase. HI (11-year=2.10, change=-0.001, p-  
6 trend=0.95) and AK (11-year=13.79, change=0.11, p-trend=0.61) are not  
7 represented in the map.  
8  
9

10  
11 Undetermined:

12 Firearm related fatality rates are 11-year cumulative age-adjusted rates per 100,000  
13 persons from 2000 to 2010 for each of the 50 states and District of Columbia;  
14 ranging from 0.01 (NJ) to 0.47 (AK) per 100,000. The colors represent increasing  
15 rates from blue to red. White represents no data or states where the frequency was  
16 <10. There was no significant decline or increasing state-specific trends. HI (11-  
17 year=ne) and AK (11-year=0.47) are not represented in the map.  
18  
19

20  
21 Unintentional:

22 Firearm related fatality rates are 11-year cumulative age-adjusted rates per 100,000  
23 persons from 2000 to 2010 for each of the 50 states and District of Columbia;  
24 ranging from 0.04 (MA) to 0.83 (LO) per 100,000. The colors represent increasing  
25 rates from blue to red. White represents no data or states where the frequency was  
26 <10. Significant decline in 3 states (OH, KN and TN) are represented as gold stars  
27 and there were no states with significant increase. HI (11-year=0.08) and AK (11-  
28 year=0.29) are not represented in the map.  
29  
30  
31  
32  
33  
34  
35  
36  
37  
38  
39  
40  
41  
42  
43  
44  
45  
46  
47  
48  
49  
50  
51  
52  
53  
54  
55  
56  
57  
58  
59  
60

**Contributorship:**

Galea and Kalesan conceived and supervised the study. Kalesan, Vasana, and Villarreal completed the analyses. Kalesan, Galea, Mobily, Hlavacek, and Villarreal led the writing. Fagan, Teperman, Mobily, Villarreal and Hlavacek assisted with the study and analyses. Fagan, Teperman, Hlavacek, Villarreal, Mobily, Vasana, Galea, and Kalesan critically revised the work. Hlavacek and Mobily assisted with obtaining state gun laws.

~~Galea and Kalesan conceived and supervised the study. Kalesan and Vasana completed the analyses. Kalesan, Galea and Villarreal led the writing. Fagan, Teperman, Mobily and Hlavacek assisted with the study and analyses. Hlavacek assisted with obtaining state gun laws.~~

**Competing interests:**

None of the authors have competing interests to report

**Funding:**

There was no funding for this project

**Data sharing:**

All data used for the analysis are publicly available and there is no further data for data sharing purposes.

## REFERENCES

1. Centers for Disease Control and Prevention NCFIPaC. Web-based Injury Statistics Query and Reporting System (WISQARS). Atlanta, GA: National Center for Injury Prevention and Control, 2005.
2. Murphy SL, Jiaquan X, K.D. K. Deaths: Final Data for 2010. *National Vital Statistics Reports*, 2013;1-168.
3. Ikeda RM, Gorwitz R, James SP, Powell KE, Mercy JA. Trends in fatal firearm-related injuries, United States, 1962-1993. *American journal of preventive medicine* 1997;13(5):396-400.
4. Gotsch KE, Annett JL, Mercy JA, Ryan GW. Surveillance for Fatal and Nonfatal Firearm-Related Injuries --- United States, 1993--1998. *MMWR Surveill Summ* 2001;50:1-32.
5. Harris AR, Fisher GA, Thomas SH. Homicide as a medical outcome: racial disparity in deaths from assault in US Level I and II trauma centers. *The journal of trauma and acute care surgery* 2012;72(3):773-82.
6. Kellermann AL, Rivara FP, Rushforth NB, Banton JG, Reay DT, Francisco JT, et al. Gun Ownership as a Risk Factor for Homicide in the Home. *New England Journal of Medicine* 1993;329(15):1084-91.
7. Firearm injury in the U.S. PA: Firearm & Injury Center at Penn, 2011.
8. Fleegler EW, Lee LK, Monuteaux MC, Hemenway D, Mannix R. Firearm Legislation and Firearm-Related Fatalities in the United States. *Jama Intern Med* 2013;173(9):732-40.
9. 2013 State Scorecard. In: Violence BCtPGVaLCtPG, editor. *Score Card*. Washington, DC, 2013.
10. Phillips JA. Factors associated with temporal and spatial patterns in suicide rates across U.S. states, 1976-2000. *Demography* 2013;50(2):591-614.
11. Hoyert DL, Arias E, Smith B, Murphy SL, Kochanek KD. Deaths: Final Data for 1999. *National vital statistics reports*. Hyattsville, Maryland: National Center for Health Statistics, 2001.
12. Egger M, Smith GD, Altman D. *Systematic Reviews in Health Care: Meta-analysis in Context*. London: BMJ Books, 2001.
13. Higgins JP, Thompson SG. Quantifying heterogeneity in a meta-analysis. *Statistics in medicine* 2002;21(11):1539-58.
14. Higgins JP, Thompson SG, Deeks JJ, Altman DG. Measuring inconsistency in meta-analyses. *BMJ* 2003;327(7414):557-60.
15. Cohen J. A power primer. *Psychological bulletin* 1992;112(1):155-9.
16. Rosenthal R, Rubin DB. A simple, general purpose display of magnitude of experimental effect. *J Educ Psychol* 1982;74(2):166-69.
17. Bangalore S, Messerli FH. Gun Ownership and Firearm-related Deaths. *The American journal of medicine* 2013;126(10):873-6.
18. Planty M, Truman JL. Firearm Violence, 1993-2011. U.S. Department of Justice: Bureau of Justice Statistics, 2013.

19. Christoffel KK. Firearm injuries: epidemic then, endemic now. *American journal of public health* 2007;97(4):626-9.
20. Nygaard DF. World population projections, 2020. *A 2020 vision for food, agriculture and the environment*. Washington DC: International Food Policy Research Institute, 1994.
21. Cherry D, Annest JL, Mercy JA, Kresnow M, Pollock DA. Trends in nonfatal and fatal firearm-related injury rates in the United States, 1985-1995. *Annals of emergency medicine* 1998;32(1):51-9.
22. Kalesan B, French C, Fagan JA, Fowler DL, Galea S. Firearm-related Hospitalizations and In-Hospital Mortality in the United States, 2000-2010. *American journal of epidemiology* 2013.
23. Schwebel DC, Lewis T, Simon TR, Elliott MN, Toomey SL, Tortolero SR, et al. Prevalence and Correlates of Firearm Ownership in the Homes of Fifth Graders: Birmingham, AL, Houston, TX, and Los Angeles, CA. *Health education & behavior : the official publication of the Society for Public Health Education* 2014.
24. Suicides and Self-Injury by Firearm. In: Bureau of Health Statistics and Research DoH, editor. Pennsylvania: Pennsylvania Department of Health, 2006.
25. David-Ferdon C, Dahlberg LL, Kegler SR. Homicide rates among persons aged 10-24 years - United States, 1981-2010. *MMWR. Morbidity and mortality weekly report* 2013;62(27):545-8.
26. (NIBRS) NI-BRS. National Incident-Based Reporting System (NIBRS). Commonwealth of Massachusetts, 2013.
27. Guns TT. Top Sources of Crime Guns in America, 2010.
28. Chapter 790: Weapons and Firearms. The 2009 Florida Statutes. In: Legislature TF, editor. XLVI. Florida, 2009.
29. Crime in Florida, Florida uniform crime report. In: (1992-2012). FSACF, editor. Tallahassee, FL: Florida Statistical Analysis Center: FDLE, 2013.
30. Harris KD. Homicide in California 2010. California: California Department of Justice, 2010.
31. Coyne-Beasley T, Lees AC. Fatal and nonfatal firearm injuries in North Carolina. *North Carolina medical journal* 2010;71(6):565-8.
32. Halliday RC. Crime in Arizona 2002. *An annual report compiled by Access Integrity Unit of the Arizona Department of Public Safety*. Phoenix, AZ: Arizona Department of Public Safety, 2002.
33. Halliday RC. Crime in Arizona 2010. *An annual report compiled by Access Integrity Unit of the Arizona Department of Public Safety*. Phoenix, AZ: Arizona Department of Public Safety, 2010.
34. Crime in Nevada 2010. In: Safety NDoP, editor. *Crime in Nevada: State of Nevada, Department of Public Safety*, 2012.
35. Assistance BoJ. Reducing Crime Through Intelligence-Led Policing. Washington, D.C: Office of Justice Programs, US Department of Justice, 2012:24-26.
36. Medlin L, Davis J. Scorecard on Crime and Justice in North Carolina: Criminal Justice Analysis Center, 2012.



- 1  
2  
3  
4  
5  
6  
7  
8  
9  
10  
11  
12  
13  
14  
15  
16  
17  
18  
19  
20  
21  
22  
23  
24  
25  
26  
27  
28  
29  
30  
31  
32  
33  
34  
35  
36  
37  
38  
39  
40  
41  
42  
43  
44  
45  
46  
47  
48  
49  
50  
51  
52  
53  
54  
55  
56  
57  
58  
59  
60
37. Crime in the United States, 2006. Retrieved (April 14, 2014), from <http://www.fbi.gov/about-us/cjis/ucr/crime-in-the-u.s/2006>. In: United States Department of Justice FBoI, editor, 2007.
  38. Part I and II Arrests for Florida by Age, Sex, and Race. *Annual Crime in Florida*. FL: Florida Department of Law Enforcement, 2012.
  39. Violent Deaths in Massachusetts: Surveillance Update 2010: Massachusetts Department of Public Health, 2013.
  40. J.M S. Maintaining racial inequality through crime control: mass incarceration and residential segregation. *Contemp Justice Review* 2012;15(4):469-84.
  41. Clark W, Welch SN, Berry SH, Collentine AM, Collins R, Lebron D, et al. California's historic effort to reduce the stigma of mental illness: the Mental Health Services Act. *American journal of public health* 2013;103(5):786-94.

1  
2  
3  
4  
5  
6  
7  
8  
9  
10  
11  
12  
13  
14  
15  
16  
17  
18  
19  
20  
21  
22  
23  
24  
25  
26  
27  
28  
29  
30  
31  
32  
33  
34  
35  
36  
37  
38  
39  
40  
41  
42  
43  
44  
45  
46  
47  
48  
49  
50  
51  
52  
53  
54  
55  
56  
57  
58  
59  
60



Figure 1: Firearm related fatality rates from 2000-2010.

Firearm related fatality rates are 11-year cumulative age-adjusted rates per 100,000 persons from 2000 to 2010 for each of the 50 states and District of Columbia ranging from 3.02 (HI) to 21.71 (DC) per 100,000. The colors represent increasing rates from blue to red. Significant decline in 7 states (AZ, CA, IL, MD, NV, NY and NC and DC) are represented as gold stars and significant increase in FL and MA as black stars within the map and in the table.

The table summarizes the rates per 100,000, annual change in rate and p-trend for those states that show significant increase or decrease. "FRF" denotes firearm related fatality. "Change" indicates the annual change in rates from 2000 to 2010. "P-trend" indicates the significance of the decline or the increase in firearm related fatality rates from 2000 to 2010 and was calculated using meta-regression. Negative values for change indicate a decrease while positive values indicate increase in rates across the years. The intent-specific rates of firearm related fatality is denoted with arrows in the table below: downward arrow denotes reduction in rates, upward arrows indicate an increase and two-way arrows indicate no change. "ne" represents data which cannot be estimated due to frequency <10. HI (11-year=3.02, change=-0.057, p-trend=0.36) and AK (11-year=18.09, change=0.10, p-trend=0.64) are not represented in the map.

254x190mm (300 x 300 DPI)



Figure 2

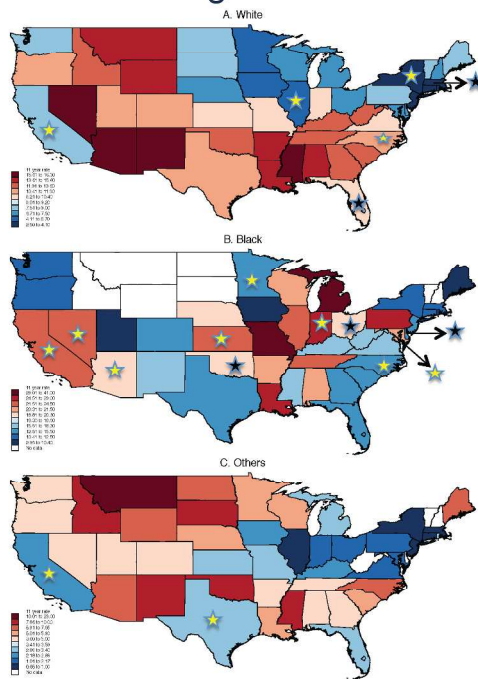

Figure 2: Firearm related fatality rates from 2000-2010 according to race.

**Whites:**

Firearm related fatality rates are 11-year cumulative age-adjusted rates per 100,000 persons from 2000 to 2010 for each of the 50 states and District of Columbia; ranging from 2.57 (MA) to 16.30 (NV) per 100,000.

The colors represent increasing rates from blue to red. White represents no data or states where the frequency was <10 among whites. Significant decline in 4 states (CA, NY, IL and NC) are represented as gold stars and significant increase in MA and FL as black stars. HI (11-year=4.29, change=0.03, p-trend=0.84) and AK (11-year=15.77, change=0.15, p-trend=0.56) are not represented in the map.

**Blacks:**

Firearm related fatality rates are 11-year cumulative age-adjusted rates per 100,000 persons from 2000 to 2010 for each of the 50 states and District of Columbia; ranging from 2.93 (HI) to 40.95 (DC) per 100,000.

The colors represent increasing rates from blue to red. White represents no data or states where the frequency was <10 among blacks. Significant decline in 8 states (CA, NV, AZ, KA, MN, IN, NC and DC) are represented as gold stars and significant increase in OK, OH and DL as black stars. HI (11-year=2.93) and AK (11-year=12.36) are not represented in the map.

**Other race:**

Firearm related fatality rates are 11-year cumulative age-adjusted rates per 100,000 persons from 2000 to 2010 for each of the 50 states and District of Columbia; ranging from 0.82 (NY) to 22.54 (AK) per 100,000.

The colors represent increasing rates from blue to red. White represents no data or states where the frequency was <10 among other race. Significant decline in 2 states (CA and TX) are represented as gold stars and there were no states with significant increase. HI (11-year=2.18, change=-0.04, p-trend=0.50) and AK (11-year=22.54, change=-0.15, p-trend=0.75) are not represented in the map.

254x190mm (300 x 300 DPI)

Figure 3

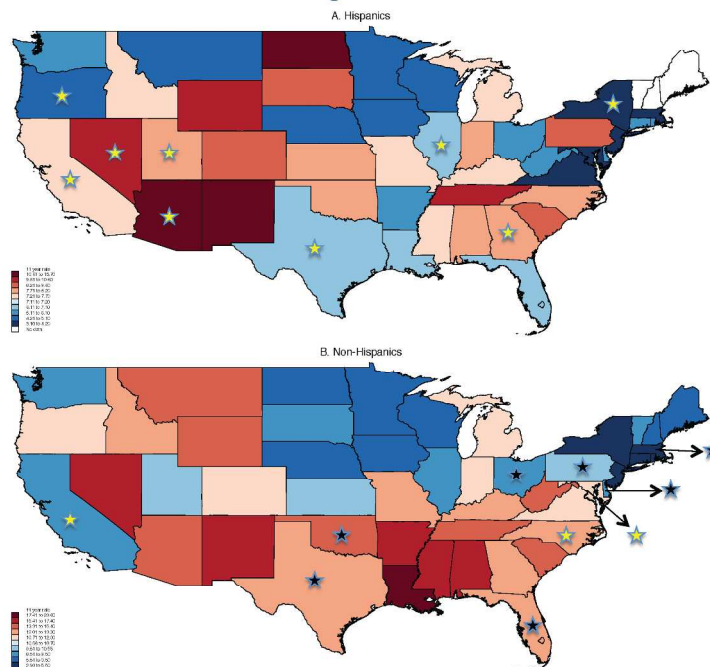

Figure 3: Firearm related fatality rates from 2000-2010 according to ethnicity.

#### Hispanic:

Firearm related fatality rates are 11-year cumulative age-adjusted rates per 100,000 persons from 2000 to 2010 for each of the 50 states and District of Columbia; ranging from 3.13 (NJ) to 15.63 (ND) per 100,000.

The colors represent increasing rates from blue to red. White represents no data or states where the frequency was <10 among Hispanics. Significant decline in 9 states (CA, AZ, NV, OR, UT, TX, IL, GA and NY) are represented as gold stars and there were no states with significant increase. HI (11-year=3.84) and AK (11-year=8.95) are not represented in the map.

#### Non-Hispanic:

Firearm related fatality rates are 11-year cumulative age-adjusted rates per 100,000 persons from 2000 to 2010 for each of the 50 states and District of Columbia; ranging from 2.95 (HI) to 23.45 (DC) per 100,000.

The colors represent increasing rates from blue to red. White represents no data or states where the frequency was <10 among non-Hispanics. Significant decline in 3 states (CA, NC and DC) are represented as gold stars and significant increase in 7 states (TX, OK, FL, OH, PA, DL, and MA) as black stars. HI (11-year=2.95, change=-0.05, p-trend=0.50) and AK (11-year=18.44, change=0.13, p-trend=0.57) are not represented in the map.

254x190mm (300 x 300 DPI)

Figure 4

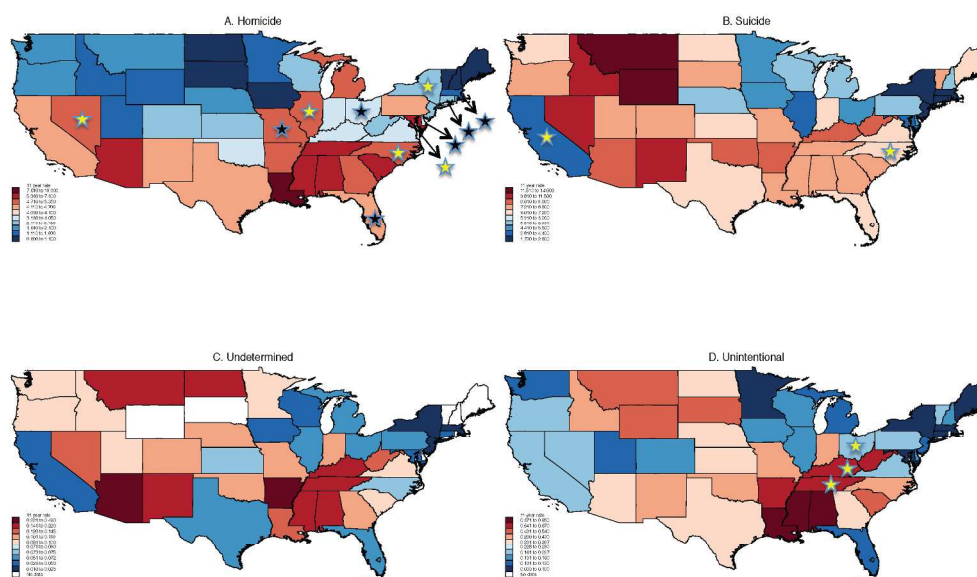

Figure 4: Firearm related fatality rates from 2000-2010 according to intent.

#### Homicide:

Firearm related fatality rates are 11-year cumulative age-adjusted rates per 100,000 persons from 2000 to 2010 for each of the 50 states and District of Columbia; ranging from 0.65 (NH) to 19.75 (DC) per 100,000.

The colors represent increasing rates from blue to red. White represents no data or states where the frequency was <10. Significant decline in 5 states (NV, IL, NC, NY and DC) are represented as gold stars and significant increase in MO, FL, OH, MA, CT, and DL as black stars. HI (11-year=0.79, change=-0.01, p-trend=0.68) and AK (11-year=3.54, change=0.001, p-trend=0.95) are not represented in the map.

#### Suicide:

Firearm related fatality rates are 11-year cumulative age-adjusted rates per 100,000 persons from 2000 to 2010 for each of the 50 states and District of Columbia; ranging from 1.61 (MA) to 13.79 (AK) per 100,000.

The colors represent increasing rates from blue to red. White represents no data or states where the frequency was <10. Significant decline in 2 states (CA and NC) are represented as gold stars and there were no states with significant increase. HI (11-year=2.10, change=-0.001, p-trend=0.95) and AK (11-year=13.79, change=0.11, p-trend=0.61) are not represented in the map.

#### Undetermined:

Firearm related fatality rates are 11-year cumulative age-adjusted rates per 100,000 persons from 2000 to 2010 for each of the 50 states and District of Columbia; ranging from 0.01 (NJ) to 0.47 (AK) per 100,000.

The colors represent increasing rates from blue to red. White represents no data or states where the frequency was <10. There was no significant decline or increasing state-specific trends. HI (11-year=ne) and AK (11-year=0.47) are not represented in the map.

#### Unintentional:

Firearm related fatality rates are 11-year cumulative age-adjusted rates per 100,000 persons from 2000 to 2010 for each of the 50 states and District of Columbia; ranging from 0.04 (MA) to 0.83 (LO) per 100,000.

The colors represent increasing rates from blue to red. White represents no data or states where the frequency was <10. Significant decline in 3 states (OH, KN and TN) are represented as gold stars and there

1  
2  
3  
4  
5  
6  
7  
8  
9  
10  
11  
12  
13  
14  
15  
16  
17  
18  
19  
20  
21  
22  
23  
24  
25  
26  
27  
28  
29  
30  
31  
32  
33  
34  
35  
36  
37  
38  
39  
40  
41  
42  
43  
44  
45  
46  
47  
48  
49  
50  
51  
52  
53  
54  
55  
56  
57  
58  
59  
60

were no states with significant increase. HI (11-year=0.08) and AK (11-year=0.29) are not represented in the map.  
254x190mm (300 x 300 DPI)

For peer review only

Supplementary Figure 1A:

Firearm deaths from 2000 to 2010 by U.S census regions among whites

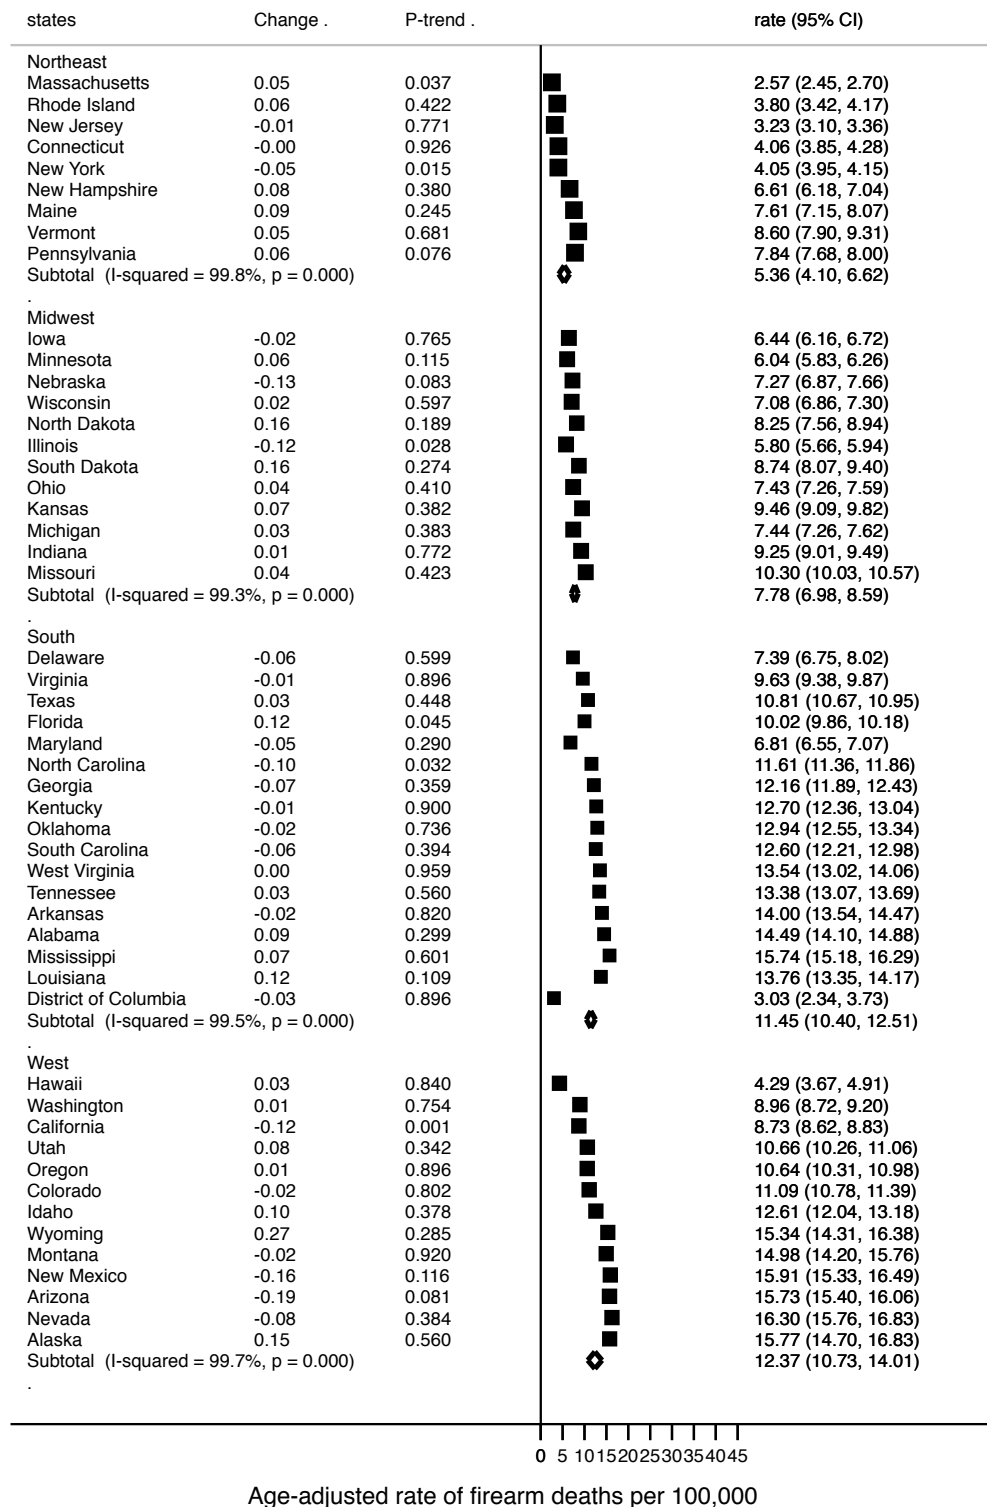

## Supplementary Figure 1B:

## Firearm deaths from 2000 to 2010 by U.S census regions among blacks



Supplementary Figure 1C

Firearm deaths from 2000 to 2010 by U.S census regions among other race



## Supplementary Figure 2A:

## Firearm deaths from 2000 to 2010 by U.S census regions among hispanics





Supplementary Figure 2B:

Firearm deaths from 2000 to 2010 by U.S census regions among non-hispani



## Supplementary Figure 3A:

## Firearm deaths due to homicide from 2000 to 2010 by U.S census regions



Supplementary Figure 3B:

Firearm deaths due to suicides from 2000 to 2010 by U.S census regions

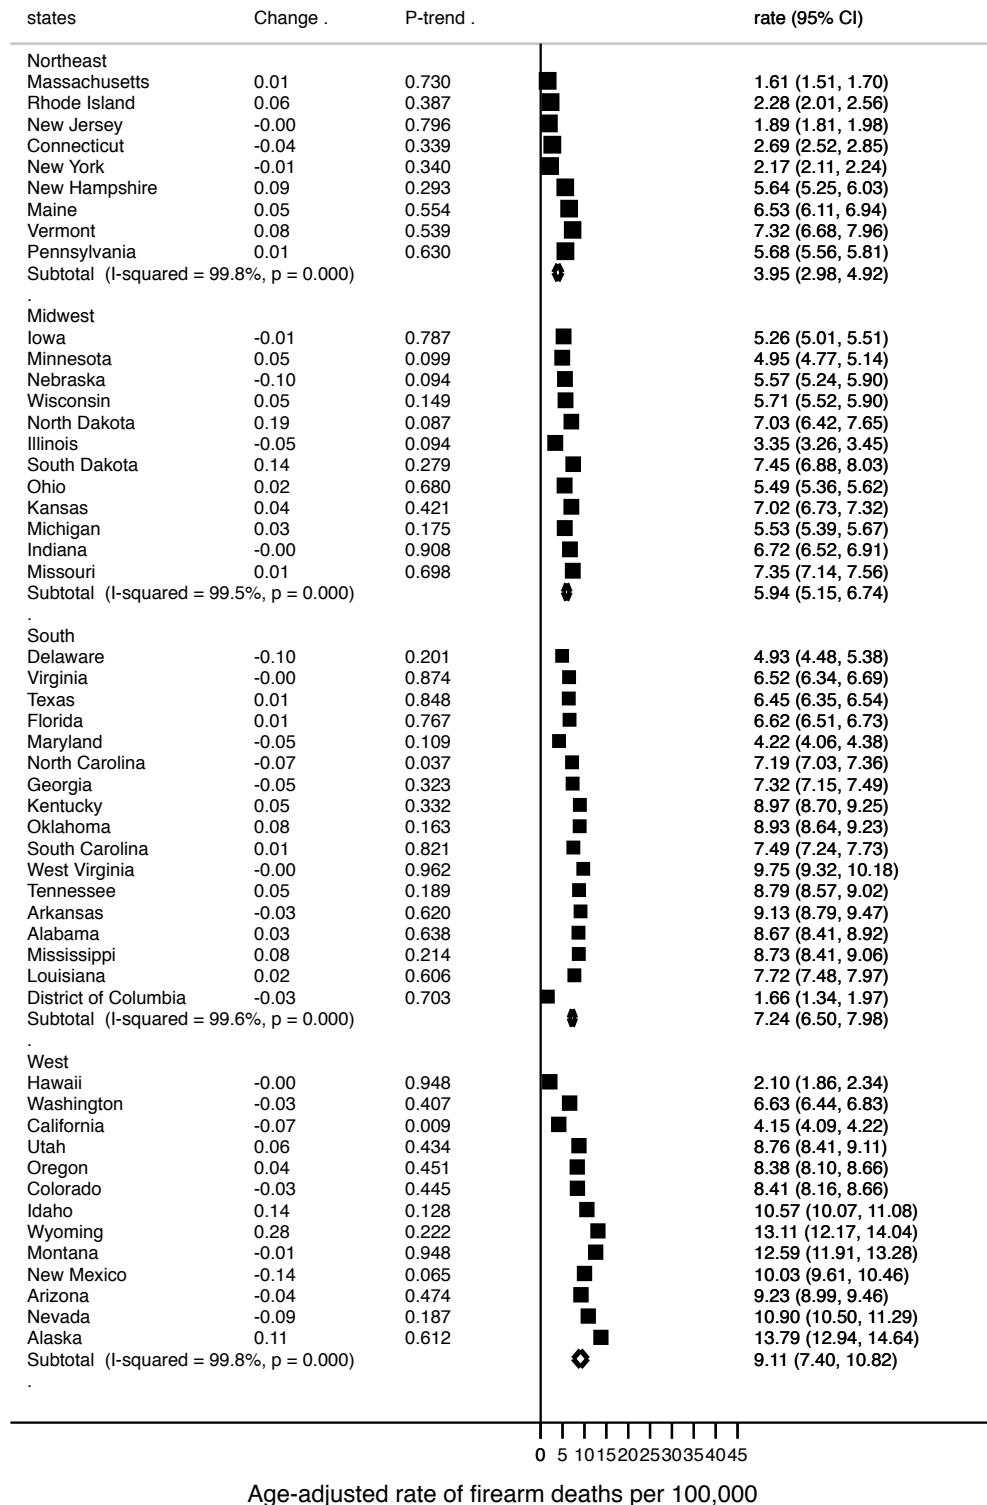

## Supplementary Figure 3C:

## Undetermined firearm deaths from 2000 to 2010 by U.S census regions



Supplementary Figure 3D:

Unintentional firearm deaths from 2000 to 2010 by U.S census regions

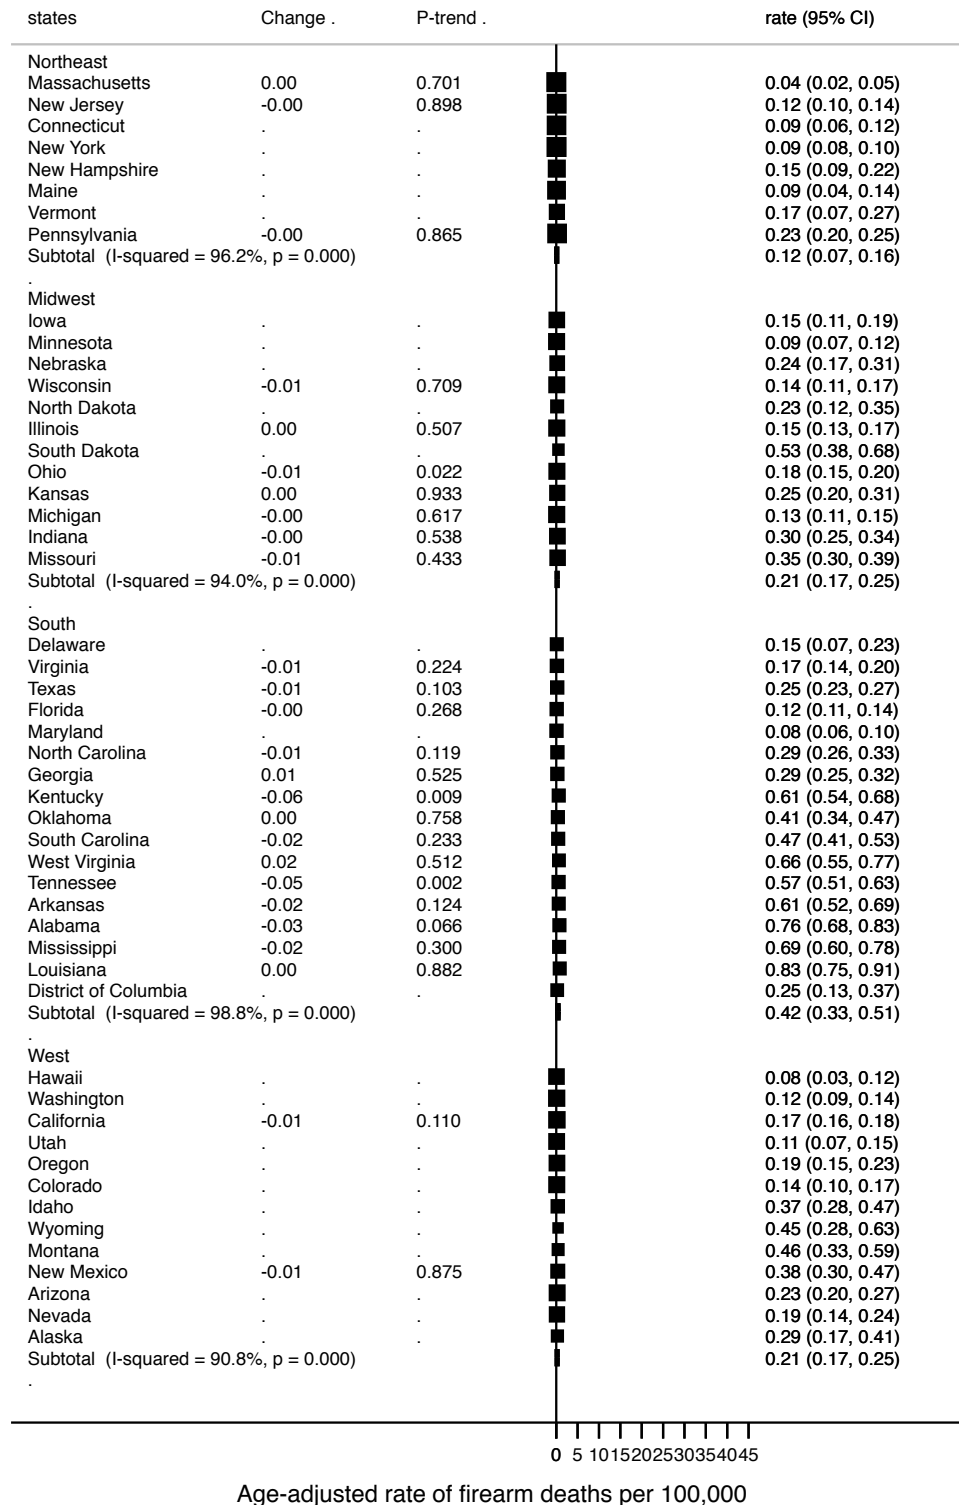

Supplementary Table 1: Firearm related trends in death, annual rate of change in death, lives lost and saved in the United States by states, WISQARS 2000 to 2010.

|                  | Age-adjusted firearm deaths per 100,000 population |       |       |       |       |       |       |       |       |       |       |       | Change in rate |                |         | Lives lost/ saved (-) |          |
|------------------|----------------------------------------------------|-------|-------|-------|-------|-------|-------|-------|-------|-------|-------|-------|----------------|----------------|---------|-----------------------|----------|
|                  | 2000                                               | 2001  | 2002  | 2003  | 2004  | 2005  | 2006  | 2007  | 2008  | 2009  | 2010  | Total | Annual         | 95% CI         | P-trend | 11 years              | Per year |
| All              | 10.14                                              | 10.31 | 10.43 | 10.29 | 9.99  | 10.27 | 10.22 | 10.24 | 10.23 | 10.05 | 10.07 | 10.21 | -0.17          | -0.044, 0.010  | 0.181   | -5527.8               | -502.5   |
| <b>Northeast</b> |                                                    |       |       |       |       |       |       |       |       |       |       |       |                |                |         |                       |          |
| Massachusetts    | 2.73                                               | 3.00  | 3.13  | 3.09  | 3.16  | 3.42  | 3.22  | 3.55  | 3.34  | 3.1   | 4.03  | 3.24  | 0.074          | 0.025, 0.122   | 0.008   | 52.4                  | 4.8      |
| Rhode Island     | 5.10                                               | 4.30  | 5.14  | 3.12  | 3.61  | 3.60  | 4.21  | 3.40  | 3.94  | 5.02  | 4.60  | 4.18  | -0.013         | -0.180, 0.155  | 0.869   | -1.5                  | -0.1     |
| New Jersey       | 4.11                                               | 4.44  | 4.88  | 5.42  | 5.37  | 5.15  | 5.82  | 5.25  | 4.94  | 4.70  | 5.20  | 5.03  | 0.063          | -0.035, 0.161  | 0.182   | 59.8                  | 5.4      |
| Connecticut      | 5.32                                               | 5.63  | 4.32  | 4.37  | 5.00  | 5.34  | 4.99  | 4.15  | 5.60  | 4.90  | 5.85  | 5.04  | 0.028          | -0.103, 0.159  | 0.637   | 10.8                  | 1.0      |
| New York         | 5.70                                               | 5.54  | 5.13  | 5.32  | 4.88  | 5.21  | 5.14  | 5.04  | 4.90  | 4.79  | 5.07  | 5.15  | -0.064         | -0.104, -0.023 | 0.006   | -134.9                | -12.3    |
| New Hampshire    | 6.27                                               | 7.23  | 5.91  | 6.8   | 5.02  | 6.62  | 6.22  | 5.56  | 6.86  | 6.34  | 8.22  | 6.49  | 0.065          | -0.126, 0.255  | 0.461   | 9.2                   | 0.8      |
| Maine            | 8.55                                               | 7.29  | 6.63  | 6.02  | 7.9   | 7.71  | 7.28  | 7.61  | 8.42  | 8.58  | 7.86  | 7.61  | 0.100          | -0.077, 0.277  | 0.232   | 14.4                  | 1.3      |
| Vermont          | 8.74                                               | 8.20  | 9.74  | 7.58  | 9.41  | 6.79  | 8.14  | 8.08  | 8.19  | 8.72  | 10.21 | 8.53  | 0.037          | -0.222, 0.296  | 0.753   | 2.5                   | 0.2      |
| Pennsylvania     | 10.15                                              | 9.53  | 9.96  | 9.87  | 10.2  | 10.76 | 10.9  | 10.52 | 10.53 | 10.41 | 10.11 | 10.27 | 0.064          | -0.014, 0.142  | 0.095   | 87.8                  | 8.0      |
| <b>Midwest</b>   |                                                    |       |       |       |       |       |       |       |       |       |       |       |                |                |         |                       |          |
| Iowa             | 6.46                                               | 6.37  | 6.73  | 6.94  | 6.45  | 6.71  | 6.34  | 4.99  | 7.25  | 6.23  | 6.8   | 6.5   | -0.017         | -0.157, 0.124  | 0.796   | -5.6                  | -0.5     |
| Minnesota        | 6.34                                               | 6.49  | 6.06  | 6.5   | 7.04  | 6.94  | 6.3   | 6.48  | 6.97  | 6.17  | 6.76  | 6.57  | 0.024          | -0.053, 0.101  | 0.495   | 13.5                  | 1.2      |
| Nebraska         | 9.77                                               | 8.12  | 8.05  | 7.64  | 6.71  | 7.67  | 7.69  | 7.95  | 8.27  | 7.26  | 8.16  | 7.94  | -0.071         | -0.231, 0.090  | 0.346   | -13.8                 | -1.3     |
| Wisconsin        | 7.99                                               | 8.70  | 8.08  | 8.44  | 7.37  | 8.48  | 7.56  | 8.54  | 7.72  | 7.91  | 8.57  | 8.14  | -0.008         | -0.113, 0.096  | 0.859   | -4.9                  | -0.4     |
| North Dakota     | 6.6                                                | 7.6   | 9.12  | 8.83  | 7.5   | 8.9   | 6.62  | 8.27  | 8.51  | 8.92  | 9.56  | 8.23  | 0.155          | -0.086, 0.395  | 0.180   | 11.1                  | 1.0      |
| Illinois         | 9.00                                               | 10.21 | 9.69  | 9.01  | 7.8   | 8.01  | 8.08  | 8.03  | 8.55  | 8.17  | 8.19  | 8.61  | -0.155         | -0.286, -0.025 | 0.025   | -215.3                | -19.6    |
| South Dakota     | 7.47                                               | 7.1   | 7.91  | 9.86  | 9.97  | 10.2  | 9.74  | 6.14  | 10.5  | 9.31  | 9.23  | 8.89  | 0.157          | -0.168, 0.481  | 0.304   | 13.5                  | 1.2      |
| Ohio             | 7.81                                               | 9.00  | 9.31  | 8.12  | 8.97  | 9.63  | 9.66  | 9.55  | 9.67  | 8.5   | 9.95  | 9.1   | 0.122          | -0.010, 0.253  | 0.066   | 153.8                 | 14.0     |
| Kansas           | 11.15                                              | 9.93  | 9.7   | 11.13 | 10.73 | 9.25  | 10.84 | 10.35 | 9.7   | 10.76 | 10.44 | 10.37 | -0.012         | -0.158, 0.135  | 0.860   | -3.6                  | -0.3     |
| Michigan         | 10.83                                              | 10.83 | 10.99 | 10.33 | 10.52 | 10.78 | 11.53 | 11.03 | 10.96 | 11.07 | 10.98 | 10.9  | 0.037          | -0.034, 0.109  | 0.271   | 40.6                  | 3.7      |
| Indiana          | 10.88                                              | 11.82 | 11.68 | 11.19 | 10.22 | 11.11 | 11.63 | 10.5  | 11.24 | 11.33 | 10.82 | 11.13 | -0.031         | -0.143, 0.081  | 0.546   | -21.4                 | -1.9     |
| Missouri         | 13.24                                              | 13.14 | 12.21 | 11.42 | 11.44 | 12.9  | 13    | 12.79 | 13.74 | 13.71 | 13.93 | 12.88 | 0.135          | -0.036, 0.306  | 0.108   | 86.1                  | 7.8      |
| <b>South</b>     |                                                    |       |       |       |       |       |       |       |       |       |       |       |                |                |         |                       |          |
| Delaware         | 6.66                                               | 9.47  | 9.07  | 7.86  | 8.78  | 8.78  | 9.19  | 8.91  | 10.65 | 8.76  | 9.88  | 8.89  | 0.201          | -0.018, 0.419  | 0.067   | 18.7                  | 1.7      |

1  
2  
3  
4  
5  
6  
7  
8  
9  
10  
11  
12  
13  
14  
15  
16  
17  
18  
19  
20  
21  
22  
23  
24  
25  
26  
27  
28  
29  
30  
31  
32  
33  
34  
35  
36  
37  
38  
39  
40  
41  
42  
43  
44  
45  
46  
47  
48  
49

|                      |       |       |       |       |       |       |       |       |       |       |       |       |        |                |       |        |       |
|----------------------|-------|-------|-------|-------|-------|-------|-------|-------|-------|-------|-------|-------|--------|----------------|-------|--------|-------|
| Virginia             | 11.13 | 10.61 | 11.01 | 10.86 | 10.81 | 11.48 | 10.36 | 10.4  | 10.18 | 10.28 | 10.69 | 10.71 | -0.068 | -0.149, 0.014  | 0.092 | -56.6  | -5.1  |
| Texas                | 10.57 | 11.22 | 10.83 | 11.21 | 10.66 | 11.09 | 10.47 | 10.89 | 10.83 | 10.98 | 10.93 | 10.89 | 0.001  | -0.054, 0.056  | 0.976 | 2.5    | 0.2   |
| Florida              | 10.19 | 10.68 | 10.97 | 11.05 | 10.46 | 9.95  | 11.05 | 12.02 | 12.18 | 11.98 | 11.44 | 11.12 | 0.160  | 0.038, 0.282   | 0.016 | 310.1  | 28.2  |
| Maryland             | 11.91 | 11.46 | 11.54 | 11.96 | 11.93 | 11.86 | 12.1  | 12.04 | 11.61 | 10.19 | 9.26  | 11.39 | -0.169 | -0.335, -0.002 | 0.048 | -103.5 | -9.4  |
| North Carolina       | 13.56 | 13.06 | 13.43 | 12.35 | 12.21 | 12.74 | 12.55 | 12.17 | 12.31 | 11.59 | 11.57 | 12.49 | -0.174 | -0.255, -0.092 | 0.001 | -168.1 | -15.3 |
| Georgia              | 13.4  | 13.44 | 13.39 | 13.72 | 12.16 | 12.05 | 12.54 | 13.4  | 12.43 | 13.06 | 12.62 | 12.92 | -0.076 | -0.197, 0.045  | 0.189 | -75.0  | -6.8  |
| Kentucky             | 13.25 | 12.69 | 13.04 | 13.38 | 13.04 | 12.94 | 12.47 | 14.11 | 13.28 | 12.78 | 12.48 | 13.05 | -0.020 | -0.140, 0.010  | 0.713 | -9.2   | -0.8  |
| Oklahoma             | 13.21 | 14.01 | 12.81 | 12.77 | 12.86 | 13.15 | 13.26 | 13.18 | 13.91 | 14.33 | 14.31 | 13.45 | 0.105  | -0.028, 0.238  | 0.108 | 41.3   | 3.8   |
| South Carolina       | 12.42 | 13.72 | 13.69 | 14.17 | 13.5  | 13.75 | 13.88 | 13.09 | 13.17 | 13.52 | 13.92 | 13.55 | 0.032  | -0.088, 0.152  | 0.561 | 15.2   | 1.4   |
| West Virginia        | 12.99 | 13.15 | 14.67 | 14.01 | 13.6  | 13.72 | 13.32 | 14.06 | 12.66 | 13.21 | 14.23 | 13.6  | 0.002  | -0.183, 0.188  | 0.978 | 0.4    | 0.0   |
| Tennessee            | 15.63 | 14.47 | 15.4  | 14.11 | 14.54 | 16.03 | 15.3  | 14.74 | 15.46 | 15.06 | 14.42 | 15.03 | -0.013 | -0.148, 0.123  | 0.837 | -8.6   | -0.8  |
| Arkansas             | 15.42 | 15.27 | 16.29 | 14.96 | 14.65 | 15.62 | 15.12 | 15.09 | 15.6  | 16.03 | 14.39 | 15.31 | -0.033 | -0.193, 0.126  | 0.648 | -10.1  | -0.9  |
| Alabama              | 17.14 | 16.41 | 16.08 | 16.8  | 14.79 | 15.99 | 16.7  | 17.24 | 17.31 | 17.18 | 16.18 | 16.53 | 0.045  | -0.128, 0.217  | 0.574 | 22.8   | 2.1   |
| Mississippi          | 16.56 | 17.64 | 17.34 | 16.81 | 16.41 | 15.98 | 16.54 | 18.28 | 19.25 | 16.65 | 16.05 | 17.06 | 0.015  | -0.209, 0.239  | 0.883 | 4.8    | 0.4   |
| Louisiana            | 17.58 | 17.46 | 19.31 | 18.61 | 19.52 | 18.35 | 19.02 | 19.77 | 18.34 | 18.03 | 19.11 | 18.62 | 0.082  | -0.081, 0.244  | 0.286 | 40.4   | 3.7   |
| District of Columbia | 22.24 | 25.46 | 29.79 | 25.71 | 22.64 | 23.47 | 19.99 | 21.66 | 20.01 | 15.96 | 14.62 | 21.71 | -1.067 | -1.621, -0.512 | 0.002 | -67.7  | -6.2  |
| <b>West</b>          |       |       |       |       |       |       |       |       |       |       |       |       |        |                |       |        |       |
| Hawaii               | 4.2   | 3.74  | 2.82  | 2.88  | 3.1   | 2.14  | 2.38  | 2.44  | 3.04  | 3.34  | 3.21  | 3.02  | -0.057 | -0.190, 0.076  | 0.359 | -8.1   | -0.7  |
| Washington           | 8.94  | 8.53  | 9.34  | 9.17  | 9.17  | 8.8   | 8.37  | 8.32  | 8.69  | 9.14  | 8.92  | 8.85  | -0.018 | -0.099, 0.063  | 0.623 | -12.5  | -1.1  |
| California           | 9.27  | 9.31  | 9.75  | 9.78  | 9.24  | 9.52  | 9.15  | 8.84  | 8.5   | 8.17  | 7.7   | 9.01  | -0.166 | -0.249, -0.083 | 0.001 | -652.3 | -59.3 |
| Utah                 | 9.93  | 10.99 | 9.6   | 10.51 | 10.13 | 9.91  | 9.75  | 10.63 | 9.68  | 10.46 | 12.16 | 10.39 | 0.081  | -0.077, 0.240  | 0.276 | 22.1   | 2.0   |
| Oregon               | 10.81 | 10.16 | 10.49 | 10.72 | 10.36 | 10.68 | 10.16 | 9.91  | 9.73  | 10.31 | 11.33 | 10.44 | -0.011 | -0.127, 0.106  | 0.839 | -4.4   | -0.4  |
| Colorado             | 10.36 | 11.68 | 11.47 | 11.13 | 11.96 | 11.53 | 10.33 | 10.38 | 10.39 | 11.58 | 10.72 | 11.05 | -0.045 | -0.183, 0.092  | 0.474 | -23.1  | -2.1  |
| Idaho                | 10.19 | 13.5  | 12.42 | 12.33 | 13.04 | 13.94 | 12.69 | 12.75 | 11.4  | 12.85 | 12.73 | 12.56 | 0.077  | -0.148, 0.302  | 0.459 | 12.1   | 1.1   |
| Wyoming              | 11.72 | 13.91 | 18.87 | 17.46 | 11.15 | 13.39 | 14.85 | 14.66 | 16.91 | 17.59 | 15.54 | 15.09 | 0.267  | -0.257, 0.791  | 0.279 | 15.3   | 1.4   |
| Montana              | 14.85 | 17.77 | 14.61 | 15.68 | 13.05 | 16.85 | 12.25 | 13.54 | 15.73 | 16.04 | 15.56 | 15.11 | -0.040 | -0.420, 0.341  | 0.819 | -4.2   | -0.4  |
| New Mexico           | 16.08 | 15.26 | 16.61 | 17.55 | 15.15 | 13.89 | 14.45 | 14.85 | 14.68 | 14.48 | 14.84 | 15.23 | -0.184 | -0.376, 0.008  | 0.058 | -39.2  | -3.6  |
| Arizona              | 15.58 | 15.92 | 17.89 | 15.29 | 15.84 | 16    | 16.22 | 15.38 | 14.36 | 13.49 | 14.53 | 15.47 | -0.230 | -0.423, -0.036 | 0.025 | -147.2 | -13.4 |
| Nevada               | 17.26 | 16.54 | 17.06 | 17.04 | 16.74 | 16.09 | 16.3  | 15.87 | 15.15 | 15.11 | 14.49 | 16.07 | -0.264 | -0.441, -0.086 | 0.008 | -69.9  | -6.4  |

1  
2  
3  
4  
5  
6  
7  
8  
9  
10  
11  
12  
13  
14  
15  
16  
17  
18  
19  
20  
21  
22  
23  
24  
25  
26  
27  
28  
29  
30  
31  
32  
33  
34  
35  
36  
37  
38  
39  
40  
41  
42  
43  
44  
45  
46  
47  
48  
49

|        |       |       |       |       |       |       |       |       |       |       |       |       |       |               |       |     |     |
|--------|-------|-------|-------|-------|-------|-------|-------|-------|-------|-------|-------|-------|-------|---------------|-------|-----|-----|
| Alaska | 17.96 | 14.83 | 19.89 | 19.24 | 17.51 | 17.47 | 16.94 | 18.22 | 20.92 | 14.68 | 20.51 | 18.09 | 0.102 | -0.375, 0.580 | 0.639 | 7.5 | 0.7 |
|--------|-------|-------|-------|-------|-------|-------|-------|-------|-------|-------|-------|-------|-------|---------------|-------|-----|-----|

All values are age-adjusted rates per 100,000 population.  
 Change denotes annual change in rate per 100,000. Negative value indicates decline in firearm death rates per 100,000 from 2000 to 2010 and positive value indicates increase in firearm death rate per 100,000 from 2000 to 2010.  
 CI denotes confidence intervals of the annual change in firearm death rate per 100,000.  
 P-trend calculated using meta-regression indicates the significance of the decline or the increase in firearm related death rates from 2000 to 2010.  
 Lives lost or saved are calculated by applying annual change to the total 11-year population from 2000 to 2010. The annual lives lost or saved are the total/ 11 years. Negative denotes lives saved and positive values are lives lost.  
 Data are from Center for Disease Control and Prevention (CDC)'s National center for Injury Prevention and Control Web-based Injury Statistics Query and Reporting System (WISQARS).



Supplementary Table 2: US states with significant racial and ethnic trends within firearm fatality rates

|              |               | GA           | IN           | KA           | MN           | OK           | OR           | PA           | TX           | UT           |
|--------------|---------------|--------------|--------------|--------------|--------------|--------------|--------------|--------------|--------------|--------------|
| Overall      | FRF rate      | 12.92        | 11.13        | 10.37        | 6.57         | 13.45        | 10.44        | 10.27        | 10.89        | 10.39        |
|              | Change        | -0.08        | -0.03        | -0.01        | 0.02         | 0.11         | -0.01        | 0.06         | 0.001        | 0.08         |
|              | P-trend       | 0.19         | 0.55         | 0.86         | 0.49         | 0.11         | 0.84         | 0.095        | 0.98         | 0.28         |
| Whites       | FRF rate      | 12.16        | 9.25         | 9.46         | 6.04         | 12.94        | 10.64        | 7.84         | 10.81        | 10.66        |
|              | Change        | -0.07        | 0.01         | 0.07         | 0.06         | -0.02        | 0.01         | 0.06         | 0.03         | 0.08         |
|              | P-trend       | 0.36         | 0.77         | 0.38         | 0.12         | 0.74         | 0.89         | 0.076        | 0.45         | 0.34         |
|              | Pop % change  | -3.8         | -2.0         | -1.7         | -3.3         | -2.2         | -2.0         | -2.6         | -2.3         | -1.4         |
| Blacks       | FRF rate      | 14.05        | 28.92        | 24.14        | 13.52        | 20.04        | 11.47        | 27.48        | 13.37        | 7.73         |
|              | Change        | -0.06        | <b>-0.66</b> | <b>-1.07</b> | <b>-0.61</b> | <b>0.93</b>  | -0.67        | -0.14        | -0.09        | ne           |
|              | P-trend       | 0.57         | <b>0.012</b> | <b>0.021</b> | <b>0.038</b> | <b>0.008</b> | 0.23         | 0.59         | 0.60         | ne           |
|              | Pop % change  | 2.3          | 1.2          | 0.6          | 1.9          | 0.4          | 0.4          | 1.3          | 0.6          | 0.5          |
| Other        | FRF rate      | 4.89         | 2.01         | 3.36         | 5.23         | 9.11         | 4.49         | 2.12         | 3.21         | 4.59         |
|              | Change        | -0.32        | ne           | ne           | -0.35        | <b>0.37</b>  | -0.07        | -0.20        | <b>-0.19</b> | ne           |
|              | P-trend       | 0.089        | ne           | ne           | 0.18         | <b>0.062</b> | 0.70         | 0.35         | <b>0.033</b> | ne           |
|              | Pop % change  | 1.5          | 0.8          | 1.0          | 1.4          | 1.8          | 1.5          | 1.2          | 1.7          | 0.9          |
| Hispanic     | FRF rate      | 8.02         | 8.19         | 8.05         | 4.65         | 7.92         | 4.83         | 9.11         | 7.04         | 7.88         |
|              | Change        | <b>-0.54</b> | -0.18        | -0.15        | -0.48        | -0.26        | <b>-0.33</b> | <b>-0.39</b> | <b>-0.21</b> | <b>-0.79</b> |
|              | P-trend       | <b>0.012</b> | 0.33         | 0.49         | 0.31         | 0.21         | <b>0.037</b> | <b>0.065</b> | <b>0.004</b> | <b>0.030</b> |
|              | Pop % change  | 3.5          | 2.5          | 3.5          | 1.8          | 3.7          | 3.7          | 2.5          | 5.6          | 3.9          |
| Non-Hispanic | FRF rate      | 13.15        | 11.18        | 10.38        | 6.60         | 13.73        | 10.76        | 10.25        | 12.28        | 10.53        |
|              | Change        | -0.02        | -0.04        | 0.01         | 0.05         | <b>0.15</b>  | 0.03         | <b>0.08</b>  | <b>0.14</b>  | <b>-0.15</b> |
|              | P-trend       | 0.73         | 0.45         | 0.91         | 0.21         | <b>0.045</b> | 0.56         | <b>0.039</b> | <b>0.022</b> | <b>0.001</b> |
|              | Pop % change  | -3.5         | -2.5         | -3.5         | -1.8         | -3.7         | -3.7         | -2.5         | -5.6         | -3.9         |
| Intent       | Homicide      | ↔            | ↔            | ↔            | ↔            | ↔            | ↔            | ↔            | ↔            | ↔            |
|              | Suicides      | ↔            | ↔            | ↔            | ↔            | ↔            | ↔            | ↔            | ↔            | ↔            |
|              | Undetermined  | ↔            | ne           | ne           | ne           | ne           | ne           | ↔            | ↔            | ne           |
|              | Unintentional | ↔            | ↔            | ↔            | ne           | ↔            | ne           | ↔            | ↔            | ne           |

FRF: firearm related fatality, Pop % change: change in population percentage from 2000 to 2010. All values are age-adjusted rates per 100,000 population. Change denotes annual change in rate per 100,000. Negative value indicates decline in firearm death rates per 100,000 from 2000 to 2010 and positive value indicates increase in firearm death rate per 100,000 from 2000 to 2010. CI denotes confidence intervals of the annual change in firearm death rate per 100,000. SMD indicates standardized mean difference; is equal to annual change/standard deviation. P-trend calculated using meta-regression indicates the significance of the decline or the increase in firearm related death rates from 2000 to 2010. Data are from Center for Disease Control and Prevention (CDC)'s National center for Injury Prevention and Control Web-based Injury Statistics Query and Reporting System (WISQARS)

**STROBE 2007 (v4) checklist of items to be included in reports of observational studies in epidemiology\***  
**Checklist for cohort, case-control, and cross-sectional studies (combined)**

| Section/Topic             | Item # | Recommendation                                                                                                                                                                                                                                                                                                                                                                                                                                                         | Reported on page # |
|---------------------------|--------|------------------------------------------------------------------------------------------------------------------------------------------------------------------------------------------------------------------------------------------------------------------------------------------------------------------------------------------------------------------------------------------------------------------------------------------------------------------------|--------------------|
| Title and abstract        | 1      | (a) Indicate the study’s design with a commonly used term in the title or the abstract                                                                                                                                                                                                                                                                                                                                                                                 | 3                  |
|                           |        | (b) Provide in the abstract an informative and balanced summary of what was done and what was found                                                                                                                                                                                                                                                                                                                                                                    | 3                  |
| <b>Introduction</b>       |        |                                                                                                                                                                                                                                                                                                                                                                                                                                                                        |                    |
| Background/rationale      | 2      | Explain the scientific background and rationale for the investigation being reported                                                                                                                                                                                                                                                                                                                                                                                   | 5                  |
| Objectives                | 3      | State specific objectives, including any pre-specified hypotheses                                                                                                                                                                                                                                                                                                                                                                                                      | 5                  |
| <b>Methods</b>            |        |                                                                                                                                                                                                                                                                                                                                                                                                                                                                        |                    |
| Study design              | 4      | Present key elements of study design early in the paper                                                                                                                                                                                                                                                                                                                                                                                                                | 6                  |
| Setting                   | 5      | Describe the setting, locations, and relevant dates, including periods of recruitment, exposure, follow-up, and data collection                                                                                                                                                                                                                                                                                                                                        | 6                  |
| Participants              | 6      | (a) <i>Cohort study</i> —Give the eligibility criteria, and the sources and methods of selection of participants. Describe methods of follow-up<br><i>Case-control study</i> —Give the eligibility criteria, and the sources and methods of case ascertainment and control selection. Give the rationale for the choice of cases and controls<br><i>Cross-sectional study</i> —Give the eligibility criteria, and the sources and methods of selection of participants | 6                  |
|                           |        | (b) <i>Cohort study</i> —For matched studies, give matching criteria and number of exposed and unexposed<br><i>Case-control study</i> —For matched studies, give matching criteria and the number of controls per case                                                                                                                                                                                                                                                 |                    |
| Variables                 | 7      | Clearly define all outcomes, exposures, predictors, potential confounders, and effect modifiers. Give diagnostic criteria, if applicable                                                                                                                                                                                                                                                                                                                               | 6                  |
| Data sources/ measurement | 8*     | For each variable of interest, give sources of data and details of methods of assessment (measurement). Describe comparability of assessment methods if there is more than one group                                                                                                                                                                                                                                                                                   | 6                  |
| Bias                      | 9      | Describe any efforts to address potential sources of bias                                                                                                                                                                                                                                                                                                                                                                                                              | 16-17              |
| Study size                | 10     | Explain how the study size was arrived at                                                                                                                                                                                                                                                                                                                                                                                                                              | 6                  |
| Quantitative variables    | 11     | Explain how quantitative variables were handled in the analyses. If applicable, describe which groupings were chosen and why                                                                                                                                                                                                                                                                                                                                           | 6                  |
| Statistical methods       | 12     | (a) Describe all statistical methods, including those used to control for confounding                                                                                                                                                                                                                                                                                                                                                                                  | 7                  |
|                           |        | (b) Describe any methods used to examine subgroups and interactions                                                                                                                                                                                                                                                                                                                                                                                                    | 7                  |
|                           |        | (c) Explain how missing data were addressed                                                                                                                                                                                                                                                                                                                                                                                                                            | na                 |
|                           |        | (d) <i>Cohort study</i> —If applicable, explain how loss to follow-up was addressed<br><i>Case-control study</i> —If applicable, explain how matching of cases and controls was addressed                                                                                                                                                                                                                                                                              | 7                  |

|                          |     |                                                                                                                                                                                                              |       |
|--------------------------|-----|--------------------------------------------------------------------------------------------------------------------------------------------------------------------------------------------------------------|-------|
|                          |     | <i>Cross-sectional study</i> —If applicable, describe analytical methods taking account of sampling strategy                                                                                                 |       |
|                          |     | (e) Describe any sensitivity analyses                                                                                                                                                                        | na    |
| <b>Results</b>           |     |                                                                                                                                                                                                              |       |
| Participants             | 13* | (a) Report numbers of individuals at each stage of study—eg numbers potentially eligible, examined for eligibility, confirmed eligible, included in the study, completing follow-up, and analysed            | 8     |
|                          |     | (b) Give reasons for non-participation at each stage                                                                                                                                                         | na    |
|                          |     | (c) Consider use of a flow diagram                                                                                                                                                                           | na    |
| Descriptive data         | 14* | (a) Give characteristics of study participants (eg demographic, clinical, social) and information on exposures and potential confounders                                                                     | na    |
|                          |     | (b) Indicate number of participants with missing data for each variable of interest                                                                                                                          | na    |
|                          |     | (c) <i>Cohort study</i> —Summarise follow-up time (eg, average and total amount)                                                                                                                             | na    |
| Outcome data             | 15* | <i>Cohort study</i> —Report numbers of outcome events or summary measures over time                                                                                                                          | na    |
|                          |     | <i>Case-control study</i> —Report numbers in each exposure category, or summary measures of exposure                                                                                                         | na    |
|                          |     | <i>Cross-sectional study</i> —Report numbers of outcome events or summary measures                                                                                                                           | 8-11  |
| Main results             | 16  | (a) Give unadjusted estimates and, if applicable, confounder-adjusted estimates and their precision (eg, 95% confidence interval). Make clear which confounders were adjusted for and why they were included | 8-11  |
|                          |     | (b) Report category boundaries when continuous variables were categorized                                                                                                                                    | na    |
|                          |     | (c) If relevant, consider translating estimates of relative risk into absolute risk for a meaningful time period                                                                                             | na    |
| Other analyses           | 17  | Report other analyses done—eg analyses of subgroups and interactions, and sensitivity analyses                                                                                                               | 8-11  |
| <b>Discussion</b>        |     |                                                                                                                                                                                                              |       |
| Key results              | 18  | Summarise key results with reference to study objectives                                                                                                                                                     | 12    |
| Limitations              | 19  | Discuss limitations of the study, taking into account sources of potential bias or imprecision. Discuss both direction and magnitude of any potential bias                                                   | 16-17 |
| Interpretation           | 20  | Give a cautious overall interpretation of results considering objectives, limitations, multiplicity of analyses, results from similar studies, and other relevant evidence                                   | 12-16 |
| Generalisability         | 21  | Discuss the generalisability (external validity) of the study results                                                                                                                                        | na    |
| <b>Other information</b> |     |                                                                                                                                                                                                              |       |
| Funding                  | 22  | Give the source of funding and the role of the funders for the present study and, if applicable, for the original study on which the present article is based                                                | na    |

\*Give information separately for cases and controls in case-control studies and, if applicable, for exposed and unexposed groups in cohort and cross-sectional studies.

**Note:** An Explanation and Elaboration article discusses each checklist item and gives methodological background and published examples of transparent reporting. The STROBE checklist is best used in conjunction with this article (freely available on the Web sites of PLoS Medicine at <http://www.plosmedicine.org/>, Annals of Internal Medicine at <http://www.annals.org/>, and Epidemiology at <http://www.epidem.com/>). Information on the STROBE Initiative is available at [www.strobe-statement.org](http://www.strobe-statement.org).
